# Supplementary material
Source: publisher figshare collection journal article supplement (https://gsajournals.figshare.com/articles/dataset/_/13394135)
Supplement: Supplementary file 1 [file 1]

## Sheet: Cl1
TermID	Term	Enrichment	logP	FDR_BH	Genes in Term	Target Genes in Term	Fraction of Targets in Term	Total Target Genes	Total Genes	Entrez Gene IDs	Gene Symbols
GO:0046916	cellular transition metal ion homeostasis	0.000689981	-7.27885	1	16	5	0.00957854	522	10917	3.84073e+24	ZnT63C,Fer3HCH,ABCB7,Ctr1A,Syx5
GO:0051649	establishment of localization in cell	0.00124922	-6.68524	1	641	48	0.091954	522	10917	40620,45380,40527,36567,32008,43018,43564,33458,43415,40664,34966,35068,42843,32028,37033,32140,43034,33862,40094,33908,42295,37337,32799,33230,36492,32797,37912,40221,33434,36197,35926,34636,35051,31381,41427,40506,31350,31144,33470,41177,39415,34427,36699,317878,39028,40489,35762,38735	cno,spin,aux,CG18327,Ant2,Clbn,RpS28a,Hrs,Doa,Itp-r83A,Syx5,Sytalpha,KrT95D,Myo10A,fab1,p24-1,CG10420,CG9175,Bet1,epsilonCOP,Ppcs,CG11110,Frq2,rempA,cbs,Frq1,Letm1,Clc,Slh,CG9067,Phax,Rab6,BicD,rb,Sbf,Arf79F,lva,Vps26,colt,eca,CG32103,KdelR,Arf51F,Nxf3,Srp68,mael,Nup44A,CG10144
GO:0046148	pigment biosynthetic process	0.00136647	-6.59552	1	68	10	0.0191571	522	10917	4.25215e+49	e,kar,Adgf-A,bw,yellow-d,Prat2,se,yellow-k,santa-maria,rb
GO:0007040	lysosome organization	0.00188094	-6.27599	1	12	4	0.00766284	522	10917	4.53803e+19	spin,Hs3st-B,Vps26,rb
GO:0046907	intracellular transport	0.00212899	-6.15211	1	473	37	0.0708812	522	10917	4.53804e+185	spin,CG18327,Ant2,Clbn,RpS28a,Hrs,Itp-r83A,Syx5,KrT95D,Myo10A,fab1,p24-1,Bet1,CG10420,epsilonCOP,Ppcs,CG11110,rempA,cbs,Letm1,Clc,CG9067,Slh,Phax,rb,Sbf,Arf79F,Vps26,eca,colt,KdelR,CG32103,Nxf3,Arf51F,Srp68,CG10144,Nup44A
GO:1902582	single-organism intracellular transport	0.0024298	-6.01994	1	395	32	0.0613027	522	10917	4.53804e+159	spin,CG18327,Ant2,Clbn,RpS28a,Hrs,Itp-r83A,KrT95D,fab1,p24-1,Bet1,CG10420,epsilonCOP,Ppcs,CG11110,rempA,cbs,Letm1,CG9067,Slh,Phax,Sbf,Arf79F,eca,colt,Vps26,KdelR,CG32103,Arf51F,Srp68,CG10144,Nup44A
GO:0009605	response to external stimulus	0.0026432	-5.93576	1	769	54	0.103448	522	10917	43582,45380,47080,39709,31011,39085,33705,39704,43873,33062,117365,39991,35275,43415,39703,40664,33764,35066,45318,38129,39708,42803,37033,39203,34024,36589,35927,40848,39707,39701,50133,34524,39700,33474,34894,41943,34947,34127,45234,34636,39710,40699,42356,42852,34193,41225,39273,31227,39976,36076,31239,32260,44121,42132	Tpi,spin,acj6,Eig71Eh,Dredd,aay,jet,Eig71Ed,ras,shakB,HBS1,CG7408,Victoria,Doa,Eig71Ec,Itp-r83A,TotM,Oli,kn,LysP,Eig71Eg,Hmgcr,fab1,E(z),santa-maria,Ih,Su(var)2-10,alphaTub84B,Eig71Ef,Eig71Eb,CG13551,aub,Eig71Ea,daw,yuri,Hel89B,beat-Ia,Pvr,Ggamma30A,Rab6,Eig71Ei,Xe7,bnl,Hsp68,Glt,Mical,CG6168,gt,Adgf-A,Hdc,egh,Fer3HCH,TotA,Atg8b
GO:0009617	response to bacterium	0.00392885	-5.53941	1	203	19	0.0363985	522	10917	3.97074e+95	Eig71Ef,Eig71Eb,CG13551,aub,Eig71Eh,Dredd,Eig71Ea,Hel89B,Eig71Ed,HBS1,Eig71Ei,Victoria,CG7408,CG6168,Eig71Ec,TotM,Eig71Eg,TotA,Su(var)2-10
GO:0006810	transport	0.00476016	-5.34747	1	1543	95	0.181992	522	10917	34679,45380,36742,39301,45883,36567,38255,33062,33961,32008,42222,43018,33545,43564,43415,40664,34966,37724,43561,32028,36589,33908,33540,32799,33230,36492,37912,40221,36197,5740325,36331,246552,34636,31381,41427,40254,318891,31227,261329,33470,39415,34427,39812,31708,36699,31239,39028,32260,40168,32318,38193,31601,35762,38735,8674091,36764,37293,33600,40527,32925,43873,33685,33458,38104,33172,42…	CG17036,spin,CG8249,CG7368,kar,CG18327,CG5687,shakB,Nha1,Ant2,CG10864,Clbn,CG8837,RpS28a,Doa,Itp-r83A,Syx5,bw,CG7912,Myo10A,Ih,epsilonCOP,CG9664,Frq2,rempA,cbs,Letm1,Clc,CG9067,CG42732,CG8850,CG30344,Rab6,rb,Sbf,CG13248,CG33124,gt,CG8176,colt,CG32103,KdelR,Pdh,CG10778,Arf51F,egh,Srp68,Fer3HCH,Rab8,tth,ABCB7,Ctr1A,Nup44A,CG10144,CG42594,CG8389,CG8908,CG10019,aux,CG8051,ras,CG12194,Hrs,CG13907,Gs1,…
GO:0055076	transition metal ion homeostasis	0.00489153	-5.32025	1	24	5	0.00957854	522	10917	3.84073e+24	ZnT63C,Fer3HCH,ABCB7,Ctr1A,Syx5
GO:0051234	establishment of localization	0.00506856	-5.2847	1	1603	98	0.187739	522	10917	34679,40620,45380,36742,39301,45883,36567,38255,33062,33961,32008,42222,43018,33545,43564,43415,40664,34966,37724,43561,32028,36589,33908,33540,32799,33230,36492,37912,40221,36197,5740325,36331,246552,34636,31381,41427,40254,318891,31227,261329,33470,39415,34427,39812,31708,36699,31239,39028,32260,40168,32318,40489,38193,31601,35762,38735,8674091,36764,37293,33600,40527,32925,43873,33685,33458,38…	CG17036,cno,spin,CG8249,CG7368,kar,CG18327,CG5687,shakB,Nha1,Ant2,CG10864,Clbn,CG8837,RpS28a,Doa,Itp-r83A,Syx5,bw,CG7912,Myo10A,Ih,epsilonCOP,CG9664,Frq2,rempA,cbs,Letm1,Clc,CG9067,CG42732,CG8850,CG30344,Rab6,rb,Sbf,CG13248,CG33124,gt,CG8176,colt,CG32103,KdelR,Pdh,CG10778,Arf51F,egh,Srp68,Fer3HCH,Rab8,tth,mael,ABCB7,Ctr1A,Nup44A,CG10144,CG42594,CG8389,CG8908,CG10019,aux,CG8051,ras,CG12194,Hrs,CG1…
GO:0051707	response to other organism	0.00527691	-5.24441	1	286	24	0.045977	522	10917	4.08484e+120	alphaTub84B,Eig71Ef,Eig71Eb,aub,CG13551,Eig71Eh,Dredd,Eig71Ea,Eig71Ed,Hel89B,Pvr,HBS1,Rab6,Eig71Ei,Victoria,CG7408,CG6168,Eig71Ec,TotM,kn,LysP,Eig71Eg,TotA,Su(var)2-10
GO:0043207	response to external biotic stimulus	0.00527691	-5.24441	1	286	24	0.045977	522	10917	4.08484e+120	alphaTub84B,Eig71Ef,Eig71Eb,aub,CG13551,Eig71Eh,Dredd,Eig71Ea,Eig71Ed,Hel89B,Pvr,HBS1,Rab6,Eig71Ei,Victoria,CG7408,CG6168,Eig71Ec,TotM,kn,LysP,Eig71Eg,TotA,Su(var)2-10
GO:0009607	response to biotic stimulus	0.0057486	-5.1588	1	288	24	0.045977	522	10917	4.08484e+120	alphaTub84B,Eig71Ef,Eig71Eb,CG13551,aub,Eig71Eh,Dredd,Eig71Ea,Eig71Ed,Hel89B,Pvr,HBS1,Rab6,Eig71Ei,Victoria,CG7408,CG6168,Eig71Ec,TotM,kn,LysP,Eig71Eg,TotA,Su(var)2-10
GO:0016192	vesicle-mediated transport	0.00645636	-5.04269	1	523	38	0.0727969	522	10917	4.53804e+191	spin,CG7368,aux,ras,Hrs,Gs1,Syx5,Sytalpha,KrT95D,p24-1,Bet1,epsilonCOP,Cct1,Frq2,cbs,CG18659,Clc,CG9067,Slh,svr,Rab6,BicD,rb,pall,Sbf,Arf79F,gt,Vps26,colt,eca,CG8176,CG10778,Pdh,KdelR,Arf51F,Rab8,tth,CG10144
GO:0036465	synaptic vesicle recycling	0.00654551	-5.02898	1	47	7	0.01341	522	10917	3.66995e+34	Arf51F,spin,Arf79F,aux,BicD,rb,Clc
GO:0048488	synaptic vesicle endocytosis	0.00654551	-5.02898	1	47	7	0.01341	522	10917	3.66995e+34	Arf51F,spin,Arf79F,aux,BicD,rb,Clc
GO:0042742	defense response to bacterium	0.00702864	-4.95776	1	184	17	0.032567	522	10917	3.97074e+85	Eig71Ef,Eig71Eb,aub,CG13551,Eig71Eh,Dredd,Eig71Ea,Hel89B,Eig71Ed,HBS1,Eig71Ei,CG7408,CG6168,Eig71Ec,TotM,Eig71Eg,Su(var)2-10
GO:0044765	single-organism transport	0.00740224	-4.90597	1	1360	84	0.16092	522	10917	45380,36742,39301,45883,36567,38255,33961,32008,42222,43018,33545,43564,43415,40664,34966,37724,43561,36589,33908,32799,33230,36492,37912,40221,36197,5740325,36331,246552,34636,31381,41427,40254,318891,31227,33470,39415,34427,39812,31708,36699,31239,32260,39028,32318,38193,31601,35762,38735,8674091,36764,33600,40527,43873,32925,33685,33458,38104,33172,42891,35068,41175,42843,45248,37033,32140,400…	spin,CG8249,CG7368,kar,CG18327,CG5687,Nha1,Ant2,CG10864,Clbn,CG8837,RpS28a,Doa,Itp-r83A,Syx5,bw,CG7912,Ih,epsilonCOP,Frq2,rempA,cbs,Letm1,Clc,CG9067,CG42732,CG8850,CG30344,Rab6,rb,Sbf,CG13248,CG33124,gt,colt,CG32103,KdelR,Pdh,CG10778,Arf51F,egh,Fer3HCH,Srp68,tth,ABCB7,Ctr1A,Nup44A,CG10144,CG42594,CG8389,CG10019,aux,ras,CG8051,CG12194,Hrs,CG13907,Gs1,Orct,Sytalpha,CG9444,KrT95D,Nckx30C,fab1,p24-1,…
GO:0006813	potassium ion transport	0.00762438	-4.8764	1	37	6	0.0114943	522	10917	3.60714e+33	KCNQ,Irk2,Ih,CG10864,CG42732,CG42594
GO:0044550	secondary metabolite biosynthetic process	0.00869737	-4.74473	1	38	6	0.0114943	522	10917	3.77244e+29	bw,yellow-d,e,kar,yellow-k,rb
GO:0042440	pigment metabolic process	0.00878433	-4.73479	1	115	12	0.0229885	522	10917	4.25214e+59	e,Sp7,kar,Adgf-A,bw,RhoL,yellow-d,Prat2,se,yellow-k,santa-maria,rb
GO:0006952	defense response	0.00914629	-4.69441	1	332	26	0.0498084	522	10917	3.40884e+130	CG7227,Eig71Ef,Eig71Eb,aub,CG13551,Eig71Eh,Dredd,Eig71Ea,Hel89B,Eig71Ed,RhoL,Pvr,CG1887,HBS1,Rab6,Eig71Ei,CG7408,CG6168,Eig71Ec,Sp7,PGRP-SB2,TotM,kn,Eig71Eg,santa-maria,Su(var)2-10
GO:0051641	cellular localization	0.00985472	-4.6198	1	767	51	0.0977011	522	10917	40620,45380,40527,36567,32008,43018,43564,33458,43415,40664,34966,35068,42843,32028,37033,32140,43034,33862,40094,33908,42295,37337,32799,33230,34524,36492,37912,32797,40221,42752,33434,36197,35926,34636,35051,31381,41427,40675,40506,31350,31144,33470,41177,39415,34427,36699,317878,39028,40489,35762,38735	cno,spin,aux,CG18327,Ant2,Clbn,RpS28a,Hrs,Doa,Itp-r83A,Syx5,Sytalpha,KrT95D,Myo10A,fab1,p24-1,CG10420,CG9175,Bet1,epsilonCOP,Ppcs,CG11110,Frq2,rempA,aub,cbs,Letm1,Frq1,Clc,orb,Slh,CG9067,Phax,Rab6,BicD,rb,Sbf,CRMP,Arf79F,lva,Vps26,colt,eca,CG32103,KdelR,Arf51F,Nxf3,Srp68,mael,Nup44A,CG10144
GO:0006875	cellular metal ion homeostasis	0.00987433	-4.61782	1	39	6	0.0114943	522	10917	3.84073e+29	ZnT63C,Fer3HCH,Itp-r83A,ABCB7,Ctr1A,Syx5
GO:0008333	endosome to lysosome transport	0.0101371	-4.59155	1	10	3	0.00574713	522	10917	334584538037033	Hrs,spin,fab1
GO:0000187	activation of MAPK activity	0.0101371	-4.59155	1	10	3	0.00574713	522	10917	423563956441020	bnl,btl,Mkk4
GO:0046847	filopodium assembly	0.0101371	-4.59155	1	10	3	0.00574713	522	10917	423563956432028	bnl,btl,Myo10A
GO:0090099	negative regulation of decapentaplegic signaling pathway	0.0128385	-4.3553	1	4	2	0.00383142	522	10917	4277045380	Irk2,spin
GO:0046012	positive regulation of oskar mRNA translation	0.0128385	-4.3553	1	4	2	0.00383142	522	10917	3452442752	aub,orb
GO:0060213	positive regulation of nuclear-transcribed mRNA poly(A) tail shortening	0.0128385	-4.3553	1	4	2	0.00383142	522	10917	345243355150	aub,AGO3
GO:0031442	positive regulation of mRNA 3'-end processing	0.0128385	-4.3553	1	4	2	0.00383142	522	10917	345243355150	aub,AGO3
GO:0007429	secondary branching, open tracheal system	0.0128385	-4.3553	1	4	2	0.00383142	522	10917	4235639564	bnl,btl
GO:0050685	positive regulation of mRNA processing	0.0128385	-4.3553	1	4	2	0.00383142	522	10917	345243355150	aub,AGO3
GO:0071417	cellular response to organonitrogen compound	0.0129614	-4.34578	1	30	5	0.00957854	522	10917	3.91513e+24	Ilp3,Ilp6,Pvr,Ilp2,CG5189
GO:0042559	pteridine-containing compound biosynthetic process	0.01345	-4.30878	1	11	3	0.00574713	522	10917	377243897341279	bw,se,pug
GO:0032968	positive regulation of transcription elongation from RNA polymerase II promoter	0.01345	-4.30878	1	11	3	0.00574713	522	10917	414274079042749	Sbf,TfIIFalpha,EloA
GO:0048066	developmental pigmentation	0.0153698	-4.17535	1	68	8	0.0153257	522	10917	3.77244e+39	bw,yellow-d,e,se,kar,santa-maria,yellow-k,rb
GO:0031349	positive regulation of defense response	0.0157214	-4.15273	1	43	6	0.0114943	522	10917	4.09183e+30	Sp7,aub,HBS1,Dredd,CG10157,Su(var)2-10
GO:0033057	multicellular organismal reproductive behavior	0.0159418	-4.13881	1	110	11	0.0210728	522	10917	3.22455e+57	fne,spin,Pde1c,Ilp2,aay,egh,Ilp3,ash1,Gr68a,Gr32a,Acp98AB
GO:0006726	eye pigment biosynthetic process	0.0169415	-4.07799	1	32	5	0.00957854	522	10917	3.77244e+24	bw,se,kar,santa-maria,rb
GO:0032786	positive regulation of DNA-templated transcription, elongation	0.0173064	-4.05668	1	12	3	0.00574713	522	10917	414274079042749	Sbf,TfIIFalpha,EloA
GO:0044705	multi-organism reproductive behavior	0.0173417	-4.05464	1	126	12	0.0229885	522	10917	3.22455e+62	fne,spin,Pde1c,Ilp2,aay,egh,Ilp3,ash1,Gr68a,Acp98AB,Gr32a,dnc
GO:0051046	regulation of secretion	0.0174915	-4.04604	1	44	6	0.0114943	522	10917	3.27993e+29	Frq2,p24-1,BicD,Frq1,eca,Ih
GO:1901617	organic hydroxy compound biosynthetic process	0.0174915	-4.04604	1	44	6	0.0114943	522	10917	3.22851e+32	IP3K2,Cct1,yellow-d,e,mld,yellow-k
GO:0007033	vacuole organization	0.0190286	-3.96181	1	22	4	0.00766284	522	10917	4.53803e+19	spin,Hs3st-B,Vps26,rb
GO:0032940	secretion by cell	0.0191134	-3.95737	1	158	14	0.0268199	522	10917	3.34583e+69	Hrs,Frq2,Doa,Arf79F,Frq1,Letm1,Clc,Slh,Syx5,Arf51F,Sytalpha,Rab6,CG9175,rb
GO:0043324	pigment metabolic process involved in developmental pigmentation	0.0192047	-3.9526	1	33	5	0.00957854	522	10917	3.77244e+24	bw,se,kar,santa-maria,rb
GO:0043474	pigment metabolic process involved in pigmentation	0.0192047	-3.9526	1	33	5	0.00957854	522	10917	3.77244e+24	bw,se,kar,santa-maria,rb
GO:0042441	eye pigment metabolic process	0.0192047	-3.9526	1	33	5	0.00957854	522	10917	3.77244e+24	bw,se,kar,santa-maria,rb
GO:0019098	reproductive behavior	0.0194081	-3.94206	1	128	12	0.0229885	522	10917	3.22455e+62	fne,spin,Pde1c,Ilp2,aay,egh,Ilp3,ash1,Gr68a,Acp98AB,Gr32a,dnc
GO:0016197	endosomal transport	0.0195511	-3.93472	1	71	8	0.0153257	522	10917	3.34584e+39	Hrs,Sbf,spin,Arf79F,Vps26,Arf51F,fab1,CG10144
GO:0051179	localization	0.0201958	-3.90228	1	1920	110	0.210728	522	10917	34679,40620,45380,36742,39301,45883,36567,38255,41136,33062,33961,32008,42222,43018,33545,43564,43415,40664,34966,37724,43561,32028,36589,33908,33540,32799,39368,33230,36492,3772382,37912,40221,42752,36197,5740325,36331,42596,246552,34636,31381,41427,40254,40675,318891,31227,261329,34581,33470,39415,34427,39812,31708,36699,31239,39028,32260,40168,32318,40489,38193,31601,35762,38735,8674091,36764,…	CG17036,cno,spin,CG8249,CG7368,kar,CG18327,CG5687,RhoL,shakB,Nha1,Ant2,CG10864,Clbn,CG8837,RpS28a,Doa,Itp-r83A,Syx5,bw,CG7912,Myo10A,Ih,epsilonCOP,CG9664,Frq2,rols,rempA,cbs,cp309,Letm1,Clc,orb,CG9067,CG42732,CG8850,how,CG30344,Rab6,rb,Sbf,CG13248,CRMP,CG33124,gt,CG8176,spag4,colt,CG32103,KdelR,Pdh,CG10778,Arf51F,egh,Srp68,Fer3HCH,Rab8,tth,mael,ABCB7,Ctr1A,Nup44A,CG10144,CG42594,CG8389,CG8908,CG1…
GO:1902531	regulation of intracellular signal transduction	0.020548	-3.88499	1	305	23	0.0440613	522	10917	4.06204e+120	cno,kappaB-Ras,CG18659,CG6182,CG5916,eIF-4B,CG34408,Pvr,dnc,bnl,btl,CG30456,Mkk4,Sbf,S6kII,rad,kn,Spec2,Mkp,Fer3HCH,Hmgcr,CG11526,Su(var)2-10
GO:1903313	positive regulation of mRNA metabolic process	0.0207235	-3.87649	1	5	2	0.00383142	522	10917	345243355150	aub,AGO3
GO:0060211	regulation of nuclear-transcribed mRNA poly(A) tail shortening	0.0207235	-3.87649	1	5	2	0.00383142	522	10917	345243355150	aub,AGO3
GO:0072583	clathrin-mediated endocytosis	0.0207235	-3.87649	1	5	2	0.00383142	522	10917	26132940221	CG8176,Clc
GO:0006728	pteridine biosynthetic process	0.0207235	-3.87649	1	5	2	0.00383142	522	10917	3772438973	bw,se
GO:0061014	positive regulation of mRNA catabolic process	0.0207235	-3.87649	1	5	2	0.00383142	522	10917	345243355150	aub,AGO3
GO:0006878	cellular copper ion homeostasis	0.0207235	-3.87649	1	5	2	0.00383142	522	10917	3160134966	Ctr1A,Syx5
GO:1900151	regulation of nuclear-transcribed mRNA catabolic process, deadenylation-dependent decay	0.0207235	-3.87649	1	5	2	0.00383142	522	10917	345243355150	aub,AGO3
GO:0098542	defense response to other organism	0.020782	-3.87367	1	223	18	0.0344828	522	10917	3.97074e+90	Eig71Ef,Eig71Eb,CG13551,aub,Eig71Eh,Dredd,Eig71Ea,Hel89B,Eig71Ed,HBS1,Rab6,Eig71Ei,CG7408,CG6168,Eig71Ec,TotM,Eig71Eg,Su(var)2-10
GO:0048193	Golgi vesicle transport	0.0213421	-3.84707	1	86	9	0.0172414	522	10917	3.64924e+44	cbs,Arf79F,eca,KdelR,CG9067,KrT95D,p24-1,Bet1,epsilonCOP
GO:0051705	multi-organism behavior	0.0214946	-3.83995	1	176	15	0.0287356	522	10917	3.22455e+77	fne,spin,Pde1c,Ilp2,eca,aay,CG6175,Ilp3,egh,ash1,Acp98AB,dnc,Sesn,Gr32a,Gr68a
GO:0043406	positive regulation of MAP kinase activity	0.0217137	-3.82981	1	13	3	0.00574713	522	10917	423563956441020	bnl,btl,Mkk4
GO:0043405	regulation of MAP kinase activity	0.0221866	-3.80827	1	23	4	0.00766284	522	10917	4.23564e+21	bnl,btl,Mkk4,Mkp
GO:0008016	regulation of heart contraction	0.0221866	-3.80827	1	23	4	0.00766284	522	10917	3.60714e+19	KCNQ,how,Ctr1A,rad
GO:0030003	cellular cation homeostasis	0.0236109	-3.74605	1	47	6	0.0114943	522	10917	3.84073e+29	ZnT63C,Fer3HCH,Itp-r83A,ABCB7,Ctr1A,Syx5
GO:0045475	locomotor rhythm	0.0236743	-3.74337	1	60	7	0.01341	522	10917	3.37054e+34	jet,Ilp3,e,S6kII,Ilp2,Ih,dnc
GO:2000241	regulation of reproductive process	0.0236743	-3.74337	1	60	7	0.01341	522	10917	3.12395e+34	egh,spin,Doa,p24-1,mael,aub,eca
GO:0007617	mating behavior	0.0241343	-3.72412	1	117	11	0.0210728	522	10917	3.22455e+57	fne,spin,Pde1c,Ilp2,aay,egh,Ilp3,Gr68a,Gr32a,dnc,Acp98AB
GO:0046903	secretion	0.0254563	-3.67079	1	164	14	0.0268199	522	10917	3.34583e+69	Hrs,Frq2,Doa,Arf79F,Letm1,Frq1,Clc,Slh,Syx5,Arf51F,Sytalpha,Rab6,CG9175,rb
GO:0071375	cellular response to peptide hormone stimulus	0.0256456	-3.66338	1	24	4	0.00766284	522	10917	3.91513e+19	Ilp3,Ilp6,Pvr,Ilp2
GO:0032869	cellular response to insulin stimulus	0.0256456	-3.66338	1	24	4	0.00766284	522	10917	3.91513e+19	Ilp3,Ilp6,Pvr,Ilp2
GO:1901653	cellular response to peptide	0.0256456	-3.66338	1	24	4	0.00766284	522	10917	3.91513e+19	Ilp3,Ilp6,Pvr,Ilp2
GO:0035159	regulation of tube length, open tracheal system	0.0256456	-3.66338	1	24	4	0.00766284	522	10917	4.01503e+19	serp,ds,Mmp1,verm
GO:0010243	response to organonitrogen compound	0.0263083	-3.63787	1	75	8	0.0153257	522	10917	4.28523e+40	Hsp68,moody,Ilp2,CG5189,Ilp3,Ilp6,CG30344,Pvr
GO:0007610	behavior	0.0267386	-3.62165	1	540	36	0.0689655	522	10917	4.53805e+184	spin,acj6,verm,aay,jet,Ilp3,shakB,dnc,Gr68a,Doa,Itp-r83A,Pde1c,Hmgcr,mld,CCKLR-17D3,CG9664,Ih,Acp98AB,Sesn,fne,Pino,Obp99b,e,Ilp2,CG6175,ash1,svr,Gr32a,Pkc98E,CRMP,moody,S6kII,rad,eca,Arf51F,egh
GO:0060180	female mating behavior	0.0271535	-3.60625	1	36	5	0.00957854	522	10917	3.91513e+27	Ilp3,egh,spin,Ilp2,Acp98AB
GO:0030001	metal ion transport	0.0274701	-3.59466	1	150	13	0.0249042	522	10917	3.60714e+68	KCNQ,Irk2,Itp-r83A,Letm1,CG42732,ZnT63C,Fer3HCH,Nckx30C,Nha1,Ctr1A,CG10864,Ih,CG42594
GO:0048584	positive regulation of response to stimulus	0.0276779	-3.58712	1	314	23	0.0440613	522	10917	3.45243e+119	aub,Dredd,daw,eIF-4B,Pvr,HBS1,CG10157,bnl,CG30456,Hrs,btl,Mkk4,CRMP,Sp7,Oct-TyrR,eca,kn,Fer3HCH,Hmgcr,mld,Ih,CG11526,Su(var)2-10
GO:0042063	gliogenesis	0.0282232	-3.56761	1	76	8	0.0153257	522	10917	4.23564e+39	bnl,btl,cno,spin,vnd,moody,how,wrapper
GO:0043473	pigmentation	0.0282232	-3.56761	1	76	8	0.0153257	522	10917	3.77244e+39	bw,yellow-d,e,se,kar,santa-maria,yellow-k,rb
GO:1901652	response to peptide	0.0294108	-3.52639	1	25	4	0.00766284	522	10917	3.91513e+19	Ilp3,Ilp6,Pvr,Ilp2
GO:0032868	response to insulin	0.0294108	-3.52639	1	25	4	0.00766284	522	10917	3.91513e+19	Ilp3,Ilp6,Pvr,Ilp2
GO:0001101	response to acid chemical	0.0294108	-3.52639	1	25	4	0.00766284	522	10917	4.28522e+20	Hsp68,CG30344,CG5189,TotA
GO:0043434	response to peptide hormone	0.0294108	-3.52639	1	25	4	0.00766284	522	10917	3.91513e+19	Ilp3,Ilp6,Pvr,Ilp2
GO:0061013	regulation of mRNA catabolic process	0.0301099	-3.5029	1	6	2	0.00383142	522	10917	345243355150	aub,AGO3
GO:0015936	coenzyme A metabolic process	0.0301099	-3.5029	1	6	2	0.00383142	522	10917	4280342295	Hmgcr,Ppcs
GO:0019889	pteridine metabolic process	0.0301099	-3.5029	1	6	2	0.00383142	522	10917	3772438973	bw,se
GO:2000021	regulation of ion homeostasis	0.0301099	-3.5029	1	6	2	0.00383142	522	10917	4066433062	Itp-r83A,shakB
GO:0048069	eye pigmentation	0.0302049	-3.49975	1	37	5	0.00957854	522	10917	3.77244e+24	bw,se,kar,santa-maria,rb
GO:0055065	metal ion homeostasis	0.0310214	-3.47308	1	50	6	0.0114943	522	10917	3.84073e+29	ZnT63C,Fer3HCH,Itp-r83A,ABCB7,Ctr1A,Syx5
GO:0051588	regulation of neurotransmitter transport	0.0321867	-3.4362	1	15	3	0.00574713	522	10917	327993505132797	Frq2,BicD,Frq1
GO:0034243	regulation of transcription elongation from RNA polymerase II promoter	0.0321867	-3.4362	1	15	3	0.00574713	522	10917	414274079042749	Sbf,TfIIFalpha,EloA
GO:0046928	regulation of neurotransmitter secretion	0.0321867	-3.4362	1	15	3	0.00574713	522	10917	327993505132797	Frq2,BicD,Frq1
GO:0042558	pteridine-containing compound metabolic process	0.0321867	-3.4362	1	15	3	0.00574713	522	10917	377243897341279	bw,se,pug
GO:0042438	melanin biosynthetic process	0.0321867	-3.4362	1	15	3	0.00574713	522	10917	377034252139678	yellow-d,e,yellow-k
GO:0042693	muscle cell fate commitment	0.0321867	-3.4362	1	15	3	0.00574713	522	10917	425964083545318	how,Antp,kn
GO:0071902	positive regulation of protein serine/threonine kinase activity	0.0321867	-3.4362	1	15	3	0.00574713	522	10917	423563956441020	bnl,btl,Mkk4
GO:0044706	multi-multicellular organism process	0.0332971	-3.40229	1	123	11	0.0210728	522	10917	3.22455e+57	fne,spin,Pde1c,Ilp2,aay,egh,Ilp3,ash1,Acp98AB,Gr32a,Gr68a
GO:0006897	endocytosis	0.0354788	-3.33882	1	322	23	0.0440613	522	10917	1.17353e+116	Cct1,spin,CG7368,aux,Clc,CG18659,Slh,ras,svr,BicD,rb,pall,Hrs,gt,Arf79F,CG8176,colt,Gs1,CG10778,Syx5,Pdh,Arf51F,tth
GO:0016482	cytoplasmic transport	0.0365819	-3.3082	1	238	18	0.0344828	522	10917	3.73375e+90	CG11110,spin,cbs,CG9067,Phax,Clbn,RpS28a,Hrs,Itp-r83A,eca,Nxf3,KrT95D,Srp68,fab1,CG10420,Bet1,Ppcs,Nup44A
GO:0048512	circadian behavior	0.0368437	-3.30107	1	80	8	0.0153257	522	10917	3.37054e+41	jet,Ilp3,e,S6kII,Ilp2,mld,Ih,dnc
GO:0022411	cellular component disassembly	0.0378735	-3.2735	1	27	4	0.00766284	522	10917	4.12254e+20	Mical,aux,HBS1,Mmp1
GO:0043241	protein complex disassembly	0.038244	-3.26377	1	16	3	0.00574713	522	10917	4122540527117360	Mical,aux,HBS1
GO:0043624	cellular protein complex disassembly	0.038244	-3.26377	1	16	3	0.00574713	522	10917	4122540527117360	Mical,aux,HBS1
GO:0048511	rhythmic process	0.0397809	-3.22437	1	96	9	0.0172414	522	10917	4.25213e+46	e,S6kII,Ilp2,jet,Ilp3,mld,Ih,dnc,stl
GO:0019748	secondary metabolic process	0.0397809	-3.22437	1	96	9	0.0172414	522	10917	4.25214e+44	e,Sp7,kar,bw,RhoL,yellow-d,E(z),yellow-k,rb
GO:0045089	positive regulation of innate immune response	0.0406144	-3.20363	1	40	5	0.00957854	522	10917	4.09183e+25	Sp7,aub,HBS1,Dredd,Su(var)2-10
GO:0031440	regulation of mRNA 3'-end processing	0.0408369	-3.19817	1	7	2	0.00383142	522	10917	345243355150	aub,AGO3
GO:0032844	regulation of homeostatic process	0.0408369	-3.19817	1	7	2	0.00383142	522	10917	4066433062	Itp-r83A,shakB
GO:0034032	purine nucleoside bisphosphate metabolic process	0.0408369	-3.19817	1	7	2	0.00383142	522	10917	4280342295	Hmgcr,Ppcs
GO:0035001	dorsal trunk growth, open tracheal system	0.0408369	-3.19817	1	7	2	0.00383142	522	10917	3794940149	Mmp1,verm
GO:0033875	ribonucleoside bisphosphate metabolic process	0.0408369	-3.19817	1	7	2	0.00383142	522	10917	4280342295	Hmgcr,Ppcs
GO:0061356	regulation of Wnt protein secretion	0.0408369	-3.19817	1	7	2	0.00383142	522	10917	3214041177	p24-1,eca
GO:0033865	nucleoside bisphosphate metabolic process	0.0408369	-3.19817	1	7	2	0.00383142	522	10917	4280342295	Hmgcr,Ppcs
GO:0061357	positive regulation of Wnt protein secretion	0.0408369	-3.19817	1	7	2	0.00383142	522	10917	3214041177	p24-1,eca
GO:0007312	oocyte nucleus migration involved in oocyte dorsal/ventral axis specification	0.0408369	-3.19817	1	7	2	0.00383142	522	10917	4048935051	mael,BicD
GO:0051181	cofactor transport	0.0408369	-3.19817	1	7	2	0.00383142	522	10917	3819333470	ABCB7,colt
GO:0034389	lipid particle organization	0.0408369	-3.19817	1	7	2	0.00383142	522	10917	4342841177	Pkc98E,eca
GO:0055085	transmembrane transport	0.0415531	-3.18078	1	433	29	0.0555556	522	10917	3.67645e+148	CG8389,spin,CG8249,kar,CG10019,CG8791,ZnT63C,CG8051,CG5687,CG12194,CG8850,CG30344,Nha1,CG10864,Ant2,CG8837,KCNQ,CG13248,CG33124,Itp-r83A,CG13907,CG32103,Orct,Nckx30C,ABCB7,CG10420,Ctr1A,Ih,CG42594
GO:0007622	rhythmic behavior	0.0417541	-3.17596	1	82	8	0.0153257	522	10917	3.37054e+41	jet,Ilp3,e,S6kII,Ilp2,mld,Ih,dnc
GO:0046112	nucleobase biosynthetic process	0.0448371	-3.10472	1	17	3	0.00574713	522	10917	406753875339976	CRMP,Prat2,Adgf-A
GO:0032984	macromolecular complex disassembly	0.0448371	-3.10472	1	17	3	0.00574713	522	10917	4122540527117360	Mical,aux,HBS1
GO:0045727	positive regulation of translation	0.0448371	-3.10472	1	17	3	0.00574713	522	10917	345244338542752	aub,Hrb98DE,orb
GO:0043900	regulation of multi-organism process	0.0468158	-3.06154	1	130	11	0.0210728	522	10917	3.67695e+54	casp,spin,Doa,aub,eca,Dredd,egh,Hel89B,p24-1,mael,CG10157
GO:0071702	organic substance transport	0.0469772	-3.05809	1	492	32	0.0613027	522	10917	3.73374e+160	CG11110,cbs,Clc,Slh,Phax,CG8850,BicD,Rab6,rb,Ant2,Clbn,RpS28a,Hrs,CG13248,Doa,Vps26,colt,Syx5,Arf51F,Orct,Nxf3,KrT95D,CG9444,egh,Myo10A,Srp68,Rab8,ABCB7,CG9175,CG10420,Nup44A,CG10144
GO:0060401	cytosolic calcium ion transport	0.0478153	-3.04041	1	1	1	0.00191571	522	10917	40664	Itp-r83A
GO:0042182	ketone catabolic process	0.0478153	-3.04041	1	1	1	0.00191571	522	10917	32858	Cyp18a1
GO:0043617	cellular response to sucrose starvation	0.0478153	-3.04041	1	1	1	0.00191571	522	10917	39976	Adgf-A
GO:1901532	regulation of hematopoietic progenitor cell differentiation	0.0478153	-3.04041	1	1	1	0.00191571	522	10917	40506	Arf79F
GO:0003254	regulation of membrane depolarization	0.0478153	-3.04041	1	1	1	0.00191571	522	10917	33062	shakB
GO:0016544	male courtship behavior, tapping to detect pheromone	0.0478153	-3.04041	1	1	1	0.00191571	522	10917	39324	Gr68a
GO:0006851	mitochondrial calcium ion transport	0.0478153	-3.04041	1	1	1	0.00191571	522	10917	37912	Letm1
GO:0042698	ovulation cycle	0.0478153	-3.04041	1	1	1	0.00191571	522	10917	37619	stl
GO:2000254	regulation of male germ cell proliferation	0.0478153	-3.04041	1	1	1	0.00191571	522	10917	43415	Doa
GO:0035008	positive regulation of melanization defense response	0.0478153	-3.04041	1	1	1	0.00191571	522	10917	40918	Sp7
GO:0015679	plasma membrane copper ion transport	0.0478153	-3.04041	1	1	1	0.00191571	522	10917	31601	Ctr1A
GO:0060402	calcium ion transport into cytosol	0.0478153	-3.04041	1	1	1	0.00191571	522	10917	40664	Itp-r83A
GO:0050941	negative regulation of pigment cell differentiation	0.0478153	-3.04041	1	1	1	0.00191571	522	10917	33139	S6kII
GO:0045445	myoblast differentiation	0.0478153	-3.04041	1	1	1	0.00191571	522	10917	30983	l(1)sc
GO:0046439	L-cysteine metabolic process	0.0478153	-3.04041	1	1	1	0.00191571	522	10917	37139	CG5493
GO:1900377	negative regulation of secondary metabolite biosynthetic process	0.0478153	-3.04041	1	1	1	0.00191571	522	10917	42521	e
GO:0001541	ovarian follicle development	0.0478153	-3.04041	1	1	1	0.00191571	522	10917	37619	stl
GO:1902459	positive regulation of stem cell maintenance	0.0478153	-3.04041	1	1	1	0.00191571	522	10917	38648	scny
GO:0051952	regulation of amine transport	0.0478153	-3.04041	1	1	1	0.00191571	522	10917	36589	Ih
GO:0043042	amino acid adenylylation by nonribosomal peptide synthase	0.0478153	-3.04041	1	1	1	0.00191571	522	10917	42521	e
GO:0070995	NADPH oxidation	0.0478153	-3.04041	1	1	1	0.00191571	522	10917	41225	Mical
GO:0035106	operant conditioning	0.0478153	-3.04041	1	1	1	0.00191571	522	10917	33139	S6kII
GO:2000036	regulation of stem cell maintenance	0.0478153	-3.04041	1	1	1	0.00191571	522	10917	38648	scny
GO:0010106	cellular response to iron ion starvation	0.0478153	-3.04041	1	1	1	0.00191571	522	10917	32260	Fer3HCH
GO:0019417	sulfur oxidation	0.0478153	-3.04041	1	1	1	0.00191571	522	10917	41225	Mical
GO:0007490	tergite morphogenesis	0.0478153	-3.04041	1	1	1	0.00191571	522	10917	36378	Cyp301a1
GO:0016264	gap junction assembly	0.0478153	-3.04041	1	1	1	0.00191571	522	10917	33062	shakB
GO:1900376	regulation of secondary metabolite biosynthetic process	0.0478153	-3.04041	1	1	1	0.00191571	522	10917	42521	e
GO:0009758	carbohydrate utilization	0.0478153	-3.04041	1	1	1	0.00191571	522	10917	39150	Ilp2
GO:0048022	negative regulation of melanin biosynthetic process	0.0478153	-3.04041	1	1	1	0.00191571	522	10917	42521	e
GO:0055091	phospholipid homeostasis	0.0478153	-3.04041	1	1	1	0.00191571	522	10917	42295	Ppcs
GO:0048021	regulation of melanin biosynthetic process	0.0478153	-3.04041	1	1	1	0.00191571	522	10917	42521	e
GO:0051597	response to methylmercury	0.0478153	-3.04041	1	1	1	0.00191571	522	10917	44121	TotA
GO:1902036	regulation of hematopoietic stem cell differentiation	0.0478153	-3.04041	1	1	1	0.00191571	522	10917	40506	Arf79F
GO:0016108	tetraterpenoid metabolic process	0.0478153	-3.04041	1	1	1	0.00191571	522	10917	34024	santa-maria
GO:2000255	negative regulation of male germ cell proliferation	0.0478153	-3.04041	1	1	1	0.00191571	522	10917	43415	Doa
GO:0016116	carotenoid metabolic process	0.0478153	-3.04041	1	1	1	0.00191571	522	10917	34024	santa-maria
GO:0043041	amino acid activation for nonribosomal peptide biosynthetic process	0.0478153	-3.04041	1	1	1	0.00191571	522	10917	42521	e
GO:0007518	myoblast fate determination	0.0478153	-3.04041	1	1	1	0.00191571	522	10917	30983	l(1)sc
GO:0060048	cardiac muscle contraction	0.0478153	-3.04041	1	1	1	0.00191571	522	10917	36071	KCNQ
GO:0022602	ovulation cycle process	0.0478153	-3.04041	1	1	1	0.00191571	522	10917	37619	stl
GO:0007636	chemosensory jump behavior	0.0478153	-3.04041	1	1	1	0.00191571	522	10917	47080	acj6
GO:0006656	phosphatidylcholine biosynthetic process	0.0478153	-3.04041	1	1	1	0.00191571	522	10917	117353	Cct1
GO:0035616	histone H2B conserved C-terminal lysine deubiquitination	0.0478153	-3.04041	1	1	1	0.00191571	522	10917	38648	scny
GO:0042572	retinol metabolic process	0.0478153	-3.04041	1	1	1	0.00191571	522	10917	39812	Pdh
GO:1901031	regulation of response to reactive oxygen species	0.0478153	-3.04041	1	1	1	0.00191571	522	10917	37755	Sesn
GO:0035291	specification of segmental identity, intercalary segment	0.0478153	-3.04041	1	1	1	0.00191571	522	10917	45318	kn
GO:0014059	regulation of dopamine secretion	0.0478153	-3.04041	1	1	1	0.00191571	522	10917	36589	Ih
GO:0010644	cell communication by electrical coupling	0.0478153	-3.04041	1	1	1	0.00191571	522	10917	33062	shakB
GO:0050932	regulation of pigment cell differentiation	0.0478153	-3.04041	1	1	1	0.00191571	522	10917	33139	S6kII
GO:0046344	ecdysteroid catabolic process	0.0478153	-3.04041	1	1	1	0.00191571	522	10917	32858	Cyp18a1
GO:0060386	synapse assembly involved in innervation	0.0478153	-3.04041	1	1	1	0.00191571	522	10917	41225	Mical
GO:0032011	ARF protein signal transduction	0.0478153	-3.04041	1	1	1	0.00191571	522	10917	40506	Arf79F
GO:0048625	myoblast fate commitment	0.0478153	-3.04041	1	1	1	0.00191571	522	10917	30983	l(1)sc
GO:0060285	cilium-dependent cell motility	0.0478153	-3.04041	1	1	1	0.00191571	522	10917	3772382	cp309
GO:0043124	negative regulation of I-kappaB kinase/NF-kappaB signaling	0.0478153	-3.04041	1	1	1	0.00191571	522	10917	35667	kappaB-Ras
GO:0051209	release of sequestered calcium ion into cytosol	0.0478153	-3.04041	1	1	1	0.00191571	522	10917	40664	Itp-r83A
GO:0050433	regulation of catecholamine secretion	0.0478153	-3.04041	1	1	1	0.00191571	522	10917	36589	Ih
GO:2000302	positive regulation of synaptic vesicle exocytosis	0.0478153	-3.04041	1	1	1	0.00191571	522	10917	35051	BicD
GO:0007169	transmembrane receptor protein tyrosine kinase signaling pathway	0.0483835	-3.0286	1	115	10	0.0191571	522	10917	4.23564e+49	bnl,btl,Hrs,gt,Ilp2,Ilp3,Ilp6,Pvr,fus,CG10702
GO:1901699	cellular response to nitrogen compound	0.0486232	-3.02365	1	42	5	0.00957854	522	10917	3.91513e+24	Ilp3,Ilp6,Pvr,Ilp2,CG5189
GO:0006873	cellular ion homeostasis	0.0500244	-2.99525	1	56	6	0.0114943	522	10917	3.84073e+29	ZnT63C,Fer3HCH,Itp-r83A,ABCB7,Ctr1A,Syx5
GO:0007618	mating	0.0512793	-2.97047	1	132	11	0.0210728	522	10917	3.22455e+57	fne,spin,Pde1c,Ilp2,aay,egh,Ilp3,Gr68a,Gr32a,dnc,Acp98AB
GO:0046165	alcohol biosynthetic process	0.0519535	-2.95741	1	18	3	0.00574713	522	10917	3.22851e+17	IP3K2,Cct1,mld
GO:0032147	activation of protein kinase activity	0.0519535	-2.95741	1	18	3	0.00574713	522	10917	423563956441020	bnl,btl,Mkk4
GO:0046662	regulation of oviposition	0.0519535	-2.95741	1	18	3	0.00574713	522	10917	312393214041177	egh,p24-1,eca
GO:0007380	specification of segmental identity, head	0.0519535	-2.95741	1	18	3	0.00574713	522	10917	312274083545318	gt,Antp,kn
GO:0050801	ion homeostasis	0.0523658	-2.9495	1	71	7	0.01341	522	10917	3.84073e+34	ZnT63C,Fer3HCH,Itp-r83A,ABCB7,Ctr1A,Syx5,Ppcs
GO:0048935	peripheral nervous system neuron development	0.0527552	-2.94209	1	8	2	0.00383142	522	10917	3123931011	egh,Dredd
GO:0007630	jump response	0.0527552	-2.94209	1	8	2	0.00383142	522	10917	3306247080	shakB,acj6
GO:0045938	positive regulation of circadian sleep/wake cycle, sleep	0.0527552	-2.94209	1	8	2	0.00383142	522	10917	276868536589	mld,Ih
GO:0042694	muscle cell fate specification	0.0527552	-2.94209	1	8	2	0.00383142	522	10917	4083545318	Antp,kn
GO:0090097	regulation of decapentaplegic signaling pathway	0.0527552	-2.94209	1	8	2	0.00383142	522	10917	4277045380	Irk2,spin
GO:0048934	peripheral nervous system neuron differentiation	0.0527552	-2.94209	1	8	2	0.00383142	522	10917	3123931011	egh,Dredd
GO:1900424	regulation of defense response to bacterium	0.052917	-2.93903	1	30	4	0.00766284	522	10917	3.67694e+19	casp,Hel89B,Dredd,CG10157
GO:0031347	regulation of defense response	0.0549078	-2.9021	1	102	9	0.0172414	522	10917	3.67694e+45	casp,scny,Sp7,aub,Dredd,Hel89B,HBS1,CG10157,Su(var)2-10
GO:0010259	multicellular organismal aging	0.0556222	-2.88917	1	150	12	0.0229885	522	10917	4.28524e+62	Hsp68,Tpi,Cct1,S6kII,alpha-Man-I,Ilp2,bmm,mld,rb,Ih,mthl2,Sesn
GO:0050795	regulation of behavior	0.0557319	-2.8872	1	72	7	0.01341	522	10917	3.12394e+36	egh,Itp-r83A,p24-1,Ilp2,mld,eca,Ih
GO:1901698	response to nitrogen compound	0.0558686	-2.88475	1	87	8	0.0153257	522	10917	4.28523e+40	Hsp68,moody,Ilp2,CG5189,Ilp3,Ilp6,CG30344,Pvr
GO:0050778	positive regulation of immune response	0.0574987	-2.85599	1	44	5	0.00957854	522	10917	4.09183e+25	Sp7,aub,HBS1,Dredd,Su(var)2-10
GO:1901700	response to oxygen-containing compound	0.0583124	-2.84194	1	201	15	0.0287356	522	10917	4.34284e+75	Pkc98E,Hsp68,moody,Ilp2,CG5189,aay,Arf51F,Ilp3,Ilp6,Pvr,Ggamma30A,CG30344,Gyc-89Da,TotA,dnc
GO:1901615	organic hydroxy compound metabolic process	0.0584979	-2.83876	1	135	11	0.0210728	522	10917	3.22851e+59	IP3K2,Cct1,e,Sp7,Pdh,RhoL,yellow-d,CG9518,Skeletor,yellow-k,mld
GO:0008347	glial cell migration	0.0585547	-2.83779	1	31	4	0.00766284	522	10917	4.23564e+19	bnl,btl,spin,how
GO:0046152	ommochrome metabolic process	0.0595782	-2.82047	1	19	3	0.00574713	522	10917	377244588331381	bw,kar,rb
GO:0007041	lysosomal transport	0.0595782	-2.82047	1	19	3	0.00574713	522	10917	334584538037033	Hrs,spin,fab1
GO:0033060	ocellus pigmentation	0.0595782	-2.82047	1	19	3	0.00574713	522	10917	377244588331381	bw,kar,rb
GO:0008055	ocellus pigment biosynthetic process	0.0595782	-2.82047	1	19	3	0.00574713	522	10917	377244588331381	bw,kar,rb
GO:0006727	ommochrome biosynthetic process	0.0595782	-2.82047	1	19	3	0.00574713	522	10917	377244588331381	bw,kar,rb
GO:0006720	isoprenoid metabolic process	0.0595782	-2.82047	1	19	3	0.00574713	522	10917	428033402439812	Hmgcr,santa-maria,Pdh
GO:0046158	ocellus pigment metabolic process	0.0595782	-2.82047	1	19	3	0.00574713	522	10917	377244588331381	bw,kar,rb
GO:0032989	cellular component morphogenesis	0.0600199	-2.81308	1	782	47	0.0900383	522	10917	40620,47080,39085,43873,35110,32130,39817,37619,31309,31365,45318,34966,35066,38884,45248,39203,33862,42295,39368,39644,33230,34524,37912,33434,5740325,31788,33474,34947,42596,34636,34906,40699,42356,43428,42770,34193,41020,41225,31227,31350,33470,31239,38999,40489,33245,37555,41739	cno,acj6,aay,ras,amos,dy,CG4842,stl,dnc,CG15571,kn,Syx5,Oli,exex,Nckx30C,E(z),CG9175,Ppcs,rols,Aats-gly,rempA,aub,Letm1,Slh,CG42732,Cp38,daw,beat-Ia,how,Rab6,wor,Xe7,bnl,Pkc98E,Irk2,Glt,Mkk4,Mical,gt,lva,colt,egh,Cp15,mael,ds,wrapper,CG3259
GO:1901566	organonitrogen compound biosynthetic process	0.0604113	-2.80658	1	219	16	0.0306513	522	10917	1.17353e+80	Cct1,e,P5CDh2,aay,ras,Gyc-89Da,CRMP,mmy,Adgf-A,Gs1,CG8080,bw,se,Prat2,pug,Ppcs
GO:0035151	regulation of tube size, open tracheal system	0.0622618	-2.77641	1	45	5	0.00957854	522	10917	4.01503e+24	serp,ds,mmy,Mmp1,verm
GO:0007568	aging	0.0627594	-2.76845	1	153	12	0.0229885	522	10917	4.28524e+62	Hsp68,Tpi,Cct1,S6kII,alpha-Man-I,Ilp2,bmm,mld,rb,Ih,mthl2,Sesn
GO:0007264	small GTPase mediated signal transduction	0.0640583	-2.74796	1	121	10	0.0191571	522	10917	4.06204e+52	cno,CRMP,Rgk1,kappaB-Ras,Arf79F,Arf51F,RhoL,f-cup,Rab8,Rab6
GO:0035556	intracellular signal transduction	0.0644113	-2.74247	1	308	21	0.0402299	522	10917	3.17644e+107	Corp,cno,kappaB-Ras,SP555,RhoL,Pvr,Gyc-89Da,Rab6,dnc,Pkc98E,Mkk4,CRMP,Doa,Rgk1,Arf79F,Arf51F,f-cup,Rab8,fab1,PKD,CG31140
GO:0055070	copper ion homeostasis	0.0657268	-2.72225	1	9	2	0.00383142	522	10917	3160134966	Ctr1A,Syx5
GO:0050918	positive chemotaxis	0.0657268	-2.72225	1	9	2	0.00383142	522	10917	4235642803	bnl,Hmgcr
GO:0007205	protein kinase C-activating G-protein coupled receptor signaling pathway	0.0657268	-2.72225	1	9	2	0.00383142	522	10917	3208942836	Sk1,CG31140
GO:0006879	cellular iron ion homeostasis	0.0657268	-2.72225	1	9	2	0.00383142	522	10917	3226038193	Fer3HCH,ABCB7
GO:0006471	protein ADP-ribosylation	0.0657268	-2.72225	1	9	2	0.00383142	522	10917	3669940506	Arf51F,Arf79F
GO:0030722	establishment of oocyte nucleus localization involved in oocyte dorsal/ventral axis specification	0.0657268	-2.72225	1	9	2	0.00383142	522	10917	4048935051	mael,BicD
GO:0042753	positive regulation of circadian rhythm	0.0657268	-2.72225	1	9	2	0.00383142	522	10917	276868536589	mld,Ih
GO:0097065	anterior head development	0.0657268	-2.72225	1	9	2	0.00383142	522	10917	4083545318	Antp,kn
GO:0035288	anterior head segmentation	0.0657268	-2.72225	1	9	2	0.00383142	522	10917	4083545318	Antp,kn
GO:0055082	cellular chemical homeostasis	0.0659411	-2.71899	1	60	6	0.0114943	522	10917	3.84073e+29	ZnT63C,Fer3HCH,Itp-r83A,ABCB7,Ctr1A,Syx5
GO:0008213	protein alkylation	0.067241	-2.69947	1	46	5	0.00957854	522	10917	3.40644e+25	LKR,CG4565,CG32152,ash1,E(z)
GO:0006479	protein methylation	0.067241	-2.69947	1	46	5	0.00957854	522	10917	3.40644e+25	LKR,CG4565,CG32152,ash1,E(z)
GO:0032784	regulation of DNA-templated transcription, elongation	0.0676941	-2.69276	1	20	3	0.00574713	522	10917	414274079042749	Sbf,TfIIFalpha,EloA
GO:0051047	positive regulation of secretion	0.0676941	-2.69276	1	20	3	0.00574713	522	10917	321403505141177	p24-1,BicD,eca
GO:0044281	small molecule metabolic process	0.0696581	-2.66416	1	753	45	0.0862069	522	10917	43582,36624,35667,32625,39085,43873,36760,41192,31309,38147,45783,34594,33172,32858,42803,36020,32416,2768685,41279,37139,42295,117353,40848,32285,42521,39644,34786,39829,43637,40263,42001,40675,14462605,41225,39976,36385,36076,53586,39812,35918,38753,326148,38973,38301,43620	Tpi,CG10131,kappaB-Ras,P5CDh2,aay,ras,ATPCL,CG8417,dnc,CG9149,Aats-val,Pde1c,Gs1,Cyp18a1,Hmgcr,CG1516,CG9518,mld,pug,CG5493,Ppcs,Cct1,alphaTub84B,IP3K2,e,Aats-gly,CAH1,Aats-tyr,CG2246,CG11796,Gyc-89Da,CRMP,Rgk1,Mical,Adgf-A,CG17760,Hdc,Dhap-at,Pdh,CG8080,Prat2,CG31523,se,CG8993,PH4alphaEFB
GO:0055080	cation homeostasis	0.0703329	-2.65452	1	61	6	0.0114943	522	10917	3.84073e+29	ZnT63C,Fer3HCH,Itp-r83A,ABCB7,Ctr1A,Syx5
GO:0055088	lipid homeostasis	0.070747	-2.64865	1	33	4	0.00766284	522	10917	4.06644e+19	Itp-r83A,Ilp2,bmm,Ppcs
GO:0007219	Notch signaling pathway	0.0724351	-2.62506	1	47	5	0.00957854	522	10917	4.06203e+24	cno,wry,pcx,Hs3st-B,aux
GO:0048489	synaptic vesicle transport	0.0733526	-2.61248	1	108	9	0.0172414	522	10917	3.34585e+44	Hrs,spin,Arf79F,aux,Clc,Syx5,Arf51F,BicD,rb
GO:0097480	establishment of synaptic vesicle localization	0.0733526	-2.61248	1	108	9	0.0172414	522	10917	3.34585e+44	Hrs,spin,Arf79F,aux,Clc,Syx5,Arf51F,BicD,rb
GO:0097479	synaptic vesicle localization	0.0733526	-2.61248	1	108	9	0.0172414	522	10917	3.34585e+44	Hrs,spin,Arf79F,aux,Clc,Syx5,Arf51F,BicD,rb
GO:0044711	single-organism biosynthetic process	0.0744185	-2.59805	1	495	31	0.059387	522	10917	3.22851e+158	IP3K2,Cct1,e,kar,P5CDh2,aay,ras,CG2246,yellow-d,Gyc-89Da,CG8417,rb,CRMP,CG2292,mmy,Adgf-A,Gs1,Dhap-at,CG8080,bw,Cyp18a1,Hmgcr,CG1516,Prat2,CG31523,se,santa-maria,yellow-k,pug,mld,Ppcs
GO:0007619	courtship behavior	0.0745464	-2.59633	1	77	7	0.01341	522	10917	3.22453e+34	fne,egh,spin,Gr68a,dnc,aay,Gr32a
GO:0009719	response to endogenous stimulus	0.0748736	-2.59195	1	141	11	0.0210728	522	10917	4.23564e+55	bnl,Hsp68,btl,moody,Ilp2,CG5189,daw,Ilp3,Ilp6,CG30344,Pvr
GO:0046189	phenol-containing compound biosynthetic process	0.0762822	-2.57332	1	21	3	0.00574713	522	10917	377034252139678	yellow-d,e,yellow-k
GO:0010883	regulation of lipid storage	0.0762822	-2.57332	1	21	3	0.00574713	522	10917	405063138139611	Arf79F,rb,bmm
GO:0008286	insulin receptor signaling pathway	0.0762822	-2.57332	1	21	3	0.00574713	522	10917	391513122039150	Ilp3,Ilp6,Ilp2
GO:0051650	establishment of vesicle localization	0.0767578	-2.5671	1	109	9	0.0172414	522	10917	3.34585e+44	Hrs,spin,Arf79F,aux,Clc,Syx5,Arf51F,BicD,rb
GO:0048878	chemical homeostasis	0.0767578	-2.5671	1	109	9	0.0172414	522	10917	4.06644e+44	Itp-r83A,Ilp2,bmm,Syx5,ZnT63C,Fer3HCH,ABCB7,Ctr1A,Ppcs
GO:0055081	anion homeostasis	0.0796242	-2.53044	1	10	2	0.00383142	522	10917	4066442295	Itp-r83A,Ppcs
GO:0051261	protein depolymerization	0.0796242	-2.53044	1	10	2	0.00383142	522	10917	4122540527	Mical,aux
GO:0055072	iron ion homeostasis	0.0796242	-2.53044	1	10	2	0.00383142	522	10917	3226038193	Fer3HCH,ABCB7
GO:0051704	multi-organism process	0.0797859	-2.52841	1	1204	68	0.130268	522	10917	45380,39085,39151,39704,41136,35275,43415,39703,33672,31365,34594,33764,34966,45318,32858,12798279,32245,39701,39368,39150,42752,39700,34894,41943,40133,42596,34636,39710,39273,34581,36699,31239,38999,40489,35762,40527,31011,39709,36619,43873,117365,39324,31309,37619,39991,33458,39564,31789,38129,42803,39708,37755,42295,35927,40848,117353,39707,34524,50133,43385,39271,31788,34127,35051,34545,4117…	spin,aay,Ilp3,Eig71Ed,RhoL,Victoria,Doa,Eig71Ec,Taf12L,CG15571,Pde1c,TotM,Syx5,kn,Cyp18a1,Acp98AB,fne,Eig71Eb,rols,Ilp2,orb,Eig71Ea,yuri,Hel89B,ash1,how,Rab6,Eig71Ei,CG6168,spag4,Arf51F,egh,Cp15,mael,Nup44A,aux,Dredd,Eig71Eh,tra2,ras,HBS1,Gr68a,dnc,stl,CG7408,Hrs,btl,otu,LysP,Hmgcr,Eig71Eg,Sesn,Ppcs,Su(var)2-10,alphaTub84B,Cct1,Eig71Ef,aub,CG13551,Hrb98DE,CG6175,Cp38,Pvr,BicD,Gr32a,eca,mamo,TotA
GO:0007623	circadian rhythm	0.080211	-2.52309	1	94	8	0.0153257	522	10917	3.37054e+41	jet,Ilp3,e,S6kII,Ilp2,mld,Ih,dnc
GO:0051648	vesicle localization	0.0802583	-2.5225	1	110	9	0.0172414	522	10917	3.34585e+44	Hrs,spin,Arf79F,aux,Clc,Syx5,Arf51F,BicD,rb
GO:0007269	neurotransmitter secretion	0.0802583	-2.5225	1	110	9	0.0172414	522	10917	3.34583e+44	Hrs,Frq2,Arf79F,Frq1,Letm1,Clc,Syx5,Arf51F,Sytalpha
GO:0035150	regulation of tube size	0.0834605	-2.48338	1	49	5	0.00957854	522	10917	4.01503e+24	serp,ds,mmy,Mmp1,verm
GO:0010817	regulation of hormone levels	0.0834605	-2.48338	1	49	5	0.00957854	522	10917	3.28583e+26	Cyp18a1,CG9518,E(z),mld,Pdh
GO:0042445	hormone metabolic process	0.0834605	-2.48338	1	49	5	0.00957854	522	10917	3.28583e+26	Cyp18a1,CG9518,E(z),mld,Pdh
GO:0023061	signal release	0.0838542	-2.47868	1	111	9	0.0172414	522	10917	3.34583e+44	Hrs,Frq2,Arf79F,Frq1,Letm1,Clc,Syx5,Arf51F,Sytalpha
GO:0034754	cellular hormone metabolic process	0.0841292	-2.4754	1	35	4	0.00766284	522	10917	3.28583e+21	Cyp18a1,CG9518,mld,Pdh
GO:0071495	cellular response to endogenous stimulus	0.0841321	-2.47537	1	95	8	0.0153257	522	10917	4.23564e+39	bnl,btl,Ilp2,CG5189,daw,Ilp3,Ilp6,Pvr
GO:0071496	cellular response to external stimulus	0.0844939	-2.47108	1	64	6	0.0114943	522	10917	3.22605e+29	Fer3HCH,spin,fab1,TotA,Atg8b,Adgf-A
GO:1901068	guanosine-containing compound metabolic process	0.0844939	-2.47108	1	64	6	0.0114943	522	10917	4.08484e+32	alphaTub84B,ras,Rgk1,kappaB-Ras,Gyc-89Da,CG17760
GO:0070972	protein localization to endoplasmic reticulum	0.0853223	-2.46132	1	22	3	0.00574713	522	10917	390284303434427	Srp68,CG10420,KdelR
GO:0007034	vacuolar transport	0.0853223	-2.46132	1	22	3	0.00574713	522	10917	334584538037033	Hrs,spin,fab1
GO:0015031	protein transport	0.0854504	-2.45982	1	301	20	0.0383142	522	10917	3.73374e+99	CG11110,cbs,Clc,Slh,Rab6,rb,Clbn,Hrs,Doa,Vps26,Syx5,Arf51F,KrT95D,Srp68,Myo10A,Rab8,CG10420,CG9175,CG10144,Nup44A
GO:1902533	positive regulation of intracellular signal transduction	0.0860709	-2.45258	1	128	10	0.0191571	522	10917	4.23564e+51	bnl,btl,CG30456,Mkk4,kn,eIF-4B,Fer3HCH,Hmgcr,Pvr,CG11526
GO:0000022	mitotic spindle elongation	0.0874279	-2.43694	1	80	7	0.01341	522	10917	4.53294e+34	RpL12,RpS16,RpL39,RpL10Ab,Pvr,RpL7,RpL17
GO:0002684	positive regulation of immune system process	0.089287	-2.4159	1	50	5	0.00957854	522	10917	4.09183e+25	Sp7,aub,HBS1,Dredd,Su(var)2-10
GO:0007626	locomotory behavior	0.0904944	-2.40247	1	180	13	0.0249042	522	10917	4.34154e+64	Doa,e,Itp-r83A,S6kII,Ilp2,acj6,jet,Ilp3,Hmgcr,shakB,CCKLR-17D3,Ih,dnc
GO:0016571	histone methylation	0.0912511	-2.39414	1	36	4	0.00766284	522	10917	3.40644e+19	LKR,CG4565,ash1,E(z)
GO:0016325	oocyte microtubule cytoskeleton organization	0.0912511	-2.39414	1	36	4	0.00766284	522	10917	3.12394e+19	egh,mael,BicD,Rab6
GO:1901607	alpha-amino acid biosynthetic process	0.0912511	-2.39414	1	36	4	0.00766284	522	10917	4.12793e+19	pug,Gs1,P5CDh2,aay
GO:0044057	regulation of system process	0.0912511	-2.39414	1	36	4	0.00766284	522	10917	3.60714e+19	KCNQ,how,Ctr1A,rad
GO:0006562	proline catabolic process	0.0933485	-2.37142	1	2	1	0.00191571	522	10917	32625	P5CDh2
GO:0060261	positive regulation of transcription initiation from RNA polymerase II promoter	0.0933485	-2.37142	1	2	1	0.00191571	522	10917	40790	TfIIFalpha
GO:0060297	regulation of sarcomere organization	0.0933485	-2.37142	1	2	1	0.00191571	522	10917	41377	sals
GO:0015886	heme transport	0.0933485	-2.37142	1	2	1	0.00191571	522	10917	38193	ABCB7
GO:0006426	glycyl-tRNA aminoacylation	0.0933485	-2.37142	1	2	1	0.00191571	522	10917	39644	Aats-gly
GO:0048600	oocyte fate commitment	0.0933485	-2.37142	1	2	1	0.00191571	522	10917	40489	mael
GO:0006706	steroid catabolic process	0.0933485	-2.37142	1	2	1	0.00191571	522	10917	32858	Cyp18a1
GO:0035231	cytoneme assembly	0.0933485	-2.37142	1	2	1	0.00191571	522	10917	42356	bnl
GO:1901678	iron coordination entity transport	0.0933485	-2.37142	1	2	1	0.00191571	522	10917	38193	ABCB7
GO:0015866	ADP transport	0.0933485	-2.37142	1	2	1	0.00191571	522	10917	32008	Ant2
GO:1900426	positive regulation of defense response to bacterium	0.0933485	-2.37142	1	2	1	0.00191571	522	10917	42788	CG10157
GO:0006177	GMP biosynthetic process	0.0933485	-2.37142	1	2	1	0.00191571	522	10917	43873	ras
GO:0046470	phosphatidylcholine metabolic process	0.0933485	-2.37142	1	2	1	0.00191571	522	10917	117353	Cct1
GO:0015697	quaternary ammonium group transport	0.0933485	-2.37142	1	2	1	0.00191571	522	10917	33470	colt
GO:0016191	synaptic vesicle uncoating	0.0933485	-2.37142	1	2	1	0.00191571	522	10917	40527	aux
GO:0015838	amino-acid betaine transport	0.0933485	-2.37142	1	2	1	0.00191571	522	10917	33470	colt
GO:1900736	regulation of phospholipase C-activating G-protein coupled receptor signaling pathway	0.0933485	-2.37142	1	2	1	0.00191571	522	10917	42452	Oct-TyrR
GO:0034982	mitochondrial protein processing	0.0933485	-2.37142	1	2	1	0.00191571	522	10917	37337	CG11110
GO:0034249	negative regulation of cellular amide metabolic process	0.0933485	-2.37142	1	2	1	0.00191571	522	10917	36769	casp
GO:2000144	positive regulation of DNA-templated transcription, initiation	0.0933485	-2.37142	1	2	1	0.00191571	522	10917	40790	TfIIFalpha
GO:0060158	phospholipase C-activating dopamine receptor signaling pathway	0.0933485	-2.37142	1	2	1	0.00191571	522	10917	36385	CG17760
GO:0032925	regulation of activin receptor signaling pathway	0.0933485	-2.37142	1	2	1	0.00191571	522	10917	33474	daw
GO:0015867	ATP transport	0.0933485	-2.37142	1	2	1	0.00191571	522	10917	32008	Ant2
GO:0035232	germ cell attraction	0.0933485	-2.37142	1	2	1	0.00191571	522	10917	42803	Hmgcr
GO:0010458	exit from mitosis	0.0933485	-2.37142	1	2	1	0.00191571	522	10917	37808	fzr2
GO:2000370	positive regulation of clathrin-mediated endocytosis	0.0933485	-2.37142	1	2	1	0.00191571	522	10917	35051	BicD
GO:0002806	negative regulation of antimicrobial peptide biosynthetic process	0.0933485	-2.37142	1	2	1	0.00191571	522	10917	36769	casp
GO:0009298	GDP-mannose biosynthetic process	0.0933485	-2.37142	1	2	1	0.00191571	522	10917	41192	CG8417
GO:0003399	cytoneme morphogenesis	0.0933485	-2.37142	1	2	1	0.00191571	522	10917	42356	bnl
GO:0060384	innervation	0.0933485	-2.37142	1	2	1	0.00191571	522	10917	41225	Mical
GO:0071260	cellular response to mechanical stimulus	0.0933485	-2.37142	1	2	1	0.00191571	522	10917	44121	TotA
GO:0051645	Golgi localization	0.0933485	-2.37142	1	2	1	0.00191571	522	10917	31350	lva
GO:0032927	positive regulation of activin receptor signaling pathway	0.0933485	-2.37142	1	2	1	0.00191571	522	10917	33474	daw
GO:0006438	valyl-tRNA aminoacylation	0.0933485	-2.37142	1	2	1	0.00191571	522	10917	45783	Aats-val
GO:0002809	negative regulation of antibacterial peptide biosynthetic process	0.0933485	-2.37142	1	2	1	0.00191571	522	10917	36769	casp
GO:0052803	imidazole-containing compound metabolic process	0.0933485	-2.37142	1	2	1	0.00191571	522	10917	42521	e
GO:0042574	retinal metabolic process	0.0933485	-2.37142	1	2	1	0.00191571	522	10917	39812	Pdh
GO:0006627	protein processing involved in protein targeting to mitochondrion	0.0933485	-2.37142	1	2	1	0.00191571	522	10917	37337	CG11110
GO:0014009	glial cell proliferation	0.0933485	-2.37142	1	2	1	0.00191571	522	10917	40620	cno
GO:0001692	histamine metabolic process	0.0933485	-2.37142	1	2	1	0.00191571	522	10917	42521	e
GO:0044324	regulation of transcription involved in anterior/posterior axis specification	0.0933485	-2.37142	1	2	1	0.00191571	522	10917	31227	gt
GO:0006437	tyrosyl-tRNA aminoacylation	0.0933485	-2.37142	1	2	1	0.00191571	522	10917	39829	Aats-tyr
GO:0003096	renal sodium ion transport	0.0933485	-2.37142	1	2	1	0.00191571	522	10917	33961	Nha1
GO:0001539	cilium or flagellum-dependent cell motility	0.0933485	-2.37142	1	2	1	0.00191571	522	10917	3772382	cp309
GO:0007257	activation of JUN kinase activity	0.0933485	-2.37142	1	2	1	0.00191571	522	10917	41020	Mkk4
GO:0006844	acyl carnitine transport	0.0933485	-2.37142	1	2	1	0.00191571	522	10917	33470	colt
GO:0042248	maintenance of polarity of follicular epithelium	0.0933485	-2.37142	1	2	1	0.00191571	522	10917	31239	egh
GO:0046037	GMP metabolic process	0.0933485	-2.37142	1	2	1	0.00191571	522	10917	43873	ras
GO:0006101	citrate metabolic process	0.0933485	-2.37142	1	2	1	0.00191571	522	10917	36760	ATPCL
GO:0019102	male somatic sex determination	0.0933485	-2.37142	1	2	1	0.00191571	522	10917	36619	tra2
GO:0015879	carnitine transport	0.0933485	-2.37142	1	2	1	0.00191571	522	10917	33470	colt
GO:0002814	negative regulation of biosynthetic process of antibacterial peptides active against Gram-negative bacteria	0.0933485	-2.37142	1	2	1	0.00191571	522	10917	36769	casp
GO:0051683	establishment of Golgi localization	0.0933485	-2.37142	1	2	1	0.00191571	522	10917	31350	lva
GO:0006882	cellular zinc ion homeostasis	0.0933485	-2.37142	1	2	1	0.00191571	522	10917	38407	ZnT63C
GO:0006542	glutamine biosynthetic process	0.0933485	-2.37142	1	2	1	0.00191571	522	10917	33172	Gs1
GO:0055089	fatty acid homeostasis	0.0933485	-2.37142	1	2	1	0.00191571	522	10917	40664	Itp-r83A
GO:0040009	regulation of growth rate	0.0933485	-2.37142	1	2	1	0.00191571	522	10917	39150	Ilp2
GO:0071244	cellular response to carbon dioxide	0.0933485	-2.37142	1	2	1	0.00191571	522	10917	45234	Ggamma30A
GO:0006408	snRNA export from nucleus	0.0933485	-2.37142	1	2	1	0.00191571	522	10917	35926	Phax
GO:1900738	positive regulation of phospholipase C-activating G-protein coupled receptor signaling pathway	0.0933485	-2.37142	1	2	1	0.00191571	522	10917	42452	Oct-TyrR
GO:0051030	snRNA transport	0.0933485	-2.37142	1	2	1	0.00191571	522	10917	35926	Phax
GO:0072319	vesicle uncoating	0.0933485	-2.37142	1	2	1	0.00191571	522	10917	40527	aux
GO:0010738	regulation of protein kinase A signaling	0.0933485	-2.37142	1	2	1	0.00191571	522	10917	31309	dnc
GO:0035095	behavioral response to nicotine	0.0933485	-2.37142	1	2	1	0.00191571	522	10917	31168	moody
GO:0008340	determination of adult lifespan	0.0938953	-2.36558	1	147	11	0.0210728	522	10917	4.28524e+57	Hsp68,Tpi,Cct1,S6kII,alpha-Man-I,Ilp2,bmm,mld,rb,Ih,mthl2
GO:0009113	purine nucleobase biosynthetic process	0.0943296	-2.36096	1	11	2	0.00383142	522	10917	3875339976	Prat2,Adgf-A
GO:0000301	retrograde transport, vesicle recycling within Golgi	0.0943296	-2.36096	1	11	2	0.00383142	522	10917	4284336492	KrT95D,cbs
GO:0030237	female sex determination	0.0943296	-2.36096	1	11	2	0.00383142	522	10917	3661931789	tra2,otu
GO:0009712	catechol-containing compound metabolic process	0.0943296	-2.36096	1	11	2	0.00383142	522	10917	425213772559	e,Skeletor
GO:0008543	fibroblast growth factor receptor signaling pathway	0.0943296	-2.36096	1	11	2	0.00383142	522	10917	4235639564	bnl,btl
GO:0002027	regulation of heart rate	0.0943296	-2.36096	1	11	2	0.00383142	522	10917	3607131601	KCNQ,Ctr1A
GO:0044344	cellular response to fibroblast growth factor stimulus	0.0943296	-2.36096	1	11	2	0.00383142	522	10917	4235639564	bnl,btl
GO:0050714	positive regulation of protein secretion	0.0943296	-2.36096	1	11	2	0.00383142	522	10917	3214041177	p24-1,eca
GO:0030308	negative regulation of cell growth	0.0943296	-2.36096	1	11	2	0.00383142	522	10917	3956437755	btl,Sesn
GO:0010529	negative regulation of transposition	0.0943296	-2.36096	1	11	2	0.00383142	522	10917	4048934524	mael,aub
GO:0006721	terpenoid metabolic process	0.0943296	-2.36096	1	11	2	0.00383142	522	10917	3402439812	santa-maria,Pdh
GO:0006890	retrograde vesicle-mediated transport, Golgi to ER	0.0943296	-2.36096	1	11	2	0.00383142	522	10917	3390834427	epsilonCOP,KdelR
GO:0071774	response to fibroblast growth factor	0.0943296	-2.36096	1	11	2	0.00383142	522	10917	4235639564	bnl,btl
GO:0043455	regulation of secondary metabolic process	0.0943296	-2.36096	1	11	2	0.00383142	522	10917	4252140918	e,Sp7
GO:0031427	response to methotrexate	0.0943296	-2.36096	1	11	2	0.00383142	522	10917	42852246552	Hsp68,CG30344
GO:0000042	protein targeting to Golgi	0.0943296	-2.36096	1	11	2	0.00383142	522	10917	4284336492	KrT95D,cbs
GO:0072600	establishment of protein localization to Golgi	0.0943296	-2.36096	1	11	2	0.00383142	522	10917	4284336492	KrT95D,cbs
GO:0034067	protein localization to Golgi apparatus	0.0943296	-2.36096	1	11	2	0.00383142	522	10917	4284336492	KrT95D,cbs
GO:2000274	regulation of epithelial cell migration, open tracheal system	0.0943296	-2.36096	1	11	2	0.00383142	522	10917	4235633458	bnl,Hrs
GO:0006584	catecholamine metabolic process	0.0943296	-2.36096	1	11	2	0.00383142	522	10917	425213772559	e,Skeletor
GO:0006732	coenzyme metabolic process	0.0947461	-2.35655	1	66	6	0.0114943	522	10917	3.59184e+29	CG8080,ATPCL,Hmgcr,Mical,pug,Ppcs
GO:0009112	nucleobase metabolic process	0.0947926	-2.35606	1	23	3	0.00574713	522	10917	406753875339976	CRMP,Prat2,Adgf-A
GO:0031334	positive regulation of protein complex assembly	0.0947926	-2.35606	1	23	3	0.00574713	522	10917	326964137740790	Arpc3B,sals,TfIIFalpha
GO:0046427	positive regulation of JAK-STAT cascade	0.0947926	-2.35606	1	23	3	0.00574713	522	10917	3.35504e+16	eIF-4B,Fer3HCH,kn
GO:0048067	cuticle pigmentation	0.0947926	-2.35606	1	23	3	0.00574713	522	10917	377034252139678	yellow-d,e,yellow-k
GO:0045214	sarcomere organization	0.0947926	-2.35606	1	23	3	0.00574713	522	10917	412253936842596	Mical,rols,how
GO:0051231	spindle elongation	0.0966737	-2.33641	1	82	7	0.01341	522	10917	4.53294e+34	RpL12,RpS16,RpL39,RpL10Ab,Pvr,RpL7,RpL17
GO:0006886	intracellular protein transport	0.0970133	-2.33291	1	217	15	0.0287356	522	10917	3.34584e+74	Hrs,CG11110,cbs,Vps26,Clc,Slh,Syx5,KrT95D,Myo10A,Srp68,CG10420,rb,Clbn,Nup44A,CG10144
GO:0007167	enzyme linked receptor protein signaling pathway	0.0971943	-2.33104	1	165	12	0.0229885	522	10917	4.23564e+59	bnl,btl,Hrs,gt,Ilp2,daw,Ilp3,Ilp6,Pvr,Nup44A,fus,CG10702
GO:0071705	nitrogen compound transport	0.0973249	-2.3297	1	148	11	0.0210728	522	10917	4.35644e+55	RpS28a,CG13248,colt,Phax,Nxf3,egh,CG9444,CG8850,ABCB7,BicD,Ant2
GO:0007419	ventral cord development	0.0986506	-2.31617	1	37	4	0.00766284	522	10917	3.10033e+19	vnd,l(1)sc,moody,Pvr
GO:0006152	purine nucleoside catabolic process	0.100111	-2.30147	1	67	6	0.0114943	522	10917	4.08481e+32	alphaTub84B,Rgk1,kappaB-Ras,Gyc-89Da,Adgf-A,CG17760
GO:0046130	purine ribonucleoside catabolic process	0.100111	-2.30147	1	67	6	0.0114943	522	10917	4.08481e+32	alphaTub84B,Rgk1,kappaB-Ras,Gyc-89Da,Adgf-A,CG17760
GO:0034605	cellular response to heat	0.104671	-2.25694	1	24	3	0.00574713	522	10917	352754412133764	Victoria,TotA,TotM
GO:0000041	transition metal ion transport	0.104671	-2.25694	1	24	3	0.00574713	522	10917	384073226031601	ZnT63C,Fer3HCH,Ctr1A
GO:0042391	regulation of membrane potential	0.104671	-2.25694	1	24	3	0.00574713	522	10917	427704066434636	Irk2,Itp-r83A,Rab6
GO:0072523	purine-containing compound catabolic process	0.105634	-2.24778	1	68	6	0.0114943	522	10917	4.08484e+32	alphaTub84B,kappaB-Ras,Rgk1,Gyc-89Da,CG17760,Adgf-A
GO:0018958	phenol-containing compound metabolic process	0.105634	-2.24778	1	68	6	0.0114943	522	10917	4.11364e+31	RhoL,yellow-d,e,Skeletor,Sp7,yellow-k
GO:0032483	regulation of Rab protein signal transduction	0.10632	-2.2413	1	38	4	0.00766284	522	10917	4.19604e+19	CG5916,Sbf,CG18659,CG6182
GO:0001505	regulation of neurotransmitter levels	0.107424	-2.23097	1	117	9	0.0172414	522	10917	3.34583e+44	Hrs,Frq2,Arf79F,Frq1,Letm1,Clc,Syx5,Arf51F,Sytalpha
GO:0006836	neurotransmitter transport	0.108184	-2.22392	1	134	10	0.0191571	522	10917	3.34583e+49	Hrs,Frq2,Arf79F,Letm1,Frq1,Clc,Syx5,Arf51F,Sytalpha,CG8850
GO:0006662	glycerol ether metabolic process	0.109734	-2.20969	1	12	2	0.00383142	522	10917	3830153586	CG8993,Dhap-at
GO:0007200	phospholipase C-activating G-protein coupled receptor signaling pathway	0.109734	-2.20969	1	12	2	0.00383142	522	10917	4066436385	Itp-r83A,CG17760
GO:0061327	anterior Malpighian tubule development	0.109734	-2.20969	1	12	2	0.00383142	522	10917	3936834127	rols,Pvr
GO:0010528	regulation of transposition	0.109734	-2.20969	1	12	2	0.00383142	522	10917	4048934524	mael,aub
GO:0010632	regulation of epithelial cell migration	0.109734	-2.20969	1	12	2	0.00383142	522	10917	4235633458	bnl,Hrs
GO:0034644	cellular response to UV	0.109734	-2.20969	1	12	2	0.00383142	522	10917	3527544121	Victoria,TotA
GO:0048042	regulation of post-mating oviposition	0.109734	-2.20969	1	12	2	0.00383142	522	10917	3214041177	p24-1,eca
GO:0006739	NADP metabolic process	0.109734	-2.20969	1	12	2	0.00383142	522	10917	3591841225	CG8080,Mical
GO:0018904	ether metabolic process	0.109734	-2.20969	1	12	2	0.00383142	522	10917	3830153586	CG8993,Dhap-at
GO:0043408	regulation of MAPK cascade	0.109971	-2.20754	1	101	8	0.0153257	522	10917	4.23564e+41	bnl,btl,Mkk4,Mkp,cno,Hmgcr,Pvr,CG11526
GO:0043410	positive regulation of MAPK cascade	0.111311	-2.19543	1	69	6	0.0114943	522	10917	4.23564e+29	bnl,btl,Mkk4,Hmgcr,Pvr,CG11526
GO:0045184	establishment of protein localization	0.114184	-2.16995	1	313	20	0.0383142	522	10917	3.73374e+99	CG11110,cbs,Clc,Slh,Rab6,rb,Clbn,Hrs,Doa,Vps26,Syx5,Arf51F,KrT95D,Srp68,Myo10A,Rab8,CG10420,CG9175,CG10144,Nup44A
GO:0090066	regulation of anatomical structure size	0.114366	-2.16835	1	170	12	0.0229885	522	10917	4.01504e+59	serp,btl,sals,gt,mmy,Ilp2,Mmp1,verm,Syx5,Arpc3B,Hs3st-B,ds
GO:0042692	muscle cell differentiation	0.114657	-2.16581	1	102	8	0.0153257	522	10917	4.35824e+39	Tpi,rols,l(1)sc,Mical,Antp,kn,Arf51F,how
GO:0048070	regulation of developmental pigmentation	0.114933	-2.1634	1	25	3	0.00574713	522	10917	410204252133139	Mkk4,e,S6kII
GO:0002786	regulation of antibacterial peptide production	0.114933	-2.1634	1	25	3	0.00574713	522	10917	367694194331011	casp,Hel89B,Dredd
GO:0002808	regulation of antibacterial peptide biosynthetic process	0.114933	-2.1634	1	25	3	0.00574713	522	10917	367694194331011	casp,Hel89B,Dredd
GO:0000902	cell morphogenesis	0.11535	-2.15978	1	670	39	0.0747126	522	10917	4.06205e+196	cno,acj6,aay,ras,amos,dy,CG4842,stl,dnc,Syx5,Oli,kn,exex,Nckx30C,E(z),CG9175,Ppcs,Aats-gly,rempA,CG42732,Slh,daw,beat-Ia,Rab6,wor,Xe7,bnl,Pkc98E,Irk2,Glt,Mkk4,Mical,gt,lva,colt,egh,ds,wrapper,CG3259
GO:0032270	positive regulation of cellular protein metabolic process	0.116712	-2.14805	1	86	7	0.01341	522	10917	4.23564e+34	bnl,btl,Hrs,Mkk4,aub,Hrb98DE,orb
GO:0009164	nucleoside catabolic process	0.11714	-2.14439	1	70	6	0.0114943	522	10917	4.08481e+32	alphaTub84B,Rgk1,kappaB-Ras,Gyc-89Da,Adgf-A,CG17760
GO:0042454	ribonucleoside catabolic process	0.11714	-2.14439	1	70	6	0.0114943	522	10917	4.08481e+32	alphaTub84B,Rgk1,kappaB-Ras,Gyc-89Da,Adgf-A,CG17760
GO:0060179	male mating behavior	0.11714	-2.14439	1	70	6	0.0114943	522	10917	3.22453e+29	fne,egh,Pde1c,Gr68a,aay,Gr32a
GO:0048134	germ-line cyst formation	0.125557	-2.075	1	26	3	0.00574713	522	10917	350513178942752	BicD,otu,orb
GO:0045860	positive regulation of protein kinase activity	0.125557	-2.075	1	26	3	0.00574713	522	10917	423563956441020	bnl,btl,Mkk4
GO:0033674	positive regulation of kinase activity	0.125557	-2.075	1	26	3	0.00574713	522	10917	423563956441020	bnl,btl,Mkk4
GO:0046068	cGMP metabolic process	0.125738	-2.07355	1	13	2	0.00383142	522	10917	3459442001	Pde1c,Gyc-89Da
GO:0071804	cellular potassium ion transport	0.125738	-2.07355	1	13	2	0.00383142	522	10917	422228674091	CG10864,CG42594
GO:0014019	neuroblast development	0.125738	-2.07355	1	13	2	0.00383142	522	10917	3100340835	vnd,Antp
GO:0006892	post-Golgi vesicle-mediated transport	0.125738	-2.07355	1	13	2	0.00383142	522	10917	3214040506	p24-1,Arf79F
GO:0071805	potassium ion transmembrane transport	0.125738	-2.07355	1	13	2	0.00383142	522	10917	422228674091	CG10864,CG42594
GO:0048082	regulation of adult chitin-containing cuticle pigmentation	0.125738	-2.07355	1	13	2	0.00383142	522	10917	4102042521	Mkk4,e
GO:0002813	regulation of biosynthetic process of antibacterial peptides active against Gram-negative bacteria	0.125738	-2.07355	1	13	2	0.00383142	522	10917	3676931011	casp,Dredd
GO:0006641	triglyceride metabolic process	0.125738	-2.07355	1	13	2	0.00383142	522	10917	3335439611	CG17646,bmm
GO:0009084	glutamine family amino acid biosynthetic process	0.125738	-2.07355	1	13	2	0.00383142	522	10917	3317232625	Gs1,P5CDh2
GO:0007029	endoplasmic reticulum organization	0.125738	-2.07355	1	13	2	0.00383142	522	10917	3413431204	wol,pcx
GO:0006184	GTP catabolic process	0.128426	-2.0524	1	56	5	0.00957854	522	10917	4.08481e+27	alphaTub84B,Rgk1,kappaB-Ras,Gyc-89Da,CG17760
GO:0045088	regulation of innate immune response	0.129245	-2.04604	1	72	6	0.0114943	522	10917	3.86484e+30	scny,Sp7,aub,HBS1,Dredd,Su(var)2-10
GO:0019094	pole plasm mRNA localization	0.130855	-2.03366	1	41	4	0.00766284	522	10917	4.04893e+19	mael,aub,Rab6,orb
GO:0035152	regulation of tube architecture, open tracheal system	0.135515	-1.99867	1	73	6	0.0114943	522	10917	4.23564e+29	bnl,serp,ds,mmy,Mmp1,verm
GO:1901701	cellular response to oxygen-containing compound	0.135515	-1.99867	1	73	6	0.0114943	522	10917	3.91513e+29	Ilp3,Ilp6,Pvr,Ggamma30A,Ilp2,CG5189
GO:0050684	regulation of mRNA processing	0.135515	-1.99867	1	73	6	0.0114943	522	10917	3.66194e+31	tra2,Doa,how,aub,AGO3,Hrb98DE
GO:0006582	melanin metabolic process	0.135606	-1.998	1	57	5	0.00957854	522	10917	4.11364e+24	RhoL,yellow-d,e,Sp7,yellow-k
GO:0051503	adenine nucleotide transport	0.136708	-1.98991	1	3	1	0.00191571	522	10917	32008	Ant2
GO:0006407	rRNA export from nucleus	0.136708	-1.98991	1	3	1	0.00191571	522	10917	43564	RpS28a
GO:0046594	maintenance of pole plasm mRNA location	0.136708	-1.98991	1	3	1	0.00191571	522	10917	34524	aub
GO:0006857	oligopeptide transport	0.136708	-1.98991	1	3	1	0.00191571	522	10917	41175	CG9444
GO:0032958	inositol phosphate biosynthetic process	0.136708	-1.98991	1	3	1	0.00191571	522	10917	32285	IP3K2
GO:0006723	cuticle hydrocarbon biosynthetic process	0.136708	-1.98991	1	3	1	0.00191571	522	10917	39203	E(z)
GO:2000105	positive regulation of DNA-dependent DNA replication	0.136708	-1.98991	1	3	1	0.00191571	522	10917	31789	otu
GO:0008611	ether lipid biosynthetic process	0.136708	-1.98991	1	3	1	0.00191571	522	10917	53586	Dhap-at
GO:0022617	extracellular matrix disassembly	0.136708	-1.98991	1	3	1	0.00191571	522	10917	37949	Mmp1
GO:0018149	peptide cross-linking	0.136708	-1.98991	1	3	1	0.00191571	522	10917	33245	ds
GO:0051283	negative regulation of sequestering of calcium ion	0.136708	-1.98991	1	3	1	0.00191571	522	10917	40664	Itp-r83A
GO:1902805	positive regulation of synaptic vesicle transport	0.136708	-1.98991	1	3	1	0.00191571	522	10917	35051	BicD
GO:0043122	regulation of I-kappaB kinase/NF-kappaB signaling	0.136708	-1.98991	1	3	1	0.00191571	522	10917	35667	kappaB-Ras
GO:0016101	diterpenoid metabolic process	0.136708	-1.98991	1	3	1	0.00191571	522	10917	39812	Pdh
GO:0048086	negative regulation of developmental pigmentation	0.136708	-1.98991	1	3	1	0.00191571	522	10917	33139	S6kII
GO:0034769	basement membrane disassembly	0.136708	-1.98991	1	3	1	0.00191571	522	10917	37949	Mmp1
GO:0034969	histone arginine methylation	0.136708	-1.98991	1	3	1	0.00191571	522	10917	34064	LKR
GO:0007383	specification of segmental identity, antennal segment	0.136708	-1.98991	1	3	1	0.00191571	522	10917	40835	Antp
GO:0019673	GDP-mannose metabolic process	0.136708	-1.98991	1	3	1	0.00191571	522	10917	41192	CG8417
GO:0046503	glycerolipid catabolic process	0.136708	-1.98991	1	3	1	0.00191571	522	10917	39611	bmm
GO:2000300	regulation of synaptic vesicle exocytosis	0.136708	-1.98991	1	3	1	0.00191571	522	10917	35051	BicD
GO:0030322	stabilization of membrane potential	0.136708	-1.98991	1	3	1	0.00191571	522	10917	40664	Itp-r83A
GO:0090176	microtubule cytoskeleton organization involved in establishment of planar polarity	0.136708	-1.98991	1	3	1	0.00191571	522	10917	33245	ds
GO:0032877	positive regulation of DNA endoreduplication	0.136708	-1.98991	1	3	1	0.00191571	522	10917	31789	otu
GO:2000369	regulation of clathrin-mediated endocytosis	0.136708	-1.98991	1	3	1	0.00191571	522	10917	35051	BicD
GO:0001556	oocyte maturation	0.136708	-1.98991	1	3	1	0.00191571	522	10917	34524	aub
GO:0046461	neutral lipid catabolic process	0.136708	-1.98991	1	3	1	0.00191571	522	10917	39611	bmm
GO:0034308	primary alcohol metabolic process	0.136708	-1.98991	1	3	1	0.00191571	522	10917	39812	Pdh
GO:0032861	activation of Rap GTPase activity	0.136708	-1.98991	1	3	1	0.00191571	522	10917	32253	rad
GO:0007384	specification of segmental identity, thorax	0.136708	-1.98991	1	3	1	0.00191571	522	10917	40835	Antp
GO:0030238	male sex determination	0.136708	-1.98991	1	3	1	0.00191571	522	10917	36619	tra2
GO:0061060	negative regulation of peptidoglycan recognition protein signaling pathway	0.136708	-1.98991	1	3	1	0.00191571	522	10917	36769	casp
GO:0006642	triglyceride mobilization	0.136708	-1.98991	1	3	1	0.00191571	522	10917	39611	bmm
GO:0046689	response to mercury ion	0.136708	-1.98991	1	3	1	0.00191571	522	10917	44121	TotA
GO:0006741	NADP biosynthetic process	0.136708	-1.98991	1	3	1	0.00191571	522	10917	35918	CG8080
GO:0001661	conditioned taste aversion	0.136708	-1.98991	1	3	1	0.00191571	522	10917	31309	dnc
GO:0006534	cysteine metabolic process	0.136708	-1.98991	1	3	1	0.00191571	522	10917	37139	CG5493
GO:0035434	copper ion transmembrane transport	0.136708	-1.98991	1	3	1	0.00191571	522	10917	31601	Ctr1A
GO:0051037	regulation of transcription during meiosis	0.136708	-1.98991	1	3	1	0.00191571	522	10917	33779	tomb
GO:0001523	retinoid metabolic process	0.136708	-1.98991	1	3	1	0.00191571	522	10917	39812	Pdh
GO:0050802	circadian sleep/wake cycle, sleep	0.136708	-1.98991	1	3	1	0.00191571	522	10917	36589	Ih
GO:0030517	negative regulation of axon extension	0.136708	-1.98991	1	3	1	0.00191571	522	10917	39564	btl
GO:0046485	ether lipid metabolic process	0.136708	-1.98991	1	3	1	0.00191571	522	10917	53586	Dhap-at
GO:0006035	cuticle chitin biosynthetic process	0.136708	-1.98991	1	3	1	0.00191571	522	10917	33903	mmy
GO:0006208	pyrimidine nucleobase catabolic process	0.136708	-1.98991	1	3	1	0.00191571	522	10917	40675	CRMP
GO:0007252	I-kappaB phosphorylation	0.136708	-1.98991	1	3	1	0.00191571	522	10917	43428	Pkc98E
GO:0006564	L-serine biosynthetic process	0.136708	-1.98991	1	3	1	0.00191571	522	10917	39085	aay
GO:0070734	histone H3-K27 methylation	0.136708	-1.98991	1	3	1	0.00191571	522	10917	39203	E(z)
GO:0007381	specification of segmental identity, labial segment	0.136708	-1.98991	1	3	1	0.00191571	522	10917	31227	gt
GO:0046504	glycerol ether biosynthetic process	0.136708	-1.98991	1	3	1	0.00191571	522	10917	53586	Dhap-at
GO:0046464	acylglycerol catabolic process	0.136708	-1.98991	1	3	1	0.00191571	522	10917	39611	bmm
GO:0019433	triglyceride catabolic process	0.136708	-1.98991	1	3	1	0.00191571	522	10917	39611	bmm
GO:0042683	negative regulation of compound eye cone cell fate specification	0.136708	-1.98991	1	3	1	0.00191571	522	10917	33139	S6kII
GO:0097384	cellular lipid biosynthetic process	0.136708	-1.98991	1	3	1	0.00191571	522	10917	53586	Dhap-at
GO:1901503	ether biosynthetic process	0.136708	-1.98991	1	3	1	0.00191571	522	10917	53586	Dhap-at
GO:0006621	protein retention in ER lumen	0.136708	-1.98991	1	3	1	0.00191571	522	10917	34427	KdelR
GO:0035437	maintenance of protein localization in endoplasmic reticulum	0.136708	-1.98991	1	3	1	0.00191571	522	10917	34427	KdelR
GO:0051039	positive regulation of transcription during meiosis	0.136708	-1.98991	1	3	1	0.00191571	522	10917	33779	tomb
GO:0032924	activin receptor signaling pathway	0.136708	-1.98991	1	3	1	0.00191571	522	10917	33474	daw
GO:0030951	establishment or maintenance of microtubule cytoskeleton polarity	0.139511	-1.96961	1	42	4	0.00766284	522	10917	3.12394e+19	egh,mael,Rab6,BicD
GO:0007316	pole plasm RNA localization	0.139511	-1.96961	1	42	4	0.00766284	522	10917	4.04893e+19	mael,aub,Rab6,orb
GO:0043038	amino acid activation	0.139511	-1.96961	1	42	4	0.00766284	522	10917	3.98294e+19	Aats-tyr,Aats-gly,e,Aats-val
GO:1903311	regulation of mRNA metabolic process	0.141926	-1.95245	1	74	6	0.0114943	522	10917	3.66194e+31	tra2,Doa,how,aub,AGO3,Hrb98DE
GO:1901658	glycosyl compound catabolic process	0.141926	-1.95245	1	74	6	0.0114943	522	10917	4.08484e+32	alphaTub84B,kappaB-Ras,Rgk1,Gyc-89Da,CG17760,Adgf-A
GO:0046011	regulation of oskar mRNA translation	0.142249	-1.95018	1	14	2	0.00383142	522	10917	3452442752	aub,orb
GO:0006901	vesicle coating	0.142249	-1.95018	1	14	2	0.00383142	522	10917	3138140221	rb,Clc
GO:0007564	regulation of chitin-based cuticle tanning	0.142249	-1.95018	1	14	2	0.00383142	522	10917	4102042521	Mkk4,e
GO:2000736	regulation of stem cell differentiation	0.142249	-1.95018	1	14	2	0.00383142	522	10917	3864840506	scny,Arf79F
GO:0016183	synaptic vesicle coating	0.142249	-1.95018	1	14	2	0.00383142	522	10917	3138140221	rb,Clc
GO:1901069	guanosine-containing compound catabolic process	0.14296	-1.94519	1	58	5	0.00957854	522	10917	4.08481e+27	alphaTub84B,Rgk1,kappaB-Ras,Gyc-89Da,CG17760
GO:0009203	ribonucleoside triphosphate catabolic process	0.14296	-1.94519	1	58	5	0.00957854	522	10917	4.08481e+27	alphaTub84B,Rgk1,kappaB-Ras,Gyc-89Da,CG17760
GO:0009146	purine nucleoside triphosphate catabolic process	0.14296	-1.94519	1	58	5	0.00957854	522	10917	4.08481e+27	alphaTub84B,Rgk1,kappaB-Ras,Gyc-89Da,CG17760
GO:0009207	purine ribonucleoside triphosphate catabolic process	0.14296	-1.94519	1	58	5	0.00957854	522	10917	4.08481e+27	alphaTub84B,Rgk1,kappaB-Ras,Gyc-89Da,CG17760
GO:0007165	signal transduction	0.144036	-1.93769	1	938	52	0.0996169	522	10917	31764,40620,35667,37883,40527,31011,32089,34572,53471,39151,41136,31220,32918,33062,35181,31309,39564,33458,43415,31204,40664,34594,42452,37033,34024,32864,42836,39150,33474,41943,34127,45234,42001,34636,42356,43428,41020,40675,14462605,31168,40506,31227,36385,33248,36699,41677,40168,33361,42203,38636,35762,44095	Corp,cno,kappaB-Ras,CG13575,aux,Dredd,Sk1,spz4,SP555,Ilp3,RhoL,Ilp6,Hs3st-B,shakB,CG10702,dnc,btl,Hrs,Doa,pcx,Itp-r83A,Pde1c,Oct-TyrR,fab1,santa-maria,CCKLR-17D3,CG31140,Ilp2,daw,Hel89B,Pvr,Ggamma30A,Gyc-89Da,Rab6,bnl,Pkc98E,Mkk4,CRMP,Rgk1,moody,Arf79F,gt,CG17760,GABA-B-R3,Arf51F,f-cup,Rab8,wry,PKD,mthl2,Nup44A,fus
GO:0051247	positive regulation of protein metabolic process	0.144535	-1.93423	1	91	7	0.01341	522	10917	4.23564e+34	bnl,btl,Hrs,Mkk4,aub,Hrb98DE,orb
GO:1901564	organonitrogen compound metabolic process	0.147781	-1.91202	1	706	40	0.0766284	522	10917	4.01504e+208	serp,kappaB-Ras,P5CDh2,verm,aay,Sk1,ras,Mur89F,Aats-val,Pde1c,mmy,Gs1,bw,Hmgcr,Skeletor,CG32284,pug,CG5493,Ppcs,Cct1,alphaTub84B,e,Aats-gly,Aats-tyr,CG11796,obst-H,Gyc-89Da,CRMP,Mical,Rgk1,PGRP-SB2,Adgf-A,CG12009,CG17760,Hdc,CG8080,CG42494,se,Prat2,PH4alphaEFB
GO:0051347	positive regulation of transferase activity	0.147791	-1.91196	1	28	3	0.00574713	522	10917	423563956441020	bnl,btl,Mkk4
GO:0045455	ecdysteroid metabolic process	0.147791	-1.91196	1	28	3	0.00574713	522	10917	3.28583e+16	Cyp18a1,CG9518,mld
GO:0035287	head segmentation	0.147791	-1.91196	1	28	3	0.00574713	522	10917	312274083545318	gt,Antp,kn
GO:0007379	segment specification	0.148389	-1.90792	1	43	4	0.00766284	522	10917	3.41343e+19	wol,gt,Antp,kn
GO:0046425	regulation of JAK-STAT cascade	0.148389	-1.90792	1	43	4	0.00766284	522	10917	3.35504e+21	eIF-4B,Fer3HCH,Su(var)2-10,kn
GO:0071900	regulation of protein serine/threonine kinase activity	0.148389	-1.90792	1	43	4	0.00766284	522	10917	4.23564e+21	bnl,btl,Mkk4,Mkp
GO:0051186	cofactor metabolic process	0.148474	-1.90734	1	75	6	0.0114943	522	10917	3.59184e+29	CG8080,ATPCL,Hmgcr,Mical,pug,Ppcs
GO:0080134	regulation of response to stress	0.149604	-1.89976	1	197	13	0.0249042	522	10917	3.67694e+65	casp,Mkk4,cno,Pino,scny,Sp7,aub,Dredd,Hel89B,HBS1,CG10157,Su(var)2-10,Sesn
GO:0031667	response to nutrient levels	0.150364	-1.8947	1	109	8	0.0153257	522	10917	4.28525e+39	Hsp68,spin,Itp-r83A,Adgf-A,Fer3HCH,fab1,Ih,Atg8b
GO:0009143	nucleoside triphosphate catabolic process	0.150483	-1.8939	1	59	5	0.00957854	522	10917	4.08481e+27	alphaTub84B,Rgk1,kappaB-Ras,Gyc-89Da,CG17760
GO:0009267	cellular response to starvation	0.150483	-1.8939	1	59	5	0.00957854	522	10917	3.22605e+24	Fer3HCH,spin,fab1,Atg8b,Adgf-A
GO:0009261	ribonucleotide catabolic process	0.150483	-1.8939	1	59	5	0.00957854	522	10917	4.08481e+27	alphaTub84B,Rgk1,kappaB-Ras,Gyc-89Da,CG17760
GO:0009154	purine ribonucleotide catabolic process	0.150483	-1.8939	1	59	5	0.00957854	522	10917	4.08481e+27	alphaTub84B,Rgk1,kappaB-Ras,Gyc-89Da,CG17760
GO:0006195	purine nucleotide catabolic process	0.150483	-1.8939	1	59	5	0.00957854	522	10917	4.08481e+27	alphaTub84B,Rgk1,kappaB-Ras,Gyc-89Da,CG17760
GO:0009058	biosynthetic process	0.151011	-1.8904	1	1139	62	0.118774	522	10917	37580,41343,38374,43424,39301,34503,42749,45883,32625,39085,32635,43873,36760,117365,41192,43564,37849,39338,45783,33672,33903,33172,37724,32858,42803,36020,39203,34024,2768685,41279,39678,42295,32285,117353,42521,39644,31957,31613,3355041,39829,43637,37703,42001,31381,45329,40675,40790,39518,36049,40506,34352,39976,53586,34134,35918,36699,38180,38753,326148,38973,38193,36570	RpS16,RpS25,CG1291,Ssl2,CG7368,Dnz1,EloA,kar,P5CDh2,aay,RpS19a,ras,ATPCL,HBS1,CG8417,RpS28a,RpL39,RpL10Ab,Aats-val,Taf12L,mmy,Gs1,bw,Cyp18a1,Hmgcr,CG1516,E(z),santa-maria,mld,pug,yellow-k,Ppcs,IP3K2,Cct1,e,Aats-gly,alpha-Man-I,RpL17,eIF-4B,Aats-tyr,CG2246,yellow-d,Gyc-89Da,rb,RpL12,CRMP,TfIIFalpha,stv,CG2292,Arf79F,RpL7,Adgf-A,Dhap-at,wol,CG8080,Arf51F,Cct2,Prat2,CG31523,se,ABCB7,mRpS16
GO:0007154	cell communication	0.152296	-1.88193	1	1418	76	0.145594	522	10917	31764,40620,45380,39151,41136,31220,33062,35181,33438,41037,43415,40664,34594,42452,45318,34966,32032,34024,32864,42836,32799,39150,37912,40221,41943,45234,34636,31381,34906,43428,40675,39518,31168,31227,39976,36385,33248,36699,32260,40168,42203,38636,35762,44095,35667,40761,34503,37883,40527,31011,32089,34572,53471,32918,31309,33458,39564,31204,38884,35068,37033,32416,42473,32797,33474,34127,350…	Corp,cno,spin,Ilp3,RhoL,Ilp6,shakB,CG10702,Cyp309a1,CG8136,Doa,Itp-r83A,Pde1c,Oct-TyrR,kn,Syx5,C901,santa-maria,CCKLR-17D3,CG31140,Frq2,Ilp2,Letm1,Clc,Hel89B,Ggamma30A,Rab6,rb,wor,Pkc98E,CRMP,stv,moody,gt,Adgf-A,CG17760,GABA-B-R3,Arf51F,Fer3HCH,Rab8,PKD,mthl2,Nup44A,fus,kappaB-Ras,Osi7,Dnz1,CG13575,aux,Dredd,Sk1,spz4,SP555,Hs3st-B,dnc,Hrs,btl,pcx,exex,Sytalpha,fab1,CG9518,CG3822,Frq1,daw,Pvr,BicD…
GO:0007166	cell surface receptor signaling pathway	0.153384	-1.87481	1	535	31	0.059387	522	10917	4.06204e+154	cno,CG13575,aux,Ilp2,Dredd,Sk1,daw,spz4,Ilp3,Hel89B,Ilp6,Hs3st-B,Ggamma30A,Pvr,CG10702,bnl,btl,Hrs,moody,pcx,Itp-r83A,gt,Oct-TyrR,GABA-B-R3,CG17760,wry,CCKLR-17D3,mthl2,Nup44A,CG31140,fus
GO:0007155	cell adhesion	0.153608	-1.87335	1	198	13	0.0249042	522	10917	3.40884e+66	CG7227,beat-IV,Arf79F,Mmp1,CG40006,CG9095,CG4629,egh,RhoL,ds,how,CG1887,santa-maria
GO:0042594	response to starvation	0.156478	-1.85484	1	93	7	0.01341	522	10917	4.28523e+34	Hsp68,Fer3HCH,spin,fab1,Itp-r83A,Atg8b,Adgf-A
GO:0051168	nuclear export	0.157478	-1.84847	1	44	4	0.00766284	522	10917	3.59264e+20	Phax,RpS28a,Nxf3,Clbn
GO:0051656	establishment of organelle localization	0.157858	-1.84606	1	181	12	0.0229885	522	10917	3.34584e+59	Hrs,cno,spin,Arf79F,aux,lva,Clc,Syx5,Arf51F,mael,BicD,rb
GO:0051240	positive regulation of multicellular organismal process	0.158169	-1.84409	1	60	5	0.00957854	522	10917	3.12204e+26	Ilp6,scny,Ilp2,mld,Ih
GO:0031669	cellular response to nutrient levels	0.158169	-1.84409	1	60	5	0.00957854	522	10917	3.22605e+24	Fer3HCH,spin,fab1,Atg8b,Adgf-A
GO:0046039	GTP metabolic process	0.158169	-1.84409	1	60	5	0.00957854	522	10917	4.08481e+27	alphaTub84B,Rgk1,kappaB-Ras,Gyc-89Da,CG17760
GO:0051663	oocyte nucleus localization involved in oocyte dorsal/ventral axis specification	0.159181	-1.83771	1	15	2	0.00383142	522	10917	4048935051	mael,BicD
GO:0006144	purine nucleobase metabolic process	0.159181	-1.83771	1	15	2	0.00383142	522	10917	3875339976	Prat2,Adgf-A
GO:0060259	regulation of feeding behavior	0.159181	-1.83771	1	15	2	0.00383142	522	10917	4066439150	Itp-r83A,Ilp2
GO:0050708	regulation of protein secretion	0.159181	-1.83771	1	15	2	0.00383142	522	10917	3214041177	p24-1,eca
GO:0009967	positive regulation of signal transduction	0.15981	-1.83377	1	236	15	0.0287356	522	10917	4.23564e+76	bnl,btl,Hrs,CG30456,Mkk4,CRMP,Oct-TyrR,eca,kn,daw,eIF-4B,Fer3HCH,Hmgcr,Pvr,CG11526
GO:0009991	response to extracellular stimulus	0.161455	-1.82353	1	111	8	0.0153257	522	10917	4.28525e+39	Hsp68,spin,Itp-r83A,Adgf-A,Fer3HCH,fab1,Ih,Atg8b
GO:0048102	autophagic cell death	0.161968	-1.82035	1	77	6	0.0114943	522	10917	3.97044e+29	Eig71Ed,Eig71Ef,Obp99b,Doa,santa-maria,Mmp1
GO:0035071	salivary gland cell autophagic cell death	0.161968	-1.82035	1	77	6	0.0114943	522	10917	3.97044e+29	Eig71Ed,Obp99b,Eig71Ef,Doa,santa-maria,Mmp1
GO:0006403	RNA localization	0.164435	-1.80524	1	129	9	0.0172414	522	10917	4.35643e+45	RpS28a,aub,orb,Phax,Nxf3,egh,mael,Rab6,BicD
GO:0030952	establishment or maintenance of cytoskeleton polarity	0.166767	-1.79116	1	45	4	0.00766284	522	10917	3.12394e+19	egh,mael,Rab6,BicD
GO:0007265	Ras protein signal transduction	0.168907	-1.77841	1	78	6	0.0114943	522	10917	4.16774e+29	f-cup,cno,Rab8,CRMP,Arf79F,Rab6
GO:0045924	regulation of female receptivity	0.171178	-1.76505	1	30	3	0.00574713	522	10917	3.12395e+17	egh,spin,Acp98AB
GO:0034968	histone lysine methylation	0.171178	-1.76505	1	30	3	0.00574713	522	10917	413034013339203	CG4565,ash1,E(z)
GO:0048583	regulation of response to stimulus	0.17265	-1.75649	1	835	46	0.0881226	522	10917	36769,40620,45380,35667,38648,31011,42869,41960,31953,117365,42788,31309,39564,33458,36929,40664,42452,45318,3772539,42803,32140,2768685,38412,36589,35927,37755,33288,34524,39150,35929,33474,41943,3355041,34127,42356,42770,41020,41427,40675,33139,40918,32253,41177,31239,4379907,32260	casp,cno,spin,kappaB-Ras,scny,Dredd,CG6182,CG5916,CG34408,HBS1,CG10157,dnc,btl,Hrs,CG30456,Itp-r83A,Oct-TyrR,kn,Spec2,Hmgcr,p24-1,mld,CG11526,Ih,Su(var)2-10,Sesn,Pino,aub,Ilp2,CG18659,daw,Hel89B,eIF-4B,Pvr,bnl,Irk2,Mkk4,Sbf,CRMP,S6kII,Sp7,rad,eca,egh,Mkp,Fer3HCH
GO:0065008	regulation of biological quality	0.173739	-1.7502	1	934	51	0.0977011	522	10917	40150,40620,45380,37249,40149,33661,32696,41136,32918,39564,33458,41377,43415,40664,33903,34966,35068,32858,32588,32416,39203,2768685,12798279,42295,32799,42473,34524,32797,39150,37912,37949,40221,39611,38407,33284,34127,34636,42356,36071,42770,31227,40506,39812,34427,36699,31239,32260,33245,38193,38301,31601	serp,cno,spin,CG11007,verm,HP6,Arpc3B,RhoL,Hs3st-B,btl,Hrs,sals,Doa,Itp-r83A,mmy,Syx5,Sytalpha,Cyp18a1,CG9911,CG9518,E(z),mld,Acp98AB,Ppcs,Frq2,CG3822,aub,Frq1,Ilp2,Letm1,Mmp1,Clc,bmm,ZnT63C,CG4629,Pvr,Rab6,bnl,KCNQ,Irk2,gt,Arf79F,Pdh,KdelR,Arf51F,egh,Fer3HCH,ds,ABCB7,CG8993,Ctr1A
GO:0031668	cellular response to extracellular stimulus	0.174004	-1.74867	1	62	5	0.00957854	522	10917	3.22605e+24	Fer3HCH,spin,fab1,Atg8b,Adgf-A
GO:0045471	response to ethanol	0.174004	-1.74867	1	62	5	0.00957854	522	10917	4.34284e+24	Pkc98E,Arf51F,moody,dnc,aay
GO:0048079	regulation of cuticle pigmentation	0.176458	-1.73467	1	16	2	0.00383142	522	10917	4102042521	Mkk4,e
GO:0070142	synaptic vesicle budding	0.176458	-1.73467	1	16	2	0.00383142	522	10917	3138140221	rb,Clc
GO:0030536	larval feeding behavior	0.176458	-1.73467	1	16	2	0.00383142	522	10917	4066439150	Itp-r83A,Ilp2
GO:0006639	acylglycerol metabolic process	0.176458	-1.73467	1	16	2	0.00383142	522	10917	3335439611	CG17646,bmm
GO:0016185	synaptic vesicle budding from presynaptic membrane	0.176458	-1.73467	1	16	2	0.00383142	522	10917	3138140221	rb,Clc
GO:0007428	primary branching, open tracheal system	0.176458	-1.73467	1	16	2	0.00383142	522	10917	4235639564	bnl,btl
GO:0006638	neutral lipid metabolic process	0.176458	-1.73467	1	16	2	0.00383142	522	10917	3335439611	CG17646,bmm
GO:0045434	negative regulation of female receptivity, post-mating	0.176458	-1.73467	1	16	2	0.00383142	522	10917	3123912798279	egh,Acp98AB
GO:0072350	tricarboxylic acid metabolic process	0.177998	-1.72598	1	4	1	0.00191571	522	10917	36760	ATPCL
GO:0051282	regulation of sequestering of calcium ion	0.177998	-1.72598	1	4	1	0.00191571	522	10917	40664	Itp-r83A
GO:0071230	cellular response to amino acid stimulus	0.177998	-1.72598	1	4	1	0.00191571	522	10917	37122	CG5189
GO:0010037	response to carbon dioxide	0.177998	-1.72598	1	4	1	0.00191571	522	10917	45234	Ggamma30A
GO:0001744	optic lobe placode formation	0.177998	-1.72598	1	4	1	0.00191571	522	10917	31239	egh
GO:0006563	L-serine metabolic process	0.177998	-1.72598	1	4	1	0.00191571	522	10917	39085	aay
GO:0046173	polyol biosynthetic process	0.177998	-1.72598	1	4	1	0.00191571	522	10917	32285	IP3K2
GO:0006583	melanin biosynthetic process from tyrosine	0.177998	-1.72598	1	4	1	0.00191571	522	10917	42521	e
GO:0015833	peptide transport	0.177998	-1.72598	1	4	1	0.00191571	522	10917	41175	CG9444
GO:0071696	ectodermal placode development	0.177998	-1.72598	1	4	1	0.00191571	522	10917	31239	egh
GO:0071697	ectodermal placode morphogenesis	0.177998	-1.72598	1	4	1	0.00191571	522	10917	31239	egh
GO:0070863	positive regulation of protein exit from endoplasmic reticulum	0.177998	-1.72598	1	4	1	0.00191571	522	10917	41177	eca
GO:0009414	response to water deprivation	0.177998	-1.72598	1	4	1	0.00191571	522	10917	44121	TotA
GO:0035721	intraciliary retrograde transport	0.177998	-1.72598	1	4	1	0.00191571	522	10917	33230	rempA
GO:0048010	vascular endothelial growth factor receptor signaling pathway	0.177998	-1.72598	1	4	1	0.00191571	522	10917	34127	Pvr
GO:0060078	regulation of postsynaptic membrane potential	0.177998	-1.72598	1	4	1	0.00191571	522	10917	34636	Rab6
GO:0045745	positive regulation of G-protein coupled receptor protein signaling pathway	0.177998	-1.72598	1	4	1	0.00191571	522	10917	42452	Oct-TyrR
GO:0051237	maintenance of RNA location	0.177998	-1.72598	1	4	1	0.00191571	522	10917	34524	aub
GO:0061058	regulation of peptidoglycan recognition protein signaling pathway	0.177998	-1.72598	1	4	1	0.00191571	522	10917	36769	casp
GO:0007299	ovarian follicle cell-cell adhesion	0.177998	-1.72598	1	4	1	0.00191571	522	10917	31239	egh
GO:0045921	positive regulation of exocytosis	0.177998	-1.72598	1	4	1	0.00191571	522	10917	35051	BicD
GO:0002181	cytoplasmic translation	0.177998	-1.72598	1	4	1	0.00191571	522	10917	43564	RpS28a
GO:0006941	striated muscle contraction	0.177998	-1.72598	1	4	1	0.00191571	522	10917	36071	KCNQ
GO:0043507	positive regulation of JUN kinase activity	0.177998	-1.72598	1	4	1	0.00191571	522	10917	41020	Mkk4
GO:0006012	galactose metabolic process	0.177998	-1.72598	1	4	1	0.00191571	522	10917	38076	Gale
GO:0051029	rRNA transport	0.177998	-1.72598	1	4	1	0.00191571	522	10917	43564	RpS28a
GO:0015868	purine ribonucleotide transport	0.177998	-1.72598	1	4	1	0.00191571	522	10917	32008	Ant2
GO:1902882	regulation of response to oxidative stress	0.177998	-1.72598	1	4	1	0.00191571	522	10917	37755	Sesn
GO:0001743	optic placode formation	0.177998	-1.72598	1	4	1	0.00191571	522	10917	31239	egh
GO:0015865	purine nucleotide transport	0.177998	-1.72598	1	4	1	0.00191571	522	10917	32008	Ant2
GO:0032053	ciliary basal body organization	0.177998	-1.72598	1	4	1	0.00191571	522	10917	34894	yuri
GO:0046113	nucleobase catabolic process	0.177998	-1.72598	1	4	1	0.00191571	522	10917	40675	CRMP
GO:0002833	positive regulation of response to biotic stimulus	0.177998	-1.72598	1	4	1	0.00191571	522	10917	42788	CG10157
GO:0045740	positive regulation of DNA replication	0.177998	-1.72598	1	4	1	0.00191571	522	10917	31789	otu
GO:0071577	zinc ion transmembrane transport	0.177998	-1.72598	1	4	1	0.00191571	522	10917	38407	ZnT63C
GO:0006094	gluconeogenesis	0.177998	-1.72598	1	4	1	0.00191571	522	10917	36020	CG1516
GO:0060788	ectodermal placode formation	0.177998	-1.72598	1	4	1	0.00191571	522	10917	31239	egh
GO:0060305	regulation of cell diameter	0.177998	-1.72598	1	4	1	0.00191571	522	10917	34966	Syx5
GO:0006085	acetyl-CoA biosynthetic process	0.177998	-1.72598	1	4	1	0.00191571	522	10917	36760	ATPCL
GO:0010884	positive regulation of lipid storage	0.177998	-1.72598	1	4	1	0.00191571	522	10917	39611	bmm
GO:0051640	organelle localization	0.178784	-1.72158	1	204	13	0.0249042	522	10917	3.34584e+64	Hrs,cno,spin,CRMP,Arf79F,aux,lva,Clc,Syx5,Arf51F,mael,BicD,rb
GO:0051056	regulation of small GTPase mediated signal transduction	0.18094	-1.70959	1	168	11	0.0210728	522	10917	3.69294e+56	CG30456,Sbf,S6kII,rad,CG18659,CG6182,CG5916,Spec2,Hmgcr,CG34408,CG11526
GO:0030030	cell projection organization	0.181148	-1.70844	1	643	36	0.0689655	522	10917	4.70804e+181	acj6,aay,ras,amos,CG4842,dnc,btl,mmy,kn,Oli,exex,Myo10A,Nckx30C,E(z),f,Aats-gly,rempA,CG42732,daw,beat-Ia,Pvr,Rab6,Xe7,wor,bnl,Pkc98E,Irk2,Mkk4,Glt,Mical,gt,lva,egh,ds,wrapper,CG3259
GO:0009165	nucleotide biosynthetic process	0.181652	-1.70566	1	97	7	0.01341	522	10917	3.59184e+34	CG8080,ras,CG2246,Prat2,Gyc-89Da,CG8417,Ppcs
GO:1901293	nucleoside phosphate biosynthetic process	0.181652	-1.70566	1	97	7	0.01341	522	10917	3.59184e+34	CG8080,ras,CG2246,Prat2,Gyc-89Da,CG8417,Ppcs
GO:0006066	alcohol metabolic process	0.182142	-1.70297	1	63	5	0.00957854	522	10917	3.22851e+27	IP3K2,Cct1,CG9518,mld,Pdh
GO:0008049	male courtship behavior	0.182142	-1.70297	1	63	5	0.00957854	522	10917	3.22453e+24	fne,egh,Gr68a,aay,Gr32a
GO:0015931	nucleobase-containing compound transport	0.183146	-1.69747	1	80	6	0.0114943	522	10917	3.59264e+30	Phax,RpS28a,Nxf3,egh,BicD,Ant2
GO:0060322	head development	0.183245	-1.69693	1	31	3	0.00574713	522	10917	408353122745318	Antp,gt,kn
GO:0006405	RNA export from nucleus	0.183245	-1.69693	1	31	3	0.00574713	522	10917	3592643564317870	Phax,RpS28a,Nxf3
GO:0010927	cellular component assembly involved in morphogenesis	0.184702	-1.68901	1	187	12	0.0229885	522	10917	4.23564e+59	bnl,Mical,rols,rempA,aub,CG15571,Cp38,Cp15,mael,how,Ppcs,CG3259
GO:0060811	intracellular mRNA localization involved in anterior/posterior axis specification	0.185903	-1.68253	1	47	4	0.00766284	522	10917	4.04893e+19	mael,aub,Rab6,orb
GO:0009108	coenzyme biosynthetic process	0.185903	-1.68253	1	47	4	0.00766284	522	10917	3.59184e+19	CG8080,ATPCL,pug,Ppcs
GO:0044708	single-organism behavior	0.190253	-1.6594	1	395	23	0.0440613	522	10917	4.34973e+116	Obp99b,Pino,e,Ilp2,acj6,verm,aay,jet,Ilp3,shakB,svr,dnc,Pkc98E,CRMP,moody,Itp-r83A,S6kII,rad,Arf51F,mld,CCKLR-17D3,Ih,CG9664
GO:0043414	macromolecule methylation	0.190417	-1.65854	1	64	5	0.00957854	522	10917	3.40644e+25	LKR,CG4565,CG32152,ash1,E(z)
GO:0009653	anatomical structure morphogenesis	0.190812	-1.65647	1	1663	87	0.166667	522	10917	43582,40620,45380,42749,39085,39704,35110,36929,43415,39703,31365,34966,45318,35066,32028,32858,34024,33230,39368,3772382,37912,37949,42752,5740325,39700,34894,34947,42596,34636,39710,34906,43428,34193,41225,31227,33470,36699,38999,31239,40489,40896,40527,39709,31011,47080,40149,43873,36378,39817,32130,32918,31309,37619,39564,33903,35546,38884,45248,32718,39203,33862,42295,117353,43497,39707,3098…	Tpi,cno,spin,EloA,aay,Eig71Ed,amos,CG30456,Doa,Eig71Ec,CG15571,Syx5,kn,Oli,Myo10A,Cyp18a1,santa-maria,rempA,rols,cp309,Letm1,Mmp1,orb,CG42732,Eig71Ea,yuri,beat-Ia,how,Rab6,Eig71Ei,wor,Pkc98E,Glt,Mical,gt,colt,Arf51F,Cp15,egh,mael,alpha-Est10,aux,Eig71Eh,Dredd,acj6,verm,ras,Cyp301a1,CG4842,dy,Hs3st-B,dnc,stl,btl,mmy,Ptr,exex,Nckx30C,f,E(z),CG9175,Ppcs,Cct1,Obp99b,Eig71Ef,l(1)sc,Aats-gly,aub,Hrb98D…
GO:0023056	positive regulation of signaling	0.19147	-1.65302	1	244	15	0.0287356	522	10917	4.23564e+76	bnl,btl,Hrs,CG30456,Mkk4,CRMP,Oct-TyrR,eca,kn,daw,eIF-4B,Fer3HCH,Hmgcr,Pvr,CG11526
GO:0003015	heart process	0.194007	-1.63986	1	17	2	0.00383142	522	10917	3607133361	KCNQ,wry
GO:0006730	one-carbon metabolic process	0.194007	-1.63986	1	17	2	0.00383142	522	10917	3478641279	CAH1,pug
GO:0046496	nicotinamide nucleotide metabolic process	0.194007	-1.63986	1	17	2	0.00383142	522	10917	3591841225	CG8080,Mical
GO:0030838	positive regulation of actin filament polymerization	0.194007	-1.63986	1	17	2	0.00383142	522	10917	3269641377	Arpc3B,sals
GO:0006898	receptor-mediated endocytosis	0.194007	-1.63986	1	17	2	0.00383142	522	10917	26132940221	CG8176,Clc
GO:0003013	circulatory system process	0.194007	-1.63986	1	17	2	0.00383142	522	10917	3607133361	KCNQ,wry
GO:0048520	positive regulation of behavior	0.194007	-1.63986	1	17	2	0.00383142	522	10917	276868536589	mld,Ih
GO:0019362	pyridine nucleotide metabolic process	0.194007	-1.63986	1	17	2	0.00383142	522	10917	3591841225	CG8080,Mical
GO:0035210	prepupal development	0.194007	-1.63986	1	17	2	0.00383142	522	10917	3285834352	Cyp18a1,RpL7
GO:0006487	protein N-linked glycosylation	0.194007	-1.63986	1	17	2	0.00383142	522	10917	3413431957	wol,alpha-Man-I
GO:0009069	serine family amino acid metabolic process	0.194007	-1.63986	1	17	2	0.00383142	522	10917	3713939085	CG5493,aay
GO:0006614	SRP-dependent cotranslational protein targeting to membrane	0.194007	-1.63986	1	17	2	0.00383142	522	10917	3902843034	Srp68,CG10420
GO:0030713	ovarian follicle cell stalk formation	0.194007	-1.63986	1	17	2	0.00383142	522	10917	4229537619	Ppcs,stl
GO:0044700	single organism signaling	0.194118	-1.63929	1	1363	72	0.137931	522	10917	31764,40620,45380,39151,41136,31220,33062,35181,33438,41037,43415,40664,34594,42452,45318,34966,34024,32864,42836,32799,39150,37912,40221,41943,45234,34636,31381,34906,43428,40675,39518,31168,31227,36385,33248,36699,40168,42203,38636,35762,44095,35667,40761,34503,37883,40527,31011,32089,34572,53471,32918,31309,33458,39564,31204,38884,35068,37033,32416,42473,32797,33474,34127,35051,42001,40699,423…	Corp,cno,spin,Ilp3,RhoL,Ilp6,shakB,CG10702,Cyp309a1,CG8136,Doa,Itp-r83A,Pde1c,Oct-TyrR,kn,Syx5,santa-maria,CCKLR-17D3,CG31140,Frq2,Ilp2,Letm1,Clc,Hel89B,Ggamma30A,Rab6,rb,wor,Pkc98E,CRMP,stv,moody,gt,CG17760,GABA-B-R3,Arf51F,Rab8,PKD,mthl2,Nup44A,fus,kappaB-Ras,Osi7,Dnz1,CG13575,aux,Dredd,Sk1,spz4,SP555,Hs3st-B,dnc,Hrs,btl,pcx,exex,Sytalpha,fab1,CG9518,CG3822,Frq1,daw,Pvr,BicD,Gyc-89Da,Xe7,bnl,Mk…
GO:0023052	signaling	0.194118	-1.63929	1	1363	72	0.137931	522	10917	31764,40620,45380,39151,41136,31220,33062,35181,33438,41037,43415,40664,34594,42452,34966,45318,34024,32864,42836,32799,37912,39150,40221,41943,45234,34636,31381,34906,43428,40675,31168,39518,31227,36385,33248,36699,40168,42203,35762,44095,38636,35667,34503,37883,40761,40527,31011,34572,32089,53471,32918,31309,33458,39564,31204,38884,35068,37033,32416,42473,32797,33474,34127,35051,42001,40699,423…	Corp,cno,spin,Ilp3,RhoL,Ilp6,shakB,CG10702,Cyp309a1,CG8136,Doa,Itp-r83A,Pde1c,Oct-TyrR,Syx5,kn,santa-maria,CCKLR-17D3,CG31140,Frq2,Letm1,Ilp2,Clc,Hel89B,Ggamma30A,Rab6,rb,wor,Pkc98E,CRMP,moody,stv,gt,CG17760,GABA-B-R3,Arf51F,Rab8,PKD,Nup44A,fus,mthl2,kappaB-Ras,Dnz1,CG13575,Osi7,aux,Dredd,spz4,Sk1,SP555,Hs3st-B,dnc,Hrs,btl,pcx,exex,Sytalpha,fab1,CG9518,CG3822,Frq1,daw,Pvr,BicD,Gyc-89Da,Xe7,bnl,Mk…
GO:0070727	cellular macromolecule localization	0.194225	-1.63874	1	358	21	0.0402299	522	10917	3.73374e+104	CG11110,cbs,aub,Clc,orb,Slh,BicD,Rab6,rb,Clbn,Hrs,Vps26,Syx5,KdelR,KrT95D,Myo10A,Srp68,mael,CG10420,Nup44A,CG10144
GO:0007306	eggshell chorion assembly	0.197842	-1.62029	1	82	6	0.0114943	522	10917	3.17884e+29	Cp38,Cp15,aub,mael,CG15571,Ppcs
GO:0050896	response to stimulus	0.200304	-1.60792	1	2441	125	0.239464	522	10917	34088,31764,43582,40620,45380,39085,39151,39704,41136,31220,33062,35181,35275,43415,39703,40664,34594,42452,33764,35066,45318,34024,32864,36589,33540,12798279,42836,32245,39701,42521,31957,37912,39150,37949,39700,34894,41384,41943,34947,40133,246552,45234,3885628,40450,34636,39710,43428,34193,40675,31168,39273,41225,31227,32253,39869,37122,36385,33248,39976,246442,36699,31239,32260,40168,42203,35…	CG7227,Corp,Tpi,cno,spin,aay,Ilp3,Eig71Ed,RhoL,Ilp6,shakB,CG10702,Victoria,Doa,Eig71Ec,Itp-r83A,Pde1c,Oct-TyrR,TotM,Oli,kn,santa-maria,CCKLR-17D3,Ih,CG9664,Acp98AB,CG31140,fne,Eig71Eb,e,alpha-Man-I,Letm1,Ilp2,Mmp1,Eig71Ea,yuri,CG10898,Hel89B,beat-Ia,ash1,CG30344,Ggamma30A,Ir62a,CG7130,Rab6,Eig71Ei,Pkc98E,Glt,CRMP,moody,CG6168,Mical,gt,rad,PGRP-SB2,CG5189,CG17760,GABA-B-R3,Adgf-A,Ir51b,Arf51F,egh,…
GO:0032504	multicellular organism reproduction	0.200326	-1.60781	1	1106	59	0.113027	522	10917	33260,45380,8674007,40527,31011,39085,36619,3885660,39151,43873,41136,39324,37619,31309,39564,33458,8674054,43415,39205,33672,31365,34594,35838,31789,34966,32858,42803,12798279,42295,32245,117353,39368,34524,39150,53541,42752,43385,3885578,37220,34894,31788,40133,34127,42596,34636,35051,34545,31033,39273,32165,34581,36699,8673981,31239,38999,40489,32353,35762,246645	CG3662,spin,Sfp33A4,aux,Dredd,aay,tra2,CG34051,Ilp3,ras,RhoL,Gr68a,stl,dnc,btl,Hrs,Sfp23F,Doa,CG18628,Taf12L,CG15571,Pde1c,CG42326,otu,Syx5,Cyp18a1,Hmgcr,Acp98AB,Ppcs,fne,Cct1,rols,aub,Ilp2,lectin-30A,orb,Hrb98DE,CG42823,CG9975,yuri,Cp38,ash1,Pvr,how,Rab6,BicD,Gr32a,CG11664,CG6168,regucalcin,spag4,Arf51F,Sfp26Ad,egh,Cp15,mael,mamo,Nup44A,CG30486
GO:0050776	regulation of immune response	0.20308	-1.59415	1	118	8	0.0153257	522	10917	3.67694e+40	casp,Hel89B,scny,Sp7,aub,HBS1,Dredd,Su(var)2-10
GO:0035070	salivary gland histolysis	0.205349	-1.58304	1	83	6	0.0114943	522	10917	3.97044e+29	Eig71Ed,Obp99b,Eig71Ef,Doa,santa-maria,Mmp1
GO:0042303	molting cycle	0.207354	-1.57333	1	66	5	0.00957854	522	10917	4.28034e+24	Hmgcr,e,Itp-r83A,scny,Mmp1
GO:0008298	intracellular mRNA localization	0.207354	-1.57333	1	66	5	0.00957854	522	10917	4.04893e+24	mael,aub,BicD,Rab6,orb
GO:0007591	molting cycle, chitin-based cuticle	0.207354	-1.57333	1	66	5	0.00957854	522	10917	4.28034e+24	Hmgcr,e,Itp-r83A,scny,Mmp1
GO:0006888	ER to Golgi vesicle-mediated transport	0.208008	-1.57018	1	33	3	0.00574713	522	10917	400944117736197	Bet1,eca,CG9067
GO:0006816	calcium ion transport	0.208008	-1.57018	1	33	3	0.00574713	522	10917	452484066437912	Nckx30C,Itp-r83A,Letm1
GO:1901605	alpha-amino acid metabolic process	0.208392	-1.56834	1	101	7	0.01341	522	10917	4.25214e+34	e,pug,PH4alphaEFB,Gs1,CG5493,P5CDh2,aay
GO:0060341	regulation of cellular localization	0.208997	-1.56543	1	137	9	0.0172414	522	10917	3.27993e+44	Frq2,S6kII,aub,Frq1,eca,p24-1,mael,BicD,Ih
GO:0022610	biological adhesion	0.210508	-1.55823	1	211	13	0.0249042	522	10917	3.40884e+66	CG7227,beat-IV,Arf79F,Mmp1,CG40006,CG9095,CG4629,egh,RhoL,ds,how,CG1887,santa-maria
GO:0043052	thermotaxis	0.211764	-1.55228	1	18	2	0.00383142	522	10917	3402436076	santa-maria,Hdc
GO:0008362	chitin-based embryonic cuticle biosynthetic process	0.211764	-1.55228	1	18	2	0.00383142	522	10917	4341533903	Doa,mmy
GO:0007621	negative regulation of female receptivity	0.211764	-1.55228	1	18	2	0.00383142	522	10917	3123912798279	egh,Acp98AB
GO:0045807	positive regulation of endocytosis	0.211764	-1.55228	1	18	2	0.00383142	522	10917	4050635051	Arf79F,BicD
GO:0046854	phosphatidylinositol phosphorylation	0.211764	-1.55228	1	18	2	0.00383142	522	10917	3703343516	fab1,CG7789
GO:0072599	establishment of protein localization to endoplasmic reticulum	0.211764	-1.55228	1	18	2	0.00383142	522	10917	3902843034	Srp68,CG10420
GO:0070328	triglyceride homeostasis	0.211764	-1.55228	1	18	2	0.00383142	522	10917	3915042295	Ilp2,Ppcs
GO:0045047	protein targeting to ER	0.211764	-1.55228	1	18	2	0.00383142	522	10917	3902843034	Srp68,CG10420
GO:0035289	posterior head segmentation	0.211764	-1.55228	1	18	2	0.00383142	522	10917	3122745318	gt,kn
GO:0006613	cotranslational protein targeting to membrane	0.211764	-1.55228	1	18	2	0.00383142	522	10917	3902843034	Srp68,CG10420
GO:0007526	larval somatic muscle development	0.211764	-1.55228	1	18	2	0.00383142	522	10917	4122545318	Mical,kn
GO:0046486	glycerolipid metabolic process	0.212958	-1.54666	1	84	6	0.0114943	522	10917	1.17353e+30	Cct1,fab1,CG17646,CG7789,CG2292,bmm
GO:0006520	cellular amino acid metabolic process	0.215232	-1.53604	1	212	13	0.0249042	522	10917	3.96444e+64	Aats-gly,e,Aats-val,Gs1,P5CDh2,Hdc,aay,Aats-tyr,CG11796,se,PH4alphaEFB,pug,CG5493
GO:0060810	intracellular mRNA localization involved in pattern specification process	0.215829	-1.53327	1	50	4	0.00766284	522	10917	4.04893e+19	mael,aub,Rab6,orb
GO:0008652	cellular amino acid biosynthetic process	0.215829	-1.53327	1	50	4	0.00766284	522	10917	4.12793e+19	pug,Gs1,P5CDh2,aay
GO:0010033	response to organic substance	0.217138	-1.52722	1	307	18	0.0344828	522	10917	4.34974e+90	Obp99b,Ilp2,aay,daw,Ilp3,Ilp6,Pvr,Ggamma30A,CG30344,dnc,Hsp68,Pkc98E,bnl,btl,moody,CG5189,Arf51F,TotA
GO:0000422	mitochondrion degradation	0.217317	-1.5264	1	5	1	0.00191571	522	10917	37755	Sesn
GO:0035270	endocrine system development	0.217317	-1.5264	1	5	1	0.00191571	522	10917	31227	gt
GO:0060260	regulation of transcription initiation from RNA polymerase II promoter	0.217317	-1.5264	1	5	1	0.00191571	522	10917	40790	TfIIFalpha
GO:0032317	regulation of Rap GTPase activity	0.217317	-1.5264	1	5	1	0.00191571	522	10917	32253	rad
GO:0060250	germ-line stem-cell niche homeostasis	0.217317	-1.5264	1	5	1	0.00191571	522	10917	39150	Ilp2
GO:0035271	ring gland development	0.217317	-1.5264	1	5	1	0.00191571	522	10917	31227	gt
GO:0043200	response to amino acid	0.217317	-1.5264	1	5	1	0.00191571	522	10917	37122	CG5189
GO:0070861	regulation of protein exit from endoplasmic reticulum	0.217317	-1.5264	1	5	1	0.00191571	522	10917	41177	eca
GO:0042886	amide transport	0.217317	-1.5264	1	5	1	0.00191571	522	10917	41175	CG9444
GO:0072595	maintenance of protein localization in organelle	0.217317	-1.5264	1	5	1	0.00191571	522	10917	34427	KdelR
GO:0042447	hormone catabolic process	0.217317	-1.5264	1	5	1	0.00191571	522	10917	32858	Cyp18a1
GO:2000252	negative regulation of feeding behavior	0.217317	-1.5264	1	5	1	0.00191571	522	10917	39150	Ilp2
GO:0030042	actin filament depolymerization	0.217317	-1.5264	1	5	1	0.00191571	522	10917	41225	Mical
GO:0006031	chitin biosynthetic process	0.217317	-1.5264	1	5	1	0.00191571	522	10917	33903	mmy
GO:0007284	spermatogonial cell division	0.217317	-1.5264	1	5	1	0.00191571	522	10917	42596	how
GO:0051482	positive regulation of cytosolic calcium ion concentration involved in phospholipase C-activating G-protein coupled signaling pathway	0.217317	-1.5264	1	5	1	0.00191571	522	10917	40664	Itp-r83A
GO:0015937	coenzyme A biosynthetic process	0.217317	-1.5264	1	5	1	0.00191571	522	10917	42295	Ppcs
GO:0033866	nucleoside bisphosphate biosynthetic process	0.217317	-1.5264	1	5	1	0.00191571	522	10917	42295	Ppcs
GO:0043589	skin morphogenesis	0.217317	-1.5264	1	5	1	0.00191571	522	10917	40620	cno
GO:2000242	negative regulation of reproductive process	0.217317	-1.5264	1	5	1	0.00191571	522	10917	43415	Doa
GO:0035203	regulation of lamellocyte differentiation	0.217317	-1.5264	1	5	1	0.00191571	522	10917	45318	kn
GO:0048730	epidermis morphogenesis	0.217317	-1.5264	1	5	1	0.00191571	522	10917	40620	cno
GO:0032854	positive regulation of Rap GTPase activity	0.217317	-1.5264	1	5	1	0.00191571	522	10917	32253	rad
GO:0015695	organic cation transport	0.217317	-1.5264	1	5	1	0.00191571	522	10917	42891	Orct
GO:0051054	positive regulation of DNA metabolic process	0.217317	-1.5264	1	5	1	0.00191571	522	10917	31789	otu
GO:0035074	pupation	0.217317	-1.5264	1	5	1	0.00191571	522	10917	32858	Cyp18a1
GO:0032875	regulation of DNA endoreduplication	0.217317	-1.5264	1	5	1	0.00191571	522	10917	31789	otu
GO:0000188	inactivation of MAPK activity	0.217317	-1.5264	1	5	1	0.00191571	522	10917	4379907	Mkp
GO:0043902	positive regulation of multi-organism process	0.217317	-1.5264	1	5	1	0.00191571	522	10917	42788	CG10157
GO:0034033	purine nucleoside bisphosphate biosynthetic process	0.217317	-1.5264	1	5	1	0.00191571	522	10917	42295	Ppcs
GO:0034030	ribonucleoside bisphosphate biosynthetic process	0.217317	-1.5264	1	5	1	0.00191571	522	10917	42295	Ppcs
GO:0007521	muscle cell fate determination	0.217317	-1.5264	1	5	1	0.00191571	522	10917	42596	how
GO:0035041	sperm chromatin decondensation	0.217317	-1.5264	1	5	1	0.00191571	522	10917	32353	mamo
GO:0019099	female germ-line sex determination	0.217317	-1.5264	1	5	1	0.00191571	522	10917	31789	otu
GO:2000142	regulation of DNA-templated transcription, initiation	0.217317	-1.5264	1	5	1	0.00191571	522	10917	40790	TfIIFalpha
GO:0042682	regulation of compound eye cone cell fate specification	0.217317	-1.5264	1	5	1	0.00191571	522	10917	33139	S6kII
GO:0045743	positive regulation of fibroblast growth factor receptor signaling pathway	0.217317	-1.5264	1	5	1	0.00191571	522	10917	33458	Hrs
GO:0010824	regulation of centrosome duplication	0.217317	-1.5264	1	5	1	0.00191571	522	10917	41067	skap
GO:0030423	targeting of mRNA for destruction involved in RNA interference	0.217317	-1.5264	1	5	1	0.00191571	522	10917	34524	aub
GO:0009396	folic acid-containing compound biosynthetic process	0.217317	-1.5264	1	5	1	0.00191571	522	10917	41279	pug
GO:0007249	I-kappaB kinase/NF-kappaB signaling	0.217317	-1.5264	1	5	1	0.00191571	522	10917	43428	Pkc98E
GO:0045613	regulation of plasmatocyte differentiation	0.217317	-1.5264	1	5	1	0.00191571	522	10917	45318	kn
GO:0045980	negative regulation of nucleotide metabolic process	0.217317	-1.5264	1	5	1	0.00191571	522	10917	50133	CG13551
GO:1901073	glucosamine-containing compound biosynthetic process	0.217317	-1.5264	1	5	1	0.00191571	522	10917	33903	mmy
GO:0050771	negative regulation of axonogenesis	0.217317	-1.5264	1	5	1	0.00191571	522	10917	39564	btl
GO:0016575	histone deacetylation	0.217317	-1.5264	1	5	1	0.00191571	522	10917	326120	HdacX
GO:0046364	monosaccharide biosynthetic process	0.217317	-1.5264	1	5	1	0.00191571	522	10917	36020	CG1516
GO:0006856	eye pigment precursor transport	0.217317	-1.5264	1	5	1	0.00191571	522	10917	37724	bw
GO:0007211	octopamine or tyramine signaling pathway	0.217317	-1.5264	1	5	1	0.00191571	522	10917	42452	Oct-TyrR
GO:0019319	hexose biosynthetic process	0.217317	-1.5264	1	5	1	0.00191571	522	10917	36020	CG1516
GO:0090407	organophosphate biosynthetic process	0.218836	-1.51943	1	157	10	0.0191571	522	10917	3.22851e+50	IP3K2,Cct1,CG2292,CG8080,ras,CG2246,Prat2,CG8417,Gyc-89Da,Ppcs
GO:0007631	feeding behavior	0.220657	-1.51114	1	34	3	0.00574713	522	10917	406643915031309	Itp-r83A,Ilp2,dnc
GO:0009306	protein secretion	0.220657	-1.51114	1	34	3	0.00574713	522	10917	434153386234966	Doa,CG9175,Syx5
GO:0009187	cyclic nucleotide metabolic process	0.220657	-1.51114	1	34	3	0.00574713	522	10917	345944200131309	Pde1c,Gyc-89Da,dnc
GO:0010647	positive regulation of cell communication	0.221441	-1.5076	1	251	15	0.0287356	522	10917	4.23564e+76	bnl,btl,Hrs,CG30456,Mkk4,CRMP,Oct-TyrR,eca,kn,daw,eIF-4B,Fer3HCH,Hmgcr,Pvr,CG11526
GO:0032879	regulation of localization	0.221596	-1.5069	1	270	16	0.0306513	522	10917	4.23563e+79	bnl,Hrs,Frq2,cno,Itp-r83A,Arf79F,S6kII,aub,Frq1,eca,bmm,p24-1,mael,BicD,rb,Ih
GO:0050658	RNA transport	0.224763	-1.49271	1	68	5	0.00957854	522	10917	3.59264e+25	Phax,RpS28a,Nxf3,egh,BicD
GO:0050657	nucleic acid transport	0.224763	-1.49271	1	68	5	0.00957854	522	10917	3.59264e+25	Phax,RpS28a,Nxf3,egh,BicD
GO:0009166	nucleotide catabolic process	0.224763	-1.49271	1	68	5	0.00957854	522	10917	4.08481e+27	alphaTub84B,Rgk1,kappaB-Ras,Gyc-89Da,CG17760
GO:0007315	pole plasm assembly	0.226085	-1.48684	1	51	4	0.00766284	522	10917	4.04893e+19	mael,aub,Rab6,orb
GO:0002682	regulation of immune system process	0.226962	-1.48297	1	177	11	0.0210728	522	10917	3.67694e+55	casp,scny,Sp7,Arf79F,aub,Dredd,kn,Hel89B,Pvr,HBS1,Su(var)2-10
GO:0030031	cell projection assembly	0.228459	-1.4764	1	86	6	0.0114943	522	10917	4.23564e+29	bnl,btl,Myo10A,rempA,Pvr,CG3259
GO:0006030	chitin metabolic process	0.228614	-1.47572	1	122	8	0.0153257	522	10917	4.20804e+42	Mur89F,serp,CG42494,obst-H,mmy,CG32284,CG12009,verm
GO:0032273	positive regulation of protein polymerization	0.229668	-1.47112	1	19	2	0.00383142	522	10917	3269641377	Arpc3B,sals
GO:0007430	terminal branching, open tracheal system	0.229668	-1.47112	1	19	2	0.00383142	522	10917	4235639564	bnl,btl
GO:0035099	hemocyte migration	0.229668	-1.47112	1	19	2	0.00383142	522	10917	4113634127	RhoL,Pvr
GO:0046834	lipid phosphorylation	0.229668	-1.47112	1	19	2	0.00383142	522	10917	3703343516	fab1,CG7789
GO:0055090	acylglycerol homeostasis	0.229668	-1.47112	1	19	2	0.00383142	522	10917	3915042295	Ilp2,Ppcs
GO:0051239	regulation of multicellular organismal process	0.232915	-1.45708	1	564	31	0.059387	522	10917	4.06205e+156	cno,spin,e,scny,aub,Ilp2,Ilp6,Hs3st-B,how,Pvr,sinah,bnl,KCNQ,btl,Hrs,Mkk4,Doa,S6kII,gt,Arf79F,lva,rad,eca,kn,egh,ds,p24-1,mael,Ctr1A,mld,Ih
GO:0001934	positive regulation of protein phosphorylation	0.233457	-1.45476	1	35	3	0.00574713	522	10917	423563956441020	bnl,btl,Mkk4
GO:0051236	establishment of RNA localization	0.233626	-1.45403	1	69	5	0.00957854	522	10917	3.59264e+25	Phax,RpS28a,Nxf3,egh,BicD
GO:0007474	imaginal disc-derived wing vein specification	0.236463	-1.44196	1	52	4	0.00766284	522	10917	3.31393e+19	S6kII,Hs3st-B,EloA,kn
GO:0048149	behavioral response to ethanol	0.236463	-1.44196	1	52	4	0.00766284	522	10917	3.66993e+19	Arf51F,moody,dnc,aay
GO:0032535	regulation of cellular component size	0.236498	-1.44181	1	105	7	0.01341	522	10917	3.26964e+34	Arpc3B,btl,sals,Hs3st-B,gt,Ilp2,Syx5
GO:0006605	protein targeting	0.241794	-1.41967	1	124	8	0.0153257	522	10917	4.28434e+39	KrT95D,CG11110,Srp68,cbs,CG10420,Vps26,Nup44A,Slh
GO:0055086	nucleobase-containing small molecule metabolic process	0.242464	-1.4169	1	294	17	0.032567	522	10917	4.08484e+87	alphaTub84B,kappaB-Ras,ras,CG2246,Gyc-89Da,CG8417,dnc,Rgk1,Mical,CRMP,Pde1c,CG17760,Adgf-A,CG8080,Hmgcr,Prat2,Ppcs
GO:1901292	nucleoside phosphate catabolic process	0.242586	-1.4164	1	70	5	0.00957854	522	10917	4.08481e+27	alphaTub84B,Rgk1,kappaB-Ras,Gyc-89Da,CG17760
GO:0006839	mitochondrial transport	0.244308	-1.40933	1	88	6	0.0114943	522	10917	3.65674e+29	CG18327,CG11110,Letm1,Ant2,colt,CG32103
GO:0030239	myofibril assembly	0.246385	-1.40086	1	36	3	0.00574713	522	10917	412253936842596	Mical,rols,how
GO:0032870	cellular response to hormone stimulus	0.246951	-1.39856	1	53	4	0.00766284	522	10917	3.91513e+19	Ilp3,Ilp6,Pvr,Ilp2
GO:0001933	negative regulation of protein phosphorylation	0.247666	-1.39568	1	20	2	0.00383142	522	10917	334584379907	Hrs,Mkp
GO:0031396	regulation of protein ubiquitination	0.247666	-1.39568	1	20	2	0.00383142	522	10917	3345831381	Hrs,rb
GO:0009072	aromatic amino acid family metabolic process	0.247666	-1.39568	1	20	2	0.00383142	522	10917	4252140263	e,CG11796
GO:0010623	developmental programmed cell death	0.248479	-1.3924	1	125	8	0.0153257	522	10917	4.00164e+39	skl,Eig71Ef,Obp99b,spin,Doa,Mmp1,Eig71Ed,santa-maria
GO:0019220	regulation of phosphate metabolic process	0.252278	-1.37722	1	277	16	0.0306513	522	10917	4.23564e+82	bnl,btl,Hrs,Mkk4,cno,CG13551,rad,Oct-TyrR,CG17124,CG6182,CG5916,Mkp,Hmgcr,Pvr,CG31467,CG11526
GO:0051174	regulation of phosphorus metabolic process	0.252278	-1.37722	1	277	16	0.0306513	522	10917	4.23564e+82	bnl,btl,Hrs,Mkk4,cno,CG13551,rad,Oct-TyrR,CG17124,CG6182,CG5916,Mkp,Hmgcr,Pvr,CG31467,CG11526
GO:0042327	positive regulation of phosphorylation	0.25235	-1.37694	1	89	6	0.0114943	522	10917	4.23564e+29	bnl,btl,Mkk4,Hmgcr,Pvr,CG11526
GO:0009117	nucleotide metabolic process	0.253291	-1.37322	1	258	15	0.0287356	522	10917	4.08484e+77	alphaTub84B,Mical,Rgk1,kappaB-Ras,Pde1c,CG17760,CG8080,ras,CG2246,Hmgcr,Prat2,Gyc-89Da,CG8417,dnc,Ppcs
GO:0008283	cell proliferation	0.254353	-1.36903	1	182	11	0.0210728	522	10917	4.06203e+56	cno,l(1)sc,otu,Adgf-A,orb,Syx5,eIF-4B,ds,Pvr,BicD,wor
GO:0000003	reproduction	0.254499	-1.36846	1	1232	64	0.122605	522	10917	45380,33661,39085,39151,41136,37808,43415,33672,31365,34594,35838,34966,32858,12798279,32245,39368,39150,42752,37220,34894,40133,42596,34636,39273,32165,34581,36699,31239,38999,40489,35762,246645,33260,8674007,40527,31011,36619,43873,3885660,31309,37619,39324,8674054,33458,39564,39205,31789,42803,32140,42295,117353,34524,53541,43385,3885578,31788,34127,35051,34545,33779,31033,41177,8673981,32353	spin,HP6,aay,Ilp3,RhoL,fzr2,Doa,Taf12L,CG15571,Pde1c,CG42326,Syx5,Cyp18a1,Acp98AB,fne,rols,Ilp2,orb,CG9975,yuri,ash1,how,Rab6,CG6168,regucalcin,spag4,Arf51F,egh,Cp15,mael,Nup44A,CG30486,CG3662,Sfp33A4,aux,Dredd,tra2,ras,CG34051,dnc,stl,Gr68a,Sfp23F,Hrs,btl,CG18628,otu,Hmgcr,p24-1,Ppcs,Cct1,aub,lectin-30A,Hrb98DE,CG42823,Cp38,Pvr,BicD,Gr32a,tomb,CG11664,eca,Sfp26Ad,mamo
GO:0006537	glutamate biosynthetic process	0.254758	-1.36744	1	6	1	0.00191571	522	10917	32625	P5CDh2
GO:0035039	male pronucleus assembly	0.254758	-1.36744	1	6	1	0.00191571	522	10917	32353	mamo
GO:0060004	reflex	0.254758	-1.36744	1	6	1	0.00191571	522	10917	36589	Ih
GO:0035094	response to nicotine	0.254758	-1.36744	1	6	1	0.00191571	522	10917	31168	moody
GO:0006476	protein deacetylation	0.254758	-1.36744	1	6	1	0.00191571	522	10917	326120	HdacX
GO:0046533	negative regulation of photoreceptor cell differentiation	0.254758	-1.36744	1	6	1	0.00191571	522	10917	33139	S6kII
GO:0010923	negative regulation of phosphatase activity	0.254758	-1.36744	1	6	1	0.00191571	522	10917	318751	CG31467
GO:0006207	'de novo' pyrimidine nucleobase biosynthetic process	0.254758	-1.36744	1	6	1	0.00191571	522	10917	40675	CRMP
GO:0032487	regulation of Rap protein signal transduction	0.254758	-1.36744	1	6	1	0.00191571	522	10917	32253	rad
GO:0008366	axon ensheathment	0.254758	-1.36744	1	6	1	0.00191571	522	10917	42596	how
GO:0007272	ensheathment of neurons	0.254758	-1.36744	1	6	1	0.00191571	522	10917	42596	how
GO:0090329	regulation of DNA-dependent DNA replication	0.254758	-1.36744	1	6	1	0.00191571	522	10917	31789	otu
GO:1901070	guanosine-containing compound biosynthetic process	0.254758	-1.36744	1	6	1	0.00191571	522	10917	43873	ras
GO:0019933	cAMP-mediated signaling	0.254758	-1.36744	1	6	1	0.00191571	522	10917	31309	dnc
GO:0051036	regulation of endosome size	0.254758	-1.36744	1	6	1	0.00191571	522	10917	32918	Hs3st-B
GO:0000038	very long-chain fatty acid metabolic process	0.254758	-1.36744	1	6	1	0.00191571	522	10917	326148	CG31523
GO:0006829	zinc ion transport	0.254758	-1.36744	1	6	1	0.00191571	522	10917	38407	ZnT63C
GO:0008015	blood circulation	0.254758	-1.36744	1	6	1	0.00191571	522	10917	36071	KCNQ
GO:0051567	histone H3-K9 methylation	0.254758	-1.36744	1	6	1	0.00191571	522	10917	39203	E(z)
GO:0015858	nucleoside transport	0.254758	-1.36744	1	6	1	0.00191571	522	10917	32008	Ant2
GO:0090136	epithelial cell-cell adhesion	0.254758	-1.36744	1	6	1	0.00191571	522	10917	31239	egh
GO:0007542	primary sex determination, germ-line	0.254758	-1.36744	1	6	1	0.00191571	522	10917	31789	otu
GO:0009608	response to symbiont	0.254758	-1.36744	1	6	1	0.00191571	522	10917	45318	kn
GO:0044745	amino acid transmembrane import	0.254758	-1.36744	1	6	1	0.00191571	522	10917	36331	CG8850
GO:0006189	'de novo' IMP biosynthetic process	0.254758	-1.36744	1	6	1	0.00191571	522	10917	38753	Prat2
GO:0046349	amino sugar biosynthetic process	0.254758	-1.36744	1	6	1	0.00191571	522	10917	33903	mmy
GO:0007637	proboscis extension reflex	0.254758	-1.36744	1	6	1	0.00191571	522	10917	36589	Ih
GO:0060047	heart contraction	0.254758	-1.36744	1	6	1	0.00191571	522	10917	36071	KCNQ
GO:0006368	transcription elongation from RNA polymerase II promoter	0.254758	-1.36744	1	6	1	0.00191571	522	10917	42749	EloA
GO:0048521	negative regulation of behavior	0.254758	-1.36744	1	6	1	0.00191571	522	10917	39150	Ilp2
GO:0006616	SRP-dependent cotranslational protein targeting to membrane, translocation	0.254758	-1.36744	1	6	1	0.00191571	522	10917	43034	CG10420
GO:0009226	nucleotide-sugar biosynthetic process	0.254758	-1.36744	1	6	1	0.00191571	522	10917	41192	CG8417
GO:0055069	zinc ion homeostasis	0.254758	-1.36744	1	6	1	0.00191571	522	10917	38407	ZnT63C
GO:0045317	equator specification	0.254758	-1.36744	1	6	1	0.00191571	522	10917	33245	ds
GO:0070584	mitochondrion morphogenesis	0.254758	-1.36744	1	6	1	0.00191571	522	10917	37912	Letm1
GO:0001838	embryonic epithelial tube formation	0.254758	-1.36744	1	6	1	0.00191571	522	10917	33903	mmy
GO:0019101	female somatic sex determination	0.254758	-1.36744	1	6	1	0.00191571	522	10917	36619	tra2
GO:0006084	acetyl-CoA metabolic process	0.254758	-1.36744	1	6	1	0.00191571	522	10917	36760	ATPCL
GO:0019856	pyrimidine nucleobase biosynthetic process	0.254758	-1.36744	1	6	1	0.00191571	522	10917	40675	CRMP
GO:0006415	translational termination	0.254758	-1.36744	1	6	1	0.00191571	522	10917	117365	HBS1
GO:0009266	response to temperature stimulus	0.255223	-1.36562	1	126	8	0.0153257	522	10917	4.28524e+39	Hsp68,Victoria,santa-maria,CG7130,TotA,TotM,Hdc,dnc
GO:0070838	divalent metal ion transport	0.25942	-1.34931	1	37	3	0.00574713	522	10917	452484066437912	Nckx30C,Itp-r83A,Letm1
GO:0071363	cellular response to growth factor stimulus	0.25942	-1.34931	1	37	3	0.00574713	522	10917	423563347439564	bnl,daw,btl
GO:0030431	sleep	0.25942	-1.34931	1	37	3	0.00574713	522	10917	391513915036589	Ilp3,Ilp2,Ih
GO:0072511	divalent inorganic cation transport	0.25942	-1.34931	1	37	3	0.00574713	522	10917	452484066437912	Nckx30C,Itp-r83A,Letm1
GO:0045087	innate immune response	0.260466	-1.34528	1	90	6	0.0114943	522	10917	4.19434e+29	Hel89B,RhoL,Pvr,Sp7,Dredd,kn
GO:0007314	oocyte anterior/posterior axis specification	0.260771	-1.34411	1	72	5	0.00957854	522	10917	4.04893e+24	mael,aub,BicD,Rab6,orb
GO:0044283	small molecule biosynthetic process	0.262023	-1.33932	1	127	8	0.0153257	522	10917	3.22851e+43	IP3K2,Cct1,CG31523,mld,pug,Gs1,P5CDh2,aay
GO:1901137	carbohydrate derivative biosynthetic process	0.26542	-1.32644	1	203	12	0.0229885	522	10917	3.60494e+59	CG2292,Arf79F,mmy,alpha-Man-I,Adgf-A,wol,Arf51F,ras,Prat2,CG8417,Gyc-89Da,Ppcs
GO:0090101	negative regulation of transmembrane receptor protein serine/threonine kinase signaling pathway	0.265706	-1.32537	1	21	2	0.00383142	522	10917	4277045380	Irk2,spin
GO:1903320	regulation of protein modification by small protein conjugation or removal	0.265706	-1.32537	1	21	2	0.00383142	522	10917	3345831381	Hrs,rb
GO:0022404	molting cycle process	0.265706	-1.32537	1	21	2	0.00383142	522	10917	4280342521	Hmgcr,e
GO:0006694	steroid biosynthetic process	0.265706	-1.32537	1	21	2	0.00383142	522	10917	328582768685	Cyp18a1,mld
GO:0060439	trachea morphogenesis	0.265706	-1.32537	1	21	2	0.00383142	522	10917	3956440149	btl,verm
GO:0006753	nucleoside phosphate metabolic process	0.267452	-1.31882	1	261	15	0.0287356	522	10917	4.08484e+77	alphaTub84B,Mical,Rgk1,kappaB-Ras,Pde1c,CG17760,CG8080,ras,CG2246,Hmgcr,Prat2,Gyc-89Da,CG8417,dnc,Ppcs
GO:0009725	response to hormone	0.268214	-1.31597	1	55	4	0.00766284	522	10917	3.91513e+19	Ilp3,Ilp6,Pvr,Ilp2
GO:0051188	cofactor biosynthetic process	0.268214	-1.31597	1	55	4	0.00766284	522	10917	3.59184e+19	CG8080,ATPCL,pug,Ppcs
GO:0007605	sensory perception of sound	0.268214	-1.31597	1	55	4	0.00766284	522	10917	3.77243e+21	bw,rempA,cp309,f
GO:0061564	axon development	0.268677	-1.31425	1	300	17	0.032567	522	10917	4.70804e+84	acj6,aay,daw,beat-Ia,ras,Rab6,Xe7,dnc,Glt,Mical,gt,mmy,Oli,exex,egh,E(z),wrapper
GO:0044255	cellular lipid metabolic process	0.268822	-1.31371	1	242	14	0.0268199	522	10917	3.81471e+71	CG9149,Cct1,CG17646,CG10131,CG2292,bmm,Dhap-at,Pdh,Sk1,fab1,Hmgcr,CG7789,CG31523,santa-maria
GO:0006887	exocytosis	0.269981	-1.30941	1	73	5	0.00957854	522	10917	3.34583e+24	Hrs,Rab6,rb,Slh,Syx5
GO:0019725	cellular homeostasis	0.270574	-1.30721	1	147	9	0.0172414	522	10917	4.06644e+44	Itp-r83A,CG11007,Syx5,ZnT63C,Fer3HCH,CG9911,ABCB7,Ctr1A,CG8993
GO:0023014	signal transduction by phosphorylation	0.272543	-1.29996	1	38	3	0.00574713	522	10917	410204062043415	Mkk4,cno,Doa
GO:0008202	steroid metabolic process	0.272543	-1.29996	1	38	3	0.00574713	522	10917	3.28583e+16	Cyp18a1,CG9518,mld
GO:0070848	response to growth factor	0.272543	-1.29996	1	38	3	0.00574713	522	10917	423563347439564	bnl,daw,btl
GO:0000165	MAPK cascade	0.272543	-1.29996	1	38	3	0.00574713	522	10917	410204062043415	Mkk4,cno,Doa
GO:0046578	regulation of Ras protein signal transduction	0.277356	-1.28245	1	167	10	0.0191571	522	10917	3.69294e+51	CG30456,Sbf,S6kII,rad,CG18659,CG6182,CG5916,Spec2,Hmgcr,CG11526
GO:0044710	single-organism metabolic process	0.279563	-1.27453	1	1875	95	0.181992	522	10917	43582,40620,38648,45883,41026,32625,33661,39085,41136,41303,41192,42788,33438,34064,41706,43415,34594,37724,32858,34024,41279,37139,33354,34786,42521,31957,44632,39611,42653,41384,37703,40133,42387,40263,31381,38956,41067,40675,41225,36049,36385,39976,39812,34134,36699,43516,38973,3772432,45524,35667,36624,32089,43873,36760,36378,39817,31309,38147,45783,33903,33172,37033,36020,42803,32416,39203,3…	Tpi,cno,scny,kar,CG8032,P5CDh2,HP6,aay,RhoL,CG4565,CG8417,CG10157,Cyp309a1,LKR,Cyp6d5,Doa,Pde1c,bw,Cyp18a1,santa-maria,pug,CG5493,CG17646,CAH1,e,alpha-Man-I,Cyp4e1,bmm,CG5346,CG10898,yellow-d,ash1,CG4836,CG11796,rb,CG13667,skap,CRMP,Mical,CG2292,CG17760,Adgf-A,Pdh,wol,Arf51F,CG7789,se,Adhr,Cyp4p1,kappaB-Ras,CG10131,Sk1,ras,ATPCL,Cyp301a1,CG4842,dnc,CG9149,Aats-val,mmy,Gs1,fab1,CG1516,Hmgcr,CG9518…
GO:1901136	carbohydrate derivative catabolic process	0.280749	-1.27029	1	111	7	0.01341	522	10917	4.08484e+37	alphaTub84B,kappaB-Ras,Rgk1,Gyc-89Da,PGRP-SB2,CG17760,Adgf-A
GO:0006612	protein targeting to membrane	0.283744	-1.25968	1	22	2	0.00383142	522	10917	3902843034	Srp68,CG10420
GO:2000145	regulation of cell motility	0.283744	-1.25968	1	22	2	0.00383142	522	10917	4235633458	bnl,Hrs
GO:0046008	regulation of female receptivity, post-mating	0.283744	-1.25968	1	22	2	0.00383142	522	10917	3123912798279	egh,Acp98AB
GO:0030334	regulation of cell migration	0.283744	-1.25968	1	22	2	0.00383142	522	10917	4235633458	bnl,Hrs
GO:0008103	oocyte microtubule cytoskeleton polarization	0.283744	-1.25968	1	22	2	0.00383142	522	10917	3505134636	BicD,Rab6
GO:0048518	positive regulation of biological process	0.285147	-1.25475	1	962	50	0.0957854	522	10917	38648,42749,47080,31011,32696,41136,31220,117365,42788,39564,33458,36929,41377,40835,31789,42452,45318,42803,32140,2768685,38412,36589,35927,30983,34524,39150,39611,42752,43385,33474,3355041,41943,40133,31003,34127,35051,34906,42356,41020,41427,40675,40790,33779,40506,40918,31350,41177,45574,32260,3355150	scny,EloA,acj6,Dredd,Arpc3B,RhoL,Ilp6,HBS1,CG10157,btl,Hrs,CG30456,sals,Antp,otu,Oct-TyrR,kn,Hmgcr,p24-1,mld,CG11526,Ih,Su(var)2-10,l(1)sc,aub,Ilp2,bmm,orb,Hrb98DE,daw,eIF-4B,Hel89B,ash1,vnd,Pvr,BicD,wor,bnl,Mkk4,Sbf,CRMP,TfIIFalpha,tomb,Arf79F,Sp7,lva,eca,ida,Fer3HCH,AGO3
GO:0042180	cellular ketone metabolic process	0.285734	-1.25269	1	39	3	0.00574713	522	10917	3.28583e+16	Cyp18a1,CG9518,mld
GO:0010001	glial cell differentiation	0.285734	-1.25269	1	39	3	0.00574713	522	10917	453803100331168	spin,vnd,moody
GO:0006812	cation transport	0.286755	-1.24913	1	265	15	0.0287356	522	10917	3.60714e+78	KCNQ,Irk2,Itp-r83A,Letm1,colt,CG42732,ZnT63C,Orct,Fer3HCH,Nckx30C,Nha1,Ctr1A,CG10864,Ih,CG42594
GO:0044763	single-organism cellular process	0.287581	-1.24625	1	4900	241	0.461686	522	10917	43582,38170,45380,38648,41835,45883,33661,39085,38255,41136,41303,35110,33062,41192,32008,35181,34064,41037,41377,43415,40835,40664,31365,34594,34966,45318,32858,37139,42836,32799,34786,39368,33230,3772382,37912,39150,33636,39611,5740325,34894,36430,41943,31003,36331,246552,39885,45234,40263,34636,45329,43428,34193,40675,40790,31227,34581,34678,36385,39976,33470,34352,34427,39812,34134,36699,3899…	Tpi,robl62A,spin,scny,CG31344,kar,HP6,aay,CG5687,RhoL,CG4565,amos,shakB,CG8417,Ant2,CG10702,LKR,CG8136,sals,Doa,Antp,Itp-r83A,CG15571,Pde1c,Syx5,kn,Cyp18a1,CG5493,CG31140,Frq2,CAH1,rols,rempA,cp309,Letm1,Ilp2,Atet,bmm,CG42732,yuri,CG13321,Hel89B,vnd,CG8850,CG30344,sinah,Ggamma30A,CG11796,Rab6,RpL12,Pkc98E,Glt,CRMP,TfIIFalpha,gt,spag4,CG5781,CG17760,Adgf-A,colt,RpL7,KdelR,Pdh,wol,Arf51F,Cp15,egh,F…
GO:0032259	methylation	0.288602	-1.24271	1	75	5	0.00957854	522	10917	3.40644e+25	LKR,CG4565,CG32152,ash1,E(z)
GO:0012501	programmed cell death	0.288632	-1.2426	1	188	11	0.0210728	522	10917	3.17644e+54	Corp,skl,Eig71Ef,Obp99b,spin,Doa,Mmp1,Dredd,Orct,Eig71Ed,santa-maria
GO:1901071	glucosamine-containing compound metabolic process	0.289735	-1.23879	1	131	8	0.0153257	522	10917	4.20804e+42	Mur89F,serp,CG42494,obst-H,mmy,CG32284,CG12009,verm
GO:0031401	positive regulation of protein modification process	0.289786	-1.23861	1	57	4	0.00766284	522	10917	4.23564e+19	bnl,btl,Hrs,Mkk4
GO:0021675	nerve development	0.290412	-1.23645	1	7	1	0.00191571	522	10917	41225	Mical
GO:0071229	cellular response to acid chemical	0.290412	-1.23645	1	7	1	0.00191571	522	10917	37122	CG5189
GO:0051780	behavioral response to nutrient	0.290412	-1.23645	1	7	1	0.00191571	522	10917	36589	Ih
GO:0006760	folic acid-containing compound metabolic process	0.290412	-1.23645	1	7	1	0.00191571	522	10917	41279	pug
GO:0072175	epithelial tube formation	0.290412	-1.23645	1	7	1	0.00191571	522	10917	33903	mmy
GO:0006354	DNA-templated transcription, elongation	0.290412	-1.23645	1	7	1	0.00191571	522	10917	42749	EloA
GO:0007516	hemocyte development	0.290412	-1.23645	1	7	1	0.00191571	522	10917	34127	Pvr
GO:0048260	positive regulation of receptor-mediated endocytosis	0.290412	-1.23645	1	7	1	0.00191571	522	10917	35051	BicD
GO:0009070	serine family amino acid biosynthetic process	0.290412	-1.23645	1	7	1	0.00191571	522	10917	39085	aay
GO:0043652	engulfment of apoptotic cell	0.290412	-1.23645	1	7	1	0.00191571	522	10917	39104	pall
GO:0046103	inosine biosynthetic process	0.290412	-1.23645	1	7	1	0.00191571	522	10917	39976	Adgf-A
GO:0019359	nicotinamide nucleotide biosynthetic process	0.290412	-1.23645	1	7	1	0.00191571	522	10917	35918	CG8080
GO:0035007	regulation of melanization defense response	0.290412	-1.23645	1	7	1	0.00191571	522	10917	40918	Sp7
GO:1990267	response to transition metal nanoparticle	0.290412	-1.23645	1	7	1	0.00191571	522	10917	44121	TotA
GO:0006826	iron ion transport	0.290412	-1.23645	1	7	1	0.00191571	522	10917	32260	Fer3HCH
GO:0006154	adenosine catabolic process	0.290412	-1.23645	1	7	1	0.00191571	522	10917	39976	Adgf-A
GO:0090263	positive regulation of canonical Wnt signaling pathway	0.290412	-1.23645	1	7	1	0.00191571	522	10917	41177	eca
GO:0019363	pyridine nucleotide biosynthetic process	0.290412	-1.23645	1	7	1	0.00191571	522	10917	35918	CG8080
GO:0007212	dopamine receptor signaling pathway	0.290412	-1.23645	1	7	1	0.00191571	522	10917	36385	CG17760
GO:0042073	intraciliary transport	0.290412	-1.23645	1	7	1	0.00191571	522	10917	33230	rempA
GO:0006560	proline metabolic process	0.290412	-1.23645	1	7	1	0.00191571	522	10917	32625	P5CDh2
GO:0060967	negative regulation of gene silencing by RNA	0.290412	-1.23645	1	7	1	0.00191571	522	10917	31381	rb
GO:0040036	regulation of fibroblast growth factor receptor signaling pathway	0.290412	-1.23645	1	7	1	0.00191571	522	10917	33458	Hrs
GO:0035193	larval central nervous system remodeling	0.290412	-1.23645	1	7	1	0.00191571	522	10917	45380	spin
GO:0046085	adenosine metabolic process	0.290412	-1.23645	1	7	1	0.00191571	522	10917	39976	Adgf-A
GO:0036335	intestinal stem cell homeostasis	0.290412	-1.23645	1	7	1	0.00191571	522	10917	34127	Pvr
GO:0046102	inosine metabolic process	0.290412	-1.23645	1	7	1	0.00191571	522	10917	39976	Adgf-A
GO:0046040	IMP metabolic process	0.290412	-1.23645	1	7	1	0.00191571	522	10917	38753	Prat2
GO:0043650	dicarboxylic acid biosynthetic process	0.290412	-1.23645	1	7	1	0.00191571	522	10917	32625	P5CDh2
GO:0009225	nucleotide-sugar metabolic process	0.290412	-1.23645	1	7	1	0.00191571	522	10917	41192	CG8417
GO:0043103	hypoxanthine salvage	0.290412	-1.23645	1	7	1	0.00191571	522	10917	39976	Adgf-A
GO:0046100	hypoxanthine metabolic process	0.290412	-1.23645	1	7	1	0.00191571	522	10917	39976	Adgf-A
GO:0033119	negative regulation of RNA splicing	0.290412	-1.23645	1	7	1	0.00191571	522	10917	43385	Hrb98DE
GO:0042308	negative regulation of protein import into nucleus	0.290412	-1.23645	1	7	1	0.00191571	522	10917	33139	S6kII
GO:0072529	pyrimidine-containing compound catabolic process	0.290412	-1.23645	1	7	1	0.00191571	522	10917	40675	CRMP
GO:0006034	cuticle chitin metabolic process	0.290412	-1.23645	1	7	1	0.00191571	522	10917	33903	mmy
GO:0018992	germ-line sex determination	0.290412	-1.23645	1	7	1	0.00191571	522	10917	31789	otu
GO:0019674	NAD metabolic process	0.290412	-1.23645	1	7	1	0.00191571	522	10917	35918	CG8080
GO:0048872	homeostasis of number of cells	0.290412	-1.23645	1	7	1	0.00191571	522	10917	34127	Pvr
GO:0046101	hypoxanthine biosynthetic process	0.290412	-1.23645	1	7	1	0.00191571	522	10917	39976	Adgf-A
GO:0002832	negative regulation of response to biotic stimulus	0.290412	-1.23645	1	7	1	0.00191571	522	10917	36769	casp
GO:0006188	IMP biosynthetic process	0.290412	-1.23645	1	7	1	0.00191571	522	10917	38753	Prat2
GO:1901362	organic cyclic compound biosynthetic process	0.290568	-1.23592	1	423	23	0.0440613	522	10917	4.25214e+116	e,CG7368,EloA,kar,ras,CG2246,yellow-d,Gyc-89Da,CG8417,rb,CRMP,TfIIFalpha,Taf12L,Adgf-A,CG8080,bw,Cyp18a1,Prat2,se,mld,yellow-k,pug,Ppcs
GO:0006935	chemotaxis	0.29165	-1.2322	1	266	15	0.0287356	522	10917	4.23563e+74	bnl,Glt,Mical,gt,acj6,Oli,aay,daw,ras,egh,beat-Ia,Hmgcr,E(z),Rab6,Xe7
GO:0042330	taxis	0.293021	-1.22751	1	325	18	0.0344828	522	10917	4.70804e+89	acj6,aay,daw,yuri,ras,beat-Ia,Rab6,Xe7,bnl,Glt,Mical,gt,Hdc,Oli,egh,Hmgcr,E(z),santa-maria
GO:0042592	homeostatic process	0.296571	-1.21547	1	267	15	0.0287356	522	10917	4.34154e+74	Doa,Itp-r83A,CG11007,Ilp2,bmm,Syx5,HP6,ZnT63C,Fer3HCH,CG9911,Pvr,ABCB7,CG8993,Ctr1A,Ppcs
GO:0006022	aminoglycan metabolic process	0.296612	-1.21533	1	151	9	0.0172414	522	10917	4.20804e+47	Mur89F,serp,mmy,PGRP-SB2,CG12009,verm,CG42494,obst-H,CG32284
GO:0006040	amino sugar metabolic process	0.296777	-1.21477	1	132	8	0.0153257	522	10917	4.20804e+42	Mur89F,serp,CG42494,obst-H,mmy,CG32284,CG12009,verm
GO:0032990	cell part morphogenesis	0.29698	-1.21409	1	584	31	0.059387	522	10917	3.32304e+156	rempA,Aats-gly,Letm1,acj6,CG42732,aay,daw,beat-Ia,ras,amos,CG4842,Rab6,wor,Xe7,dnc,bnl,Pkc98E,Irk2,Mkk4,Glt,Mical,gt,lva,Oli,kn,exex,egh,Nckx30C,E(z),wrapper,CG3259
GO:0072522	purine-containing compound biosynthetic process	0.297999	-1.21066	1	76	5	0.00957854	522	10917	4.38734e+24	ras,Prat2,Gyc-89Da,Adgf-A,Ppcs
GO:0008358	maternal determination of anterior/posterior axis, embryo	0.297999	-1.21066	1	76	5	0.00957854	522	10917	4.04893e+24	mael,aub,BicD,Rab6,orb
GO:0046331	lateral inhibition	0.298424	-1.20924	1	209	12	0.0229885	522	10917	3.34384e+59	Cyp309a1,CG8136,pcx,stv,Dnz1,Osi7,exex,CG9518,Xe7,CG31140,dnc,wor
GO:0045168	cell-cell signaling involved in cell fate commitment	0.298424	-1.20924	1	209	12	0.0229885	522	10917	3.34384e+59	Cyp309a1,CG8136,pcx,stv,Dnz1,Osi7,exex,CG9518,Xe7,CG31140,dnc,wor
GO:0090092	regulation of transmembrane receptor protein serine/threonine kinase signaling pathway	0.298975	-1.2074	1	40	3	0.00574713	522	10917	334744277045380	daw,Irk2,spin
GO:0006418	tRNA aminoacylation for protein translation	0.298975	-1.2074	1	40	3	0.00574713	522	10917	398293964445783	Aats-tyr,Aats-gly,Aats-val
GO:1901576	organic substance biosynthetic process	0.299278	-1.20638	1	1089	56	0.10728	522	10917	37580,41343,39301,34503,42749,45883,32625,39085,32635,43873,36760,117365,41192,43564,37849,39338,45783,33672,33903,33172,37724,32858,42803,36020,2768685,41279,39678,42295,117353,32285,42521,39644,31957,31613,3355041,39829,43637,37703,42001,31381,45329,40675,39518,40790,36049,40506,34352,39976,53586,34134,36699,35918,38753,326148,38973,36570	RpS16,RpS25,CG7368,Dnz1,EloA,kar,P5CDh2,aay,RpS19a,ras,ATPCL,HBS1,CG8417,RpS28a,RpL39,RpL10Ab,Aats-val,Taf12L,mmy,Gs1,bw,Cyp18a1,Hmgcr,CG1516,mld,pug,yellow-k,Ppcs,Cct1,IP3K2,e,Aats-gly,alpha-Man-I,RpL17,eIF-4B,Aats-tyr,CG2246,yellow-d,Gyc-89Da,rb,RpL12,CRMP,stv,TfIIFalpha,CG2292,Arf79F,RpL7,Adgf-A,Dhap-at,wol,Arf51F,CG8080,Prat2,CG31523,se,mRpS16
GO:0006793	phosphorus metabolic process	0.301026	-1.20056	1	766	40	0.0766284	522	10917	4.06204e+207	cno,kappaB-Ras,aux,Sk1,ras,ATPCL,CG8417,dnc,CG10702,btl,Doa,Pde1c,Hmgcr,fab1,Ppcs,CG31140,Cct1,alphaTub84B,IP3K2,CG4629,yata,CG2246,Pvr,Gyc-89Da,Pp1-Y2,Pkc98E,CG32812,Mkk4,Sbf,Mical,Rgk1,CG2292,S6kII,CG17760,CG8080,Mkp,CG7789,Prat2,PKD,cdc14
GO:0006891	intra-Golgi vesicle-mediated transport	0.30174	-1.19819	1	23	2	0.00383142	522	10917	4284336492	KrT95D,cbs
GO:0042386	hemocyte differentiation	0.30174	-1.19819	1	23	2	0.00383142	522	10917	3412739976	Pvr,Adgf-A
GO:0072524	pyridine-containing compound metabolic process	0.30174	-1.19819	1	23	2	0.00383142	522	10917	3591841225	CG8080,Mical
GO:0072503	cellular divalent inorganic cation homeostasis	0.30174	-1.19819	1	23	2	0.00383142	522	10917	3840740664	ZnT63C,Itp-r83A
GO:0045187	regulation of circadian sleep/wake cycle, sleep	0.30174	-1.19819	1	23	2	0.00383142	522	10917	276868536589	mld,Ih
GO:0006900	membrane budding	0.30174	-1.19819	1	23	2	0.00383142	522	10917	3138140221	rb,Clc
GO:0006733	oxidoreduction coenzyme metabolic process	0.30174	-1.19819	1	23	2	0.00383142	522	10917	3591841225	CG8080,Mical
GO:0006963	positive regulation of antibacterial peptide biosynthetic process	0.30174	-1.19819	1	23	2	0.00383142	522	10917	4194331011	Hel89B,Dredd
GO:0035272	exocrine system development	0.301987	-1.19737	1	171	10	0.0191571	522	10917	3.95644e+49	btl,slv,Eig71Ef,Obp99b,Doa,gt,Mmp1,Eig71Ed,Pvr,santa-maria
GO:0007431	salivary gland development	0.301987	-1.19737	1	171	10	0.0191571	522	10917	3.95644e+49	btl,slv,Eig71Ef,Obp99b,Doa,gt,Mmp1,Eig71Ed,Pvr,santa-maria
GO:1901565	organonitrogen compound catabolic process	0.303219	-1.1933	1	152	9	0.0172414	522	10917	4.08484e+47	alphaTub84B,CRMP,kappaB-Ras,Rgk1,PGRP-SB2,CG17760,P5CDh2,Adgf-A,Gyc-89Da
GO:1901361	organic cyclic compound catabolic process	0.303219	-1.1933	1	152	9	0.0172414	522	10917	4.08484e+47	alphaTub84B,CRMP,kappaB-Ras,Rgk1,CG17760,P5CDh2,Adgf-A,Cyp18a1,Gyc-89Da
GO:0007635	chemosensory behavior	0.303609	-1.19202	1	114	7	0.01341	522	10917	4.34973e+34	Obp99b,Pino,rad,acj6,Ih,CG9664,dnc
GO:0023051	regulation of signaling	0.308866	-1.17485	1	688	36	0.0689655	522	10917	3.67694e+185	casp,cno,spin,kappaB-Ras,CG6182,CG5916,CG34408,dnc,btl,Hrs,CG30456,Oct-TyrR,kn,Spec2,Hmgcr,p24-1,CG11526,Su(var)2-10,Frq2,CG3822,Frq1,CG18659,daw,eIF-4B,Pvr,BicD,bnl,Irk2,Sbf,Mkk4,CRMP,S6kII,rad,eca,Fer3HCH,Mkp
GO:0001667	ameboidal cell migration	0.309861	-1.17163	1	153	9	0.0172414	522	10917	4.23564e+44	bnl,btl,Hrs,egh,RhoL,rols,how,Pvr,Ppcs
GO:1902580	single-organism cellular localization	0.310978	-1.16803	1	134	8	0.0153257	522	10917	4.06203e+39	cno,aub,orb,Srp68,mael,Rab6,CG10420,BicD
GO:1902578	single-organism localization	0.310978	-1.16803	1	134	8	0.0153257	522	10917	4.06203e+39	cno,aub,orb,Srp68,mael,Rab6,CG10420,BicD
GO:0002831	regulation of response to biotic stimulus	0.311585	-1.16608	1	59	4	0.00766284	522	10917	3.67694e+19	casp,Hel89B,Dredd,CG10157
GO:0007028	cytoplasm organization	0.311585	-1.16608	1	59	4	0.00766284	522	10917	4.04893e+19	mael,aub,Rab6,orb
GO:0019752	carboxylic acid metabolic process	0.311975	-1.16483	1	349	19	0.0363985	522	10917	4.35824e+95	Tpi,Aats-gly,e,CG10131,P5CDh2,aay,Aats-tyr,ATPCL,CG11796,CG9149,Aats-val,Gs1,Hdc,CG1516,se,CG31523,pug,PH4alphaEFB,CG5493
GO:0043039	tRNA aminoacylation	0.312248	-1.16396	1	41	3	0.00574713	522	10917	398293964445783	Aats-tyr,Aats-gly,Aats-val
GO:0008219	cell death	0.318151	-1.14523	1	193	11	0.0210728	522	10917	3.17644e+54	Corp,skl,Eig71Ef,Obp99b,spin,Doa,Mmp1,Dredd,Orct,Eig71Ed,santa-maria
GO:0055114	oxidation-reduction process	0.318161	-1.1452	1	530	28	0.0536398	522	10917	4.55244e+141	Cyp4p1,CG10131,CG5321,CG8032,Cyp4e1,P5CDh2,CG5346,ras,Cyp301a1,CG4836,CG4842,CG11796,CG13667,CG10157,skap,LKR,Cyp309a1,Cyp6d5,CG9149,Mical,Pdh,Cyp18a1,Hmgcr,CG9518,Adhr,pug,PH4alphaEFB,CG5493
GO:0007613	memory	0.318906	-1.14286	1	97	6	0.0114943	522	10917	4.34284e+31	Pkc98E,CRMP,svr,mld,rad,dnc
GO:0030866	cortical actin cytoskeleton organization	0.319655	-1.14051	1	24	2	0.00383142	522	10917	4142731168	Sbf,moody
GO:0007097	nuclear migration	0.319655	-1.14051	1	24	2	0.00383142	522	10917	4048935051	mael,BicD
GO:0031325	positive regulation of cellular metabolic process	0.322282	-1.13233	1	471	25	0.0478927	522	10917	3.09833e+126	l(1)sc,aub,EloA,acj6,Dredd,Hrb98DE,orb,Hel89B,vnd,ash1,Pvr,wor,bnl,btl,Hrs,Mkk4,Sbf,TfIIFalpha,tomb,Antp,Sp7,otu,Hmgcr,AGO3,CG11526
GO:0000381	regulation of alternative mRNA splicing, via spliceosome	0.322543	-1.13152	1	60	4	0.00766284	522	10917	3.66194e+19	tra2,Doa,how,Hrb98DE
GO:0002520	immune system development	0.322543	-1.13152	1	60	4	0.00766284	522	10917	4.11364e+19	RhoL,Antp,Pvr,Su(var)2-10
GO:0048534	hematopoietic or lymphoid organ development	0.322543	-1.13152	1	60	4	0.00766284	522	10917	4.11364e+19	RhoL,Antp,Pvr,Su(var)2-10
GO:0051147	regulation of muscle cell differentiation	0.324363	-1.12589	1	8	1	0.00191571	522	10917	41377	sals
GO:0035384	thioester biosynthetic process	0.324363	-1.12589	1	8	1	0.00191571	522	10917	36760	ATPCL
GO:0048096	chromatin-mediated maintenance of transcription	0.324363	-1.12589	1	8	1	0.00191571	522	10917	40133	ash1
GO:0016578	histone deubiquitination	0.324363	-1.12589	1	8	1	0.00191571	522	10917	38648	scny
GO:0033619	membrane protein proteolysis	0.324363	-1.12589	1	8	1	0.00191571	522	10917	33458	Hrs
GO:1902115	regulation of organelle assembly	0.324363	-1.12589	1	8	1	0.00191571	522	10917	41377	sals
GO:0043096	purine nucleobase salvage	0.324363	-1.12589	1	8	1	0.00191571	522	10917	39976	Adgf-A
GO:0022409	positive regulation of cell-cell adhesion	0.324363	-1.12589	1	8	1	0.00191571	522	10917	41136	RhoL
GO:0098732	macromolecule deacylation	0.324363	-1.12589	1	8	1	0.00191571	522	10917	326120	HdacX
GO:1902803	regulation of synaptic vesicle transport	0.324363	-1.12589	1	8	1	0.00191571	522	10917	35051	BicD
GO:0046605	regulation of centrosome cycle	0.324363	-1.12589	1	8	1	0.00191571	522	10917	41067	skap
GO:0007561	imaginal disc eversion	0.324363	-1.12589	1	8	1	0.00191571	522	10917	37949	Mmp1
GO:0051153	regulation of striated muscle cell differentiation	0.324363	-1.12589	1	8	1	0.00191571	522	10917	41377	sals
GO:0006570	tyrosine metabolic process	0.324363	-1.12589	1	8	1	0.00191571	522	10917	42521	e
GO:0010496	intercellular transport	0.324363	-1.12589	1	8	1	0.00191571	522	10917	33062	shakB
GO:0071616	acyl-CoA biosynthetic process	0.324363	-1.12589	1	8	1	0.00191571	522	10917	36760	ATPCL
GO:0060326	cell chemotaxis	0.324363	-1.12589	1	8	1	0.00191571	522	10917	42803	Hmgcr
GO:0045752	positive regulation of Toll signaling pathway	0.324363	-1.12589	1	8	1	0.00191571	522	10917	33458	Hrs
GO:2000377	regulation of reactive oxygen species metabolic process	0.324363	-1.12589	1	8	1	0.00191571	522	10917	37755	Sesn
GO:0007438	oenocyte development	0.324363	-1.12589	1	8	1	0.00191571	522	10917	42596	how
GO:0035601	protein deacylation	0.324363	-1.12589	1	8	1	0.00191571	522	10917	326120	HdacX
GO:0050775	positive regulation of dendrite morphogenesis	0.324363	-1.12589	1	8	1	0.00191571	522	10917	31350	lva
GO:0008078	mesodermal cell migration	0.324363	-1.12589	1	8	1	0.00191571	522	10917	42596	how
GO:0006541	glutamine metabolic process	0.324363	-1.12589	1	8	1	0.00191571	522	10917	33172	Gs1
GO:0043506	regulation of JUN kinase activity	0.324363	-1.12589	1	8	1	0.00191571	522	10917	41020	Mkk4
GO:0010578	regulation of adenylate cyclase activity involved in G-protein coupled receptor signaling pathway	0.324363	-1.12589	1	8	1	0.00191571	522	10917	42452	Oct-TyrR
GO:0009415	response to water	0.324363	-1.12589	1	8	1	0.00191571	522	10917	44121	TotA
GO:0071241	cellular response to inorganic substance	0.324363	-1.12589	1	8	1	0.00191571	522	10917	45234	Ggamma30A
GO:0035292	specification of segmental identity, trunk	0.324363	-1.12589	1	8	1	0.00191571	522	10917	40835	Antp
GO:0034248	regulation of cellular amide metabolic process	0.325535	-1.12229	1	42	3	0.00574713	522	10917	367694194331011	casp,Hel89B,Dredd
GO:0014016	neuroblast differentiation	0.325535	-1.12229	1	42	3	0.00574713	522	10917	310033098340835	vnd,l(1)sc,Antp
GO:0002805	regulation of antimicrobial peptide biosynthetic process	0.325535	-1.12229	1	42	3	0.00574713	522	10917	367694194331011	casp,Hel89B,Dredd
GO:0042325	regulation of phosphorylation	0.327142	-1.11736	1	175	10	0.0191571	522	10917	4.23564e+51	bnl,btl,Hrs,Mkk4,cno,CG17124,Mkp,Hmgcr,Pvr,CG11526
GO:0007409	axonogenesis	0.327726	-1.11558	1	293	16	0.0306513	522	10917	4.70804e+79	acj6,aay,daw,beat-Ia,ras,Rab6,Xe7,dnc,Glt,Mical,gt,Oli,exex,egh,E(z),wrapper
GO:0006796	phosphate-containing compound metabolic process	0.328924	-1.11193	1	755	39	0.0747126	522	10917	4.06204e+202	cno,kappaB-Ras,aux,Sk1,ras,CG8417,dnc,CG10702,btl,Doa,Pde1c,Hmgcr,fab1,Ppcs,CG31140,Cct1,alphaTub84B,IP3K2,CG4629,yata,CG2246,Pvr,Gyc-89Da,Pp1-Y2,Pkc98E,CG32812,Mkk4,Sbf,Mical,Rgk1,CG2292,S6kII,CG17760,CG8080,Mkp,CG7789,Prat2,PKD,cdc14
GO:0048732	gland development	0.330152	-1.1082	1	195	11	0.0210728	522	10917	3.95644e+54	btl,slv,Eig71Ef,Obp99b,Doa,gt,Antp,Mmp1,Eig71Ed,Pvr,santa-maria
GO:0007267	cell-cell signaling	0.332736	-1.10041	1	534	28	0.0536398	522	10917	3.27994e+139	Frq2,CG3822,spin,Dnz1,Osi7,aux,Frq1,Letm1,Clc,Rab6,BicD,rb,wor,Xe7,dnc,Cyp309a1,CG8136,Hrs,pcx,stv,Arf79F,Syx5,kn,exex,Arf51F,Sytalpha,CG9518,CG31140
GO:0016570	histone modification	0.335985	-1.09069	1	99	6	0.0114943	522	10917	3.2612e+30	HdacX,LKR,CG4565,ash1,E(z),scny
GO:0016569	covalent chromatin modification	0.335985	-1.09069	1	99	6	0.0114943	522	10917	3.2612e+30	HdacX,LKR,CG4565,ash1,scny,E(z)
GO:0046434	organophosphate catabolic process	0.336014	-1.0906	1	80	5	0.00957854	522	10917	4.08484e+27	alphaTub84B,kappaB-Ras,Rgk1,Gyc-89Da,CG17760
GO:0007186	G-protein coupled receptor signaling pathway	0.336189	-1.09008	1	196	11	0.0210728	522	10917	3.11684e+54	moody,CG13575,Itp-r83A,Oct-TyrR,CG17760,GABA-B-R3,Sk1,Ggamma30A,CCKLR-17D3,mthl2,CG31140
GO:0050768	negative regulation of neurogenesis	0.337457	-1.08632	1	25	2	0.00383142	522	10917	3956432918	btl,Hs3st-B
GO:0007426	tracheal outgrowth, open tracheal system	0.337457	-1.08632	1	25	2	0.00383142	522	10917	4235639564	bnl,btl
GO:0030717	karyosome formation	0.337457	-1.08632	1	25	2	0.00383142	522	10917	4341534524	Doa,aub
GO:0040018	positive regulation of multicellular organism growth	0.337457	-1.08632	1	25	2	0.00383142	522	10917	3122039150	Ilp6,Ilp2
GO:0045610	regulation of hemocyte differentiation	0.337457	-1.08632	1	25	2	0.00383142	522	10917	3412745318	Pvr,kn
GO:0051495	positive regulation of cytoskeleton organization	0.337457	-1.08632	1	25	2	0.00383142	522	10917	3269641377	Arpc3B,sals
GO:0090068	positive regulation of cell cycle process	0.337457	-1.08632	1	25	2	0.00383142	522	10917	4557431789	ida,otu
GO:0010646	regulation of cell communication	0.337686	-1.08564	1	697	36	0.0689655	522	10917	3.67694e+185	casp,cno,spin,kappaB-Ras,CG6182,CG5916,CG34408,dnc,btl,Hrs,CG30456,Oct-TyrR,kn,Spec2,Hmgcr,p24-1,CG11526,Su(var)2-10,Frq2,CG3822,Frq1,CG18659,daw,eIF-4B,Pvr,BicD,bnl,Irk2,Sbf,Mkk4,CRMP,S6kII,rad,eca,Fer3HCH,Mkp
GO:0002700	regulation of production of molecular mediator of immune response	0.338821	-1.08228	1	43	3	0.00574713	522	10917	367694194331011	casp,Hel89B,Dredd
GO:0000768	syncytium formation by plasma membrane fusion	0.338821	-1.08228	1	43	3	0.00574713	522	10917	366994358239368	Arf51F,Tpi,rols
GO:0006949	syncytium formation	0.338821	-1.08228	1	43	3	0.00574713	522	10917	366994358239368	Arf51F,Tpi,rols
GO:0007520	myoblast fusion	0.338821	-1.08228	1	43	3	0.00574713	522	10917	366994358239368	Arf51F,Tpi,rols
GO:0040014	regulation of multicellular organism growth	0.338821	-1.08228	1	43	3	0.00574713	522	10917	312203122739150	Ilp6,gt,Ilp2
GO:0002784	regulation of antimicrobial peptide production	0.338821	-1.08228	1	43	3	0.00574713	522	10917	367694194331011	casp,Hel89B,Dredd
GO:0016265	death	0.342246	-1.07223	1	197	11	0.0210728	522	10917	3.17644e+54	Corp,skl,Eig71Ef,Obp99b,spin,Doa,Mmp1,Dredd,Orct,Eig71Ed,santa-maria
GO:0006508	proteolysis	0.343264	-1.06926	1	719	37	0.0708812	522	10917	3.17764e+191	CG1440,CG11192,CG34043,CG11459,scny,Dredd,jet,CG3775,CG4650,fzr2,stl,Hrs,Fur1,CG30002,Nep4,CG8213,CG4661,CG6763,CG5849,CG18735,CG11110,mas,Mmp1,svr,sinah,CG31219,CG6067,pall,CG3700,CG6168,stv,CG11664,Sp7,CG42370,CG34409,CG33128,Ubi-p5E
GO:0090130	tissue migration	0.343514	-1.06853	1	158	9	0.0172414	522	10917	4.23564e+44	bnl,btl,Hrs,egh,RhoL,rols,how,Pvr,Ppcs
GO:0009152	purine ribonucleotide biosynthetic process	0.344529	-1.06558	1	62	4	0.00766284	522	10917	4.38734e+19	ras,Prat2,Gyc-89Da,Ppcs
GO:0008361	regulation of cell size	0.344529	-1.06558	1	62	4	0.00766284	522	10917	3.95643e+19	btl,gt,Ilp2,Syx5
GO:0045937	positive regulation of phosphate metabolic process	0.344565	-1.06547	1	100	6	0.0114943	522	10917	4.23564e+29	bnl,btl,Mkk4,Hmgcr,Pvr,CG11526
GO:0010562	positive regulation of phosphorus metabolic process	0.344565	-1.06547	1	100	6	0.0114943	522	10917	4.23564e+29	bnl,btl,Mkk4,Hmgcr,Pvr,CG11526
GO:0016271	tissue death	0.344565	-1.06547	1	100	6	0.0114943	522	10917	3.97044e+29	Eig71Ed,Eig71Ef,Obp99b,Doa,santa-maria,Mmp1
GO:0007559	histolysis	0.344565	-1.06547	1	100	6	0.0114943	522	10917	3.97044e+29	Eig71Ed,Eig71Ef,Obp99b,Doa,santa-maria,Mmp1
GO:0031175	neuron projection development	0.347495	-1.05701	1	538	28	0.0536398	522	10917	3.96445e+141	Aats-gly,acj6,CG42732,aay,daw,beat-Ia,ras,amos,CG4842,Rab6,Xe7,wor,dnc,Pkc98E,Irk2,Mkk4,Glt,Mical,gt,mmy,lva,Oli,kn,exex,egh,Nckx30C,E(z),wrapper
GO:0048858	cell projection morphogenesis	0.349555	-1.05109	1	579	30	0.0574713	522	10917	3.32304e+151	rempA,Aats-gly,acj6,CG42732,aay,daw,beat-Ia,ras,amos,CG4842,Rab6,wor,Xe7,dnc,bnl,Pkc98E,Irk2,Mkk4,Glt,Mical,gt,lva,Oli,kn,exex,egh,Nckx30C,E(z),wrapper,CG3259
GO:0007310	oocyte dorsal/ventral axis specification	0.35209	-1.04387	1	44	3	0.00574713	522	10917	404893505142752	mael,BicD,orb
GO:0034613	cellular protein localization	0.352429	-1.04291	1	298	16	0.0306513	522	10917	3.73374e+79	CG11110,cbs,Clc,Slh,rb,Clbn,Hrs,Vps26,Syx5,KdelR,KrT95D,Srp68,Myo10A,CG10420,CG10144,Nup44A
GO:0040011	locomotion	0.354052	-1.03831	1	560	29	0.0555556	522	10917	4.53804e+146	spin,rols,cp309,acj6,aay,daw,yuri,ras,beat-Ia,RhoL,how,Pvr,Rab6,Xe7,bnl,btl,Hrs,Glt,Mical,Doa,gt,spag4,Oli,Hdc,egh,Hmgcr,E(z),santa-maria,Ppcs
GO:0009411	response to UV	0.355115	-1.03531	1	26	2	0.00383142	522	10917	3527544121	Victoria,TotA
GO:0007187	G-protein coupled receptor signaling pathway, coupled to cyclic nucleotide second messenger	0.355115	-1.03531	1	26	2	0.00383142	522	10917	4245236385	Oct-TyrR,CG17760
GO:0045861	negative regulation of proteolysis	0.355115	-1.03531	1	26	2	0.00383142	522	10917	867405436769	Sfp23F,casp
GO:0007188	adenylate cyclase-modulating G-protein coupled receptor signaling pathway	0.355115	-1.03531	1	26	2	0.00383142	522	10917	4245236385	Oct-TyrR,CG17760
GO:0009064	glutamine family amino acid metabolic process	0.355115	-1.03531	1	26	2	0.00383142	522	10917	3317232625	Gs1,P5CDh2
GO:0042749	regulation of circadian sleep/wake cycle	0.355115	-1.03531	1	26	2	0.00383142	522	10917	276868536589	mld,Ih
GO:0035162	embryonic hemopoiesis	0.355115	-1.03531	1	26	2	0.00383142	522	10917	4113634127	RhoL,Pvr
GO:0016043	cellular component organization	0.355276	-1.03486	1	2284	113	0.216475	522	10917	37580,40620,45380,38648,33661,39085,32696,37663,41303,35110,37808,33062,34064,41377,43415,40664,33672,31365,35066,34966,45318,32028,32799,39368,33230,36492,3772382,37912,39150,37949,40221,42752,5740325,34894,34947,40133,42596,34636,31381,34906,41067,45329,43428,41427,34193,31168,41225,31227,34678,33470,34352,34134,36699,31239,38999,39028,40489,38193,40527,47080,36619,43873,32918,32130,39817,11736…	RpS16,cno,spin,scny,HP6,aay,Arpc3B,CG3085,CG4565,amos,fzr2,shakB,LKR,sals,Doa,Itp-r83A,Taf12L,CG15571,Oli,Syx5,kn,Myo10A,Frq2,rols,rempA,cbs,cp309,Letm1,Ilp2,Mmp1,Clc,orb,CG42732,yuri,beat-Ia,ash1,how,Rab6,rb,wor,skap,RpL12,Pkc98E,Sbf,Glt,moody,Mical,gt,CG5781,colt,RpL7,wol,Arf51F,egh,Cp15,Srp68,mael,ABCB7,aux,acj6,tra2,ras,Hs3st-B,dy,CG4842,HBS1,dnc,stl,btl,Hrs,RpL39,RpL10Ab,pcx,mmy,otu,Gs1,exex…
GO:0060560	developmental growth involved in morphogenesis	0.355539	-1.03412	1	63	4	0.00766284	522	10917	4.06204e+19	cno,Mmp1,verm,dnc
GO:0048259	regulation of receptor-mediated endocytosis	0.356692	-1.03088	1	9	1	0.00191571	522	10917	35051	BicD
GO:0009065	glutamine family amino acid catabolic process	0.356692	-1.03088	1	9	1	0.00191571	522	10917	32625	P5CDh2
GO:0061382	Malpighian tubule tip cell differentiation	0.356692	-1.03088	1	9	1	0.00191571	522	10917	30983	l(1)sc
GO:0001746	Bolwig's organ morphogenesis	0.356692	-1.03088	1	9	1	0.00191571	522	10917	34947	beat-Ia
GO:0019184	nonribosomal peptide biosynthetic process	0.356692	-1.03088	1	9	1	0.00191571	522	10917	42521	e
GO:0006862	nucleotide transport	0.356692	-1.03088	1	9	1	0.00191571	522	10917	32008	Ant2
GO:0008054	cyclin catabolic process	0.356692	-1.03088	1	9	1	0.00191571	522	10917	37808	fzr2
GO:0045842	positive regulation of mitotic metaphase/anaphase transition	0.356692	-1.03088	1	9	1	0.00191571	522	10917	45574	ida
GO:0007615	anesthesia-resistant memory	0.356692	-1.03088	1	9	1	0.00191571	522	10917	32253	rad
GO:0042810	pheromone metabolic process	0.356692	-1.03088	1	9	1	0.00191571	522	10917	39203	E(z)
GO:0045840	positive regulation of mitosis	0.356692	-1.03088	1	9	1	0.00191571	522	10917	45574	ida
GO:0040015	negative regulation of multicellular organism growth	0.356692	-1.03088	1	9	1	0.00191571	522	10917	31227	gt
GO:0032856	activation of Ras GTPase activity	0.356692	-1.03088	1	9	1	0.00191571	522	10917	32253	rad
GO:0010921	regulation of phosphatase activity	0.356692	-1.03088	1	9	1	0.00191571	522	10917	318751	CG31467
GO:0007593	chitin-based cuticle sclerotization	0.356692	-1.03088	1	9	1	0.00191571	522	10917	42521	e
GO:0055034	Bolwig's organ development	0.356692	-1.03088	1	9	1	0.00191571	522	10917	34947	beat-Ia
GO:0090317	negative regulation of intracellular protein transport	0.356692	-1.03088	1	9	1	0.00191571	522	10917	33139	S6kII
GO:0045477	regulation of nurse cell apoptotic process	0.356692	-1.03088	1	9	1	0.00191571	522	10917	45380	spin
GO:0045785	positive regulation of cell adhesion	0.356692	-1.03088	1	9	1	0.00191571	522	10917	41136	RhoL
GO:0007488	histoblast morphogenesis	0.356692	-1.03088	1	9	1	0.00191571	522	10917	36378	Cyp301a1
GO:0048148	behavioral response to cocaine	0.356692	-1.03088	1	9	1	0.00191571	522	10917	31168	moody
GO:0036099	female germ-line stem cell maintenance	0.356692	-1.03088	1	9	1	0.00191571	522	10917	43385	Hrb98DE
GO:0048580	regulation of post-embryonic development	0.356692	-1.03088	1	9	1	0.00191571	522	10917	45318	kn
GO:0072347	response to anesthetic	0.356692	-1.03088	1	9	1	0.00191571	522	10917	31957	alpha-Man-I
GO:0043153	entrainment of circadian clock by photoperiod	0.356692	-1.03088	1	9	1	0.00191571	522	10917	33705	jet
GO:0016063	rhodopsin biosynthetic process	0.356692	-1.03088	1	9	1	0.00191571	522	10917	34024	santa-maria
GO:0030516	regulation of axon extension	0.356692	-1.03088	1	9	1	0.00191571	522	10917	39564	btl
GO:0061387	regulation of extent of cell growth	0.356692	-1.03088	1	9	1	0.00191571	522	10917	39564	btl
GO:0043647	inositol phosphate metabolic process	0.356692	-1.03088	1	9	1	0.00191571	522	10917	32285	IP3K2
GO:0001742	oenocyte differentiation	0.356692	-1.03088	1	9	1	0.00191571	522	10917	42596	how
GO:1902101	positive regulation of metaphase/anaphase transition of cell cycle	0.356692	-1.03088	1	9	1	0.00191571	522	10917	45574	ida
GO:0006611	protein export from nucleus	0.356692	-1.03088	1	9	1	0.00191571	522	10917	43018	Clbn
GO:0043043	peptide biosynthetic process	0.356692	-1.03088	1	9	1	0.00191571	522	10917	42521	e
GO:0046823	negative regulation of nucleocytoplasmic transport	0.356692	-1.03088	1	9	1	0.00191571	522	10917	33139	S6kII
GO:0006206	pyrimidine nucleobase metabolic process	0.356692	-1.03088	1	9	1	0.00191571	522	10917	40675	CRMP
GO:0016204	determination of muscle attachment site	0.356692	-1.03088	1	9	1	0.00191571	522	10917	45318	kn
GO:0007297	ovarian follicle cell migration	0.358188	-1.0267	1	121	7	0.01341	522	10917	3.34583e+34	Hrs,egh,btl,RhoL,rols,Pvr,Ppcs
GO:0051246	regulation of protein metabolic process	0.362196	-1.01557	1	320	17	0.032567	522	10917	3.67693e+90	casp,aub,Hrb98DE,orb,rb,LKR,bnl,Sfp23F,Hrs,btl,Mkk4,Pde1c,ida,bru-3,Mkp,CG34454,Su(var)2-10
GO:0007293	germarium-derived egg chamber formation	0.36479	-1.00843	1	83	5	0.00957854	522	10917	3.12393e+24	egh,Rab6,BicD,orb,Ppcs
GO:0010563	negative regulation of phosphorus metabolic process	0.365327	-1.00696	1	45	3	0.00574713	522	10917	3.34584e+16	Hrs,Mkp,CG13551
GO:0014902	myotube differentiation	0.365327	-1.00696	1	45	3	0.00574713	522	10917	366994358239368	Arf51F,Tpi,rols
GO:0035215	genital disc development	0.365327	-1.00696	1	45	3	0.00574713	522	10917	423563956434127	bnl,btl,Pvr
GO:0045936	negative regulation of phosphate metabolic process	0.365327	-1.00696	1	45	3	0.00574713	522	10917	3.34584e+16	Hrs,Mkp,CG13551
GO:0030703	eggshell formation	0.366075	-1.00492	1	122	7	0.01341	522	10917	3.17884e+34	Cp38,Cp15,Cyp18a1,mael,CG15571,aub,Ppcs
GO:0007304	chorion-containing eggshell formation	0.366075	-1.00492	1	122	7	0.01341	522	10917	3.17884e+34	Cp38,Cp15,Cyp18a1,mael,CG15571,aub,Ppcs
GO:1902532	negative regulation of intracellular signal transduction	0.366547	-1.00363	1	64	4	0.00766284	522	10917	4.37991e+21	Mkp,kappaB-Ras,S6kII,Su(var)2-10
GO:0070887	cellular response to chemical stimulus	0.367317	-1.00153	1	221	12	0.0229885	522	10917	4.23564e+59	bnl,btl,Letm1,Ilp2,CG5189,daw,Ilp3,Ilp6,Hmgcr,Ggamma30A,Pvr,TotA
GO:1902875	regulation of embryonic pattern specification	0.372603	-0.987242	1	27	2	0.00383142	522	10917	4048934524	mael,aub
GO:0007317	regulation of pole plasm oskar mRNA localization	0.372603	-0.987242	1	27	2	0.00383142	522	10917	4048934524	mael,aub
GO:0060281	regulation of oocyte development	0.372603	-0.987242	1	27	2	0.00383142	522	10917	4048934524	mael,aub
GO:0009612	response to mechanical stimulus	0.372603	-0.987242	1	27	2	0.00383142	522	10917	4358244121	Tpi,TotA
GO:0007400	neuroblast fate determination	0.372603	-0.987242	1	27	2	0.00383142	522	10917	3100330983	vnd,l(1)sc
GO:0007530	sex determination	0.372603	-0.987242	1	27	2	0.00383142	522	10917	3661931789	tra2,otu
GO:0009893	positive regulation of metabolic process	0.373357	-0.98522	1	484	25	0.0478927	522	10917	3.09833e+126	l(1)sc,aub,EloA,acj6,Dredd,Hrb98DE,orb,Hel89B,vnd,ash1,Pvr,wor,bnl,btl,Hrs,Mkk4,Sbf,TfIIFalpha,tomb,Antp,Sp7,otu,Hmgcr,AGO3,CG11526
GO:0006915	apoptotic process	0.3744	-0.98243	1	84	5	0.00957854	522	10917	4.28913e+24	Orct,Corp,skl,spin,Dredd
GO:0006164	purine nucleotide biosynthetic process	0.377545	-0.974066	1	65	4	0.00766284	522	10917	4.38734e+19	ras,Prat2,Gyc-89Da,Ppcs
GO:0048468	cell development	0.378273	-0.97214	1	1366	68	0.130268	522	10917	45380,39085,39704,41136,35110,43415,40835,31365,35066,45318,32858,34024,39368,37949,42752,5740325,34894,34947,40133,31003,42596,34636,34906,43428,34193,31168,41225,31227,34581,33470,38999,31239,40489,35762,40016,40527,31011,47080,43873,39817,31309,37619,39564,33458,47220,31789,33903,38884,45248,39203,42295,117353,43497,39707,39644,34524,43385,31788,33474,34127,35051,40699,42770,41020,31350,36076,…	spin,aay,Eig71Ed,RhoL,amos,Doa,Antp,CG15571,Oli,kn,Cyp18a1,santa-maria,rols,Mmp1,orb,CG42732,yuri,beat-Ia,ash1,vnd,how,Rab6,wor,Pkc98E,Glt,moody,Mical,gt,spag4,colt,Cp15,egh,mael,Nup44A,skl,aux,Dredd,acj6,ras,CG4842,dnc,stl,btl,Hrs,Fur1,otu,mmy,exex,Nckx30C,E(z),Ppcs,Cct1,Obp99b,Eig71Ef,Aats-gly,aub,Hrb98DE,Cp38,daw,Pvr,BicD,Xe7,Irk2,Mkk4,lva,Hdc,ds,wrapper
GO:0008039	synaptic target recognition	0.378519	-0.971489	1	46	3	0.00574713	522	10917	341934722047080	Glt,Fur1,acj6
GO:0007043	cell-cell junction assembly	0.378519	-0.971489	1	46	3	0.00574713	522	10917	341343116833062	wol,moody,shakB
GO:0051716	cellular response to stimulus	0.378726	-0.970941	1	1325	66	0.126437	522	10917	31764,40620,45380,39151,41136,31220,33062,35181,35275,43415,40664,34594,42452,33764,34024,32864,42836,37912,39150,41943,41384,45234,34636,43428,40675,31168,31227,37122,36385,33248,39976,36699,32260,40168,42203,35762,44095,38636,35667,37883,40527,31011,34572,32089,53471,32918,31309,33458,39564,31204,37033,42803,35927,33474,34127,42001,42356,40054,41020,14462605,40506,41677,33361,44121,38301,42132	Corp,cno,spin,Ilp3,RhoL,Ilp6,shakB,CG10702,Victoria,Doa,Itp-r83A,Pde1c,Oct-TyrR,TotM,santa-maria,CCKLR-17D3,CG31140,Letm1,Ilp2,Hel89B,CG10898,Ggamma30A,Rab6,Pkc98E,CRMP,moody,gt,CG5189,CG17760,GABA-B-R3,Adgf-A,Arf51F,Fer3HCH,Rab8,PKD,Nup44A,fus,mthl2,kappaB-Ras,CG13575,aux,Dredd,spz4,Sk1,SP555,Hs3st-B,dnc,Hrs,btl,pcx,fab1,Hmgcr,Su(var)2-10,daw,Pvr,Gyc-89Da,bnl,Rad9,Mkk4,Rgk1,Arf79F,f-cup,wry,TotA…
GO:0019438	aromatic compound biosynthetic process	0.378785	-0.970788	1	384	20	0.0383142	522	10917	4.25214e+99	e,CG7368,EloA,kar,ras,CG2246,yellow-d,Gyc-89Da,CG8417,rb,TfIIFalpha,Taf12L,Adgf-A,CG8080,bw,Prat2,se,yellow-k,pug,Ppcs
GO:0006082	organic acid metabolic process	0.379792	-0.968133	1	364	19	0.0363985	522	10917	4.35824e+95	Tpi,Aats-gly,e,CG10131,P5CDh2,aay,Aats-tyr,ATPCL,CG11796,CG9149,Aats-val,Gs1,Hdc,CG1516,se,CG31523,pug,PH4alphaEFB,CG5493
GO:0043436	oxoacid metabolic process	0.379792	-0.968133	1	364	19	0.0363985	522	10917	4.35824e+95	Tpi,Aats-gly,e,CG10131,P5CDh2,aay,Aats-tyr,ATPCL,CG11796,CG9149,Aats-val,Gs1,Hdc,CG1516,se,CG31523,pug,PH4alphaEFB,CG5493
GO:0048812	neuron projection morphogenesis	0.382626	-0.960698	1	527	27	0.0517241	522	10917	3.96445e+136	Aats-gly,acj6,CG42732,aay,daw,beat-Ia,ras,amos,CG4842,Rab6,wor,Xe7,dnc,Pkc98E,Irk2,Glt,Mkk4,Mical,gt,lva,Oli,kn,exex,egh,Nckx30C,E(z),wrapper
GO:0019637	organophosphate metabolic process	0.383277	-0.958997	1	385	20	0.0383142	522	10917	3.22854e+103	IP3K2,alphaTub84B,Cct1,kappaB-Ras,ras,CG2246,Gyc-89Da,CG8417,dnc,Rgk1,Mical,CG2292,Pde1c,CG17760,CG8080,fab1,Hmgcr,CG7789,Prat2,Ppcs
GO:0071310	cellular response to organic substance	0.383597	-0.958164	1	144	8	0.0153257	522	10917	4.23564e+39	bnl,btl,Ilp2,CG5189,daw,Ilp3,Ilp6,Pvr
GO:0009408	response to heat	0.384009	-0.95709	1	85	5	0.00957854	522	10917	4.28524e+24	Hsp68,Victoria,CG7130,TotA,TotM
GO:0006909	phagocytosis	0.384924	-0.954709	1	224	12	0.0229885	522	10917	3.93013e+59	CG7368,gt,Gs1,colt,Slh,Pdh,Syx5,CG10778,ras,tth,svr,pall
GO:0000226	microtubule cytoskeleton organization	0.386511	-0.950596	1	406	21	0.0402299	522	10917	3.75804e+108	RpS16,alphaTub84B,cno,CG6118,cp309,cbs,RpL17,yuri,CG3085,Pvr,Rab6,BicD,skap,RpL12,RpL39,RpL10Ab,RpL7,egh,mael,Skeletor,ds
GO:0007492	endoderm development	0.387478	-0.948097	1	10	1	0.00191571	522	10917	39564	btl
GO:0032387	negative regulation of intracellular transport	0.387478	-0.948097	1	10	1	0.00191571	522	10917	33139	S6kII
GO:0050691	regulation of defense response to virus by host	0.387478	-0.948097	1	10	1	0.00191571	522	10917	31011	Dredd
GO:0006697	ecdysone biosynthetic process	0.387478	-0.948097	1	10	1	0.00191571	522	10917	2768685	mld
GO:0006825	copper ion transport	0.387478	-0.948097	1	10	1	0.00191571	522	10917	31601	Ctr1A
GO:0038202	TORC1 signaling	0.387478	-0.948097	1	10	1	0.00191571	522	10917	34127	Pvr
GO:0042417	dopamine metabolic process	0.387478	-0.948097	1	10	1	0.00191571	522	10917	42521	e
GO:0009648	photoperiodism	0.387478	-0.948097	1	10	1	0.00191571	522	10917	33705	jet
GO:0046426	negative regulation of JAK-STAT cascade	0.387478	-0.948097	1	10	1	0.00191571	522	10917	35927	Su(var)2-10
GO:0016233	telomere capping	0.387478	-0.948097	1	10	1	0.00191571	522	10917	33661	HP6
GO:0018990	ecdysis, chitin-based cuticle	0.387478	-0.948097	1	10	1	0.00191571	522	10917	42803	Hmgcr
GO:0017157	regulation of exocytosis	0.387478	-0.948097	1	10	1	0.00191571	522	10917	35051	BicD
GO:0071711	basement membrane organization	0.387478	-0.948097	1	10	1	0.00191571	522	10917	37949	Mmp1
GO:0001748	optic lobe placode development	0.387478	-0.948097	1	10	1	0.00191571	522	10917	31239	egh
GO:0046154	rhodopsin metabolic process	0.387478	-0.948097	1	10	1	0.00191571	522	10917	34024	santa-maria
GO:0007204	positive regulation of cytosolic calcium ion concentration	0.387478	-0.948097	1	10	1	0.00191571	522	10917	40664	Itp-r83A
GO:0046958	nonassociative learning	0.387478	-0.948097	1	10	1	0.00191571	522	10917	31309	dnc
GO:0042147	retrograde transport, endosome to Golgi	0.387478	-0.948097	1	10	1	0.00191571	522	10917	31144	Vps26
GO:0043407	negative regulation of MAP kinase activity	0.387478	-0.948097	1	10	1	0.00191571	522	10917	4379907	Mkp
GO:0071554	cell wall organization or biogenesis	0.387478	-0.948097	1	10	1	0.00191571	522	10917	38129	LysP
GO:0007318	pole plasm protein localization	0.387478	-0.948097	1	10	1	0.00191571	522	10917	34524	aub
GO:0030708	germarium-derived female germ-line cyst encapsulation	0.387478	-0.948097	1	10	1	0.00191571	522	10917	42295	Ppcs
GO:0016998	cell wall macromolecule catabolic process	0.387478	-0.948097	1	10	1	0.00191571	522	10917	38129	LysP
GO:0042074	cell migration involved in gastrulation	0.387478	-0.948097	1	10	1	0.00191571	522	10917	42596	how
GO:0044036	cell wall macromolecule metabolic process	0.387478	-0.948097	1	10	1	0.00191571	522	10917	38129	LysP
GO:0016330	second mitotic wave involved in compound eye morphogenesis	0.387478	-0.948097	1	10	1	0.00191571	522	10917	40620	cno
GO:0002230	positive regulation of defense response to virus by host	0.387478	-0.948097	1	10	1	0.00191571	522	10917	31011	Dredd
GO:0007415	defasciculation of motor neuron axon	0.387478	-0.948097	1	10	1	0.00191571	522	10917	34947	beat-Ia
GO:1903322	positive regulation of protein modification by small protein conjugation or removal	0.387478	-0.948097	1	10	1	0.00191571	522	10917	33458	Hrs
GO:0006182	cGMP biosynthetic process	0.387478	-0.948097	1	10	1	0.00191571	522	10917	42001	Gyc-89Da
GO:0051785	positive regulation of nuclear division	0.387478	-0.948097	1	10	1	0.00191571	522	10917	45574	ida
GO:0006109	regulation of carbohydrate metabolic process	0.387478	-0.948097	1	10	1	0.00191571	522	10917	39976	Adgf-A
GO:0031398	positive regulation of protein ubiquitination	0.387478	-0.948097	1	10	1	0.00191571	522	10917	33458	Hrs
GO:0035153	epithelial cell type specification, open tracheal system	0.387478	-0.948097	1	10	1	0.00191571	522	10917	39564	btl
GO:0044249	cellular biosynthetic process	0.387936	-0.946916	1	1061	53	0.101533	522	10917	37580,41343,39301,34503,42749,45883,32625,39085,32635,43873,36760,117365,41192,43564,37849,39338,45783,33672,33172,37724,42803,34024,2768685,41279,39678,42295,117353,42521,39644,31957,31613,3355041,39829,43637,37703,42001,31381,45329,40675,39518,40790,36049,40506,34352,39976,53586,34134,36699,35918,38753,326148,38973,36570	RpS16,RpS25,CG7368,Dnz1,EloA,kar,P5CDh2,aay,RpS19a,ras,ATPCL,HBS1,CG8417,RpS28a,RpL39,RpL10Ab,Aats-val,Taf12L,Gs1,bw,Hmgcr,santa-maria,mld,pug,yellow-k,Ppcs,Cct1,e,Aats-gly,alpha-Man-I,RpL17,eIF-4B,Aats-tyr,CG2246,yellow-d,Gyc-89Da,rb,RpL12,CRMP,stv,TfIIFalpha,CG2292,Arf79F,RpL7,Adgf-A,Dhap-at,wol,Arf51F,CG8080,Prat2,CG31523,se,mRpS16
GO:0048024	regulation of mRNA splicing, via spliceosome	0.388525	-0.945398	1	66	4	0.00766284	522	10917	3.66194e+19	tra2,Doa,how,Hrb98DE
GO:0010721	negative regulation of cell development	0.389896	-0.941875	1	28	2	0.00383142	522	10917	3956432918	btl,Hs3st-B
GO:0060438	trachea development	0.389896	-0.941875	1	28	2	0.00383142	522	10917	3956440149	btl,verm
GO:0007157	heterophilic cell-cell adhesion	0.389896	-0.941875	1	28	2	0.00383142	522	10917	4277833245	beat-IV,ds
GO:0022410	circadian sleep/wake cycle process	0.389896	-0.941875	1	28	2	0.00383142	522	10917	276868536589	mld,Ih
GO:0006576	cellular biogenic amine metabolic process	0.389896	-0.941875	1	28	2	0.00383142	522	10917	11735342521	Cct1,e
GO:0044106	cellular amine metabolic process	0.389896	-0.941875	1	28	2	0.00383142	522	10917	11735342521	Cct1,e
GO:0007254	JNK cascade	0.389896	-0.941875	1	28	2	0.00383142	522	10917	4102040620	Mkk4,cno
GO:0009308	amine metabolic process	0.389896	-0.941875	1	28	2	0.00383142	522	10917	11735342521	Cct1,e
GO:0016318	ommatidial rotation	0.389896	-0.941875	1	28	2	0.00383142	522	10917	4062033245	cno,ds
GO:0072507	divalent inorganic cation homeostasis	0.389896	-0.941875	1	28	2	0.00383142	522	10917	3840740664	ZnT63C,Itp-r83A
GO:0007411	axon guidance	0.390171	-0.941169	1	245	13	0.0249042	522	10917	3.41934e+64	Glt,Mical,gt,acj6,Oli,aay,daw,beat-Ia,egh,ras,E(z),Rab6,Xe7
GO:0055002	striated muscle cell development	0.391652	-0.937382	1	47	3	0.00574713	522	10917	393684122542596	rols,Mical,how
GO:0046843	dorsal appendage formation	0.391652	-0.937382	1	47	3	0.00574713	522	10917	404893452442295	mael,aub,Ppcs
GO:0055001	muscle cell development	0.391652	-0.937382	1	47	3	0.00574713	522	10917	393684122542596	rols,Mical,how
GO:0042451	purine nucleoside biosynthetic process	0.391652	-0.937382	1	47	3	0.00574713	522	10917	438733997642295	ras,Adgf-A,Ppcs
GO:0046129	purine ribonucleoside biosynthetic process	0.391652	-0.937382	1	47	3	0.00574713	522	10917	438733997642295	ras,Adgf-A,Ppcs
GO:1901135	carbohydrate derivative metabolic process	0.391883	-0.936793	1	509	26	0.0498084	522	10917	4.01504e+135	serp,alphaTub84B,kappaB-Ras,alpha-Man-I,verm,ras,obst-H,Gyc-89Da,CG8417,Mur89F,Rgk1,Arf79F,CG2292,Pde1c,mmy,PGRP-SB2,CG12009,Adgf-A,CG17760,wol,Arf51F,CG42494,Hmgcr,Prat2,CG32284,Ppcs
GO:0007268	synaptic transmission	0.392638	-0.934867	1	306	16	0.0306513	522	10917	3.27994e+79	Frq2,CG3822,spin,aux,Frq1,Letm1,Clc,BicD,Rab6,rb,dnc,Hrs,Arf79F,Syx5,Arf51F,Sytalpha
GO:0006913	nucleocytoplasmic transport	0.39361	-0.932394	1	86	5	0.00957854	522	10917	3.59264e+25	Phax,RpS28a,Nxf3,Clbn,Nup44A
GO:0051169	nuclear transport	0.39361	-0.932394	1	86	5	0.00957854	522	10917	3.59264e+25	Phax,RpS28a,Nxf3,Clbn,Nup44A
GO:0007435	salivary gland morphogenesis	0.39829	-0.920575	1	146	8	0.0153257	522	10917	3.95644e+39	btl,Obp99b,Eig71Ef,Doa,Mmp1,Eig71Ed,Pvr,santa-maria
GO:0022612	gland morphogenesis	0.39829	-0.920575	1	146	8	0.0153257	522	10917	3.95644e+39	btl,Obp99b,Eig71Ef,Doa,Mmp1,Eig71Ed,Pvr,santa-maria
GO:0030534	adult behavior	0.39829	-0.920575	1	146	8	0.0153257	522	10917	3.11684e+39	moody,Itp-r83A,acj6,aay,Arf51F,shakB,CCKLR-17D3,dnc
GO:0046700	heterocycle catabolic process	0.39829	-0.920575	1	146	8	0.0153257	522	10917	4.08484e+42	alphaTub84B,CRMP,kappaB-Ras,Rgk1,CG17760,P5CDh2,Adgf-A,Gyc-89Da
GO:0007525	somatic muscle development	0.399479	-0.917595	1	67	4	0.00766284	522	10917	4.35824e+19	Tpi,Mical,how,kn
GO:0007030	Golgi organization	0.399479	-0.917595	1	67	4	0.00766284	522	10917	3.41344e+19	wol,Pkc98E,eca,Syx5
GO:0046390	ribose phosphate biosynthetic process	0.399479	-0.917595	1	67	4	0.00766284	522	10917	4.38734e+19	ras,Prat2,Gyc-89Da,Ppcs
GO:0009260	ribonucleotide biosynthetic process	0.399479	-0.917595	1	67	4	0.00766284	522	10917	4.38734e+19	ras,Prat2,Gyc-89Da,Ppcs
GO:0051146	striated muscle cell differentiation	0.4032	-0.908323	1	87	5	0.00957854	522	10917	3.66994e+24	Arf51F,Tpi,rols,Mical,how
GO:0000904	cell morphogenesis involved in differentiation	0.403216	-0.908283	1	471	24	0.045977	522	10917	3.96445e+119	Aats-gly,acj6,aay,daw,beat-Ia,ras,amos,Rab6,wor,Xe7,stl,dnc,Glt,Mical,gt,colt,Oli,kn,exex,egh,E(z),ds,wrapper,Ppcs
GO:0002759	regulation of antimicrobial humoral response	0.404713	-0.904576	1	48	3	0.00574713	522	10917	367694194331011	casp,Hel89B,Dredd
GO:0030097	hemopoiesis	0.404713	-0.904576	1	48	3	0.00574713	522	10917	411363412735927	RhoL,Pvr,Su(var)2-10
GO:0008407	chaeta morphogenesis	0.404713	-0.904576	1	48	3	0.00574713	522	10917	434153271832918	Doa,f,Hs3st-B
GO:0009416	response to light stimulus	0.405628	-0.90232	1	127	7	0.01341	522	10917	3.37054e+34	jet,Victoria,shakB,Ggamma30A,santa-maria,TotA,verm
GO:0006904	vesicle docking involved in exocytosis	0.406974	-0.899007	1	29	2	0.00383142	522	10917	3343434966	Slh,Syx5
GO:0042745	circadian sleep/wake cycle	0.406974	-0.899007	1	29	2	0.00383142	522	10917	276868536589	mld,Ih
GO:0051403	stress-activated MAPK cascade	0.406974	-0.899007	1	29	2	0.00383142	522	10917	4102040620	Mkk4,cno
GO:0045297	post-mating behavior	0.406974	-0.899007	1	29	2	0.00383142	522	10917	3123912798279	egh,Acp98AB
GO:0048278	vesicle docking	0.406974	-0.899007	1	29	2	0.00383142	522	10917	3343434966	Slh,Syx5
GO:1903318	negative regulation of protein maturation	0.406974	-0.899007	1	29	2	0.00383142	522	10917	867405436769	Sfp23F,casp
GO:0022406	membrane docking	0.406974	-0.899007	1	29	2	0.00383142	522	10917	3343434966	Slh,Syx5
GO:0040023	establishment of nucleus localization	0.406974	-0.899007	1	29	2	0.00383142	522	10917	4048935051	mael,BicD
GO:0030865	cortical cytoskeleton organization	0.406974	-0.899007	1	29	2	0.00383142	522	10917	4142731168	Sbf,moody
GO:0031348	negative regulation of defense response	0.406974	-0.899007	1	29	2	0.00383142	522	10917	3676938648	casp,scny
GO:0010955	negative regulation of protein processing	0.406974	-0.899007	1	29	2	0.00383142	522	10917	867405436769	Sfp23F,casp
GO:0048609	multicellular organismal reproductive process	0.410198	-0.891115	1	904	45	0.0862069	522	10917	45380,40527,31011,39085,36619,39151,43873,41136,39324,37619,31309,39564,33458,43415,31365,33672,34594,31789,34966,32858,42803,12798279,42295,32245,117353,39368,34524,39150,42752,43385,34894,31788,40133,34127,42596,35051,34636,34545,34581,36699,31239,38999,40489,32353,35762	spin,aux,Dredd,aay,tra2,Ilp3,ras,RhoL,Gr68a,stl,dnc,btl,Hrs,Doa,CG15571,Taf12L,Pde1c,otu,Syx5,Cyp18a1,Hmgcr,Acp98AB,Ppcs,fne,Cct1,rols,aub,Ilp2,orb,Hrb98DE,yuri,Cp38,ash1,Pvr,how,BicD,Rab6,Gr32a,spag4,Arf51F,egh,Cp15,mael,mamo,Nup44A
GO:0043413	macromolecule glycosylation	0.410398	-0.890627	1	68	4	0.00766284	522	10917	3.41344e+19	wol,Arf51F,Arf79F,alpha-Man-I
GO:0006486	protein glycosylation	0.410398	-0.890627	1	68	4	0.00766284	522	10917	3.41344e+19	wol,Arf51F,Arf79F,alpha-Man-I
GO:0009966	regulation of signal transduction	0.413411	-0.883314	1	617	31	0.059387	522	10917	3.67694e+160	casp,cno,spin,kappaB-Ras,CG18659,CG6182,daw,CG5916,eIF-4B,CG34408,Pvr,dnc,bnl,Irk2,btl,Hrs,CG30456,Mkk4,Sbf,CRMP,S6kII,rad,Oct-TyrR,eca,kn,Spec2,Mkp,Fer3HCH,Hmgcr,CG11526,Su(var)2-10
GO:0034314	Arp2/3 complex-mediated actin nucleation	0.416793	-0.875167	1	11	1	0.00191571	522	10917	32696	Arpc3B
GO:0042246	tissue regeneration	0.416793	-0.875167	1	11	1	0.00191571	522	10917	37949	Mmp1
GO:0051480	cytosolic calcium ion homeostasis	0.416793	-0.875167	1	11	1	0.00191571	522	10917	40664	Itp-r83A
GO:0015718	monocarboxylic acid transport	0.416793	-0.875167	1	11	1	0.00191571	522	10917	33470	colt
GO:0035209	pupal development	0.416793	-0.875167	1	11	1	0.00191571	522	10917	32858	Cyp18a1
GO:0019935	cyclic-nucleotide-mediated signaling	0.416793	-0.875167	1	11	1	0.00191571	522	10917	31309	dnc
GO:0031060	regulation of histone methylation	0.416793	-0.875167	1	11	1	0.00191571	522	10917	34064	LKR
GO:0016201	synaptic target inhibition	0.416793	-0.875167	1	11	1	0.00191571	522	10917	34193	Glt
GO:2001013	epithelial cell proliferation involved in renal tubule morphogenesis	0.416793	-0.875167	1	11	1	0.00191571	522	10917	30983	l(1)sc
GO:0048138	germ-line cyst encapsulation	0.416793	-0.875167	1	11	1	0.00191571	522	10917	42295	Ppcs
GO:0035172	hemocyte proliferation	0.416793	-0.875167	1	11	1	0.00191571	522	10917	34127	Pvr
GO:0042439	ethanolamine-containing compound metabolic process	0.416793	-0.875167	1	11	1	0.00191571	522	10917	117353	Cct1
GO:0030859	polarized epithelial cell differentiation	0.416793	-0.875167	1	11	1	0.00191571	522	10917	33245	ds
GO:0048139	female germ-line cyst encapsulation	0.416793	-0.875167	1	11	1	0.00191571	522	10917	42295	Ppcs
GO:0016126	sterol biosynthetic process	0.416793	-0.875167	1	11	1	0.00191571	522	10917	2768685	mld
GO:0035383	thioester metabolic process	0.416793	-0.875167	1	11	1	0.00191571	522	10917	36760	ATPCL
GO:0006536	glutamate metabolic process	0.416793	-0.875167	1	11	1	0.00191571	522	10917	32625	P5CDh2
GO:0007282	cystoblast division	0.416793	-0.875167	1	11	1	0.00191571	522	10917	34524	aub
GO:0008272	sulfate transport	0.416793	-0.875167	1	11	1	0.00191571	522	10917	43561	CG7912
GO:0007096	regulation of exit from mitosis	0.416793	-0.875167	1	11	1	0.00191571	522	10917	34067	cdc14
GO:0060828	regulation of canonical Wnt signaling pathway	0.416793	-0.875167	1	11	1	0.00191571	522	10917	41177	eca
GO:0046058	cAMP metabolic process	0.416793	-0.875167	1	11	1	0.00191571	522	10917	34594	Pde1c
GO:0006637	acyl-CoA metabolic process	0.416793	-0.875167	1	11	1	0.00191571	522	10917	36760	ATPCL
GO:0007032	endosome organization	0.416793	-0.875167	1	11	1	0.00191571	522	10917	32918	Hs3st-B
GO:0050673	epithelial cell proliferation	0.416793	-0.875167	1	11	1	0.00191571	522	10917	30983	l(1)sc
GO:0061331	epithelial cell proliferation involved in Malpighian tubule morphogenesis	0.416793	-0.875167	1	11	1	0.00191571	522	10917	30983	l(1)sc
GO:0006964	positive regulation of biosynthetic process of antibacterial peptides active against Gram-negative bacteria	0.416793	-0.875167	1	11	1	0.00191571	522	10917	31011	Dredd
GO:0007020	microtubule nucleation	0.416793	-0.875167	1	11	1	0.00191571	522	10917	3772382	cp309
GO:0045198	establishment of epithelial cell apical/basal polarity	0.416793	-0.875167	1	11	1	0.00191571	522	10917	33245	ds
GO:0043090	amino acid import	0.416793	-0.875167	1	11	1	0.00191571	522	10917	36331	CG8850
GO:0090100	positive regulation of transmembrane receptor protein serine/threonine kinase signaling pathway	0.416793	-0.875167	1	11	1	0.00191571	522	10917	33474	daw
GO:0045665	negative regulation of neuron differentiation	0.416793	-0.875167	1	11	1	0.00191571	522	10917	33139	S6kII
GO:0071901	negative regulation of protein serine/threonine kinase activity	0.416793	-0.875167	1	11	1	0.00191571	522	10917	4379907	Mkp
GO:0030317	sperm motility	0.416793	-0.875167	1	11	1	0.00191571	522	10917	34581	spag4
GO:0006497	protein lipidation	0.417692	-0.87301	1	49	3	0.00574713	522	10917	395183604934503	stv,CG2292,Dnz1
GO:0045454	cell redox homeostasis	0.417692	-0.87301	1	49	3	0.00574713	522	10917	325883724938301	CG9911,CG11007,CG8993
GO:0042158	lipoprotein biosynthetic process	0.417692	-0.87301	1	49	3	0.00574713	522	10917	395183604934503	stv,CG2292,Dnz1
GO:0034329	cell junction assembly	0.417692	-0.87301	1	49	3	0.00574713	522	10917	341343116833062	wol,moody,shakB
GO:0007602	phototransduction	0.417692	-0.87301	1	49	3	0.00574713	522	10917	452343306234024	Ggamma30A,shakB,santa-maria
GO:0002920	regulation of humoral immune response	0.417692	-0.87301	1	49	3	0.00574713	522	10917	367694194331011	casp,Hel89B,Dredd
GO:0045595	regulation of cell differentiation	0.420027	-0.867436	1	291	15	0.0287356	522	10917	3.95644e+74	btl,sals,spin,scny,Arf79F,S6kII,aub,lva,Hrb98DE,kn,Hs3st-B,how,Pvr,sinah,mael
GO:0002807	positive regulation of antimicrobial peptide biosynthetic process	0.423816	-0.858456	1	30	2	0.00383142	522	10917	4194331011	Hel89B,Dredd
GO:0090150	establishment of protein localization to membrane	0.423816	-0.858456	1	30	2	0.00383142	522	10917	3902843034	Srp68,CG10420
GO:0007294	germarium-derived oocyte fate determination	0.423816	-0.858456	1	30	2	0.00383142	522	10917	3505142752	BicD,orb
GO:0030833	regulation of actin filament polymerization	0.423816	-0.858456	1	30	2	0.00383142	522	10917	3269641377	Arpc3B,sals
GO:0034250	positive regulation of cellular amide metabolic process	0.423816	-0.858456	1	30	2	0.00383142	522	10917	4194331011	Hel89B,Dredd
GO:0019991	septate junction assembly	0.423816	-0.858456	1	30	2	0.00383142	522	10917	3413431168	wol,moody
GO:0032313	regulation of Rab GTPase activity	0.423816	-0.858456	1	30	2	0.00383142	522	10917	4196042869	CG5916,CG6182
GO:0046474	glycerophospholipid biosynthetic process	0.423816	-0.858456	1	30	2	0.00383142	522	10917	11735336049	Cct1,CG2292
GO:0048522	positive regulation of cellular process	0.425263	-0.855048	1	847	42	0.0804598	522	10917	3.86484e+213	scny,EloA,acj6,Dredd,Arpc3B,RhoL,btl,Hrs,CG30456,sals,Antp,otu,Oct-TyrR,kn,Hmgcr,p24-1,CG11526,l(1)sc,aub,Ilp2,orb,Hrb98DE,daw,Hel89B,eIF-4B,ash1,vnd,Pvr,BicD,wor,bnl,Mkk4,Sbf,CRMP,TfIIFalpha,tomb,Sp7,lva,eca,ida,Fer3HCH,AGO3
GO:0006412	translation	0.42529	-0.854984	1	292	15	0.0287356	522	10917	4.53294e+77	RpL12,RpS16,RpS28a,RpS25,RpL39,RpL10Ab,Aats-gly,Aats-val,RpL7,RpL17,RpS19a,eIF-4B,Aats-tyr,mRpS16,HBS1
GO:0010631	epithelial cell migration	0.427677	-0.849386	1	150	8	0.0153257	522	10917	4.23564e+39	bnl,btl,Hrs,egh,RhoL,rols,Pvr,Ppcs
GO:0090132	epithelium migration	0.427677	-0.849386	1	150	8	0.0153257	522	10917	4.23564e+39	bnl,btl,Hrs,egh,RhoL,rols,Pvr,Ppcs
GO:0009953	dorsal/ventral pattern formation	0.427677	-0.849386	1	150	8	0.0153257	522	10917	4.34284e+39	Pkc98E,eca,orb,Slh,vnd,Hs3st-B,mael,BicD
GO:0007291	sperm individualization	0.430577	-0.842629	1	50	3	0.00574713	522	10917	348944052731011	yuri,aux,Dredd
GO:0002697	regulation of immune effector process	0.430577	-0.842629	1	50	3	0.00574713	522	10917	367694194331011	casp,Hel89B,Dredd
GO:0002121	inter-male aggressive behavior	0.430577	-0.842629	1	50	3	0.00574713	522	10917	392714117737755	CG6175,eca,Sesn
GO:0048568	embryonic organ development	0.430577	-0.842629	1	50	3	0.00574713	522	10917	411364280334127	RhoL,Hmgcr,Pvr
GO:0098662	inorganic cation transmembrane transport	0.431842	-0.839696	1	90	5	0.00957854	522	10917	3.84074e+26	ZnT63C,Itp-r83A,Ctr1A,CG10864,CG42594
GO:0098655	cation transmembrane transport	0.431842	-0.839696	1	90	5	0.00957854	522	10917	3.84074e+26	ZnT63C,Itp-r83A,Ctr1A,CG10864,CG42594
GO:0043484	regulation of RNA splicing	0.432106	-0.839083	1	70	4	0.00766284	522	10917	3.66194e+19	tra2,Doa,how,Hrb98DE
GO:0070085	glycosylation	0.432106	-0.839083	1	70	4	0.00766284	522	10917	3.41344e+19	wol,Arf51F,Arf79F,alpha-Man-I
GO:0097485	neuron projection guidance	0.435476	-0.831317	1	253	13	0.0249042	522	10917	3.41934e+64	Glt,Mical,gt,acj6,Oli,aay,daw,beat-Ia,egh,ras,E(z),Rab6,Xe7
GO:0034220	ion transmembrane transport	0.437218	-0.827324	1	131	7	0.01341	522	10917	3.84074e+36	ZnT63C,CG13248,CG8850,Itp-r83A,Ctr1A,CG10864,CG42594
GO:0031023	microtubule organizing center organization	0.437218	-0.827324	1	131	7	0.01341	522	10917	3.48944e+36	yuri,RpL10Ab,mael,cp309,cbs,RpL7,RpL17
GO:0006811	ion transport	0.437634	-0.826372	1	397	20	0.0383142	522	10917	4.24734e+103	CG3822,Letm1,CG42732,ZnT63C,CG8850,Nha1,Ant2,CG10864,KCNQ,Irk2,CG13248,Itp-r83A,colt,Orct,CG7912,Fer3HCH,Nckx30C,Ctr1A,Ih,CG42594
GO:0030707	ovarian follicle cell development	0.438428	-0.824559	1	274	14	0.0268199	522	10917	3.34584e+69	Hrs,btl,rols,aub,CG15571,Cp38,Cp15,egh,RhoL,Cyp18a1,mael,Pvr,stl,Ppcs
GO:0071482	cellular response to light stimulus	0.440407	-0.820056	1	31	2	0.00383142	522	10917	3527544121	Victoria,TotA
GO:0021782	glial cell development	0.440407	-0.820056	1	31	2	0.00383142	522	10917	3100331168	vnd,moody
GO:0030716	oocyte fate determination	0.440407	-0.820056	1	31	2	0.00383142	522	10917	3505142752	BicD,orb
GO:0048867	stem cell fate determination	0.440407	-0.820056	1	31	2	0.00383142	522	10917	3100330983	vnd,l(1)sc
GO:0071840	cellular component organization or biogenesis	0.440915	-0.818904	1	2347	114	0.218391	522	10917	37580,40620,45380,38648,33661,39085,32696,37663,41303,35110,37808,33062,43564,34064,41377,43415,40664,33672,31365,35066,34966,45318,32028,32799,39368,33230,36492,3772382,37912,39150,37949,40221,42752,5740325,34894,34947,40133,42596,34636,31381,34906,41067,45329,43428,41427,34193,31168,41225,31227,34678,33470,34352,34134,36699,31239,38999,39028,40489,38193,40527,47080,36619,43873,32918,32130,39817…	RpS16,cno,spin,scny,HP6,aay,Arpc3B,CG3085,CG4565,amos,fzr2,shakB,RpS28a,LKR,sals,Doa,Itp-r83A,Taf12L,CG15571,Oli,Syx5,kn,Myo10A,Frq2,rols,rempA,cbs,cp309,Letm1,Ilp2,Mmp1,Clc,orb,CG42732,yuri,beat-Ia,ash1,how,Rab6,rb,wor,skap,RpL12,Pkc98E,Sbf,Glt,moody,Mical,gt,CG5781,colt,RpL7,wol,Arf51F,egh,Cp15,Srp68,mael,ABCB7,aux,acj6,tra2,ras,Hs3st-B,dy,CG4842,HBS1,dnc,stl,btl,Hrs,RpL39,RpL10Ab,pcx,mmy,otu,G…
GO:0006140	regulation of nucleotide metabolic process	0.441329	-0.817964	1	91	5	0.00957854	522	10917	4.19605e+24	CG5916,CG13551,rad,Oct-TyrR,CG6182
GO:0046394	carboxylic acid biosynthetic process	0.441329	-0.817964	1	91	5	0.00957854	522	10917	3.26148e+25	CG31523,pug,Gs1,P5CDh2,aay
GO:0016053	organic acid biosynthetic process	0.441329	-0.817964	1	91	5	0.00957854	522	10917	3.26148e+25	CG31523,pug,Gs1,P5CDh2,aay
GO:0015672	monovalent inorganic cation transport	0.442331	-0.815696	1	152	8	0.0153257	522	10917	3.60714e+43	KCNQ,Irk2,CG42732,Nckx30C,Nha1,CG10864,Ih,CG42594
GO:0006650	glycerophospholipid metabolic process	0.442881	-0.814455	1	71	4	0.00766284	522	10917	1.17353e+20	Cct1,fab1,CG7789,CG2292
GO:0050954	sensory perception of mechanical stimulus	0.442881	-0.814455	1	71	4	0.00766284	522	10917	3.77243e+21	bw,rempA,cp309,f
GO:0042752	regulation of circadian rhythm	0.443358	-0.813378	1	51	3	0.00574713	522	10917	3.37053e+16	jet,mld,Ih
GO:0002066	columnar/cuboidal epithelial cell development	0.443882	-0.812198	1	275	14	0.0268199	522	10917	3.34584e+69	Hrs,btl,rols,aub,CG15571,Cp38,Cp15,egh,RhoL,Cyp18a1,mael,Pvr,stl,Ppcs
GO:0000132	establishment of mitotic spindle orientation	0.444707	-0.81034	1	12	1	0.00191571	522	10917	40620	cno
GO:0003014	renal system process	0.444707	-0.81034	1	12	1	0.00191571	522	10917	33961	Nha1
GO:0008154	actin polymerization or depolymerization	0.444707	-0.81034	1	12	1	0.00191571	522	10917	41225	Mical
GO:0043101	purine-containing compound salvage	0.444707	-0.81034	1	12	1	0.00191571	522	10917	39976	Adgf-A
GO:0032456	endocytic recycling	0.444707	-0.81034	1	12	1	0.00191571	522	10917	41427	Sbf
GO:0008299	isoprenoid biosynthetic process	0.444707	-0.81034	1	12	1	0.00191571	522	10917	42803	Hmgcr
GO:0008205	ecdysone metabolic process	0.444707	-0.81034	1	12	1	0.00191571	522	10917	2768685	mld
GO:0035002	liquid clearance, open tracheal system	0.444707	-0.81034	1	12	1	0.00191571	522	10917	33470	colt
GO:0051224	negative regulation of protein transport	0.444707	-0.81034	1	12	1	0.00191571	522	10917	33139	S6kII
GO:0007394	dorsal closure, elongation of leading edge cells	0.444707	-0.81034	1	12	1	0.00191571	522	10917	40620	cno
GO:0032103	positive regulation of response to external stimulus	0.444707	-0.81034	1	12	1	0.00191571	522	10917	42788	CG10157
GO:0001932	regulation of protein phosphorylation	0.45078	-0.796777	1	92	5	0.00957854	522	10917	4.23564e+26	bnl,btl,Hrs,Mkk4,Mkp
GO:0002065	columnar/cuboidal epithelial cell differentiation	0.454779	-0.787944	1	277	14	0.0268199	522	10917	3.34584e+69	Hrs,btl,rols,aub,CG15571,Cp38,Cp15,egh,RhoL,Cyp18a1,mael,Pvr,stl,Ppcs
GO:0008104	protein localization	0.455793	-0.785717	1	463	23	0.0440613	522	10917	3.73374e+114	CG11110,cbs,aub,Clc,Slh,Rab6,rb,Clbn,Hrs,Doa,Vps26,Syx5,KdelR,Arf51F,KrT95D,Srp68,Myo10A,Rab8,mael,CG9175,CG10420,Nup44A,CG10144
GO:0042157	lipoprotein metabolic process	0.456025	-0.785208	1	52	3	0.00574713	522	10917	395183604934503	stv,CG2292,Dnz1
GO:0001558	regulation of cell growth	0.456025	-0.785208	1	52	3	0.00574713	522	10917	395643915037755	btl,Ilp2,Sesn
GO:0007298	border follicle cell migration	0.456431	-0.784318	1	113	6	0.0114943	522	10917	3.34583e+29	Hrs,egh,btl,RhoL,rols,Pvr
GO:0014017	neuroblast fate commitment	0.456732	-0.783658	1	32	2	0.00383142	522	10917	3100330983	vnd,l(1)sc
GO:0031098	stress-activated protein kinase signaling cascade	0.456732	-0.783658	1	32	2	0.00383142	522	10917	4102040620	Mkk4,cno
GO:1902099	regulation of metaphase/anaphase transition of cell cycle	0.456732	-0.783658	1	32	2	0.00383142	522	10917	4557440848	ida,alphaTub84B
GO:0030071	regulation of mitotic metaphase/anaphase transition	0.456732	-0.783658	1	32	2	0.00383142	522	10917	4557440848	ida,alphaTub84B
GO:0051258	protein polymerization	0.456732	-0.783658	1	32	2	0.00383142	522	10917	408483772382	alphaTub84B,cp309
GO:0048870	cell motility	0.458122	-0.780619	1	257	13	0.0249042	522	10917	4.23564e+66	bnl,btl,Hrs,spin,rols,cp309,spag4,egh,RhoL,Hmgcr,Pvr,how,Ppcs
GO:0009948	anterior/posterior axis specification	0.460752	-0.774895	1	134	7	0.01341	522	10917	3.12274e+34	gt,mael,aub,Antp,BicD,Rab6,orb
GO:0002064	epithelial cell development	0.462114	-0.771943	1	299	15	0.0287356	522	10917	3.34584e+74	Hrs,btl,rols,aub,CG15571,colt,Cp38,Cp15,egh,RhoL,Cyp18a1,mael,Pvr,stl,Ppcs
GO:0010604	positive regulation of macromolecule metabolic process	0.463547	-0.768847	1	382	19	0.0363985	522	10917	3.09833e+96	l(1)sc,aub,EloA,acj6,Hrb98DE,orb,vnd,ash1,wor,bnl,Hrs,btl,Mkk4,Sbf,TfIIFalpha,tomb,Antp,otu,AGO3
GO:0045859	regulation of protein kinase activity	0.464237	-0.76736	1	73	4	0.00766284	522	10917	4.23564e+21	bnl,btl,Mkk4,Mkp
GO:0019953	sexual reproduction	0.465352	-0.76496	1	922	45	0.0862069	522	10917	45380,40527,31011,39085,36619,39151,43873,41136,39324,37619,31309,39564,33458,43415,31365,33672,34594,31789,34966,32858,42803,12798279,42295,32245,117353,39368,34524,39150,42752,43385,34894,31788,40133,34127,42596,35051,34636,34545,34581,36699,31239,38999,40489,32353,35762	spin,aux,Dredd,aay,tra2,Ilp3,ras,RhoL,Gr68a,stl,dnc,btl,Hrs,Doa,CG15571,Taf12L,Pde1c,otu,Syx5,Cyp18a1,Hmgcr,Acp98AB,Ppcs,fne,Cct1,rols,aub,Ilp2,orb,Hrb98DE,yuri,Cp38,ash1,Pvr,how,BicD,Rab6,Gr32a,spag4,Arf51F,egh,Cp15,mael,mamo,Nup44A
GO:0048666	neuron development	0.465543	-0.764551	1	652	32	0.0613027	522	10917	4.70803e+161	acj6,Dredd,aay,ras,amos,CG4842,dnc,Fur1,Doa,mmy,Oli,kn,exex,Nckx30C,E(z),Aats-gly,CG42732,daw,beat-Ia,Rab6,wor,Xe7,Pkc98E,Irk2,Glt,Mkk4,Mical,gt,lva,Hdc,egh,wrapper
GO:0042455	ribonucleoside biosynthetic process	0.468569	-0.758071	1	53	3	0.00574713	522	10917	438733997642295	ras,Adgf-A,Ppcs
GO:1901659	glycosyl compound biosynthetic process	0.468569	-0.758071	1	53	3	0.00574713	522	10917	438733997642295	ras,Adgf-A,Ppcs
GO:0009163	nucleoside biosynthetic process	0.468569	-0.758071	1	53	3	0.00574713	522	10917	438733997642295	ras,Adgf-A,Ppcs
GO:0002118	aggressive behavior	0.468569	-0.758071	1	53	3	0.00574713	522	10917	392714117737755	CG6175,eca,Sesn
GO:0032268	regulation of cellular protein metabolic process	0.469412	-0.756273	1	259	13	0.0249042	522	10917	4.23563e+68	bnl,LKR,btl,Hrs,Sfp23F,casp,Mkk4,aub,Hrb98DE,orb,bru-3,Mkp,rb
GO:0009150	purine ribonucleotide metabolic process	0.469488	-0.756112	1	197	10	0.0191571	522	10917	4.08481e+52	alphaTub84B,Rgk1,kappaB-Ras,Pde1c,CG17760,ras,Hmgcr,Prat2,Gyc-89Da,Ppcs
GO:0007422	peripheral nervous system development	0.469549	-0.755983	1	94	5	0.00957854	522	10917	3.12395e+24	egh,spin,l(1)sc,Dredd,aay
GO:0098660	inorganic ion transmembrane transport	0.469549	-0.755983	1	94	5	0.00957854	522	10917	3.84074e+26	ZnT63C,Itp-r83A,Ctr1A,CG10864,CG42594
GO:0097305	response to alcohol	0.469549	-0.755983	1	94	5	0.00957854	522	10917	4.34284e+24	Pkc98E,Arf51F,moody,dnc,aay
GO:0071173	spindle assembly checkpoint	0.471288	-0.752287	1	13	1	0.00191571	522	10917	40848	alphaTub84B
GO:0042220	response to cocaine	0.471288	-0.752287	1	13	1	0.00191571	522	10917	31168	moody
GO:0035089	establishment of apical/basal cell polarity	0.471288	-0.752287	1	13	1	0.00191571	522	10917	33245	ds
GO:0051445	regulation of meiotic cell cycle	0.471288	-0.752287	1	13	1	0.00191571	522	10917	35762	Nup44A
GO:0018991	oviposition	0.471288	-0.752287	1	13	1	0.00191571	522	10917	40133	ash1
GO:0031345	negative regulation of cell projection organization	0.471288	-0.752287	1	13	1	0.00191571	522	10917	39564	btl
GO:0045930	negative regulation of mitotic cell cycle	0.471288	-0.752287	1	13	1	0.00191571	522	10917	34966	Syx5
GO:0070588	calcium ion transmembrane transport	0.471288	-0.752287	1	13	1	0.00191571	522	10917	40664	Itp-r83A
GO:0007094	mitotic spindle assembly checkpoint	0.471288	-0.752287	1	13	1	0.00191571	522	10917	40848	alphaTub84B
GO:0072525	pyridine-containing compound biosynthetic process	0.471288	-0.752287	1	13	1	0.00191571	522	10917	35918	CG8080
GO:0006493	protein O-linked glycosylation	0.471288	-0.752287	1	13	1	0.00191571	522	10917	34134	wol
GO:0061057	peptidoglycan recognition protein signaling pathway	0.471288	-0.752287	1	13	1	0.00191571	522	10917	31011	Dredd
GO:0060359	response to ammonium ion	0.471288	-0.752287	1	13	1	0.00191571	522	10917	31168	moody
GO:0008630	intrinsic apoptotic signaling pathway in response to DNA damage	0.471288	-0.752287	1	13	1	0.00191571	522	10917	31764	Corp
GO:0031163	metallo-sulfur cluster assembly	0.471288	-0.752287	1	13	1	0.00191571	522	10917	38193	ABCB7
GO:0006081	cellular aldehyde metabolic process	0.471288	-0.752287	1	13	1	0.00191571	522	10917	39812	Pdh
GO:0008057	eye pigment granule organization	0.471288	-0.752287	1	13	1	0.00191571	522	10917	31381	rb
GO:0016226	iron-sulfur cluster assembly	0.471288	-0.752287	1	13	1	0.00191571	522	10917	38193	ABCB7
GO:0007184	SMAD protein import into nucleus	0.471288	-0.752287	1	13	1	0.00191571	522	10917	35762	Nup44A
GO:0032271	regulation of protein polymerization	0.472779	-0.749127	1	33	2	0.00383142	522	10917	3269641377	Arpc3B,sals
GO:0016236	macroautophagy	0.472779	-0.749127	1	33	2	0.00383142	522	10917	3703342132	fab1,Atg8b
GO:0045017	glycerolipid biosynthetic process	0.472779	-0.749127	1	33	2	0.00383142	522	10917	11735336049	Cct1,CG2292
GO:0030198	extracellular matrix organization	0.472779	-0.749127	1	33	2	0.00383142	522	10917	3390337949	mmy,Mmp1
GO:0051028	mRNA transport	0.472779	-0.749127	1	33	2	0.00383142	522	10917	31787835051	Nxf3,BicD
GO:0032482	Rab protein signal transduction	0.472779	-0.749127	1	33	2	0.00383142	522	10917	4016834636	Rab8,Rab6
GO:0030706	germarium-derived oocyte differentiation	0.472779	-0.749127	1	33	2	0.00383142	522	10917	3505142752	BicD,orb
GO:1902275	regulation of chromatin organization	0.472779	-0.749127	1	33	2	0.00383142	522	10917	3406432353	LKR,mamo
GO:0030100	regulation of endocytosis	0.472779	-0.749127	1	33	2	0.00383142	522	10917	4050635051	Arf79F,BicD
GO:0050804	regulation of synaptic transmission	0.474807	-0.744846	1	74	4	0.00766284	522	10917	3.27994e+19	Frq2,CG3822,BicD,Frq1
GO:0043549	regulation of kinase activity	0.474807	-0.744846	1	74	4	0.00766284	522	10917	4.23564e+21	bnl,btl,Mkk4,Mkp
GO:0008610	lipid biosynthetic process	0.476324	-0.741657	1	136	7	0.01341	522	10917	1.17353e+38	Cct1,Cyp18a1,Hmgcr,CG2292,CG31523,mld,Dhap-at
GO:0065007	biological regulation	0.477742	-0.738684	1	3325	160	0.306513	522	10917	36769,45380,38648,33661,41136,35110,33062,40956,35181,34064,41377,43415,40835,40664,34594,34966,45318,43495,32858,38412,42836,32799,37912,39150,39611,41943,31003,39885,45234,34636,43428,40675,40790,47894,31227,36385,39976,34427,39812,36699,31239,4379907,32260,40489,31601,42203,31807,3355150,35762,38636,40150,35667,37883,34485,40527,47080,42869,31011,40149,32089,117365,31309,39564,33458,8674054,31…	casp,spin,scny,HP6,RhoL,amos,shakB,CG7910,CG10702,LKR,sals,Doa,Antp,Itp-r83A,Pde1c,Syx5,kn,dmrt99B,Cyp18a1,CG11526,CG31140,Frq2,Letm1,Ilp2,bmm,Hel89B,vnd,sinah,Ggamma30A,Rab6,Pkc98E,CRMP,TfIIFalpha,hbn,gt,CG17760,Adgf-A,KdelR,Pdh,Arf51F,egh,Mkp,Fer3HCH,mael,Ctr1A,PKD,CG11294,AGO3,Nup44A,mthl2,serp,kappaB-Ras,CG13575,CG17124,aux,acj6,CG6182,Dredd,verm,Sk1,HBS1,dnc,btl,Hrs,Sfp23F,pcx,otu,Spec2,bru-…
GO:0050829	defense response to Gram-negative bacterium	0.478859	-0.736349	1	95	5	0.00957854	522	10917	3.92733e+25	CG6168,aub,HBS1,Dredd,Su(var)2-10
GO:0007140	male meiosis	0.480983	-0.731924	1	54	3	0.00574713	522	10917	337793780833672	tomb,fzr2,Taf12L
GO:0043254	regulation of protein complex assembly	0.480983	-0.731924	1	54	3	0.00574713	522	10917	326964137740790	Arpc3B,sals,TfIIFalpha
GO:0044703	multi-organism reproductive process	0.48379	-0.726105	1	928	45	0.0862069	522	10917	45380,40527,31011,39085,36619,39151,43873,41136,39324,37619,31309,39564,33458,43415,31365,33672,34594,31789,34966,32858,42803,12798279,42295,32245,117353,39368,34524,39150,42752,43385,34894,31788,40133,34127,42596,35051,34636,34545,34581,36699,31239,38999,40489,32353,35762	spin,aux,Dredd,aay,tra2,Ilp3,ras,RhoL,Gr68a,stl,dnc,btl,Hrs,Doa,CG15571,Taf12L,Pde1c,otu,Syx5,Cyp18a1,Hmgcr,Acp98AB,Ppcs,fne,Cct1,rols,aub,Ilp2,orb,Hrb98DE,yuri,Cp38,ash1,Pvr,how,BicD,Rab6,Gr32a,spag4,Arf51F,egh,Cp15,mael,mamo,Nup44A
GO:0072521	purine-containing compound metabolic process	0.483829	-0.726024	1	220	11	0.0210728	522	10917	4.08484e+57	alphaTub84B,kappaB-Ras,Rgk1,Pde1c,CG17760,Adgf-A,ras,Hmgcr,Prat2,Gyc-89Da,Ppcs
GO:0031400	negative regulation of protein modification process	0.488537	-0.716341	1	34	2	0.00383142	522	10917	334584379907	Hrs,Mkp
GO:0007427	epithelial cell migration, open tracheal system	0.488537	-0.716341	1	34	2	0.00383142	522	10917	4235639564	bnl,btl
GO:0009127	purine nucleoside monophosphate biosynthetic process	0.488537	-0.716341	1	34	2	0.00383142	522	10917	4387338753	ras,Prat2
GO:0009168	purine ribonucleoside monophosphate biosynthetic process	0.488537	-0.716341	1	34	2	0.00383142	522	10917	4387338753	ras,Prat2
GO:0045451	pole plasm oskar mRNA localization	0.488537	-0.716341	1	34	2	0.00383142	522	10917	3463642752	Rab6,orb
GO:0060284	regulation of cell development	0.488775	-0.715854	1	200	10	0.0191571	522	10917	3.95644e+49	btl,sals,spin,scny,S6kII,aub,lva,sinah,mael,Hs3st-B
GO:0033036	macromolecule localization	0.489216	-0.714952	1	596	29	0.0555556	522	10917	3.73374e+145	CG11110,cbs,aub,Clc,orb,Slh,Phax,BicD,Rab6,rb,Clbn,RpS28a,Hrs,Doa,Vps26,KdelR,Syx5,Arf51F,Nxf3,KrT95D,egh,Myo10A,Srp68,Rab8,mael,CG9175,CG10420,Nup44A,CG10144
GO:0007308	oocyte construction	0.49017	-0.713003	1	117	6	0.0114943	522	10917	3.12394e+29	egh,mael,aub,BicD,Rab6,orb
GO:0033365	protein localization to organelle	0.491777	-0.709729	1	138	7	0.01341	522	10917	4.28434e+34	KrT95D,CG11110,Srp68,cbs,CG10420,Nup44A,KdelR
GO:0009583	detection of light stimulus	0.493258	-0.706723	1	55	3	0.00574713	522	10917	330624523434024	shakB,Ggamma30A,santa-maria
GO:0048699	generation of neurons	0.494629	-0.703948	1	848	41	0.0785441	522	10917	4.70803e+206	acj6,Dredd,aay,ras,amos,Hs3st-B,CG4842,dnc,btl,Fur1,Doa,Antp,mmy,Oli,kn,exex,Nckx30C,f,E(z),l(1)sc,Aats-gly,CG42732,daw,beat-Ia,vnd,sinah,Rab6,Xe7,wor,Pkc98E,Irk2,Glt,Mkk4,Mical,gt,S6kII,lva,Hdc,egh,ds,wrapper
GO:0030855	epithelial cell differentiation	0.494862	-0.703477	1	347	17	0.032567	522	10917	3.93683e+84	rols,aub,Cp38,RhoL,Pvr,stl,btl,Hrs,CG15571,colt,egh,Cp15,Cyp18a1,f,ds,mael,Ppcs
GO:0006163	purine nucleotide metabolic process	0.495168	-0.702858	1	201	10	0.0191571	522	10917	4.08481e+52	alphaTub84B,Rgk1,kappaB-Ras,Pde1c,CG17760,ras,Hmgcr,Prat2,Gyc-89Da,Ppcs
GO:0048646	anatomical structure formation involved in morphogenesis	0.495401	-0.702387	1	535	26	0.0498084	522	10917	4.35824e+129	Tpi,rols,rempA,aub,aux,orb,Dredd,yuri,Cp38,amos,how,Rab6,BicD,bnl,Mical,CG15571,lva,mmy,Arf51F,egh,Cp15,Cyp18a1,ds,mael,Ppcs,CG3259
GO:0006629	lipid metabolic process	0.495479	-0.702231	1	368	18	0.0344828	522	10917	1.17353e+93	Cct1,CG17646,CG10131,CG7840,bmm,Sk1,CG9149,CG2292,Dhap-at,Pdh,Cyp18a1,fab1,Hmgcr,CG7789,CG9518,CG31523,mld,santa-maria
GO:0019730	antimicrobial humoral response	0.495703	-0.701778	1	76	4	0.00766284	522	10917	4.08484e+19	alphaTub84B,Hel89B,LysP,Pvr
GO:0008344	adult locomotory behavior	0.495703	-0.701778	1	76	4	0.00766284	522	10917	4.06643e+19	Itp-r83A,shakB,acj6,CCKLR-17D3
GO:0048864	stem cell development	0.495703	-0.701778	1	76	4	0.00766284	522	10917	3.10034e+19	vnd,how,Antp,Hrb98DE
GO:0048805	imaginal disc-derived genitalia morphogenesis	0.496598	-0.699974	1	14	1	0.00191571	522	10917	34127	Pvr
GO:0035126	post-embryonic genitalia morphogenesis	0.496598	-0.699974	1	14	1	0.00191571	522	10917	34127	Pvr
GO:0006446	regulation of translational initiation	0.496598	-0.699974	1	14	1	0.00191571	522	10917	34524	aub
GO:0031929	TOR signaling	0.496598	-0.699974	1	14	1	0.00191571	522	10917	34127	Pvr
GO:0031577	spindle checkpoint	0.496598	-0.699974	1	14	1	0.00191571	522	10917	40848	alphaTub84B
GO:0044331	cell-cell adhesion mediated by cadherin	0.496598	-0.699974	1	14	1	0.00191571	522	10917	33245	ds
GO:0045761	regulation of adenylate cyclase activity	0.496598	-0.699974	1	14	1	0.00191571	522	10917	42452	Oct-TyrR
GO:0048800	antennal morphogenesis	0.496598	-0.699974	1	14	1	0.00191571	522	10917	32718	f
GO:0031937	positive regulation of chromatin silencing	0.496598	-0.699974	1	14	1	0.00191571	522	10917	38648	scny
GO:0051642	centrosome localization	0.496598	-0.699974	1	14	1	0.00191571	522	10917	40675	CRMP
GO:0008585	female gonad development	0.496598	-0.699974	1	14	1	0.00191571	522	10917	37619	stl
GO:0090162	establishment of epithelial cell polarity	0.496598	-0.699974	1	14	1	0.00191571	522	10917	33245	ds
GO:0048753	pigment granule organization	0.496598	-0.699974	1	14	1	0.00191571	522	10917	31381	rb
GO:0006936	muscle contraction	0.496598	-0.699974	1	14	1	0.00191571	522	10917	36071	KCNQ
GO:0045010	actin nucleation	0.496598	-0.699974	1	14	1	0.00191571	522	10917	32696	Arpc3B
GO:0048803	imaginal disc-derived male genitalia morphogenesis	0.496598	-0.699974	1	14	1	0.00191571	522	10917	34127	Pvr
GO:0071174	mitotic spindle checkpoint	0.496598	-0.699974	1	14	1	0.00191571	522	10917	40848	alphaTub84B
GO:0030817	regulation of cAMP biosynthetic process	0.496598	-0.699974	1	14	1	0.00191571	522	10917	42452	Oct-TyrR
GO:0033059	cellular pigmentation	0.496598	-0.699974	1	14	1	0.00191571	522	10917	31381	rb
GO:0007220	Notch receptor processing	0.496598	-0.699974	1	14	1	0.00191571	522	10917	31381	rb
GO:0007414	axonal defasciculation	0.496598	-0.699974	1	14	1	0.00191571	522	10917	34947	beat-Ia
GO:1901264	carbohydrate derivative transport	0.496598	-0.699974	1	14	1	0.00191571	522	10917	32008	Ant2
GO:0050688	regulation of defense response to virus	0.496598	-0.699974	1	14	1	0.00191571	522	10917	31011	Dredd
GO:0010324	membrane invagination	0.496598	-0.699974	1	14	1	0.00191571	522	10917	39104	pall
GO:0030814	regulation of cAMP metabolic process	0.496598	-0.699974	1	14	1	0.00191571	522	10917	42452	Oct-TyrR
GO:0046545	development of primary female sexual characteristics	0.496598	-0.699974	1	14	1	0.00191571	522	10917	37619	stl
GO:0006911	phagocytosis, engulfment	0.496598	-0.699974	1	14	1	0.00191571	522	10917	39104	pall
GO:0072594	establishment of protein localization to organelle	0.498502	-0.696147	1	118	6	0.0114943	522	10917	4.28434e+29	KrT95D,CG11110,Srp68,cbs,CG10420,Nup44A
GO:0010256	endomembrane system organization	0.498502	-0.696147	1	118	6	0.0114943	522	10917	3.41344e+29	wol,Pkc98E,pcx,Hs3st-B,eca,Syx5
GO:0051130	positive regulation of cellular component organization	0.499453	-0.694241	1	139	7	0.01341	522	10917	3.26965e+34	Arpc3B,ida,sals,TfIIFalpha,Arf79F,BicD,lva
GO:0019693	ribose phosphate metabolic process	0.501542	-0.690069	1	202	10	0.0191571	522	10917	4.08484e+52	alphaTub84B,kappaB-Ras,Rgk1,Pde1c,CG17760,ras,Hmgcr,Prat2,Gyc-89Da,Ppcs
GO:0009259	ribonucleotide metabolic process	0.501542	-0.690069	1	202	10	0.0191571	522	10917	4.08481e+52	alphaTub84B,Rgk1,kappaB-Ras,Pde1c,CG17760,ras,Hmgcr,Prat2,Gyc-89Da,Ppcs
GO:0051674	localization of cell	0.503047	-0.687071	1	265	13	0.0249042	522	10917	4.23564e+66	bnl,btl,Hrs,spin,rols,cp309,spag4,egh,RhoL,Hmgcr,Pvr,how,Ppcs
GO:0008293	torso signaling pathway	0.503996	-0.685187	1	35	2	0.00383142	522	10917	3345831227	Hrs,gt
GO:0006090	pyruvate metabolic process	0.503996	-0.685187	1	35	2	0.00383142	522	10917	4358236020	Tpi,CG1516
GO:0008063	Toll signaling pathway	0.503996	-0.685187	1	35	2	0.00383142	522	10917	3457241943	spz4,Hel89B
GO:0008064	regulation of actin polymerization or depolymerization	0.503996	-0.685187	1	35	2	0.00383142	522	10917	3269641377	Arpc3B,sals
GO:0030832	regulation of actin filament length	0.503996	-0.685187	1	35	2	0.00383142	522	10917	3269641377	Arpc3B,sals
GO:0042326	negative regulation of phosphorylation	0.503996	-0.685187	1	35	2	0.00383142	522	10917	334584379907	Hrs,Mkp
GO:0030162	regulation of proteolysis	0.506444	-0.680343	1	98	5	0.00957854	522	10917	8.67405e+28	Sfp23F,casp,ida,Pde1c,CG34454
GO:0032269	negative regulation of cellular protein metabolic process	0.506444	-0.680343	1	98	5	0.00957854	522	10917	3.34589e+28	Hrs,Sfp23F,casp,bru-3,Mkp
GO:0042335	cuticle development	0.508139	-0.677001	1	224	11	0.0210728	522	10917	3.85104e+55	Cpr64Ac,Doa,e,mmy,wol,yellow-d,svr,f,E(z),yellow-k,TwdlX
GO:0007010	cytoskeleton organization	0.508265	-0.676752	1	622	30	0.0574713	522	10917	3.75804e+153	RpS16,alphaTub84B,cno,rols,CG6118,cbs,cp309,RpL17,Arpc3B,yuri,CG3085,how,Pvr,BicD,Rab6,skap,RpL12,RpL39,RpL10Ab,Sbf,moody,Mical,RpL7,Arf51F,egh,ds,Skeletor,f,mael,Ppcs
GO:0009116	nucleoside metabolic process	0.514222	-0.665099	1	204	10	0.0191571	522	10917	4.08481e+52	alphaTub84B,Rgk1,kappaB-Ras,Adgf-A,CG17760,ras,Hmgcr,Prat2,Gyc-89Da,Ppcs
GO:1903317	regulation of protein maturation	0.51551	-0.662598	1	99	5	0.00957854	522	10917	8.67405e+28	Sfp23F,casp,ida,Pde1c,CG34454
GO:0060562	epithelial tube morphogenesis	0.51551	-0.662598	1	99	5	0.00957854	522	10917	4.23564e+24	bnl,btl,l(1)sc,Pvr,mmy
GO:0070613	regulation of protein processing	0.51551	-0.662598	1	99	5	0.00957854	522	10917	8.67405e+28	Sfp23F,casp,ida,Pde1c,CG34454
GO:0009950	dorsal/ventral axis specification	0.51624	-0.661184	1	78	4	0.00766284	522	10917	4.34284e+19	Pkc98E,mael,BicD,orb
GO:0051057	positive regulation of small GTPase mediated signal transduction	0.517365	-0.659006	1	57	3	0.00574713	522	10917	369294280338412	CG30456,Hmgcr,CG11526
GO:0046579	positive regulation of Ras protein signal transduction	0.517365	-0.659006	1	57	3	0.00574713	522	10917	369294280338412	CG30456,Hmgcr,CG11526
GO:0045165	cell fate commitment	0.519043	-0.655769	1	478	23	0.0440613	522	10917	3.09833e+114	l(1)sc,Dnz1,Osi7,orb,amos,vnd,how,BicD,Xe7,wor,dnc,CG8136,Cyp309a1,btl,stv,pcx,Antp,kn,exex,egh,CG9518,mael,CG31140
GO:0046532	regulation of photoreceptor cell differentiation	0.51915	-0.655563	1	36	2	0.00383142	522	10917	3313939885	S6kII,sinah
GO:0016333	morphogenesis of follicular epithelium	0.51915	-0.655563	1	36	2	0.00383142	522	10917	3123942295	egh,Ppcs
GO:0070374	positive regulation of ERK1 and ERK2 cascade	0.51915	-0.655563	1	36	2	0.00383142	522	10917	4280338412	Hmgcr,CG11526
GO:0002376	immune system process	0.519681	-0.65454	1	268	13	0.0249042	522	10917	4.08484e+64	alphaTub84B,Antp,Sp7,alpha-Man-I,PGRP-SB2,Dredd,Adgf-A,kn,Hel89B,RhoL,LysP,Pvr,Su(var)2-10
GO:1900371	regulation of purine nucleotide biosynthetic process	0.5207	-0.652582	1	15	1	0.00191571	522	10917	42452	Oct-TyrR
GO:0000096	sulfur amino acid metabolic process	0.5207	-0.652582	1	15	1	0.00191571	522	10917	37139	CG5493
GO:0009253	peptidoglycan catabolic process	0.5207	-0.652582	1	15	1	0.00191571	522	10917	39869	PGRP-SB2
GO:0030808	regulation of nucleotide biosynthetic process	0.5207	-0.652582	1	15	1	0.00191571	522	10917	42452	Oct-TyrR
GO:0016348	imaginal disc-derived leg joint morphogenesis	0.5207	-0.652582	1	15	1	0.00191571	522	10917	32918	Hs3st-B
GO:0072528	pyrimidine-containing compound biosynthetic process	0.5207	-0.652582	1	15	1	0.00191571	522	10917	40675	CRMP
GO:0031279	regulation of cyclase activity	0.5207	-0.652582	1	15	1	0.00191571	522	10917	42452	Oct-TyrR
GO:0000046	autophagic vacuole fusion	0.5207	-0.652582	1	15	1	0.00191571	522	10917	37033	fab1
GO:0043277	apoptotic cell clearance	0.5207	-0.652582	1	15	1	0.00191571	522	10917	39104	pall
GO:0006027	glycosaminoglycan catabolic process	0.5207	-0.652582	1	15	1	0.00191571	522	10917	39869	PGRP-SB2
GO:0007509	mesoderm migration involved in gastrulation	0.5207	-0.652582	1	15	1	0.00191571	522	10917	42596	how
GO:0048808	male genitalia morphogenesis	0.5207	-0.652582	1	15	1	0.00191571	522	10917	34127	Pvr
GO:0050919	negative chemotaxis	0.5207	-0.652582	1	15	1	0.00191571	522	10917	34193	Glt
GO:0030802	regulation of cyclic nucleotide biosynthetic process	0.5207	-0.652582	1	15	1	0.00191571	522	10917	42452	Oct-TyrR
GO:0090598	male anatomical structure morphogenesis	0.5207	-0.652582	1	15	1	0.00191571	522	10917	34127	Pvr
GO:0043604	amide biosynthetic process	0.5207	-0.652582	1	15	1	0.00191571	522	10917	42521	e
GO:0030720	oocyte localization involved in germarium-derived egg chamber formation	0.5207	-0.652582	1	15	1	0.00191571	522	10917	31239	egh
GO:0030799	regulation of cyclic nucleotide metabolic process	0.5207	-0.652582	1	15	1	0.00191571	522	10917	42452	Oct-TyrR
GO:0035073	pupariation	0.5207	-0.652582	1	15	1	0.00191571	522	10917	34352	RpL7
GO:0035025	positive regulation of Rho protein signal transduction	0.5207	-0.652582	1	15	1	0.00191571	522	10917	36929	CG30456
GO:0046777	protein autophosphorylation	0.5207	-0.652582	1	15	1	0.00191571	522	10917	43415	Doa
GO:0045456	ecdysteroid biosynthetic process	0.5207	-0.652582	1	15	1	0.00191571	522	10917	2768685	mld
GO:0000270	peptidoglycan metabolic process	0.5207	-0.652582	1	15	1	0.00191571	522	10917	39869	PGRP-SB2
GO:0031399	regulation of protein modification process	0.52225	-0.649609	1	142	7	0.01341	522	10917	4.23563e+36	bnl,LKR,btl,Hrs,Mkk4,Mkp,rb
GO:0006950	response to stress	0.523614	-0.647	1	962	46	0.0881226	522	10917	34088,31764,40620,45380,39709,31011,39704,41136,38252,117365,39991,35275,39703,40664,33764,45318,39708,37033,34024,35927,39707,39701,34524,50133,37912,37949,39700,41943,41384,34127,42001,34636,40450,39710,42852,40054,41020,39273,40918,39869,39976,32260,38301,44121,42132,38636	CG7227,Corp,cno,spin,Eig71Eh,Dredd,Eig71Ed,RhoL,CG1887,HBS1,CG7408,Victoria,Eig71Ec,Itp-r83A,TotM,kn,Eig71Eg,fab1,santa-maria,Su(var)2-10,Eig71Ef,Eig71Eb,aub,CG13551,Letm1,Mmp1,Eig71Ea,Hel89B,CG10898,Pvr,Gyc-89Da,Rab6,CG7130,Eig71Ei,Hsp68,Rad9,Mkk4,CG6168,Sp7,PGRP-SB2,Adgf-A,Fer3HCH,CG8993,TotA,Atg8b,mthl2
GO:0044712	single-organism catabolic process	0.524818	-0.644704	1	290	14	0.0268199	522	10917	4.35824e+72	Tpi,CG9149,alphaTub84B,CRMP,kappaB-Ras,Rgk1,CG17760,P5CDh2,Adgf-A,bmm,Cyp18a1,fab1,Gyc-89Da,Atg8b
GO:0032880	regulation of protein localization	0.526361	-0.641768	1	79	4	0.00766284	522	10917	4.06203e+19	cno,p24-1,S6kII,eca
GO:0042278	purine nucleoside metabolic process	0.527586	-0.639444	1	185	9	0.0172414	522	10917	4.08481e+47	alphaTub84B,Rgk1,kappaB-Ras,Adgf-A,CG17760,ras,Hmgcr,Gyc-89Da,Ppcs
GO:0046128	purine ribonucleoside metabolic process	0.527586	-0.639444	1	185	9	0.0172414	522	10917	4.08481e+47	alphaTub84B,Rgk1,kappaB-Ras,Adgf-A,CG17760,ras,Hmgcr,Gyc-89Da,Ppcs
GO:0021700	developmental maturation	0.52855	-0.637619	1	164	8	0.0153257	522	10917	4.12254e+39	Mical,e,aub,orb,egh,mael,Rab6,BicD
GO:0007611	learning or memory	0.529764	-0.635324	1	143	7	0.01341	522	10917	4.34284e+36	Pkc98E,CRMP,S6kII,svr,mld,rad,dnc
GO:0050890	cognition	0.529764	-0.635324	1	143	7	0.01341	522	10917	4.34284e+36	Pkc98E,CRMP,S6kII,svr,mld,rad,dnc
GO:0048869	cellular developmental process	0.53339	-0.628502	1	2224	106	0.203065	522	10917	43582,40620,45380,41835,33661,39085,39704,41136,35110,33438,41037,43415,40835,31365,45318,35066,34966,32858,34024,42836,39368,33230,33636,37912,37949,42752,5740325,37220,34894,36430,34947,40133,31003,39885,42596,34636,34906,43428,34193,41225,39518,31168,40790,31227,34581,39976,33470,36699,45574,38999,31239,40489,35762,40016,40761,34503,40527,47080,31011,43873,32918,32130,39817,31309,37619,39564,3…	Tpi,cno,spin,CG31344,HP6,aay,Eig71Ed,RhoL,amos,Cyp309a1,CG8136,Doa,Antp,CG15571,kn,Oli,Syx5,Cyp18a1,santa-maria,CG31140,rols,rempA,Atet,Letm1,Mmp1,orb,CG42732,CG9975,yuri,CG13321,beat-Ia,ash1,vnd,sinah,how,Rab6,wor,Pkc98E,Glt,Mical,stv,moody,TfIIFalpha,gt,spag4,Adgf-A,colt,Arf51F,ida,Cp15,egh,mael,Nup44A,skl,Osi7,Dnz1,aux,acj6,Dredd,ras,Hs3st-B,dy,CG4842,dnc,stl,btl,Hrs,pcx,Fur1,Aats-val,mmy,otu,…
GO:0051248	negative regulation of protein metabolic process	0.533432	-0.628424	1	101	5	0.00957854	522	10917	3.34589e+28	Hrs,Sfp23F,casp,bru-3,Mkp
GO:0003333	amino acid transmembrane transport	0.533991	-0.627375	1	37	2	0.00383142	522	10917	4025436331	CG13248,CG8850
GO:0051647	nucleus localization	0.533991	-0.627375	1	37	2	0.00383142	522	10917	4048935051	mael,BicD
GO:0031331	positive regulation of cellular catabolic process	0.533991	-0.627375	1	37	2	0.00383142	522	10917	345243355150	aub,AGO3
GO:0072657	protein localization to membrane	0.533991	-0.627375	1	37	2	0.00383142	522	10917	3902843034	Srp68,CG10420
GO:0051338	regulation of transferase activity	0.536379	-0.622914	1	80	4	0.00766284	522	10917	4.23564e+21	bnl,btl,Mkk4,Mkp
GO:0044270	cellular nitrogen compound catabolic process	0.537232	-0.621324	1	144	7	0.01341	522	10917	4.08484e+37	alphaTub84B,CRMP,kappaB-Ras,Rgk1,Gyc-89Da,CG17760,Adgf-A
GO:1901657	glycosyl compound metabolic process	0.539282	-0.617517	1	208	10	0.0191571	522	10917	4.08484e+52	alphaTub84B,kappaB-Ras,Rgk1,CG17760,Adgf-A,ras,Hmgcr,Prat2,Gyc-89Da,Ppcs
GO:0016485	protein processing	0.540843	-0.614627	1	59	3	0.00574713	522	10917	373374722031011	CG11110,Fur1,Dredd
GO:0030258	lipid modification	0.540843	-0.614627	1	59	3	0.00574713	522	10917	381473703343516	CG9149,fab1,CG7789
GO:0006928	cellular component movement	0.541888	-0.612695	1	589	28	0.0536398	522	10917	3.81705e+141	robl62A,spin,rols,rempA,cp309,acj6,aay,daw,beat-Ia,ras,RhoL,how,Pvr,Rab6,CG10822,Xe7,bnl,btl,Hrs,Glt,Mical,gt,spag4,Oli,egh,Hmgcr,E(z),Ppcs
GO:0007552	metamorphosis	0.542234	-0.612057	1	568	27	0.0517241	522	10917	1.17353e+135	Cct1,Obp99b,Eig71Ef,EloA,Mmp1,Eig71Eh,Eig71Ea,CG6175,Eig71Ed,Cyp301a1,svr,Hs3st-B,dy,how,Pvr,Eig71Ei,CG30456,Doa,S6kII,Eig71Ec,kn,Cyp18a1,f,ds,alpha-Est10,santa-maria,Ppcs
GO:0008592	regulation of Toll signaling pathway	0.543649	-0.609451	1	16	1	0.00191571	522	10917	33458	Hrs
GO:0042045	epithelial fluid transport	0.543649	-0.609451	1	16	1	0.00191571	522	10917	33470	colt
GO:0045841	negative regulation of mitotic metaphase/anaphase transition	0.543649	-0.609451	1	16	1	0.00191571	522	10917	40848	alphaTub84B
GO:0051294	establishment of spindle orientation	0.543649	-0.609451	1	16	1	0.00191571	522	10917	40620	cno
GO:0019511	peptidyl-proline hydroxylation	0.543649	-0.609451	1	16	1	0.00191571	522	10917	43620	PH4alphaEFB
GO:0061162	establishment of monopolar cell polarity	0.543649	-0.609451	1	16	1	0.00191571	522	10917	33245	ds
GO:0061339	establishment or maintenance of monopolar cell polarity	0.543649	-0.609451	1	16	1	0.00191571	522	10917	33245	ds
GO:0046785	microtubule polymerization	0.543649	-0.609451	1	16	1	0.00191571	522	10917	3772382	cp309
GO:0007413	axonal fasciculation	0.543649	-0.609451	1	16	1	0.00191571	522	10917	33903	mmy
GO:0060966	regulation of gene silencing by RNA	0.543649	-0.609451	1	16	1	0.00191571	522	10917	31381	rb
GO:0032509	endosome transport via multivesicular body sorting pathway	0.543649	-0.609451	1	16	1	0.00191571	522	10917	33458	Hrs
GO:0016082	synaptic vesicle priming	0.543649	-0.609451	1	16	1	0.00191571	522	10917	33458	Hrs
GO:0007412	axon target recognition	0.543649	-0.609451	1	16	1	0.00191571	522	10917	38884	exex
GO:0035303	regulation of dephosphorylation	0.543649	-0.609451	1	16	1	0.00191571	522	10917	318751	CG31467
GO:0001964	startle response	0.543649	-0.609451	1	16	1	0.00191571	522	10917	43415	Doa
GO:0030727	germarium-derived female germ-line cyst formation	0.543649	-0.609451	1	16	1	0.00191571	522	10917	35051	BicD
GO:0018126	protein hydroxylation	0.543649	-0.609451	1	16	1	0.00191571	522	10917	43620	PH4alphaEFB
GO:0007584	response to nutrient	0.543649	-0.609451	1	16	1	0.00191571	522	10917	36589	Ih
GO:0019471	4-hydroxyproline metabolic process	0.543649	-0.609451	1	16	1	0.00191571	522	10917	43620	PH4alphaEFB
GO:0009649	entrainment of circadian clock	0.543649	-0.609451	1	16	1	0.00191571	522	10917	33705	jet
GO:0046330	positive regulation of JNK cascade	0.543649	-0.609451	1	16	1	0.00191571	522	10917	41020	Mkk4
GO:0045476	nurse cell apoptotic process	0.543649	-0.609451	1	16	1	0.00191571	522	10917	45380	spin
GO:0035112	genitalia morphogenesis	0.543649	-0.609451	1	16	1	0.00191571	522	10917	34127	Pvr
GO:0051339	regulation of lyase activity	0.543649	-0.609451	1	16	1	0.00191571	522	10917	42452	Oct-TyrR
GO:0045676	regulation of R7 cell differentiation	0.543649	-0.609451	1	16	1	0.00191571	522	10917	39885	sinah
GO:0048854	brain morphogenesis	0.543649	-0.609451	1	16	1	0.00191571	522	10917	43415	Doa
GO:0045494	photoreceptor cell maintenance	0.543649	-0.609451	1	16	1	0.00191571	522	10917	43415	Doa
GO:0060025	regulation of synaptic activity	0.543649	-0.609451	1	16	1	0.00191571	522	10917	42473	CG3822
GO:0018401	peptidyl-proline hydroxylation to 4-hydroxy-L-proline	0.543649	-0.609451	1	16	1	0.00191571	522	10917	43620	PH4alphaEFB
GO:1902100	negative regulation of metaphase/anaphase transition of cell cycle	0.543649	-0.609451	1	16	1	0.00191571	522	10917	40848	alphaTub84B
GO:0031328	positive regulation of cellular biosynthetic process	0.543991	-0.608823	1	336	16	0.0306513	522	10917	3.09833e+79	l(1)sc,aub,EloA,acj6,Dredd,Hrb98DE,orb,Hel89B,vnd,ash1,wor,Sbf,TfIIFalpha,tomb,Antp,otu
GO:0009891	positive regulation of biosynthetic process	0.543991	-0.608823	1	336	16	0.0306513	522	10917	3.09833e+79	l(1)sc,aub,EloA,acj6,Dredd,Hrb98DE,orb,Hel89B,vnd,ash1,wor,Sbf,TfIIFalpha,tomb,Antp,otu
GO:0051222	positive regulation of protein transport	0.548516	-0.600538	1	38	2	0.00383142	522	10917	3214041177	p24-1,eca
GO:0033044	regulation of chromosome organization	0.548516	-0.600538	1	38	2	0.00383142	522	10917	3406432353	LKR,mamo
GO:0031032	actomyosin structure organization	0.552332	-0.593605	1	60	3	0.00574713	522	10917	393684122542596	rols,Mical,how
GO:0046488	phosphatidylinositol metabolic process	0.552332	-0.593605	1	60	3	0.00574713	522	10917	370334351636049	fab1,CG7789,CG2292
GO:0006417	regulation of translation	0.556091	-0.586824	1	82	4	0.00766284	522	10917	3.95273e+19	bru-3,aub,Hrb98DE,orb
GO:0009101	glycoprotein biosynthetic process	0.556091	-0.586824	1	82	4	0.00766284	522	10917	3.41344e+19	wol,Arf51F,Arf79F,alpha-Man-I
GO:0007480	imaginal disc-derived leg morphogenesis	0.556091	-0.586824	1	82	4	0.00766284	522	10917	3.69293e+19	CG30456,Cyp18a1,ds,Hs3st-B
GO:0006399	tRNA metabolic process	0.556091	-0.586824	1	82	4	0.00766284	522	10917	3.98293e+19	Aats-tyr,l(2)35Bc,Aats-gly,Aats-val
GO:0009880	embryonic pattern specification	0.557771	-0.583807	1	211	10	0.0191571	522	10917	4.34153e+49	Doa,gt,aub,Antp,orb,kn,wol,mael,Rab6,BicD
GO:0030036	actin cytoskeleton organization	0.557771	-0.583807	1	211	10	0.0191571	522	10917	4.14274e+49	Sbf,rols,Mical,moody,Arf51F,Arpc3B,Pvr,how,f,Ppcs
GO:0048469	cell maturation	0.559343	-0.580993	1	147	7	0.01341	522	10917	3.12394e+34	egh,Mical,mael,aub,BicD,Rab6,orb
GO:0007349	cellularization	0.559735	-0.580291	1	104	5	0.00957854	522	10917	3.48943e+24	yuri,aub,lva,aux,Dredd
GO:0009156	ribonucleoside monophosphate biosynthetic process	0.562721	-0.574972	1	39	2	0.00383142	522	10917	4387338753	ras,Prat2
GO:0070372	regulation of ERK1 and ERK2 cascade	0.562721	-0.574972	1	39	2	0.00383142	522	10917	4280338412	Hmgcr,CG11526
GO:0048865	stem cell fate commitment	0.562721	-0.574972	1	39	2	0.00383142	522	10917	3100330983	vnd,l(1)sc
GO:0045786	negative regulation of cell cycle	0.562721	-0.574972	1	39	2	0.00383142	522	10917	4084834966	alphaTub84B,Syx5
GO:0040012	regulation of locomotion	0.562721	-0.574972	1	39	2	0.00383142	522	10917	4235633458	bnl,Hrs
GO:0006023	aminoglycan biosynthetic process	0.565502	-0.570042	1	17	1	0.00191571	522	10917	33903	mmy
GO:0015850	organic hydroxy compound transport	0.565502	-0.570042	1	17	1	0.00191571	522	10917	33470	colt
GO:0070304	positive regulation of stress-activated protein kinase signaling cascade	0.565502	-0.570042	1	17	1	0.00191571	522	10917	41020	Mkk4
GO:0006400	tRNA modification	0.565502	-0.570042	1	17	1	0.00191571	522	10917	34876	l(2)35Bc
GO:0016125	sterol metabolic process	0.565502	-0.570042	1	17	1	0.00191571	522	10917	2768685	mld
GO:0009826	unidimensional cell growth	0.565502	-0.570042	1	17	1	0.00191571	522	10917	40620	cno
GO:0097285	cell-type specific apoptotic process	0.565502	-0.570042	1	17	1	0.00191571	522	10917	45380	spin
GO:0042493	response to drug	0.565502	-0.570042	1	17	1	0.00191571	522	10917	31957	alpha-Man-I
GO:0000245	spliceosomal complex assembly	0.565502	-0.570042	1	17	1	0.00191571	522	10917	36619	tra2
GO:0060857	establishment of glial blood-brain barrier	0.565502	-0.570042	1	17	1	0.00191571	522	10917	31168	moody
GO:0051568	histone H3-K4 methylation	0.565502	-0.570042	1	17	1	0.00191571	522	10917	40133	ash1
GO:0006469	negative regulation of protein kinase activity	0.565502	-0.570042	1	17	1	0.00191571	522	10917	4379907	Mkp
GO:0000090	mitotic anaphase	0.565502	-0.570042	1	17	1	0.00191571	522	10917	45574	ida
GO:0033673	negative regulation of kinase activity	0.565502	-0.570042	1	17	1	0.00191571	522	10917	4379907	Mkp
GO:0032874	positive regulation of stress-activated MAPK cascade	0.565502	-0.570042	1	17	1	0.00191571	522	10917	41020	Mkk4
GO:0072348	sulfur compound transport	0.565502	-0.570042	1	17	1	0.00191571	522	10917	43561	CG7912
GO:0007392	initiation of dorsal closure	0.565502	-0.570042	1	17	1	0.00191571	522	10917	40620	cno
GO:0006275	regulation of DNA replication	0.565502	-0.570042	1	17	1	0.00191571	522	10917	31789	otu
GO:0007303	cytoplasmic transport, nurse cell to oocyte	0.565502	-0.570042	1	17	1	0.00191571	522	10917	42295	Ppcs
GO:1902742	apoptotic process involved in development	0.565502	-0.570042	1	17	1	0.00191571	522	10917	45380	spin
GO:0035186	syncytial blastoderm mitotic cell cycle	0.565502	-0.570042	1	17	1	0.00191571	522	10917	39203	E(z)
GO:0007478	leg disc morphogenesis	0.565777	-0.569556	1	83	4	0.00766284	522	10917	3.69293e+19	CG30456,Cyp18a1,ds,Hs3st-B
GO:0042048	olfactory behavior	0.568338	-0.565039	1	105	5	0.00957854	522	10917	4.34973e+24	Obp99b,Pino,rad,CG9664,dnc
GO:0008595	anterior/posterior axis specification, embryo	0.571057	-0.560266	1	127	6	0.0114943	522	10917	3.12274e+29	gt,mael,aub,BicD,Rab6,orb
GO:0007351	tripartite regional subdivision	0.571057	-0.560266	1	127	6	0.0114943	522	10917	3.12274e+29	gt,mael,aub,BicD,Rab6,orb
GO:0042067	establishment of ommatidial planar polarity	0.574791	-0.553748	1	62	3	0.00574713	522	10917	1173534062033240	Cct1,cno,ds
GO:0051604	protein maturation	0.574791	-0.553748	1	62	3	0.00574713	522	10917	373374722031011	CG11110,Fur1,Dredd
GO:0016050	vesicle organization	0.574791	-0.553748	1	62	3	0.00574713	522	10917	334583138140221	Hrs,rb,Clc
GO:0009100	glycoprotein metabolic process	0.575346	-0.552784	1	84	4	0.00766284	522	10917	3.41344e+19	wol,Arf51F,Arf79F,alpha-Man-I
GO:0007017	microtubule-based process	0.575428	-0.552642	1	513	24	0.045977	522	10917	3.75804e+123	RpS16,alphaTub84B,cno,robl62A,rempA,CG6118,cp309,cbs,RpL17,yuri,CG3085,Pvr,Rab6,BicD,CG10822,skap,RpL12,RpL39,RpL10Ab,RpL7,egh,mael,ds,Skeletor
GO:0035010	encapsulation of foreign target	0.576602	-0.550603	1	40	2	0.00383142	522	10917	4113631957	RhoL,alpha-Man-I
GO:0043297	apical junction assembly	0.576602	-0.550603	1	40	2	0.00383142	522	10917	3413431168	wol,moody
GO:0019318	hexose metabolic process	0.576602	-0.550603	1	40	2	0.00383142	522	10917	3807636020	Gale,CG1516
GO:0009124	nucleoside monophosphate biosynthetic process	0.576602	-0.550603	1	40	2	0.00383142	522	10917	4387338753	ras,Prat2
GO:0071478	cellular response to radiation	0.576602	-0.550603	1	40	2	0.00383142	522	10917	3527544121	Victoria,TotA
GO:0035023	regulation of Rho protein signal transduction	0.576602	-0.550603	1	40	2	0.00383142	522	10917	369293772539	CG30456,Spec2
GO:0048599	oocyte development	0.578804	-0.546791	1	128	6	0.0114943	522	10917	3.12394e+29	egh,mael,aub,BicD,Rab6,orb
GO:0007417	central nervous system development	0.578865	-0.546686	1	236	11	0.0210728	522	10917	3.95645e+54	btl,spin,Doa,l(1)sc,moody,Itp-r83A,mmy,exex,vnd,Pvr,wor
GO:0019538	protein metabolic process	0.581065	-0.542892	1	1910	90	0.172414	522	10917	37580,34958,38648,32635,41303,37808,35181,43564,34064,43415,32238,34024,42556,31957,37949,33284,40133,39885,3355173,31381,45329,43428,39273,39518,36049,33893,34352,34134,36699,4379907,317885,42203,39121,326263,34067,31776,37309,41343,3885606,40741,34503,40527,31011,33705,32234,34859,117365,31315,37619,39564,37849,33458,39338,47220,246384,45783,31789,42449,35902,32532,37033,39203,42754,59137,37337…	RpS16,CG17329,scny,RpS19a,CG4565,fzr2,CG10702,RpS28a,LKR,Doa,CG4661,santa-maria,CG5849,alpha-Man-I,Mmp1,CG4629,ash1,sinah,Pp1-Y2,rb,RpL12,Pkc98E,CG6168,stv,CG2292,CG42370,RpL7,wol,Arf51F,Mkp,CG32152,PKD,CG8336,CG33128,cdc14,CG1440,CG11192,RpS25,CG34043,CG11459,Dnz1,aux,Dredd,jet,CG3775,CG4650,HBS1,CG16781,stl,btl,RpL39,Hrs,RpL10Ab,Fur1,CG30002,Aats-val,otu,Nep4,CG8213,CG8974,fab1,E(z),CG6763,CG18…
GO:0010557	positive regulation of macromolecule biosynthetic process	0.581993	-0.541297	1	301	14	0.0268199	522	10917	4.14273e+69	Sbf,tomb,TfIIFalpha,l(1)sc,Antp,aub,EloA,otu,acj6,Hrb98DE,orb,vnd,ash1,wor
GO:0018130	heterocycle biosynthetic process	0.583613	-0.538517	1	387	18	0.0344828	522	10917	3.93014e+89	CG7368,EloA,kar,ras,CG2246,Gyc-89Da,CG8417,rb,CRMP,TfIIFalpha,Taf12L,Adgf-A,CG8080,bw,se,Prat2,pug,Ppcs
GO:0035282	segmentation	0.58457	-0.536879	1	237	11	0.0210728	522	10917	4.34153e+54	Doa,gt,aub,Antp,orb,kn,wol,Hs3st-B,mael,Rab6,BicD
GO:0051173	positive regulation of nitrogen compound metabolic process	0.584752	-0.536568	1	323	15	0.0287356	522	10917	4.14273e+76	Sbf,tomb,TfIIFalpha,l(1)sc,Antp,aub,EloA,otu,acj6,Dredd,Hel89B,vnd,ash1,AGO3,wor
GO:0051050	positive regulation of transport	0.584794	-0.536495	1	85	4	0.00766284	522	10917	3.21404e+19	p24-1,Arf79F,BicD,eca
GO:0006470	protein dephosphorylation	0.584794	-0.536495	1	85	4	0.00766284	522	10917	3.10744e+23	CG32812,Mkp,Pp1-Y2,cdc14
GO:0009119	ribonucleoside metabolic process	0.585572	-0.535166	1	194	9	0.0172414	522	10917	4.08481e+47	alphaTub84B,Rgk1,kappaB-Ras,Adgf-A,CG17760,ras,Hmgcr,Gyc-89Da,Ppcs
GO:0007088	regulation of mitosis	0.585754	-0.534855	1	63	3	0.00574713	522	10917	455744084834067	ida,alphaTub84B,cdc14
GO:0045216	cell-cell junction organization	0.585754	-0.534855	1	63	3	0.00574713	522	10917	341343116833062	wol,moody,shakB
GO:0034330	cell junction organization	0.585754	-0.534855	1	63	3	0.00574713	522	10917	341343116833062	wol,moody,shakB
GO:0009581	detection of external stimulus	0.585754	-0.534855	1	63	3	0.00574713	522	10917	330624523434024	shakB,Ggamma30A,santa-maria
GO:0009582	detection of abiotic stimulus	0.585754	-0.534855	1	63	3	0.00574713	522	10917	330624523434024	shakB,Ggamma30A,santa-maria
GO:0006378	mRNA polyadenylation	0.58631	-0.533907	1	18	1	0.00191571	522	10917	42752	orb
GO:0035058	nonmotile primary cilium assembly	0.58631	-0.533907	1	18	1	0.00191571	522	10917	33230	rempA
GO:0007483	genital disc morphogenesis	0.58631	-0.533907	1	18	1	0.00191571	522	10917	34127	Pvr
GO:0030539	male genitalia development	0.58631	-0.533907	1	18	1	0.00191571	522	10917	34127	Pvr
GO:0001895	retina homeostasis	0.58631	-0.533907	1	18	1	0.00191571	522	10917	43415	Doa
GO:0048135	female germ-line cyst formation	0.58631	-0.533907	1	18	1	0.00191571	522	10917	35051	BicD
GO:1901992	positive regulation of mitotic cell cycle phase transition	0.58631	-0.533907	1	18	1	0.00191571	522	10917	45574	ida
GO:1901989	positive regulation of cell cycle phase transition	0.58631	-0.533907	1	18	1	0.00191571	522	10917	45574	ida
GO:0015748	organophosphate ester transport	0.58631	-0.533907	1	18	1	0.00191571	522	10917	32008	Ant2
GO:0045839	negative regulation of mitosis	0.58631	-0.533907	1	18	1	0.00191571	522	10917	40848	alphaTub84B
GO:0090174	organelle membrane fusion	0.58631	-0.533907	1	18	1	0.00191571	522	10917	37033	fab1
GO:0031987	locomotion involved in locomotory behavior	0.58631	-0.533907	1	18	1	0.00191571	522	10917	43415	Doa
GO:0090287	regulation of cellular response to growth factor stimulus	0.58631	-0.533907	1	18	1	0.00191571	522	10917	33458	Hrs
GO:0035290	trunk segmentation	0.58631	-0.533907	1	18	1	0.00191571	522	10917	40835	Antp
GO:0018993	somatic sex determination	0.58631	-0.533907	1	18	1	0.00191571	522	10917	36619	tra2
GO:0031099	regeneration	0.58631	-0.533907	1	18	1	0.00191571	522	10917	37949	Mmp1
GO:0052652	cyclic purine nucleotide metabolic process	0.58631	-0.533907	1	18	1	0.00191571	522	10917	42001	Gyc-89Da
GO:0051049	regulation of transport	0.589878	-0.52784	1	173	8	0.0153257	522	10917	3.27994e+39	Frq2,Arf79F,S6kII,Frq1,eca,p24-1,BicD,Ih
GO:0051270	regulation of cellular component movement	0.590159	-0.527364	1	41	2	0.00383142	522	10917	4235633458	bnl,Hrs
GO:0016337	single organismal cell-cell adhesion	0.590159	-0.527364	1	41	2	0.00383142	522	10917	3123933245	egh,ds
GO:0030010	establishment of cell polarity	0.590159	-0.527364	1	41	2	0.00383142	522	10917	4062033245	cno,ds
GO:0007350	blastoderm segmentation	0.591815	-0.524561	1	195	9	0.0172414	522	10917	4.34153e+44	Doa,gt,aub,Antp,orb,kn,mael,Rab6,BicD
GO:0009314	response to radiation	0.595104	-0.519019	1	152	7	0.01341	522	10917	3.37054e+34	jet,Victoria,shakB,Ggamma30A,santa-maria,TotA,verm
GO:0050789	regulation of biological process	0.595447	-0.518443	1	3053	144	0.275862	522	10917	36769,45380,38648,41136,35110,33062,40956,35181,34064,41377,43415,40835,40664,34594,34966,45318,43495,38412,42836,32799,39150,39611,41943,31003,39885,45234,34636,43428,40675,40790,47894,31227,36385,39976,36699,31239,4379907,32260,40489,31601,42203,31807,3355150,35762,38636,35667,37883,34485,40527,47080,42869,31011,32089,117365,31309,39564,33458,8674054,31204,31789,3772539,39527,32140,5740130,3592…	casp,spin,scny,RhoL,amos,shakB,CG7910,CG10702,LKR,sals,Doa,Antp,Itp-r83A,Pde1c,Syx5,kn,dmrt99B,CG11526,CG31140,Frq2,Ilp2,bmm,Hel89B,vnd,sinah,Ggamma30A,Rab6,Pkc98E,CRMP,TfIIFalpha,hbn,gt,CG17760,Adgf-A,Arf51F,egh,Mkp,Fer3HCH,mael,Ctr1A,PKD,CG11294,AGO3,Nup44A,mthl2,kappaB-Ras,CG13575,CG17124,aux,acj6,CG6182,Dredd,Sk1,HBS1,dnc,btl,Hrs,Sfp23F,pcx,otu,Spec2,bru-3,p24-1,CG34454,Su(var)2-10,Sesn,Pino,…
GO:0010638	positive regulation of organelle organization	0.596535	-0.516618	1	64	3	0.00574713	522	10917	326964557441377	Arpc3B,ida,sals
GO:0007616	long-term memory	0.596535	-0.516618	1	64	3	0.00574713	522	10917	4.34283e+16	Pkc98E,svr,mld
GO:0006955	immune response	0.598013	-0.514143	1	196	9	0.0172414	522	10917	4.08484e+44	alphaTub84B,Sp7,PGRP-SB2,Dredd,kn,Hel89B,LysP,RhoL,Pvr
GO:0050794	regulation of cellular process	0.599551	-0.511574	1	2824	133	0.254789	522	10917	31764,36769,40620,45380,38648,37249,42749,32696,41960,39151,41136,35110,31953,31220,37079,33062,40956,35181,34064,36929,41377,43415,40835,40664,34594,42452,35066,34966,45318,43495,34024,318751,32864,38412,36589,42836,32245,32799,42521,39150,42752,33284,41943,31003,40133,42596,39885,45234,34636,31381,34906,41067,43428,41427,40675,31168,40790,47894,31227,32253,36385,33248,36699,45574,4379907,32260,…	Corp,casp,cno,spin,scny,CG11007,EloA,Arpc3B,CG5916,Ilp3,RhoL,amos,CG34408,Ilp6,MED9,shakB,CG7910,CG10702,LKR,CG30456,sals,Doa,Antp,Itp-r83A,Pde1c,Oct-TyrR,Oli,Syx5,kn,dmrt99B,santa-maria,CG31467,CCKLR-17D3,CG11526,Ih,CG31140,fne,Frq2,e,Ilp2,orb,CG4629,Hel89B,vnd,ash1,how,sinah,Ggamma30A,Rab6,rb,wor,skap,Pkc98E,Sbf,CRMP,moody,TfIIFalpha,hbn,gt,rad,CG17760,GABA-B-R3,Arf51F,ida,Mkp,Fer3HCH,Rab8,mael…
GO:0007052	mitotic spindle organization	0.599703	-0.511321	1	218	10	0.0191571	522	10917	4.53294e+49	RpL12,RpS16,alphaTub84B,RpL39,RpL10Ab,CG6118,RpL7,RpL17,Pvr,skap
GO:0046328	regulation of JNK cascade	0.60339	-0.505192	1	42	2	0.00383142	522	10917	4102040620	Mkk4,cno
GO:0050830	defense response to Gram-positive bacterium	0.60339	-0.505192	1	42	2	0.00383142	522	10917	5013333764	CG13551,TotM
GO:0016579	protein deubiquitination	0.60339	-0.505192	1	42	2	0.00383142	522	10917	3864831789	scny,otu
GO:0098602	single organism cell adhesion	0.60339	-0.505192	1	42	2	0.00383142	522	10917	3123933245	egh,ds
GO:0035006	melanization defense response	0.60339	-0.505192	1	42	2	0.00383142	522	10917	4113640918	RhoL,Sp7
GO:0098656	anion transmembrane transport	0.60339	-0.505192	1	42	2	0.00383142	522	10917	4025436331	CG13248,CG8850
GO:0048667	cell morphogenesis involved in neuron differentiation	0.605849	-0.501124	1	435	20	0.0383142	522	10917	3.96445e+99	Aats-gly,acj6,aay,daw,beat-Ia,ras,amos,Rab6,wor,Xe7,dnc,Glt,Mical,gt,Oli,kn,exex,egh,E(z),wrapper
GO:0097193	intrinsic apoptotic signaling pathway	0.606123	-0.500672	1	19	1	0.00191571	522	10917	31764	Corp
GO:0019751	polyol metabolic process	0.606123	-0.500672	1	19	1	0.00191571	522	10917	32285	IP3K2
GO:0007446	imaginal disc growth	0.606123	-0.500672	1	19	1	0.00191571	522	10917	35927	Su(var)2-10
GO:0042398	cellular modified amino acid biosynthetic process	0.606123	-0.500672	1	19	1	0.00191571	522	10917	41279	pug
GO:0060856	establishment of blood-brain barrier	0.606123	-0.500672	1	19	1	0.00191571	522	10917	31168	moody
GO:0060969	negative regulation of gene silencing	0.606123	-0.500672	1	19	1	0.00191571	522	10917	31381	rb
GO:0043631	RNA polyadenylation	0.606123	-0.500672	1	19	1	0.00191571	522	10917	42752	orb
GO:0042044	fluid transport	0.606123	-0.500672	1	19	1	0.00191571	522	10917	33470	colt
GO:0051051	negative regulation of transport	0.606123	-0.500672	1	19	1	0.00191571	522	10917	33139	S6kII
GO:0043901	negative regulation of multi-organism process	0.606123	-0.500672	1	19	1	0.00191571	522	10917	36769	casp
GO:0051322	anaphase	0.606123	-0.500672	1	19	1	0.00191571	522	10917	45574	ida
GO:0030497	fatty acid elongation	0.606123	-0.500672	1	19	1	0.00191571	522	10917	326148	CG31523
GO:0031109	microtubule polymerization or depolymerization	0.606123	-0.500672	1	19	1	0.00191571	522	10917	3772382	cp309
GO:0007475	apposition of dorsal and ventral imaginal disc-derived wing surfaces	0.606123	-0.500672	1	19	1	0.00191571	522	10917	42596	how
GO:0045815	positive regulation of gene expression, epigenetic	0.606123	-0.500672	1	19	1	0.00191571	522	10917	40133	ash1
GO:0033301	cell cycle comprising mitosis without cytokinesis	0.606123	-0.500672	1	19	1	0.00191571	522	10917	39203	E(z)
GO:0051348	negative regulation of transferase activity	0.606123	-0.500672	1	19	1	0.00191571	522	10917	4379907	Mkp
GO:0007538	primary sex determination	0.606123	-0.500672	1	19	1	0.00191571	522	10917	31789	otu
GO:0040040	thermosensory behavior	0.606123	-0.500672	1	19	1	0.00191571	522	10917	31309	dnc
GO:0061326	renal tubule development	0.607131	-0.499011	1	65	3	0.00574713	522	10917	393683098334127	rols,l(1)sc,Pvr
GO:0072002	Malpighian tubule development	0.607131	-0.499011	1	65	3	0.00574713	522	10917	393683098334127	rols,l(1)sc,Pvr
GO:0051223	regulation of protein transport	0.607131	-0.499011	1	65	3	0.00574713	522	10917	321403313941177	p24-1,S6kII,eca
GO:0042221	response to chemical	0.608798	-0.49627	1	842	39	0.0747126	522	10917	4.70804e+198	acj6,aay,Ilp3,ras,Ilp6,dnc,btl,Oli,Hmgcr,E(z),CG9664,Ih,Pino,Obp99b,alpha-Man-I,Ilp2,Letm1,daw,beat-Ia,Ggamma30A,CG30344,Pvr,Ir62a,Gyc-89Da,Rab6,Xe7,bnl,Hsp68,Pkc98E,Glt,moody,Mical,gt,CG5189,rad,Ir51b,Arf51F,egh,TotA
GO:0000578	embryonic axis specification	0.609068	-0.495826	1	132	6	0.0114943	522	10917	3.12274e+29	gt,mael,aub,BicD,Rab6,orb
GO:0008038	neuron recognition	0.610002	-0.494292	1	110	5	0.00957854	522	10917	3.49473e+24	beat-Ia,Glt,Fur1,mmy,acj6
GO:0007276	gamete generation	0.610728	-0.493104	1	800	37	0.0708812	522	10917	4.53804e+185	spin,aux,Dredd,tra2,ras,RhoL,dnc,stl,btl,Hrs,Doa,CG15571,Taf12L,otu,Syx5,Cyp18a1,Hmgcr,Ppcs,Cct1,rols,aub,orb,Hrb98DE,yuri,Cp38,ash1,Pvr,how,BicD,Rab6,spag4,Arf51F,egh,Cp15,mael,mamo,Nup44A
GO:0009790	embryo development	0.614244	-0.487363	1	523	24	0.045977	522	10917	4.06203e+121	cno,l(1)sc,aub,cp309,orb,RhoL,ash1,how,Pvr,BicD,Rab6,KCNQ,Doa,gt,Antp,mmy,kn,Ptr,wol,egh,Myo10A,Hmgcr,mael,E(z)
GO:0009896	positive regulation of catabolic process	0.616296	-0.484028	1	43	2	0.00383142	522	10917	345243355150	aub,AGO3
GO:0030537	larval behavior	0.616296	-0.484028	1	43	2	0.00383142	522	10917	4066439150	Itp-r83A,Ilp2
GO:0005996	monosaccharide metabolic process	0.616296	-0.484028	1	43	2	0.00383142	522	10917	3807636020	Gale,CG1516
GO:0031146	SCF-dependent proteasomal ubiquitin-dependent protein catabolic process	0.616296	-0.484028	1	43	2	0.00383142	522	10917	3370539104	jet,pall
GO:0070302	regulation of stress-activated protein kinase signaling cascade	0.616296	-0.484028	1	43	2	0.00383142	522	10917	4102040620	Mkk4,cno
GO:0032872	regulation of stress-activated MAPK cascade	0.616296	-0.484028	1	43	2	0.00383142	522	10917	4102040620	Mkk4,cno
GO:0022618	ribonucleoprotein complex assembly	0.616296	-0.484028	1	43	2	0.00383142	522	10917	3661934524	tra2,aub
GO:0034655	nucleobase-containing compound catabolic process	0.616444	-0.483787	1	133	6	0.0114943	522	10917	4.08484e+32	alphaTub84B,kappaB-Ras,Rgk1,Gyc-89Da,CG17760,Adgf-A
GO:0006914	autophagy	0.617541	-0.48201	1	66	3	0.00574713	522	10917	370334213237755	fab1,Atg8b,Sesn
GO:1900542	regulation of purine nucleotide metabolic process	0.62134	-0.475877	1	89	4	0.00766284	522	10917	4.19603e+19	CG5916,rad,Oct-TyrR,CG6182
GO:0061061	muscle structure development	0.6228	-0.473529	1	222	10	0.0191571	522	10917	4.35824e+49	Tpi,btl,rols,l(1)sc,Mical,Antp,kn,Arf51F,how,E(z)
GO:0009628	response to abiotic stimulus	0.624577	-0.470681	1	353	16	0.0306513	522	10917	4.28524e+79	Hsp68,Tpi,Victoria,Letm1,TotM,verm,Hdc,jet,yuri,shakB,Ggamma30A,Gyc-89Da,santa-maria,TotA,CG7130,dnc
GO:0042446	hormone biosynthetic process	0.624989	-0.470021	1	20	1	0.00191571	522	10917	2768685	mld
GO:0006506	GPI anchor biosynthetic process	0.624989	-0.470021	1	20	1	0.00191571	522	10917	36049	CG2292
GO:0006006	glucose metabolic process	0.624989	-0.470021	1	20	1	0.00191571	522	10917	36020	CG1516
GO:0071806	protein transmembrane transport	0.624989	-0.470021	1	20	1	0.00191571	522	10917	43034	CG10420
GO:0065002	intracellular protein transmembrane transport	0.624989	-0.470021	1	20	1	0.00191571	522	10917	43034	CG10420
GO:0022407	regulation of cell-cell adhesion	0.624989	-0.470021	1	20	1	0.00191571	522	10917	41136	RhoL
GO:0051784	negative regulation of nuclear division	0.624989	-0.470021	1	20	1	0.00191571	522	10917	40848	alphaTub84B
GO:0007279	pole cell formation	0.624989	-0.470021	1	20	1	0.00191571	522	10917	34524	aub
GO:0019932	second-messenger-mediated signaling	0.624989	-0.470021	1	20	1	0.00191571	522	10917	31309	dnc
GO:0008037	cell recognition	0.626002	-0.468402	1	112	5	0.00957854	522	10917	3.49473e+24	beat-Ia,Glt,Fur1,mmy,acj6
GO:0016311	dephosphorylation	0.626002	-0.468402	1	112	5	0.00957854	522	10917	3.10744e+28	CG32812,Mkp,Sbf,Pp1-Y2,cdc14
GO:0008544	epidermis development	0.627763	-0.465593	1	67	3	0.00574713	522	10917	406203324532718	cno,ds,f
GO:0043588	skin development	0.627763	-0.465593	1	67	3	0.00574713	522	10917	406203324532718	cno,ds,f
GO:0051783	regulation of nuclear division	0.627763	-0.465593	1	67	3	0.00574713	522	10917	455744084834067	ida,alphaTub84B,cdc14
GO:0032318	regulation of Ras GTPase activity	0.627763	-0.465593	1	67	3	0.00574713	522	10917	419603225342869	CG5916,rad,CG6182
GO:0030261	chromosome condensation	0.628877	-0.46382	1	44	2	0.00383142	522	10917	3452435927	aub,Su(var)2-10
GO:0016441	posttranscriptional gene silencing	0.628877	-0.46382	1	44	2	0.00383142	522	10917	345243355150	aub,AGO3
GO:0035194	posttranscriptional gene silencing by RNA	0.628877	-0.46382	1	44	2	0.00383142	522	10917	345243355150	aub,AGO3
GO:0016477	cell migration	0.628924	-0.463744	1	245	11	0.0210728	522	10917	4.23564e+54	bnl,btl,Hrs,spin,rols,egh,RhoL,Hmgcr,Pvr,how,Ppcs
GO:0044767	single-organism developmental process	0.631415	-0.459791	1	3199	150	0.287356	522	10917	43582,45380,41835,45883,33661,39085,41136,35110,41037,43415,40835,40664,31365,45318,34966,32858,42836,39368,33230,3772382,33636,37912,39150,39611,39700,5740325,34894,36430,31003,39885,34636,43428,34193,40790,31227,34581,39976,34352,33470,34134,36699,38999,31239,40489,40896,38636,35762,40150,40527,47080,31011,39709,40149,43873,39817,44135,31309,39564,33458,47220,31204,31789,32416,32140,33862,40094…	Tpi,spin,CG31344,kar,HP6,aay,RhoL,amos,CG8136,Doa,Antp,Itp-r83A,CG15571,kn,Syx5,Cyp18a1,CG31140,rols,rempA,cp309,Atet,Letm1,Ilp2,bmm,Eig71Ea,CG42732,yuri,CG13321,vnd,sinah,Rab6,Pkc98E,Glt,TfIIFalpha,gt,spag4,Adgf-A,RpL7,colt,wol,Arf51F,Cp15,egh,mael,alpha-Est10,mthl2,Nup44A,serp,aux,acj6,Dredd,Eig71Eh,verm,ras,CG4842,ect,dnc,btl,Hrs,Fur1,pcx,otu,CG9518,p24-1,CG9175,Bet1,yellow-k,Su(var)2-10,Sesn,…
GO:0007309	oocyte axis specification	0.633853	-0.455939	1	113	5	0.00957854	522	10917	4.04893e+24	mael,aub,BicD,Rab6,orb
GO:0007283	spermatogenesis	0.634091	-0.455564	1	224	10	0.0191571	522	10917	3.36724e+49	Taf12L,aux,spag4,Dredd,Syx5,yuri,tra2,Arf51F,mael,how
GO:0048477	oogenesis	0.636333	-0.452033	1	572	26	0.0498084	522	10917	1.17353e+130	Cct1,spin,rols,aub,Hrb98DE,orb,Cp38,ras,RhoL,ash1,Pvr,BicD,Rab6,dnc,stl,btl,Hrs,Doa,CG15571,otu,Cp15,egh,Cyp18a1,mael,Ppcs,Nup44A
GO:0048232	male gamete generation	0.639668	-0.446806	1	225	10	0.0191571	522	10917	3.36724e+49	Taf12L,aux,spag4,Dredd,Syx5,yuri,tra2,Arf51F,mael,how
GO:0040007	growth	0.640976	-0.444764	1	181	8	0.0153257	522	10917	3.34744e+39	daw,cno,scny,Ilp2,Mmp1,Su(var)2-10,verm,dnc
GO:0007443	Malpighian tubule morphogenesis	0.641135	-0.444515	1	45	2	0.00383142	522	10917	3098334127	l(1)sc,Pvr
GO:0044242	cellular lipid catabolic process	0.641135	-0.444515	1	45	2	0.00383142	522	10917	3814739611	CG9149,bmm
GO:0061333	renal tubule morphogenesis	0.641135	-0.444515	1	45	2	0.00383142	522	10917	3098334127	l(1)sc,Pvr
GO:0008360	regulation of cell shape	0.641602	-0.443787	1	114	5	0.00957854	522	10917	3.32844e+24	CG4629,RhoL,cno,Pvr,Arf79F
GO:0045467	R7 cell development	0.642953	-0.441683	1	21	1	0.00191571	522	10917	34636	Rab6
GO:0035148	tube formation	0.642953	-0.441683	1	21	1	0.00191571	522	10917	33903	mmy
GO:0051058	negative regulation of small GTPase mediated signal transduction	0.642953	-0.441683	1	21	1	0.00191571	522	10917	33139	S6kII
GO:0000723	telomere maintenance	0.642953	-0.441683	1	21	1	0.00191571	522	10917	33661	HP6
GO:0046580	negative regulation of Ras protein signal transduction	0.642953	-0.441683	1	21	1	0.00191571	522	10917	33139	S6kII
GO:0007614	short-term memory	0.642953	-0.441683	1	21	1	0.00191571	522	10917	31309	dnc
GO:0050905	neuromuscular process	0.642953	-0.441683	1	21	1	0.00191571	522	10917	43415	Doa
GO:0043094	cellular metabolic compound salvage	0.642953	-0.441683	1	21	1	0.00191571	522	10917	39976	Adgf-A
GO:0006874	cellular calcium ion homeostasis	0.642953	-0.441683	1	21	1	0.00191571	522	10917	40664	Itp-r83A
GO:0032200	telomere organization	0.642953	-0.441683	1	21	1	0.00191571	522	10917	33661	HP6
GO:0070983	dendrite guidance	0.642953	-0.441683	1	21	1	0.00191571	522	10917	47080	acj6
GO:0051017	actin filament bundle assembly	0.642953	-0.441683	1	21	1	0.00191571	522	10917	32718	f
GO:0006635	fatty acid beta-oxidation	0.642953	-0.441683	1	21	1	0.00191571	522	10917	38147	CG9149
GO:0003012	muscle system process	0.642953	-0.441683	1	21	1	0.00191571	522	10917	36071	KCNQ
GO:0040001	establishment of mitotic spindle localization	0.642953	-0.441683	1	21	1	0.00191571	522	10917	40620	cno
GO:1902589	single-organism organelle organization	0.644686	-0.438993	1	961	44	0.0842912	522	10917	37580,40620,38648,33661,32696,37663,41303,37808,34064,37849,39338,43415,37033,39203,32718,3772559,35927,42295,40848,39368,41884,36492,34524,3772382,37912,31613,34894,40133,34127,42596,35051,34636,41067,45329,326120,41427,31168,41225,34352,34678,36699,31239,40489,33245	RpS16,cno,scny,HP6,Arpc3B,CG3085,CG4565,fzr2,LKR,RpL39,RpL10Ab,Doa,fab1,E(z),f,Skeletor,Su(var)2-10,Ppcs,alphaTub84B,rols,CG6118,cbs,aub,cp309,Letm1,RpL17,yuri,ash1,Pvr,how,BicD,Rab6,skap,RpL12,HdacX,Sbf,moody,Mical,RpL7,CG5781,Arf51F,egh,mael,ds
GO:0016568	chromatin modification	0.645152	-0.438269	1	137	6	0.0114943	522	10917	3.2612e+30	HdacX,LKR,CG4565,ash1,scny,E(z)
GO:0008306	associative learning	0.647637	-0.434426	1	69	3	0.00574713	522	10917	331393225331309	S6kII,rad,dnc
GO:0070201	regulation of establishment of protein localization	0.647637	-0.434426	1	69	3	0.00574713	522	10917	321403313941177	p24-1,S6kII,eca
GO:0030029	actin filament-based process	0.650686	-0.429729	1	227	10	0.0191571	522	10917	4.14274e+49	Sbf,rols,Mical,moody,Arf51F,Arpc3B,Pvr,how,f,Ppcs
GO:0044271	cellular nitrogen compound biosynthetic process	0.652062	-0.427616	1	381	17	0.032567	522	10917	4.25214e+84	e,CG7368,EloA,ras,CG2246,Gyc-89Da,CG8417,CRMP,TfIIFalpha,Taf12L,Adgf-A,CG8080,bw,se,Prat2,pug,Ppcs
GO:0032787	monocarboxylic acid metabolic process	0.652124	-0.427521	1	138	6	0.0114943	522	10917	4.35824e+30	Tpi,CG9149,CG1516,CG10131,CG31523,PH4alphaEFB
GO:0048190	wing disc dorsal/ventral pattern formation	0.653072	-0.426067	1	46	2	0.00383142	522	10917	3291833434	Hs3st-B,Slh
GO:0010035	response to inorganic substance	0.653072	-0.426067	1	46	2	0.00383142	522	10917	4523444121	Ggamma30A,TotA
GO:0071214	cellular response to abiotic stimulus	0.653072	-0.426067	1	46	2	0.00383142	522	10917	3527544121	Victoria,TotA
GO:0008654	phospholipid biosynthetic process	0.653072	-0.426067	1	46	2	0.00383142	522	10917	11735336049	Cct1,CG2292
GO:0015711	organic anion transport	0.655797	-0.421905	1	93	4	0.00766284	522	10917	4.02544e+19	CG13248,CG8850,Ant2,colt
GO:0046942	carboxylic acid transport	0.657287	-0.419634	1	70	3	0.00574713	522	10917	402543633133470	CG13248,CG8850,colt
GO:0015849	organic acid transport	0.657287	-0.419634	1	70	3	0.00574713	522	10917	402543633133470	CG13248,CG8850,colt
GO:0048513	organ development	0.658104	-0.418392	1	1244	57	0.109195	522	10917	40620,42749,40527,40149,39704,41136,35110,36378,32918,32130,37619,43564,39564,36929,35773,43415,40835,40664,45318,32858,45248,42803,39203,32718,34024,35927,42295,117353,39707,43497,39368,30983,37949,43385,33434,39271,39935,34947,31003,39885,30998,34127,42596,34636,34906,42356,42770,41225,31168,40506,33139,31227,41177,36076,45574,40896,33245	cno,EloA,aux,verm,Eig71Ed,RhoL,amos,Cyp301a1,Hs3st-B,dy,stl,RpS28a,btl,CG30456,slv,Doa,Antp,Itp-r83A,kn,Cyp18a1,Nckx30C,Hmgcr,E(z),f,santa-maria,Su(var)2-10,Ppcs,Cct1,Eig71Ef,Obp99b,rols,l(1)sc,Mmp1,Hrb98DE,Slh,CG6175,tap,beat-Ia,vnd,sinah,svr,Pvr,how,Rab6,wor,bnl,Irk2,Mical,moody,Arf79F,S6kII,gt,eca,Hdc,ida,alpha-Est10,ds
GO:0030182	neuron differentiation	0.658305	-0.418087	1	751	34	0.0651341	522	10917	4.70803e+171	acj6,Dredd,aay,ras,amos,CG4842,dnc,Fur1,Doa,mmy,Oli,kn,exex,Nckx30C,f,E(z),Aats-gly,CG42732,daw,beat-Ia,Rab6,wor,Xe7,Pkc98E,Irk2,Glt,Mkk4,Mical,gt,lva,Hdc,egh,ds,wrapper
GO:0007485	imaginal disc-derived male genitalia development	0.660059	-0.415427	1	22	1	0.00191571	522	10917	34127	Pvr
GO:0042181	ketone biosynthetic process	0.660059	-0.415427	1	22	1	0.00191571	522	10917	2768685	mld
GO:0007632	visual behavior	0.660059	-0.415427	1	22	1	0.00191571	522	10917	40149	verm
GO:0090175	regulation of establishment of planar polarity	0.660059	-0.415427	1	22	1	0.00191571	522	10917	33245	ds
GO:0097190	apoptotic signaling pathway	0.660059	-0.415427	1	22	1	0.00191571	522	10917	31764	Corp
GO:0016360	sensory organ precursor cell fate determination	0.660059	-0.415427	1	22	1	0.00191571	522	10917	35110	amos
GO:0018345	protein palmitoylation	0.660059	-0.415427	1	22	1	0.00191571	522	10917	34503	Dnz1
GO:0031056	regulation of histone modification	0.660059	-0.415427	1	22	1	0.00191571	522	10917	34064	LKR
GO:0060582	cell fate determination involved in pattern specification	0.660059	-0.415427	1	22	1	0.00191571	522	10917	35110	amos
GO:2001020	regulation of response to DNA damage stimulus	0.660059	-0.415427	1	22	1	0.00191571	522	10917	33288	Pino
GO:0061572	actin filament bundle organization	0.660059	-0.415427	1	22	1	0.00191571	522	10917	32718	f
GO:0045433	male courtship behavior, veined wing generated song production	0.660059	-0.415427	1	22	1	0.00191571	522	10917	39085	aay
GO:0055074	calcium ion homeostasis	0.660059	-0.415427	1	22	1	0.00191571	522	10917	40664	Itp-r83A
GO:0009996	negative regulation of cell fate specification	0.660059	-0.415427	1	22	1	0.00191571	522	10917	33139	S6kII
GO:0035050	embryonic heart tube development	0.660059	-0.415427	1	22	1	0.00191571	522	10917	42803	Hmgcr
GO:0046660	female sex differentiation	0.660059	-0.415427	1	22	1	0.00191571	522	10917	37619	stl
GO:0010454	negative regulation of cell fate commitment	0.660059	-0.415427	1	22	1	0.00191571	522	10917	33139	S6kII
GO:0007051	spindle organization	0.660539	-0.414699	1	251	11	0.0210728	522	10917	4.53294e+56	RpL12,RpS16,alphaTub84B,RpL39,RpL10Ab,CG6118,RpL7,RpL17,Pvr,Skeletor,skap
GO:0007292	female gamete generation	0.660974	-0.414041	1	579	26	0.0498084	522	10917	1.17353e+130	Cct1,spin,rols,aub,Hrb98DE,orb,Cp38,ras,RhoL,ash1,Pvr,Rab6,BicD,dnc,stl,btl,Hrs,Doa,CG15571,otu,egh,Cp15,Cyp18a1,mael,Nup44A,Ppcs
GO:0044699	single-organism process	0.661684	-0.412968	1	6380	301	0.576628	522	10917	43582,38170,38648,39301,41835,39085,38255,41192,43018,41037,43415,40835,31365,34594,34966,45318,32858,37139,33908,42836,32799,34786,33230,3772382,37912,39150,33636,44632,39611,39700,5740325,36197,34894,36331,246552,39885,45234,40263,34636,38956,45329,43428,40675,40790,34581,36385,34352,31708,34134,39028,32318,40896,40489,3772432,42203,3355150,38735,35667,37883,47080,39709,32925,117365,31309,39564…	Tpi,robl62A,scny,CG7368,CG31344,aay,CG5687,CG8417,Clbn,CG8136,Doa,Antp,CG15571,Pde1c,Syx5,kn,Cyp18a1,CG5493,epsilonCOP,CG31140,Frq2,CAH1,rempA,cp309,Letm1,Ilp2,Atet,Cyp4e1,bmm,Eig71Ea,CG42732,CG9067,yuri,CG8850,CG30344,sinah,Ggamma30A,CG11796,Rab6,CG13667,RpL12,Pkc98E,CRMP,TfIIFalpha,spag4,CG17760,RpL7,CG10778,wol,Srp68,tth,alpha-Est10,mael,Adhr,PKD,AGO3,CG10144,kappaB-Ras,CG13575,acj6,Eig71Eh,CG…
GO:0048859	formation of anatomical boundary	0.664691	-0.408433	1	47	2	0.00383142	522	10917	3511033245	amos,ds
GO:0022414	reproductive process	0.665478	-0.40725	1	990	45	0.0862069	522	10917	45380,40527,31011,39085,36619,39151,43873,41136,39324,37619,31309,39564,33458,43415,31365,33672,34594,31789,34966,32858,42803,12798279,42295,32245,117353,39368,34524,39150,42752,43385,34894,31788,40133,34127,42596,35051,34636,34545,34581,36699,31239,38999,40489,32353,35762	spin,aux,Dredd,aay,tra2,Ilp3,ras,RhoL,Gr68a,stl,dnc,btl,Hrs,Doa,CG15571,Taf12L,Pde1c,otu,Syx5,Cyp18a1,Hmgcr,Acp98AB,Ppcs,fne,Cct1,rols,aub,Ilp2,orb,Hrb98DE,yuri,Cp38,ash1,Pvr,how,BicD,Rab6,Gr32a,spag4,Arf51F,egh,Cp15,mael,mamo,Nup44A
GO:0006468	protein phosphorylation	0.66566	-0.406977	1	252	11	0.0210728	522	10917	4.34284e+54	Pkc98E,btl,Mkk4,Doa,S6kII,aux,CG4629,yata,Pvr,PKD,CG10702
GO:0003008	system process	0.666863	-0.405171	1	559	25	0.0478927	522	10917	4.35824e+130	Tpi,Obp99b,rempA,cp309,acj6,dpr4,svr,Nha1,Gr68a,Gr32a,dnc,Pkc98E,KCNQ,CRMP,Doa,S6kII,Itp-r83A,Oct-TyrR,rad,bw,wry,Obp83ef,f,mld,dpr17
GO:0030154	cell differentiation	0.667601	-0.404065	1	2163	100	0.191571	522	10917	43582,40620,45380,41835,33661,39085,39704,41136,35110,33438,41037,43415,40835,31365,45318,35066,32858,34024,42836,39368,33636,37949,42752,5740325,37220,34894,36430,34947,40133,31003,39885,42596,34636,34906,43428,34193,41225,31168,39518,40790,31227,34581,39976,33470,36699,45574,38999,31239,40489,35762,40016,40761,34503,40527,47080,31011,43873,32918,39817,31309,37619,39564,33458,31204,47220,45783,3…	Tpi,cno,spin,CG31344,HP6,aay,Eig71Ed,RhoL,amos,Cyp309a1,CG8136,Doa,Antp,CG15571,kn,Oli,Cyp18a1,santa-maria,CG31140,rols,Atet,Mmp1,orb,CG42732,CG9975,yuri,CG13321,beat-Ia,ash1,vnd,sinah,how,Rab6,wor,Pkc98E,Glt,Mical,moody,stv,TfIIFalpha,gt,spag4,Adgf-A,colt,Arf51F,ida,Cp15,egh,mael,Nup44A,skl,Osi7,Dnz1,aux,acj6,Dredd,ras,Hs3st-B,CG4842,dnc,stl,btl,Hrs,pcx,Fur1,Aats-val,mmy,otu,exex,Nckx30C,CG9518,…
GO:0022604	regulation of cell morphogenesis	0.668187	-0.403187	1	163	7	0.01341	522	10917	3.32844e+34	CG4629,btl,RhoL,cno,Pvr,Arf79F,lva
GO:0035295	tube development	0.668586	-0.40259	1	208	9	0.0172414	522	10917	4.23564e+44	bnl,btl,rols,l(1)sc,Hmgcr,Antp,Pvr,mmy,ect
GO:0007281	germ cell development	0.67208	-0.397378	1	669	30	0.0574713	522	10917	1.17353e+150	Cct1,spin,rols,aub,aux,Hrb98DE,orb,Dredd,yuri,Cp38,ras,RhoL,ash1,Pvr,BicD,Rab6,stl,dnc,btl,Hrs,Doa,CG15571,otu,spag4,Cp15,egh,Cyp18a1,mael,Nup44A,Ppcs
GO:0006959	humoral immune response	0.672216	-0.397176	1	95	4	0.00766284	522	10917	4.08484e+19	alphaTub84B,Hel89B,LysP,Pvr
GO:0032502	developmental process	0.673035	-0.395959	1	3223	150	0.287356	522	10917	43582,45380,41835,45883,33661,39085,41136,35110,41037,43415,40835,40664,31365,45318,34966,32858,42836,39368,33230,3772382,33636,37912,39150,39611,39700,5740325,34894,36430,31003,39885,34636,43428,34193,40790,31227,34581,39976,34352,33470,34134,36699,38999,31239,40489,40896,38636,35762,40150,40527,47080,31011,39709,40149,43873,39817,44135,31309,39564,33458,47220,31204,31789,32416,32140,33862,40094…	Tpi,spin,CG31344,kar,HP6,aay,RhoL,amos,CG8136,Doa,Antp,Itp-r83A,CG15571,kn,Syx5,Cyp18a1,CG31140,rols,rempA,cp309,Atet,Letm1,Ilp2,bmm,Eig71Ea,CG42732,yuri,CG13321,vnd,sinah,Rab6,Pkc98E,Glt,TfIIFalpha,gt,spag4,Adgf-A,RpL7,colt,wol,Arf51F,Cp15,egh,mael,alpha-Est10,mthl2,Nup44A,serp,aux,acj6,Dredd,Eig71Eh,verm,ras,CG4842,ect,dnc,btl,Hrs,Fur1,pcx,otu,CG9518,p24-1,CG9175,Bet1,yellow-k,Su(var)2-10,Sesn,…
GO:0045935	positive regulation of nucleobase-containing compound metabolic process	0.673796	-0.394828	1	298	13	0.0249042	522	10917	4.14273e+66	Sbf,tomb,TfIIFalpha,l(1)sc,Antp,aub,EloA,otu,acj6,ash1,vnd,AGO3,wor
GO:0022603	regulation of anatomical structure morphogenesis	0.675768	-0.391905	1	254	11	0.0210728	522	10917	3.95644e+54	btl,sals,cno,Arf79F,S6kII,lva,CG4629,RhoL,ds,sinah,Pvr
GO:0051241	negative regulation of multicellular organismal process	0.675994	-0.391571	1	48	2	0.00383142	522	10917	3122733139	gt,S6kII
GO:0035317	imaginal disc-derived wing hair organization	0.675994	-0.391571	1	48	2	0.00383142	522	10917	3271833245	f,ds
GO:0030718	germ-line stem cell maintenance	0.675994	-0.391571	1	48	2	0.00383142	522	10917	4259643385	how,Hrb98DE
GO:0071826	ribonucleoprotein complex subunit organization	0.675994	-0.391571	1	48	2	0.00383142	522	10917	3661934524	tra2,aub
GO:0008587	imaginal disc-derived wing margin morphogenesis	0.675994	-0.391571	1	48	2	0.00383142	522	10917	3291842596	Hs3st-B,how
GO:0045995	regulation of embryonic development	0.676014	-0.391542	1	72	3	0.00574713	522	10917	406204048934524	cno,mael,aub
GO:0035222	wing disc pattern formation	0.676014	-0.391542	1	72	3	0.00574713	522	10917	329183324533434	Hs3st-B,ds,Slh
GO:0043269	regulation of ion transport	0.676346	-0.391051	1	23	1	0.00191571	522	10917	36589	Ih
GO:0016339	calcium-dependent cell-cell adhesion	0.676346	-0.391051	1	23	1	0.00191571	522	10917	33245	ds
GO:0043409	negative regulation of MAPK cascade	0.676346	-0.391051	1	23	1	0.00191571	522	10917	4379907	Mkp
GO:0016545	male courtship behavior, veined wing vibration	0.676346	-0.391051	1	23	1	0.00191571	522	10917	39085	aay
GO:0016081	synaptic vesicle docking involved in exocytosis	0.676346	-0.391051	1	23	1	0.00191571	522	10917	34966	Syx5
GO:0010171	body morphogenesis	0.676346	-0.391051	1	23	1	0.00191571	522	10917	318094	TwdlX
GO:0007179	transforming growth factor beta receptor signaling pathway	0.676346	-0.391051	1	23	1	0.00191571	522	10917	33474	daw
GO:0007398	ectoderm development	0.676346	-0.391051	1	23	1	0.00191571	522	10917	31003	vnd
GO:0035265	organ growth	0.676346	-0.391051	1	23	1	0.00191571	522	10917	35927	Su(var)2-10
GO:0060429	epithelium development	0.679989	-0.385678	1	541	24	0.045977	522	10917	1.17353e+120	Cct1,cno,rols,l(1)sc,aub,Cp38,RhoL,Pvr,stl,bnl,Hrs,btl,CG15571,mmy,colt,egh,Cp15,Myo10A,Cyp18a1,Hmgcr,mael,f,ds,Ppcs
GO:0072001	renal system development	0.68509	-0.378205	1	73	3	0.00574713	522	10917	393683098334127	rols,l(1)sc,Pvr
GO:0007528	neuromuscular junction development	0.68509	-0.378205	1	73	3	0.00574713	522	10917	327993313932797	Frq2,S6kII,Frq1
GO:0043087	regulation of GTPase activity	0.68509	-0.378205	1	73	3	0.00574713	522	10917	419603225342869	CG5916,rad,CG6182
GO:0033124	regulation of GTP catabolic process	0.68509	-0.378205	1	73	3	0.00574713	522	10917	419603225342869	CG5916,rad,CG6182
GO:0001655	urogenital system development	0.68509	-0.378205	1	73	3	0.00574713	522	10917	393683098334127	rols,l(1)sc,Pvr
GO:0048863	stem cell differentiation	0.68591	-0.377009	1	120	5	0.00957854	522	10917	3.10033e+24	vnd,l(1)sc,how,Antp,Hrb98DE
GO:0006865	amino acid transport	0.686986	-0.375441	1	49	2	0.00383142	522	10917	4025436331	CG13248,CG8850
GO:0031047	gene silencing by RNA	0.686986	-0.375441	1	49	2	0.00383142	522	10917	345243355150	aub,AGO3
GO:0035315	hair cell differentiation	0.686986	-0.375441	1	49	2	0.00383142	522	10917	3271833245	f,ds
GO:0035316	non-sensory hair organization	0.686986	-0.375441	1	49	2	0.00383142	522	10917	3271833245	f,ds
GO:0007178	transmembrane receptor protein serine/threonine kinase signaling pathway	0.686986	-0.375441	1	49	2	0.00383142	522	10917	3347435762	daw,Nup44A
GO:0007076	mitotic chromosome condensation	0.691854	-0.36838	1	24	1	0.00191571	522	10917	34524	aub
GO:0007484	imaginal disc-derived genitalia development	0.691854	-0.36838	1	24	1	0.00191571	522	10917	34127	Pvr
GO:0018208	peptidyl-proline modification	0.691854	-0.36838	1	24	1	0.00191571	522	10917	43620	PH4alphaEFB
GO:0016334	establishment or maintenance of polarity of follicular epithelium	0.691854	-0.36838	1	24	1	0.00191571	522	10917	31239	egh
GO:0006661	phosphatidylinositol biosynthetic process	0.691854	-0.36838	1	24	1	0.00191571	522	10917	36049	CG2292
GO:0003382	epithelial cell morphogenesis	0.691854	-0.36838	1	24	1	0.00191571	522	10917	33470	colt
GO:0072527	pyrimidine-containing compound metabolic process	0.691854	-0.36838	1	24	1	0.00191571	522	10917	40675	CRMP
GO:0048065	male courtship behavior, veined wing extension	0.691854	-0.36838	1	24	1	0.00191571	522	10917	39085	aay
GO:0006505	GPI anchor metabolic process	0.691854	-0.36838	1	24	1	0.00191571	522	10917	36049	CG2292
GO:0007338	single fertilization	0.691854	-0.36838	1	24	1	0.00191571	522	10917	32353	mamo
GO:0010038	response to metal ion	0.691854	-0.36838	1	24	1	0.00191571	522	10917	44121	TotA
GO:0019439	aromatic compound catabolic process	0.692158	-0.36794	1	144	6	0.0114943	522	10917	4.08484e+32	alphaTub84B,kappaB-Ras,Rgk1,Gyc-89Da,CG17760,Adgf-A
GO:0061024	membrane organization	0.69265	-0.367231	1	167	7	0.01341	522	10917	3.41344e+34	wol,Srp68,fab1,CG10420,rb,Clc,pall
GO:0043085	positive regulation of catalytic activity	0.695817	-0.362669	1	98	4	0.00766284	522	10917	4.23564e+19	bnl,btl,Mkk4,rad
GO:0048619	embryonic hindgut morphogenesis	0.69767	-0.36001	1	50	2	0.00383142	522	10917	3098334127	l(1)sc,Pvr
GO:0070646	protein modification by small protein removal	0.69767	-0.36001	1	50	2	0.00383142	522	10917	3864831789	scny,otu
GO:0043062	extracellular structure organization	0.69767	-0.36001	1	50	2	0.00383142	522	10917	3390337949	mmy,Mmp1
GO:0045596	negative regulation of cell differentiation	0.699829	-0.356919	1	122	5	0.00957854	522	10917	3.95643e+24	btl,Hs3st-B,how,S6kII,Hrb98DE
GO:0036211	protein modification process	0.702539	-0.353055	1	831	37	0.0708812	522	10917	3.49584e+191	CG17329,scny,Dnz1,aux,CG4565,CG16781,CG10702,LKR,btl,Doa,otu,CG8974,E(z),alpha-Man-I,CG4629,yata,ash1,sinah,Pvr,Pp1-Y2,HdacX,Pkc98E,CG32812,Mkk4,stv,S6kII,Arf79F,CG2292,wol,Arf51F,Mkp,CG32152,ds,PH4alphaEFB,PKD,cdc14,Ubi-p5E
GO:0006464	cellular protein modification process	0.702539	-0.353055	1	831	37	0.0708812	522	10917	3.49584e+191	CG17329,scny,Dnz1,aux,CG4565,CG16781,CG10702,LKR,btl,Doa,otu,CG8974,E(z),alpha-Man-I,CG4629,yata,ash1,sinah,Pvr,Pp1-Y2,HdacX,Pkc98E,CG32812,Mkk4,stv,S6kII,Arf79F,CG2292,wol,Arf51F,Mkp,CG32152,ds,PH4alphaEFB,PKD,cdc14,Ubi-p5E
GO:0044282	small molecule catabolic process	0.70267	-0.352868	1	75	3	0.00574713	522	10917	381473285832625	CG9149,Cyp18a1,P5CDh2
GO:0030811	regulation of nucleotide catabolic process	0.70267	-0.352868	1	75	3	0.00574713	522	10917	419603225342869	CG5916,rad,CG6182
GO:0033121	regulation of purine nucleotide catabolic process	0.70267	-0.352868	1	75	3	0.00574713	522	10917	419603225342869	CG5916,rad,CG6182
GO:0009118	regulation of nucleoside metabolic process	0.70267	-0.352868	1	75	3	0.00574713	522	10917	419603225342869	CG5916,rad,CG6182
GO:0005975	carbohydrate metabolic process	0.702793	-0.352693	1	282	12	0.0229885	522	10917	3.80764e+59	Gale,serp,Tpi,CG33080,Arf79F,alpha-Man-I,verm,wol,Arf51F,ATPCL,CG1516,CG8417
GO:0006644	phospholipid metabolic process	0.703408	-0.351817	1	99	4	0.00766284	522	10917	1.17353e+20	Cct1,fab1,CG7789,CG2292
GO:0007098	centrosome cycle	0.703408	-0.351817	1	99	4	0.00766284	522	10917	3.93384e+19	RpL10Ab,cbs,RpL7,RpL17
GO:0009952	anterior/posterior pattern specification	0.704436	-0.350358	1	169	7	0.01341	522	10917	3.12274e+34	gt,mael,aub,Antp,BicD,Rab6,orb
GO:0007009	plasma membrane organization	0.706621	-0.347261	1	25	1	0.00191571	522	10917	34134	wol
GO:0071559	response to transforming growth factor beta	0.706621	-0.347261	1	25	1	0.00191571	522	10917	33474	daw
GO:0051653	spindle localization	0.706621	-0.347261	1	25	1	0.00191571	522	10917	40620	cno
GO:0008052	sensory organ boundary specification	0.706621	-0.347261	1	25	1	0.00191571	522	10917	35110	amos
GO:0007280	pole cell migration	0.706621	-0.347261	1	25	1	0.00191571	522	10917	42803	Hmgcr
GO:0007469	antennal development	0.706621	-0.347261	1	25	1	0.00191571	522	10917	32718	f
GO:0006406	mRNA export from nucleus	0.706621	-0.347261	1	25	1	0.00191571	522	10917	317878	Nxf3
GO:0071560	cellular response to transforming growth factor beta stimulus	0.706621	-0.347261	1	25	1	0.00191571	522	10917	33474	daw
GO:0006096	glycolytic process	0.706621	-0.347261	1	25	1	0.00191571	522	10917	43582	Tpi
GO:0000302	response to reactive oxygen species	0.706621	-0.347261	1	25	1	0.00191571	522	10917	42001	Gyc-89Da
GO:0030177	positive regulation of Wnt signaling pathway	0.706621	-0.347261	1	25	1	0.00191571	522	10917	41177	eca
GO:0009566	fertilization	0.706621	-0.347261	1	25	1	0.00191571	522	10917	32353	mamo
GO:0051293	establishment of spindle localization	0.706621	-0.347261	1	25	1	0.00191571	522	10917	40620	cno
GO:0048542	lymph gland development	0.706621	-0.347261	1	25	1	0.00191571	522	10917	40835	Antp
GO:0033157	regulation of intracellular protein transport	0.70805	-0.345241	1	51	2	0.00383142	522	10917	3313941177	S6kII,eca
GO:0051651	maintenance of location in cell	0.70805	-0.345241	1	51	2	0.00383142	522	10917	3452434427	aub,KdelR
GO:0006342	chromatin silencing	0.70805	-0.345241	1	51	2	0.00383142	522	10917	3920334524	E(z),aub
GO:0009913	epidermal cell differentiation	0.70805	-0.345241	1	51	2	0.00383142	522	10917	3271833245	f,ds
GO:0001709	cell fate determination	0.710994	-0.341091	1	147	6	0.0114943	522	10917	3.51103e+29	amos,vnd,l(1)sc,how,BicD,orb
GO:0050909	sensory perception of taste	0.711175	-0.340836	1	76	3	0.00574713	522	10917	406643932434545	Itp-r83A,Gr68a,Gr32a
GO:0051254	positive regulation of RNA metabolic process	0.716316	-0.333634	1	285	12	0.0229885	522	10917	4.14273e+61	Sbf,tomb,TfIIFalpha,l(1)sc,Antp,aub,EloA,acj6,ash1,vnd,AGO3,wor
GO:0009994	oocyte differentiation	0.717095	-0.332547	1	148	6	0.0114943	522	10917	3.12394e+29	egh,mael,aub,BicD,Rab6,orb
GO:0045814	negative regulation of gene expression, epigenetic	0.718131	-0.331104	1	52	2	0.00383142	522	10917	3920334524	E(z),aub
GO:0001666	response to hypoxia	0.718131	-0.331104	1	52	2	0.00383142	522	10917	4200137912	Gyc-89Da,Letm1
GO:0022416	chaeta development	0.718179	-0.331036	1	101	4	0.00766284	522	10917	4.34153e+19	Doa,f,Hs3st-B,Ppcs
GO:0001708	cell fate specification	0.719493	-0.329209	1	77	3	0.00574713	522	10917	395644083545318	btl,Antp,kn
GO:0007629	flight behavior	0.720681	-0.327559	1	26	1	0.00191571	522	10917	40664	Itp-r83A
GO:0035285	appendage segmentation	0.720681	-0.327559	1	26	1	0.00191571	522	10917	32918	Hs3st-B
GO:0033227	dsRNA transport	0.720681	-0.327559	1	26	1	0.00191571	522	10917	31239	egh
GO:0036011	imaginal disc-derived leg segmentation	0.720681	-0.327559	1	26	1	0.00191571	522	10917	32918	Hs3st-B
GO:0046661	male sex differentiation	0.720681	-0.327559	1	26	1	0.00191571	522	10917	34127	Pvr
GO:0048814	regulation of dendrite morphogenesis	0.720681	-0.327559	1	26	1	0.00191571	522	10917	31350	lva
GO:0019236	response to pheromone	0.720681	-0.327559	1	26	1	0.00191571	522	10917	43497	Obp99b
GO:0019395	fatty acid oxidation	0.720681	-0.327559	1	26	1	0.00191571	522	10917	38147	CG9149
GO:0000279	M phase	0.720681	-0.327559	1	26	1	0.00191571	522	10917	45574	ida
GO:0007112	male meiosis cytokinesis	0.720681	-0.327559	1	26	1	0.00191571	522	10917	36699	Arf51F
GO:0009886	post-embryonic morphogenesis	0.723529	-0.323614	1	554	24	0.045977	522	10917	1.17353e+120	Cct1,Obp99b,Eig71Ef,spin,EloA,Mmp1,CG6175,Eig71Ed,Cyp301a1,svr,Hs3st-B,dy,Pvr,how,CG30456,Doa,S6kII,kn,Cyp18a1,f,ds,alpha-Est10,santa-maria,Ppcs
GO:0003002	regionalization	0.725081	-0.321472	1	466	20	0.0383142	522	10917	3.45244e+99	aub,EloA,orb,Slh,amos,vnd,Hs3st-B,BicD,Rab6,Pkc98E,Doa,gt,Antp,S6kII,eca,kn,wol,f,ds,mael
GO:0035218	leg disc development	0.725359	-0.321089	1	102	4	0.00766284	522	10917	3.69293e+19	CG30456,Cyp18a1,Hs3st-B,ds
GO:0006820	anion transport	0.726371	-0.319694	1	126	5	0.00957854	522	10917	4.35614e+24	CG7912,CG13248,CG8850,Ant2,colt
GO:0035239	tube morphogenesis	0.726371	-0.319694	1	126	5	0.00957854	522	10917	4.23564e+24	bnl,btl,l(1)sc,Pvr,mmy
GO:0050877	neurological system process	0.72738	-0.318306	1	511	22	0.0421456	522	10917	4.35824e+115	Tpi,Obp99b,rempA,cp309,acj6,dpr4,svr,Gr68a,Gr32a,dnc,Pkc98E,CRMP,Doa,S6kII,Itp-r83A,Oct-TyrR,rad,bw,Obp83ef,f,mld,dpr17
GO:0009888	tissue development	0.727756	-0.31779	1	753	33	0.0632184	522	10917	1.17353e+165	Cct1,Eig71Ef,cno,Obp99b,rols,l(1)sc,aub,Mmp1,Cp38,Eig71Ed,RhoL,vnd,how,Pvr,stl,bnl,btl,Hrs,Doa,moody,CG15571,mmy,colt,egh,Cp15,Myo10A,Cyp18a1,Hmgcr,mael,ds,f,santa-maria,Ppcs
GO:0032970	regulation of actin filament-based process	0.727917	-0.317568	1	53	2	0.00383142	522	10917	3269641377	Arpc3B,sals
GO:0032956	regulation of actin cytoskeleton organization	0.727917	-0.317568	1	53	2	0.00383142	522	10917	3269641377	Arpc3B,sals
GO:0006790	sulfur compound metabolic process	0.732402	-0.311426	1	103	4	0.00766284	522	10917	3.67604e+19	ATPCL,Mical,se,CG5493
GO:0051297	centrosome organization	0.732737	-0.310969	1	127	5	0.00957854	522	10917	3.93384e+26	RpL10Ab,cp309,cbs,RpL7,RpL17
GO:0044248	cellular catabolic process	0.733949	-0.309316	1	513	22	0.0421456	522	10917	4.08484e+113	alphaTub84B,kappaB-Ras,scny,P5CDh2,bmm,jet,fzr2,sinah,Gyc-89Da,pall,CG9149,CRMP,Rgk1,Adgf-A,CG17760,LysP,Cyp18a1,CG4661,fab1,Atg8b,Ubi-p5E,Sesn
GO:0007362	terminal region determination	0.734069	-0.309153	1	27	1	0.00191571	522	10917	31227	gt
GO:0034599	cellular response to oxidative stress	0.734069	-0.309153	1	27	1	0.00191571	522	10917	44121	TotA
GO:0071456	cellular response to hypoxia	0.734069	-0.309153	1	27	1	0.00191571	522	10917	37912	Letm1
GO:0042332	gravitaxis	0.734069	-0.309153	1	27	1	0.00191571	522	10917	34894	yuri
GO:0031346	positive regulation of cell projection organization	0.734069	-0.309153	1	27	1	0.00191571	522	10917	31350	lva
GO:0035017	cuticle pattern formation	0.734069	-0.309153	1	27	1	0.00191571	522	10917	32718	f
GO:0009247	glycolipid biosynthetic process	0.734069	-0.309153	1	27	1	0.00191571	522	10917	36049	CG2292
GO:0009629	response to gravity	0.734069	-0.309153	1	27	1	0.00191571	522	10917	34894	yuri
GO:0045824	negative regulation of innate immune response	0.734069	-0.309153	1	27	1	0.00191571	522	10917	38648	scny
GO:0044848	biological phase	0.734069	-0.309153	1	27	1	0.00191571	522	10917	45574	ida
GO:0016322	neuron remodeling	0.734069	-0.309153	1	27	1	0.00191571	522	10917	41225	Mical
GO:0034440	lipid oxidation	0.734069	-0.309153	1	27	1	0.00191571	522	10917	38147	CG9149
GO:0022403	cell cycle phase	0.734069	-0.309153	1	27	1	0.00191571	522	10917	45574	ida
GO:0007612	learning	0.735567	-0.307113	1	79	3	0.00574713	522	10917	331393225331309	S6kII,rad,dnc
GO:0006631	fatty acid metabolic process	0.735567	-0.307113	1	79	3	0.00574713	522	10917	3814736624326140	CG9149,CG10131,CG31523
GO:0007450	dorsal/ventral pattern formation, imaginal disc	0.737415	-0.304605	1	54	2	0.00383142	522	10917	3291833434	Hs3st-B,Slh
GO:0032101	regulation of response to external stimulus	0.739309	-0.30204	1	104	4	0.00766284	522	10917	3.67694e+19	casp,Hel89B,Dredd,CG10157
GO:0007548	sex differentiation	0.739309	-0.30204	1	104	4	0.00766284	522	10917	4.34154e+19	Doa,Hmgcr,Pvr,stl
GO:0022412	cellular process involved in reproduction in multicellular organism	0.741234	-0.299438	1	736	32	0.0613027	522	10917	4.53804e+160	spin,aux,Dredd,ras,RhoL,dnc,stl,btl,Hrs,Doa,CG15571,otu,Cyp18a1,Hmgcr,Ppcs,Cct1,rols,aub,orb,Hrb98DE,Cp38,yuri,ash1,Pvr,how,BicD,Rab6,spag4,Cp15,egh,mael,Nup44A
GO:0016042	lipid catabolic process	0.743328	-0.296618	1	80	3	0.00574713	522	10917	381473285839611	CG9149,Cyp18a1,bmm
GO:0016310	phosphorylation	0.744128	-0.295543	1	382	16	0.0306513	522	10917	4.06204e+79	cno,aux,CG4629,Sk1,yata,Pvr,CG10702,Pkc98E,btl,Mkk4,Doa,S6kII,fab1,CG7789,PKD,CG31140
GO:0007286	spermatid development	0.74608	-0.292923	1	105	4	0.00766284	522	10917	3.48944e+19	yuri,aux,spag4,Dredd
GO:0006997	nucleus organization	0.746628	-0.292188	1	55	2	0.00383142	522	10917	377255932353	Skeletor,mamo
GO:0002252	immune effector process	0.746628	-0.292188	1	55	2	0.00383142	522	10917	4113631957	RhoL,alpha-Man-I
GO:0045448	mitotic cell cycle, embryonic	0.746816	-0.291937	1	28	1	0.00191571	522	10917	39203	E(z)
GO:0009190	cyclic nucleotide biosynthetic process	0.746816	-0.291937	1	28	1	0.00191571	522	10917	42001	Gyc-89Da
GO:0030307	positive regulation of cell growth	0.746816	-0.291937	1	28	1	0.00191571	522	10917	39150	Ilp2
GO:0032320	positive regulation of Ras GTPase activity	0.746816	-0.291937	1	28	1	0.00191571	522	10917	32253	rad
GO:0006665	sphingolipid metabolic process	0.746816	-0.291937	1	28	1	0.00191571	522	10917	32089	Sk1
GO:0007277	pole cell development	0.746816	-0.291937	1	28	1	0.00191571	522	10917	34524	aub
GO:0044267	cellular protein metabolic process	0.747223	-0.291392	1	1391	62	0.118774	522	10917	37580,41343,34958,38648,34503,40527,33705,32635,41303,37808,117365,31315,35181,43564,34064,39564,37849,39338,43415,45783,31789,32238,37033,32532,39203,34024,37337,39644,31957,31613,33284,3355041,39829,43508,40133,34127,39885,3355173,31381,39104,45329,43428,42852,326120,31074,41020,39518,36049,33139,40506,34352,34134,36699,4379907,317885,33245,42203,36570,43620,39121,34067,326237	RpS16,RpS25,CG17329,scny,Dnz1,aux,jet,RpS19a,CG4565,fzr2,HBS1,CG16781,CG10702,RpS28a,LKR,btl,RpL39,RpL10Ab,Doa,Aats-val,otu,CG4661,fab1,CG8974,E(z),santa-maria,CG11110,Aats-gly,alpha-Man-I,RpL17,CG4629,eIF-4B,Aats-tyr,yata,ash1,Pvr,sinah,Pp1-Y2,rb,pall,RpL12,Pkc98E,Hsp68,HdacX,CG32812,Mkk4,stv,CG2292,S6kII,Arf79F,RpL7,wol,Arf51F,Mkp,CG32152,ds,PKD,mRpS16,PH4alphaEFB,CG8336,cdc14,Ubi-p5E
GO:0042051	compound eye photoreceptor development	0.750906	-0.286475	1	81	3	0.00574713	522	10917	434153463636076	Doa,Rab6,Hdc
GO:0045664	regulation of neuron differentiation	0.752716	-0.284067	1	106	4	0.00766284	522	10917	3.95643e+19	btl,S6kII,sinah,lva
GO:0042384	cilium assembly	0.755563	-0.280292	1	56	2	0.00383142	522	10917	3323041739	rempA,CG3259
GO:0006814	sodium ion transport	0.755563	-0.280292	1	56	2	0.00383142	522	10917	4524833961	Nckx30C,Nha1
GO:0006643	membrane lipid metabolic process	0.755563	-0.280292	1	56	2	0.00383142	522	10917	3208936049	Sk1,CG2292
GO:0006518	peptide metabolic process	0.755563	-0.280292	1	56	2	0.00383142	522	10917	4252138973	e,se
GO:0009798	axis specification	0.756378	-0.279214	1	202	8	0.0153257	522	10917	4.34283e+39	Pkc98E,gt,aub,Antp,orb,mael,Rab6,BicD
GO:0048707	instar larval or pupal morphogenesis	0.758297	-0.27668	1	543	23	0.0440613	522	10917	1.17353e+115	Cct1,Obp99b,Eig71Ef,EloA,Mmp1,CG6175,Eig71Ed,Cyp301a1,svr,Hs3st-B,dy,Pvr,how,CG30456,Doa,S6kII,kn,Cyp18a1,f,ds,alpha-Est10,santa-maria,Ppcs
GO:0042462	eye photoreceptor cell development	0.758304	-0.276671	1	82	3	0.00574713	522	10917	434153463636076	Doa,Rab6,Hdc
GO:0051302	regulation of cell division	0.758304	-0.276671	1	82	3	0.00574713	522	10917	455744084834067	ida,alphaTub84B,cdc14
GO:1990138	neuron projection extension	0.758953	-0.275815	1	29	1	0.00191571	522	10917	31309	dnc
GO:0042176	regulation of protein catabolic process	0.758953	-0.275815	1	29	1	0.00191571	522	10917	35927	Su(var)2-10
GO:1903308	regulation of chromatin modification	0.758953	-0.275815	1	29	1	0.00191571	522	10917	34064	LKR
GO:0009062	fatty acid catabolic process	0.758953	-0.275815	1	29	1	0.00191571	522	10917	38147	CG9149
GO:0050769	positive regulation of neurogenesis	0.758953	-0.275815	1	29	1	0.00191571	522	10917	31350	lva
GO:0001737	establishment of imaginal disc-derived wing hair orientation	0.758953	-0.275815	1	29	1	0.00191571	522	10917	33245	ds
GO:0030203	glycosaminoglycan metabolic process	0.758953	-0.275815	1	29	1	0.00191571	522	10917	39869	PGRP-SB2
GO:0048675	axon extension	0.758953	-0.275815	1	29	1	0.00191571	522	10917	31309	dnc
GO:0036294	cellular response to decreased oxygen levels	0.758953	-0.275815	1	29	1	0.00191571	522	10917	37912	Letm1
GO:0042551	neuron maturation	0.758953	-0.275815	1	29	1	0.00191571	522	10917	41225	Mical
GO:0071453	cellular response to oxygen levels	0.758953	-0.275815	1	29	1	0.00191571	522	10917	37912	Letm1
GO:0090316	positive regulation of intracellular protein transport	0.758953	-0.275815	1	29	1	0.00191571	522	10917	41177	eca
GO:0043648	dicarboxylic acid metabolic process	0.758953	-0.275815	1	29	1	0.00191571	522	10917	32625	P5CDh2
GO:0045197	establishment or maintenance of epithelial cell apical/basal polarity	0.758953	-0.275815	1	29	1	0.00191571	522	10917	33245	ds
GO:0070482	response to oxygen levels	0.764225	-0.268893	1	57	2	0.00383142	522	10917	4200137912	Gyc-89Da,Letm1
GO:0036293	response to decreased oxygen levels	0.764225	-0.268893	1	57	2	0.00383142	522	10917	4200137912	Gyc-89Da,Letm1
GO:0045926	negative regulation of growth	0.765524	-0.267195	1	83	3	0.00574713	522	10917	395643122737755	btl,gt,Sesn
GO:0006575	cellular modified amino acid metabolic process	0.765524	-0.267195	1	83	3	0.00574713	522	10917	389734127943620	se,pug,PH4alphaEFB
GO:1901606	alpha-amino acid catabolic process	0.770509	-0.260703	1	30	1	0.00191571	522	10917	32625	P5CDh2
GO:0035011	melanotic encapsulation of foreign target	0.770509	-0.260703	1	30	1	0.00191571	522	10917	41136	RhoL
GO:0030155	regulation of cell adhesion	0.770509	-0.260703	1	30	1	0.00191571	522	10917	41136	RhoL
GO:0051298	centrosome duplication	0.772568	-0.258036	1	84	3	0.00574713	522	10917	393383435231613	RpL10Ab,RpL7,RpL17
GO:0048754	branching morphogenesis of an epithelial tube	0.772619	-0.257969	1	58	2	0.00383142	522	10917	4235639564	bnl,btl
GO:0061138	morphogenesis of a branching epithelium	0.772619	-0.257969	1	58	2	0.00383142	522	10917	4235639564	bnl,btl
GO:0044782	cilium organization	0.772619	-0.257969	1	58	2	0.00383142	522	10917	3323041739	rempA,CG3259
GO:0060446	branching involved in open tracheal system development	0.772619	-0.257969	1	58	2	0.00383142	522	10917	4235639564	bnl,btl
GO:0008045	motor neuron axon guidance	0.772619	-0.257969	1	58	2	0.00383142	522	10917	3419335066	Glt,Oli
GO:0060271	cilium morphogenesis	0.772619	-0.257969	1	58	2	0.00383142	522	10917	3323041739	rempA,CG3259
GO:0008285	negative regulation of cell proliferation	0.772619	-0.257969	1	58	2	0.00383142	522	10917	4342843415	Pkc98E,Doa
GO:0043412	macromolecule modification	0.774266	-0.255839	1	881	38	0.0727969	522	10917	3.49584e+196	CG17329,scny,Dnz1,aux,CG4565,CG16781,CG10702,LKR,btl,Doa,otu,CG8974,E(z),alpha-Man-I,CG4629,l(2)35Bc,yata,ash1,sinah,Pvr,Pp1-Y2,HdacX,Pkc98E,CG32812,Mkk4,stv,S6kII,Arf79F,CG2292,wol,Arf51F,Mkp,CG32152,ds,PH4alphaEFB,PKD,cdc14,Ubi-p5E
GO:0044702	single organism reproductive process	0.778955	-0.249802	1	861	37	0.0708812	522	10917	4.53804e+185	spin,aux,Dredd,tra2,ras,RhoL,dnc,stl,btl,Hrs,Doa,CG15571,Taf12L,otu,Syx5,Cyp18a1,Hmgcr,Ppcs,Cct1,rols,aub,orb,Hrb98DE,yuri,Cp38,ash1,Pvr,how,BicD,Rab6,spag4,Arf51F,egh,Cp15,mael,mamo,Nup44A
GO:0002165	instar larval or pupal development	0.780372	-0.247985	1	640	27	0.0517241	522	10917	1.17353e+137	Cct1,Eig71Ef,Obp99b,spin,EloA,Mmp1,CG6175,Eig71Ed,Cyp301a1,dy,Hs3st-B,how,Pvr,svr,CG30456,Doa,S6kII,RpL7,kn,Cyp18a1,f,CG9518,alpha-Est10,ds,mld,santa-maria,Ppcs
GO:0016079	synaptic vesicle exocytosis	0.780752	-0.247498	1	59	2	0.00383142	522	10917	3345834966	Hrs,Syx5
GO:0008355	olfactory learning	0.780752	-0.247498	1	59	2	0.00383142	522	10917	3225331309	rad,dnc
GO:0061525	hindgut development	0.780752	-0.247498	1	59	2	0.00383142	522	10917	3098334127	l(1)sc,Pvr
GO:0007442	hindgut morphogenesis	0.780752	-0.247498	1	59	2	0.00383142	522	10917	3098334127	l(1)sc,Pvr
GO:0008406	gonad development	0.780752	-0.247498	1	59	2	0.00383142	522	10917	4280337619	Hmgcr,stl
GO:0045137	development of primary sexual characteristics	0.780752	-0.247498	1	59	2	0.00383142	522	10917	4280337619	Hmgcr,stl
GO:0043279	response to alkaloid	0.781513	-0.246524	1	31	1	0.00191571	522	10917	31168	moody
GO:0016476	regulation of embryonic cell shape	0.781513	-0.246524	1	31	1	0.00191571	522	10917	40620	cno
GO:0072329	monocarboxylic acid catabolic process	0.781513	-0.246524	1	31	1	0.00191571	522	10917	38147	CG9149
GO:0045787	positive regulation of cell cycle	0.781513	-0.246524	1	31	1	0.00191571	522	10917	45574	ida
GO:0009063	cellular amino acid catabolic process	0.781513	-0.246524	1	31	1	0.00191571	522	10917	32625	P5CDh2
GO:0080135	regulation of cellular response to stress	0.786136	-0.240626	1	86	3	0.00574713	522	10917	410204062033288	Mkk4,cno,Pino
GO:0060968	regulation of gene silencing	0.788628	-0.23746	1	60	2	0.00383142	522	10917	3864831381	scny,rb
GO:0046395	carboxylic acid catabolic process	0.788628	-0.23746	1	60	2	0.00383142	522	10917	3814732625	CG9149,P5CDh2
GO:0016054	organic acid catabolic process	0.788628	-0.23746	1	60	2	0.00383142	522	10917	3814732625	CG9149,P5CDh2
GO:0098609	cell-cell adhesion	0.788628	-0.23746	1	60	2	0.00383142	522	10917	4277833245	beat-IV,ds
GO:0050808	synapse organization	0.789757	-0.23603	1	112	4	0.00766284	522	10917	3.27994e+19	Frq2,Mical,S6kII,Frq1
GO:0022008	neurogenesis	0.790516	-0.23507	1	1370	60	0.114943	522	10917	40620,45380,41835,47080,31011,33661,39085,43873,35110,32918,39817,31309,39564,47220,43415,45783,40835,33903,35066,45318,38884,45248,32718,32140,39203,40094,35927,39644,30983,33636,33434,5740325,37220,33474,36430,34947,34876,31003,39885,42596,34636,40699,34906,42356,42852,43428,42770,41020,34193,31168,40790,41225,31227,33139,31350,36076,45574,31239,33245,37555	cno,spin,CG31344,acj6,Dredd,HP6,aay,ras,amos,Hs3st-B,CG4842,dnc,btl,Fur1,Doa,Aats-val,Antp,mmy,Oli,kn,exex,Nckx30C,f,p24-1,E(z),Bet1,Su(var)2-10,Aats-gly,l(1)sc,Atet,Slh,CG42732,CG9975,daw,CG13321,beat-Ia,l(2)35Bc,vnd,sinah,how,Rab6,Xe7,wor,bnl,Hsp68,Pkc98E,Irk2,Mkk4,Glt,moody,TfIIFalpha,Mical,gt,S6kII,lva,Hdc,ida,egh,ds,wrapper
GO:0046467	membrane lipid biosynthetic process	0.79199	-0.233207	1	32	1	0.00191571	522	10917	36049	CG2292
GO:0006626	protein targeting to mitochondrion	0.79199	-0.233207	1	32	1	0.00191571	522	10917	37337	CG11110
GO:0016246	RNA interference	0.79199	-0.233207	1	32	1	0.00191571	522	10917	34524	aub
GO:0072655	establishment of protein localization to mitochondrion	0.79199	-0.233207	1	32	1	0.00191571	522	10917	37337	CG11110
GO:0031124	mRNA 3'-end processing	0.79199	-0.233207	1	32	1	0.00191571	522	10917	42752	orb
GO:0043547	positive regulation of GTPase activity	0.79199	-0.233207	1	32	1	0.00191571	522	10917	32253	rad
GO:0048806	genitalia development	0.79199	-0.233207	1	32	1	0.00191571	522	10917	34127	Pvr
GO:0050777	negative regulation of immune response	0.79199	-0.233207	1	32	1	0.00191571	522	10917	38648	scny
GO:0010720	positive regulation of cell development	0.79199	-0.233207	1	32	1	0.00191571	522	10917	31350	lva
GO:0070585	protein localization to mitochondrion	0.79199	-0.233207	1	32	1	0.00191571	522	10917	37337	CG11110
GO:0001707	mesoderm formation	0.79199	-0.233207	1	32	1	0.00191571	522	10917	42596	how
GO:0048592	eye morphogenesis	0.795462	-0.228832	1	258	10	0.0191571	522	10917	1.17353e+50	Cct1,cno,Doa,aux,Hrb98DE,Hdc,beat-Ia,Hs3st-B,ds,Rab6
GO:0044093	positive regulation of molecular function	0.795478	-0.228812	1	113	4	0.00766284	522	10917	4.23564e+19	bnl,btl,Mkk4,rad
GO:0010769	regulation of cell morphogenesis involved in differentiation	0.796255	-0.227836	1	61	2	0.00383142	522	10917	3956431350	btl,lva
GO:0001763	morphogenesis of a branching structure	0.796255	-0.227836	1	61	2	0.00383142	522	10917	4235639564	bnl,btl
GO:0007424	open tracheal system development	0.796933	-0.226985	1	211	8	0.0153257	522	10917	4.23564e+39	bnl,serp,btl,mmy,Mmp1,colt,verm,ds
GO:0061458	reproductive system development	0.799027	-0.22436	1	88	3	0.00574713	522	10917	428033412737619	Hmgcr,Pvr,stl
GO:0048608	reproductive structure development	0.799027	-0.22436	1	88	3	0.00574713	522	10917	428033412737619	Hmgcr,Pvr,stl
GO:0010498	proteasomal protein catabolic process	0.801074	-0.221802	1	114	4	0.00766284	522	10917	3.37054e+19	jet,fzr2,sinah,pall
GO:0007015	actin filament organization	0.801074	-0.221802	1	114	4	0.00766284	522	10917	3.26964e+19	Arpc3B,Mical,f,Pvr
GO:0007389	pattern specification process	0.801394	-0.221403	1	513	21	0.0402299	522	10917	4.06203e+104	cno,aub,EloA,orb,Slh,amos,vnd,Hs3st-B,BicD,Rab6,Pkc98E,Doa,gt,S6kII,Antp,eca,kn,wol,f,ds,mael
GO:0015698	inorganic anion transport	0.801965	-0.22069	1	33	1	0.00191571	522	10917	43561	CG7912
GO:0007156	homophilic cell adhesion	0.801965	-0.22069	1	33	1	0.00191571	522	10917	33245	ds
GO:0033206	meiotic cytokinesis	0.801965	-0.22069	1	33	1	0.00191571	522	10917	36699	Arf51F
GO:0050773	regulation of dendrite development	0.801965	-0.22069	1	33	1	0.00191571	522	10917	31350	lva
GO:0060581	cell fate commitment involved in pattern specification	0.801965	-0.22069	1	33	1	0.00191571	522	10917	35110	amos
GO:0006026	aminoglycan catabolic process	0.801965	-0.22069	1	33	1	0.00191571	522	10917	39869	PGRP-SB2
GO:0048332	mesoderm morphogenesis	0.801965	-0.22069	1	33	1	0.00191571	522	10917	42596	how
GO:0042659	regulation of cell fate specification	0.801965	-0.22069	1	33	1	0.00191571	522	10917	33139	S6kII
GO:2000027	regulation of organ morphogenesis	0.805226	-0.216633	1	89	3	0.00574713	522	10917	332453988533139	ds,sinah,S6kII
GO:0048598	embryonic morphogenesis	0.805694	-0.216051	1	237	9	0.0172414	522	10917	3.12393e+46	egh,Myo10A,cno,l(1)sc,how,Pvr,cp309,mmy,Ptr
GO:0031323	regulation of cellular metabolic process	0.806327	-0.215266	1	1357	59	0.113027	522	10917	36769,40620,38648,42749,34485,47080,31011,42869,41960,36619,35110,37079,34064,39564,33458,8674054,43415,40835,31789,42452,35066,45318,38884,43495,39527,42803,39203,318751,38412,37755,32245,42521,30983,34524,50133,42752,43385,39935,41943,31003,40133,42596,34127,31381,34906,42356,41020,41427,33779,47894,40790,40918,31227,32253,4379907,32353,40489,31807,3355150	casp,cno,scny,EloA,CG17124,acj6,Dredd,CG6182,CG5916,tra2,amos,MED9,LKR,btl,Hrs,Sfp23F,Doa,Antp,otu,Oct-TyrR,Oli,kn,exex,dmrt99B,bru-3,Hmgcr,E(z),CG31467,CG11526,Sesn,fne,e,l(1)sc,aub,CG13551,orb,Hrb98DE,tap,Hel89B,vnd,ash1,how,Pvr,rb,wor,bnl,Mkk4,Sbf,tomb,hbn,TfIIFalpha,Sp7,gt,rad,Mkp,mamo,mael,CG11294,AGO3
GO:0009791	post-embryonic development	0.809465	-0.211382	1	674	28	0.0536398	522	10917	1.17353e+142	Cct1,Eig71Ef,Obp99b,spin,EloA,Mmp1,CG6175,Eig71Ed,Cyp301a1,dy,Hs3st-B,how,Pvr,svr,CG30456,Doa,Mical,S6kII,RpL7,kn,Cyp18a1,f,CG9518,alpha-Est10,ds,santa-maria,mld,Ppcs
GO:0048813	dendrite morphogenesis	0.809882	-0.210866	1	190	7	0.01341	522	10917	3.96444e+34	Aats-gly,amos,Mical,E(z),acj6,wor,kn
GO:0044723	single-organism carbohydrate metabolic process	0.809882	-0.210866	1	190	7	0.01341	522	10917	3.41344e+34	wol,Gale,Arf51F,Tpi,CG1516,Arf79F,alpha-Man-I
GO:0050767	regulation of neurogenesis	0.810722	-0.20983	1	141	5	0.00957854	522	10917	3.95643e+24	btl,S6kII,sinah,Hs3st-B,lva
GO:0043086	negative regulation of catalytic activity	0.81078	-0.209758	1	63	2	0.00383142	522	10917	4379907318751	Mkp,CG31467
GO:0050770	regulation of axonogenesis	0.811463	-0.208917	1	34	1	0.00191571	522	10917	39564	btl
GO:0042059	negative regulation of epidermal growth factor receptor signaling pathway	0.811463	-0.208917	1	34	1	0.00191571	522	10917	33458	Hrs
GO:0042306	regulation of protein import into nucleus	0.811463	-0.208917	1	34	1	0.00191571	522	10917	33139	S6kII
GO:0008277	regulation of G-protein coupled receptor protein signaling pathway	0.811463	-0.208917	1	34	1	0.00191571	522	10917	42452	Oct-TyrR
GO:0007354	zygotic determination of anterior/posterior axis, embryo	0.811463	-0.208917	1	34	1	0.00191571	522	10917	31227	gt
GO:1901185	negative regulation of ERBB signaling pathway	0.811463	-0.208917	1	34	1	0.00191571	522	10917	33458	Hrs
GO:0006664	glycolipid metabolic process	0.811463	-0.208917	1	34	1	0.00191571	522	10917	36049	CG2292
GO:0007275	multicellular organismal development	0.811642	-0.208696	1	2741	123	0.235632	522	10917	43582,40620,45380,42749,41835,33661,39085,39704,41136,35110,43564,36929,35773,43415,40835,40664,45318,35066,32028,32858,34024,36589,39368,42521,3772382,31957,33636,39150,37949,39611,42752,5740325,37220,34894,36430,34947,40133,37703,31003,39885,42596,34636,31381,34906,43428,34193,41225,31168,40790,31227,34352,33470,34134,45574,38999,31239,40489,40896,38636,40150,40527,47080,31011,40149,36619,43873…	Tpi,cno,spin,EloA,CG31344,HP6,aay,Eig71Ed,RhoL,amos,RpS28a,CG30456,slv,Doa,Antp,Itp-r83A,kn,Oli,Myo10A,Cyp18a1,santa-maria,Ih,rols,e,cp309,alpha-Man-I,Atet,Ilp2,Mmp1,bmm,orb,CG42732,CG9975,yuri,CG13321,beat-Ia,ash1,yellow-d,vnd,sinah,how,Rab6,rb,wor,Pkc98E,Glt,Mical,moody,TfIIFalpha,gt,RpL7,colt,wol,ida,Cp15,egh,mael,alpha-Est10,mthl2,serp,aux,acj6,Dredd,verm,tra2,ras,Cyp301a1,Hs3st-B,dy,CG4842,e…
GO:0033554	cellular response to stress	0.813554	-0.206343	1	449	18	0.0344828	522	10917	3.17644e+89	Corp,cno,spin,Letm1,CG10898,RhoL,Pvr,Victoria,Rad9,Mkk4,Adgf-A,TotM,Fer3HCH,fab1,TotA,CG8993,Atg8b,Su(var)2-10
GO:2000026	regulation of multicellular organismal development	0.816479	-0.202754	1	404	16	0.0306513	522	10917	4.23564e+79	bnl,btl,Hrs,Mkk4,cno,spin,e,Arf79F,S6kII,aub,lva,kn,Hs3st-B,ds,sinah,mael
GO:0048515	spermatid differentiation	0.81712	-0.201969	1	117	4	0.00766284	522	10917	3.48944e+19	yuri,aux,spag4,Dredd
GO:0007164	establishment of tissue polarity	0.817141	-0.201944	1	91	3	0.00574713	522	10917	1173534062033240	Cct1,cno,ds
GO:0001736	establishment of planar polarity	0.817141	-0.201944	1	91	3	0.00574713	522	10917	1173534062033240	Cct1,cno,ds
GO:0007163	establishment or maintenance of cell polarity	0.818209	-0.200637	1	192	7	0.01341	522	10917	1.17353e+35	Cct1,egh,cno,mael,ds,Rab6,BicD
GO:0001654	eye development	0.818625	-0.200129	1	335	13	0.0249042	522	10917	1.17353e+65	Cct1,cno,Doa,Arf79F,aux,Hrb98DE,Hdc,beat-Ia,Nckx30C,ds,Hs3st-B,Rab6,Su(var)2-10
GO:0007444	imaginal disc development	0.818933	-0.199753	1	633	26	0.0498084	522	10917	1.17353e+130	Cct1,EloA,Mmp1,Slh,CG6175,Cyp301a1,dy,Hs3st-B,how,svr,Pvr,bnl,RpS28a,Irk2,CG30456,btl,S6kII,eca,kn,ida,Cyp18a1,alpha-Est10,ds,f,Su(var)2-10,Ppcs
GO:0007300	ovarian nurse cell to oocyte transport	0.820506	-0.197834	1	35	1	0.00191571	522	10917	42295	Ppcs
GO:0016198	axon choice point recognition	0.820506	-0.197834	1	35	1	0.00191571	522	10917	34947	beat-Ia
GO:0010453	regulation of cell fate commitment	0.820506	-0.197834	1	35	1	0.00191571	522	10917	33139	S6kII
GO:1900180	regulation of protein localization to nucleus	0.820506	-0.197834	1	35	1	0.00191571	522	10917	33139	S6kII
GO:0007494	midgut development	0.820506	-0.197834	1	35	1	0.00191571	522	10917	40835	Antp
GO:0007173	epidermal growth factor receptor signaling pathway	0.820506	-0.197834	1	35	1	0.00191571	522	10917	44095	fus
GO:0038127	ERBB signaling pathway	0.820506	-0.197834	1	35	1	0.00191571	522	10917	44095	fus
GO:0007423	sensory organ development	0.821837	-0.196213	1	452	18	0.0344828	522	10917	1.17353e+90	Cct1,cno,aux,Hrb98DE,beat-Ia,tap,amos,sinah,Hs3st-B,Rab6,Doa,Arf79F,Hdc,Nckx30C,f,ds,Su(var)2-10,Ppcs
GO:0006996	organelle organization	0.822859	-0.194971	1	1476	64	0.122605	522	10917	37580,40620,45380,38648,33661,32696,37663,41303,37808,32918,34064,33458,37849,39338,43415,31204,40664,33672,31789,33172,34966,37033,3772559,39203,32718,35927,42295,40848,37337,33230,39368,41884,36492,34524,3772382,37912,40221,31613,34894,40133,42596,34127,35051,34636,31381,41067,45329,326120,43428,41427,31168,33779,41225,31144,34678,34352,41177,34134,36699,31239,33245,32353,40489,41739	RpS16,cno,spin,scny,HP6,Arpc3B,CG3085,CG4565,fzr2,Hs3st-B,LKR,Hrs,RpL39,RpL10Ab,Doa,pcx,Itp-r83A,Taf12L,otu,Gs1,Syx5,fab1,Skeletor,E(z),f,Su(var)2-10,Ppcs,alphaTub84B,CG11110,rempA,rols,CG6118,cbs,aub,cp309,Letm1,Clc,RpL17,yuri,ash1,how,Pvr,BicD,Rab6,rb,skap,RpL12,HdacX,Pkc98E,Sbf,moody,tomb,Mical,Vps26,CG5781,RpL7,eca,wol,Arf51F,egh,ds,mamo,mael,CG3259
GO:0010975	regulation of neuron projection development	0.824376	-0.193128	1	65	2	0.00383142	522	10917	3956431350	btl,lva
GO:0019827	stem cell maintenance	0.824376	-0.193128	1	65	2	0.00383142	522	10917	4259643385	how,Hrb98DE
GO:0048589	developmental growth	0.824834	-0.192573	1	144	5	0.00957854	522	10917	4.06204e+24	cno,Mmp1,verm,Su(var)2-10,dnc
GO:0016358	dendrite development	0.82625	-0.190857	1	194	7	0.01341	522	10917	3.96444e+34	Aats-gly,amos,Mical,E(z),acj6,wor,kn
GO:0060541	respiratory system development	0.828558	-0.188069	1	219	8	0.0153257	522	10917	4.23564e+39	bnl,serp,btl,mmy,Mmp1,colt,verm,ds
GO:0009894	regulation of catabolic process	0.829023	-0.187507	1	170	6	0.0114943	522	10917	4.19603e+31	CG5916,aub,rad,AGO3,CG6182,Su(var)2-10
GO:0045747	positive regulation of Notch signaling pathway	0.829116	-0.187395	1	36	1	0.00191571	522	10917	40675	CRMP
GO:0001704	formation of primary germ layer	0.829116	-0.187395	1	36	1	0.00191571	522	10917	42596	how
GO:0031935	regulation of chromatin silencing	0.829116	-0.187395	1	36	1	0.00191571	522	10917	38648	scny
GO:0006367	transcription initiation from RNA polymerase II promoter	0.83084	-0.185318	1	66	2	0.00383142	522	10917	4079033672	TfIIFalpha,Taf12L
GO:0003006	developmental process involved in reproduction	0.833951	-0.181581	1	775	32	0.0613027	522	10917	4.53804e+160	spin,aux,Dredd,tra2,ras,RhoL,stl,dnc,Hrs,btl,Doa,CG15571,otu,Cyp18a1,Hmgcr,Ppcs,Cct1,rols,aub,orb,Hrb98DE,Cp38,yuri,ash1,Pvr,Rab6,BicD,spag4,egh,Cp15,mael,Nup44A
GO:0048563	post-embryonic organ morphogenesis	0.835044	-0.180271	1	457	18	0.0344828	522	10917	1.17353e+90	Cct1,EloA,Mmp1,CG6175,Cyp301a1,svr,Pvr,how,dy,Hs3st-B,CG30456,S6kII,kn,Cyp18a1,f,alpha-Est10,ds,Ppcs
GO:0007560	imaginal disc morphogenesis	0.835044	-0.180271	1	457	18	0.0344828	522	10917	1.17353e+90	Cct1,EloA,Mmp1,CG6175,Cyp301a1,svr,Pvr,how,Hs3st-B,dy,CG30456,S6kII,kn,Cyp18a1,f,alpha-Est10,ds,Ppcs
GO:0034654	nucleobase-containing compound biosynthetic process	0.835756	-0.179419	1	317	12	0.0229885	522	10917	4.07903e+59	TfIIFalpha,Taf12L,CG7368,EloA,Adgf-A,CG8080,ras,CG2246,Prat2,Gyc-89Da,CG8417,Ppcs
GO:0032386	regulation of intracellular transport	0.837088	-0.177826	1	67	2	0.00383142	522	10917	3313941177	S6kII,eca
GO:0010970	microtubule-based transport	0.837314	-0.177556	1	37	1	0.00191571	522	10917	33230	rempA
GO:0002009	morphogenesis of an epithelium	0.838128	-0.176584	1	294	11	0.0210728	522	10917	4.23564e+55	bnl,btl,Cct1,cno,l(1)sc,mmy,egh,Myo10A,Pvr,ds,Ppcs
GO:0001745	compound eye morphogenesis	0.83828	-0.176403	1	246	9	0.0172414	522	10917	1.17353e+45	Cct1,cno,Doa,aux,Hrb98DE,Hdc,Hs3st-B,ds,Rab6
GO:0048585	negative regulation of response to stimulus	0.841131	-0.173008	1	271	10	0.0191571	522	10917	4.27703e+51	Irk2,Hrs,casp,spin,kappaB-Ras,scny,S6kII,Ilp2,Mkp,Su(var)2-10
GO:0044802	single-organism membrane organization	0.841492	-0.172579	1	122	4	0.00766284	522	10917	3.41344e+19	wol,Srp68,fab1,CG10420
GO:0043603	cellular amide metabolic process	0.843127	-0.170637	1	68	2	0.00383142	522	10917	4252138973	e,se
GO:0006979	response to oxidative stress	0.844247	-0.169311	1	96	3	0.00574713	522	10917	406644200144121	Itp-r83A,Gyc-89Da,TotA
GO:0048729	tissue morphogenesis	0.844654	-0.168829	1	320	12	0.0229885	522	10917	4.23564e+60	bnl,btl,Cct1,cno,l(1)sc,mmy,egh,Myo10A,Pvr,how,ds,Ppcs
GO:0048749	compound eye development	0.844654	-0.168829	1	320	12	0.0229885	522	10917	1.17353e+60	Cct1,cno,Doa,Arf79F,aux,Hrb98DE,Hdc,Nckx30C,ds,Hs3st-B,Rab6,Su(var)2-10
GO:0050790	regulation of catalytic activity	0.844911	-0.168524	1	248	9	0.0172414	522	10917	4.23564e+47	bnl,btl,Mkk4,rad,Oct-TyrR,CG6182,CG5916,Mkp,CG31467
GO:0032388	positive regulation of intracellular transport	0.845119	-0.168277	1	38	1	0.00191571	522	10917	41177	eca
GO:0006633	fatty acid biosynthetic process	0.845119	-0.168277	1	38	1	0.00191571	522	10917	326148	CG31523
GO:0044724	single-organism carbohydrate catabolic process	0.845119	-0.168277	1	38	1	0.00191571	522	10917	43582	Tpi
GO:0040029	regulation of gene expression, epigenetic	0.846025	-0.167206	1	123	4	0.00766284	522	10917	4.01334e+21	ash1,E(z),aub,AGO3
GO:0001700	embryonic development via the syncytial blastoderm	0.848801	-0.163931	1	175	6	0.0114943	522	10917	3.60714e+29	KCNQ,cno,Myo10A,ash1,mmy,kn
GO:0060627	regulation of vesicle-mediated transport	0.848963	-0.16374	1	69	2	0.00383142	522	10917	4050635051	Arf79F,BicD
GO:0048546	digestive tract morphogenesis	0.848963	-0.16374	1	69	2	0.00383142	522	10917	3098334127	l(1)sc,Pvr
GO:0042461	photoreceptor cell development	0.84923	-0.163425	1	97	3	0.00574713	522	10917	434153463636076	Doa,Rab6,Hdc
GO:0048569	post-embryonic organ development	0.849409	-0.163215	1	486	19	0.0363985	522	10917	1.17353e+95	Cct1,EloA,Mmp1,CG6175,Cyp301a1,dy,Hs3st-B,how,svr,Pvr,CG30456,Mical,S6kII,kn,Cyp18a1,alpha-Est10,f,ds,Ppcs
GO:0000209	protein polyubiquitination	0.852551	-0.159522	1	39	1	0.00191571	522	10917	31315	CG16781
GO:0051346	negative regulation of hydrolase activity	0.852551	-0.159522	1	39	1	0.00191571	522	10917	318751	CG31467
GO:0010160	formation of organ boundary	0.852551	-0.159522	1	39	1	0.00191571	522	10917	35110	amos
GO:0061245	establishment or maintenance of bipolar cell polarity	0.852551	-0.159522	1	39	1	0.00191571	522	10917	33245	ds
GO:0007455	eye-antennal disc morphogenesis	0.852551	-0.159522	1	39	1	0.00191571	522	10917	32718	f
GO:0006099	tricarboxylic acid cycle	0.852551	-0.159522	1	39	1	0.00191571	522	10917	41067	skap
GO:0051052	regulation of DNA metabolic process	0.852551	-0.159522	1	39	1	0.00191571	522	10917	31789	otu
GO:0030705	cytoskeleton-dependent intracellular transport	0.852551	-0.159522	1	39	1	0.00191571	522	10917	33230	rempA
GO:0035088	establishment or maintenance of apical/basal cell polarity	0.852551	-0.159522	1	39	1	0.00191571	522	10917	33245	ds
GO:0035120	post-embryonic appendage morphogenesis	0.852827	-0.159199	1	394	15	0.0287356	522	10917	3.69291e+75	CG30456,Cct1,S6kII,EloA,kn,CG6175,Cyp18a1,f,ds,svr,how,dy,Hs3st-B,alpha-Est10,Ppcs
GO:0051128	regulation of cellular component organization	0.853238	-0.158716	1	557	22	0.0421456	522	10917	4.08484e+109	alphaTub84B,cno,spin,aub,Ilp2,Arpc3B,CG4629,RhoL,Pvr,BicD,skap,LKR,btl,sals,TfIIFalpha,Arf79F,lva,ida,mamo,mael,cdc14,Sesn
GO:0007498	mesoderm development	0.854075	-0.157736	1	98	3	0.00574713	522	10917	395644113642596	btl,RhoL,how
GO:0050793	regulation of developmental process	0.855356	-0.156237	1	581	23	0.0440613	522	10917	4.06205e+114	cno,spin,e,scny,aub,Hrb98DE,CG4629,RhoL,Hs3st-B,how,Pvr,sinah,bnl,btl,Hrs,Mkk4,sals,S6kII,Arf79F,lva,kn,ds,mael
GO:0033043	regulation of organelle organization	0.856221	-0.155227	1	227	8	0.0153257	522	10917	3.40644e+39	LKR,alphaTub84B,sals,Arpc3B,ida,mamo,cdc14,skap
GO:0007476	imaginal disc-derived wing morphogenesis	0.856295	-0.155141	1	348	13	0.0249042	522	10917	1.17353e+65	Cct1,S6kII,EloA,kn,CG6175,f,ds,how,Hs3st-B,dy,alpha-Est10,svr,Ppcs
GO:0009968	negative regulation of signal transduction	0.859412	-0.151506	1	228	8	0.0153257	522	10917	4.27703e+41	Irk2,Hrs,casp,spin,kappaB-Ras,S6kII,Mkp,Su(var)2-10
GO:0010004	gastrulation involving germ band extension	0.859626	-0.151257	1	40	1	0.00191571	522	10917	35546	Ptr
GO:0009060	aerobic respiration	0.859626	-0.151257	1	40	1	0.00191571	522	10917	41067	skap
GO:0055059	asymmetric neuroblast division	0.859626	-0.151257	1	40	1	0.00191571	522	10917	34906	wor
GO:0046822	regulation of nucleocytoplasmic transport	0.859626	-0.151257	1	40	1	0.00191571	522	10917	33139	S6kII
GO:0001703	gastrulation with mouth forming first	0.859626	-0.151257	1	40	1	0.00191571	522	10917	35546	Ptr
GO:0008105	asymmetric protein localization	0.859626	-0.151257	1	40	1	0.00191571	522	10917	34524	aub
[truncated: 3,980 more rows]

## Sheet: Cl2
Significant GO terms	TermID	Term	Enrichment	logP	FDR_BH	Genes in Term	Target Genes in Term	Fraction of Targets in Term	Total Target Genes	Total Genes	Entrez Gene IDs	Gene Symbols
FDR_BH p<0.01	GO:0048699	generation of neurons	1.03e-26	-59.8398	3.62e-23	848	138	0.2	690	10917	35900,35184,38788,36876,53437,50320,37007,43234,42496,33840,36445,42358,38168,40225,40143,35266,34073,42187,42297,31883,43656,31045,37201,38863,40515,38961,37552,32743,43469,41363,38067,317817,249072,38218,34927,53563,43803,36176,39537,33607,35037,42986,43758,33392,35523,35259,35378,39873,38185,35197,32723,38469,31017,5740176,36295,42150,43146,36436,37888,37230,41085,36010,35680,32039,31290,34192…	babo,Lim3,Dscam2,unc-104,Sulf1,dpr12,Sema-1b,ro,RhoGAP93B,CG9098,Nrk,Ire1,rho,gogo,wnd,bsh,CG14535,CG7156,nos,lz,tll,CG3703,ena,Ank2,nrm,Cbl,Liprin-gamma,RhoGAPp190,Ptp99A,pros,klar,CG32006,Liprin-alpha,drpr,Gli,gukh,Eph,metro,CG32137,slp1,beat-IIIc,ssh,RhoGAP100F,aop,mle,Lar,Dap160,Nrt,CG12004,brat,B-H2,scrt,sdk,CG34340,jeb,Rim,boss,Drl-2,betaTub60D,hts,neur,dila,didum,sev,rst,Sema-1a,seq,gcm2,S…
	GO:0030182	neuron differentiation	1.21e-26	-59.6747	3.62e-23	751	128	0.185507	690	10917	35900,35184,44786,38788,33262,36876,34385,5740544,41861,53437,50320,41612,37007,33418,43234,45278,42496,33840,36445,42358,38168,40225,40143,35267,36703,42896,35266,34073,42707,42187,37066,39717,42297,33608,31883,31364,31045,53472,43690,33239,32850,37201,38863,40515,38961,37552,32743,43469,36606,41363,38067,33916,317817,249072,32724,38218,38755,34927,53563,43803,36176,39537,33607,37781,44642,35037…	babo,Lim3,nerfin-1,Dscam2,dock,unc-104,Cdk5alpha,futsch,Sra-1,Sulf1,dpr12,sim,Sema-1b,Rab5,ro,csw,RhoGAP93B,CG9098,Nrk,Ire1,rho,gogo,wnd,CdGAPr,unc-5,crb,bsh,CG14535,klg,CG7156,Sema-5c,comm,nos,slp2,lz,Fas2,CG3703,Aplip1,chp,Pph13,Rip11,ena,Ank2,nrm,Cbl,Liprin-gamma,RhoGAPp190,Ptp99A,phyl,pros,klar,eya,CG32006,Liprin-alpha,B-H1,drpr,tow,Gli,gukh,Eph,metro,CG32137,slp1,TBPH,Apc,beat-IIIc,Npc2a,sv,…
	GO:0065007	biological regulation	1.43e-24	-54.9066	2.84e-21	3325	334	0.484058	690	10917	37614,35184,32429,318005,35832,31456,43806,35997,36064,39617,43783,43234,42496,33840,36445,41625,32637,47091,35646,41704,42297,43656,42110,47746,49701,39999,38504,43317,37201,31107,38961,38786,5740362,39673,249072,317817,45816,4379834,36176,34646,33607,33520,43758,39063,40876,33392,41096,35378,35259,42561,37516,35977,35197,38469,5740176,31017,39418,36295,40471,36436,43146,40288,37230,35680,34431,…	CG42260,Lim3,hiw,sphinx1,mtt,SK,CG9935,Mmp2,gem,DCX-EMAP,Syt7,ro,RhoGAP93B,CG9098,Nrk,Ace,mthl1,comt,Gadd45,rdx,nos,tll,Hmx,Lk,gish,Eip75B,tipE,Tusp,ena,Nmdar2,Cbl,corn,CG34384,Z600,Liprin-alpha,CG32006,onecut,stnB,metro,crok,slp1,cnir,RhoGAP100F,PGRP-LC,Syt4,aop,ird1,Dap160,Lar,GABA-B-R2,GlcT-1,brp,brat,scrt,CG34340,sdk,toe,jeb,CG11426,Drl-2,boss,cmpy,hts,didum,CG5337,sev,rst,GABA-B-R1,CG9293,Gy…
	GO:0048666	neuron development	4.5e-24	-53.7584	6.72e-21	652	113	0.163768	690	10917	35900,35184,44786,38788,33262,36876,34385,5740544,41861,53437,50320,41612,37007,33418,42496,33840,36445,42358,38168,40225,40143,35267,36703,42896,34073,42187,37066,39717,42297,33608,31883,31364,31045,53472,43690,33239,32850,37201,38863,40515,32743,37552,43469,36606,41363,38067,33916,317817,249072,38218,34927,53563,43803,36176,39537,33607,37781,44642,35037,33374,43825,41997,43758,33392,40715,35523…	babo,Lim3,nerfin-1,Dscam2,dock,unc-104,Cdk5alpha,futsch,Sra-1,Sulf1,dpr12,sim,Sema-1b,Rab5,RhoGAP93B,CG9098,Nrk,Ire1,rho,gogo,wnd,CdGAPr,unc-5,crb,CG14535,CG7156,Sema-5c,comm,nos,slp2,lz,Fas2,CG3703,Aplip1,chp,Pph13,Rip11,ena,Ank2,nrm,RhoGAPp190,Liprin-gamma,Ptp99A,phyl,pros,klar,eya,CG32006,Liprin-alpha,drpr,Gli,gukh,Eph,metro,CG32137,slp1,TBPH,Apc,beat-IIIc,Npc2a,sv,CG14883,RhoGAP100F,aop,kat-6…
	GO:0050794	regulation of cellular process	1.87e-22	-50.0292	2.24e-19	2824	292	0.423188	690	10917	37614,35184,32429,318005,35832,43806,35997,36064,39617,43234,42496,33840,36445,32637,47091,35646,41704,42297,43656,42110,47746,49701,39999,43317,37201,31107,38961,38786,5740362,39673,249072,317817,45816,4379834,36176,33607,33520,43758,39063,40876,33392,41096,35378,35259,42561,37516,35977,35197,38469,5740176,31017,39418,36295,40471,36436,43146,40288,35680,34431,32039,34878,34752,34553,41392,36750,…	CG42260,Lim3,hiw,sphinx1,mtt,CG9935,Mmp2,gem,DCX-EMAP,ro,RhoGAP93B,CG9098,Nrk,mthl1,comt,Gadd45,rdx,nos,tll,Hmx,Lk,gish,Eip75B,Tusp,ena,Nmdar2,Cbl,corn,CG34384,Z600,Liprin-alpha,CG32006,onecut,stnB,metro,slp1,cnir,RhoGAP100F,PGRP-LC,Syt4,aop,ird1,Dap160,Lar,GABA-B-R2,GlcT-1,brp,brat,scrt,CG34340,sdk,toe,jeb,CG11426,Drl-2,boss,cmpy,didum,CG5337,sev,GABA-B-R1,CG9293,Gyc32E,Jupiter,Mlf,Mob2,loco,peb…
	GO:0044700	single organism signaling	8.88e-22	-48.4732	7.58e-19	1363	175	0.253623	690	10917	37614,35900,32429,35832,43806,36876,35997,43683,31718,39617,43783,32619,33840,36445,42358,38168,41625,40143,32637,47091,35646,41704,31883,43656,36897,47746,5740204,49701,39999,37824,31667,43317,38863,31107,38961,37552,32743,32290,5740362,249072,4379834,43803,36176,42733,33520,37633,43528,43758,39063,34367,40876,33392,117407,35378,42561,32005,35977,35197,32723,31744,42150,40471,36436,43146,39620,4…	CG42260,babo,hiw,mtt,CG9935,unc-104,Mmp2,stops,Tbh,DCX-EMAP,Syt7,para,CG9098,Nrk,Ire1,rho,Ace,wnd,mthl1,comt,Gadd45,rdx,lz,tll,inaC,Lk,clos,gish,Eip75B,Pask,Dok,Tusp,Ank2,Nmdar2,Cbl,Liprin-gamma,RhoGAPp190,Syt12,CG34384,Liprin-alpha,stnB,Eph,metro,CG13830,cnir,PIP5K59B,Cad99C,RhoGAP100F,PGRP-LC,Ror,Syt4,aop,Tsp68C,Dap160,GABA-B-R2,CG32676,brp,brat,B-H2,Gbeta5,Rim,CG11426,Drl-2,boss,Brd,neur,RabX4…
	GO:0023052	signaling	8.88e-22	-48.4732	7.58e-19	1363	175	0.253623	690	10917	37614,35900,32429,35832,43806,36876,35997,43683,31718,39617,43783,32619,33840,36445,42358,38168,41625,40143,32637,47091,35646,41704,31883,43656,36897,47746,49701,5740204,39999,37824,31667,43317,38863,31107,32743,38961,37552,32290,5740362,249072,4379834,43803,36176,42733,33520,37633,43528,43758,39063,34367,40876,33392,117407,35378,42561,32005,35977,32723,35197,31744,42150,40471,36436,43146,41085,3…	CG42260,babo,hiw,mtt,CG9935,unc-104,Mmp2,stops,Tbh,DCX-EMAP,Syt7,para,CG9098,Nrk,Ire1,rho,Ace,wnd,mthl1,comt,Gadd45,rdx,lz,tll,inaC,Lk,gish,clos,Eip75B,Pask,Dok,Tusp,Ank2,Nmdar2,RhoGAPp190,Cbl,Liprin-gamma,Syt12,CG34384,Liprin-alpha,stnB,Eph,metro,CG13830,cnir,PIP5K59B,Cad99C,RhoGAP100F,PGRP-LC,Ror,Syt4,aop,Tsp68C,Dap160,GABA-B-R2,CG32676,brp,B-H2,brat,Gbeta5,Rim,CG11426,Drl-2,boss,neur,Brd,RabX4…
	GO:0007154	cell communication	1.76e-21	-47.7911	1.31e-18	1418	179	0.25942	690	10917	37614,35900,32429,35832,43806,36447,36876,35997,43683,31718,39617,43783,32619,33840,36445,42358,38168,41625,40143,32637,47091,35646,41704,31883,43656,36897,47746,5740204,49701,39999,37824,31667,43317,38863,31107,38961,37552,32743,32290,5740362,249072,4379834,43803,36176,42733,33520,37633,43528,43758,39063,34367,40876,33392,117407,41096,35378,35259,42561,32005,35977,35197,32723,31744,42150,40471,3…	CG42260,babo,hiw,mtt,CG9935,GLaz,unc-104,Mmp2,stops,Tbh,DCX-EMAP,Syt7,para,CG9098,Nrk,Ire1,rho,Ace,wnd,mthl1,comt,Gadd45,rdx,lz,tll,inaC,Lk,clos,gish,Eip75B,Pask,Dok,Tusp,Ank2,Nmdar2,Cbl,Liprin-gamma,RhoGAPp190,Syt12,CG34384,Liprin-alpha,stnB,Eph,metro,CG13830,cnir,PIP5K59B,Cad99C,RhoGAP100F,PGRP-LC,Ror,Syt4,aop,Tsp68C,ird1,Dap160,Lar,GABA-B-R2,CG32676,brp,brat,B-H2,Gbeta5,Rim,CG11426,Drl-2,boss,…
	GO:0050789	regulation of biological process	6.89e-21	-46.424	4.58e-18	3053	304	0.44058	690	10917	37614,35184,32429,318005,35832,43806,35997,36064,39617,43234,42496,33840,36445,32637,47091,35646,41704,42297,43656,42110,47746,49701,39999,38504,43317,37201,31107,38961,38786,5740362,39673,249072,317817,45816,4379834,36176,33607,33520,43758,39063,40876,33392,41096,35378,35259,42561,37516,35977,35197,38469,5740176,31017,39418,36295,40471,36436,43146,40288,35680,34431,32039,31290,34878,34752,34553,…	CG42260,Lim3,hiw,sphinx1,mtt,CG9935,Mmp2,gem,DCX-EMAP,ro,RhoGAP93B,CG9098,Nrk,mthl1,comt,Gadd45,rdx,nos,tll,Hmx,Lk,gish,Eip75B,tipE,Tusp,ena,Nmdar2,Cbl,corn,CG34384,Z600,Liprin-alpha,CG32006,onecut,stnB,metro,slp1,cnir,RhoGAP100F,PGRP-LC,Syt4,aop,ird1,Dap160,Lar,GABA-B-R2,GlcT-1,brp,brat,scrt,CG34340,sdk,toe,jeb,CG11426,Drl-2,boss,cmpy,didum,CG5337,sev,rst,GABA-B-R1,CG9293,Gyc32E,Jupiter,Mlf,Mob2…
	GO:0061564	axon development	4.06e-19	-42.3473	2.43e-16	300	65	0.0942029	690	10917	35900,35184,44786,33262,36876,34385,5740544,41861,53437,41612,37007,33418,42496,36445,38168,40225,35267,40143,36703,37066,39717,33608,31364,37201,38863,43469,32743,37552,41363,249072,317817,33916,53563,43803,33607,44642,35037,43758,35523,35259,39441,39873,35197,36295,36436,34277,35070,37888,37230,45821,37447,44275,31290,3772396,34192,44355,46015,45976,36125,42025,39833,38231,37886,40462,33314	babo,Lim3,nerfin-1,dock,unc-104,Cdk5alpha,futsch,Sra-1,Sulf1,sim,Sema-1b,Rab5,RhoGAP93B,Nrk,rho,gogo,CdGAPr,wnd,unc-5,Sema-5c,comm,slp2,Fas2,ena,Ank2,Ptp99A,RhoGAPp190,Liprin-gamma,pros,Liprin-alpha,CG32006,eya,gukh,Eph,slp1,Apc,beat-IIIc,RhoGAP100F,mle,Lar,mirr,Nrt,brat,jeb,Drl-2,gcm,CadN,betaTub60D,hts,Abl,Sdc,SoxN,rst,seq,Sema-1a,drl,tutl,retn,stan,Fas1,aos,alpha-Spec,nvy,Hem,robo3
	GO:0007409	axonogenesis	4.98e-19	-42.143	2.71e-16	293	64	0.0927536	690	10917	35900,35184,44786,33262,36876,34385,41861,53437,5740544,41612,37007,33418,42496,36445,38168,40143,40225,35267,36703,39717,37066,33608,31364,37201,38863,37552,43469,41363,317817,249072,33916,53563,43803,33607,44642,35037,43758,35523,35259,39873,39441,35197,36295,36436,34277,37888,35070,37230,45821,37447,44275,31290,34192,3772396,46015,44355,45976,36125,39833,42025,38231,37886,40462,33314	babo,Lim3,nerfin-1,dock,unc-104,Cdk5alpha,Sra-1,Sulf1,futsch,sim,Sema-1b,Rab5,RhoGAP93B,Nrk,rho,wnd,gogo,CdGAPr,unc-5,comm,Sema-5c,slp2,Fas2,ena,Ank2,Liprin-gamma,Ptp99A,pros,CG32006,Liprin-alpha,eya,gukh,Eph,slp1,Apc,beat-IIIc,RhoGAP100F,mle,Lar,Nrt,mirr,brat,jeb,Drl-2,gcm,betaTub60D,CadN,hts,Abl,Sdc,SoxN,rst,Sema-1a,seq,tutl,drl,retn,stan,aos,Fas1,alpha-Spec,nvy,Hem,robo3
	GO:0048749	compound eye development	7.71e-19	-41.7068	3.84e-16	320	67	0.0971014	690	10917	31292,5740544,41861,43234,45278,36445,42358,36260,42896,42707,41704,31883,43656,49701,43690,33239,32850,37201,38961,36606,41363,38067,249072,33916,32724,42986,43825,43758,33392,38321,43023,35259,35662,39441,32723,45922,37185,31017,42210,39418,36295,35253,36848,43146,35070,45821,41085,32162,31229,35680,32039,31290,3772396,44856,44129,326198,36125,36771,39833,36555,41491,31802,39293,40383,38424,313…	kirre,futsch,Sra-1,ro,csw,Nrk,Ire1,Sobp,crb,klg,rdx,lz,tll,gish,chp,Pph13,Rip11,ena,Cbl,phyl,pros,klar,Liprin-alpha,eya,B-H1,ssh,sv,RhoGAP100F,aop,dos,dan,Lar,so,mirr,B-H2,rap,sano,sdk,gl,toe,jeb,spi,Syn2,boss,CadN,Abl,neur,fw,boi,didum,sev,rst,seq,ru,hbs,Krn,stan,SP2353,aos,mam,svp,oc,Mob2,M6,sty,peb,Pka-C1
	GO:0009653	anatomical structure morphogenesis	1.21e-18	-41.2576	5.56e-16	1663	192	0.278261	690	10917	35900,35184,38788,36876,35997,53437,37007,43234,42496,33840,36445,42358,38168,40225,40143,32637,43633,34073,42187,41704,42297,44543,31883,43656,31045,5740204,49701,31667,37201,38863,31069,38961,37552,43469,41363,38067,39673,317817,249072,38218,34927,36544,53563,43803,36176,39537,33607,35037,36609,43528,43758,33392,37341,35523,35259,43023,39873,35197,32723,38469,5740176,31017,34648,37185,36295,431…	babo,Lim3,Dscam2,unc-104,Mmp2,Sulf1,Sema-1b,ro,RhoGAP93B,CG9098,Nrk,Ire1,rho,gogo,wnd,mthl1,tmod,CG14535,CG7156,rdx,nos,enc,lz,tll,CG3703,clos,gish,Dok,ena,Ank2,CG11382,Cbl,Liprin-gamma,Ptp99A,pros,klar,Z600,CG32006,Liprin-alpha,drpr,Gli,AGO1,gukh,Eph,metro,CG32137,slp1,beat-IIIc,Oaz,Cad99C,RhoGAP100F,aop,CG11159,mle,Lar,dan,Nrt,brat,B-H2,scrt,CG34340,sdk,aret,sano,jeb,boss,Drl-2,betaTub60D,hts,B…
	GO:0001654	eye development	2.39e-18	-40.5765	1.02e-15	335	68	0.0985507	690	10917	31292,5740544,41861,43234,45278,36445,42358,36260,42896,42707,41704,31883,43656,31364,49701,43690,33239,32850,37201,38961,36606,41363,38067,249072,33916,32724,42986,43825,43758,33392,38321,43023,35259,35662,39441,32723,45922,37185,31017,42210,36295,39418,35253,36848,43146,35070,45821,41085,32162,31229,35680,32039,31290,3772396,44856,44129,326198,36125,36771,39833,36555,41491,31802,39293,40383,384…	kirre,futsch,Sra-1,ro,csw,Nrk,Ire1,Sobp,crb,klg,rdx,lz,tll,Fas2,gish,chp,Pph13,Rip11,ena,Cbl,phyl,pros,klar,Liprin-alpha,eya,B-H1,ssh,sv,RhoGAP100F,aop,dos,dan,Lar,so,mirr,B-H2,rap,sano,sdk,gl,jeb,toe,spi,Syn2,boss,CadN,Abl,neur,fw,boi,didum,sev,rst,seq,ru,hbs,Krn,stan,SP2353,aos,mam,svp,oc,Mob2,M6,sty,peb,Pka-C1
	GO:0048468	cell development	4.3e-18	-39.989	1.71e-15	1366	166	0.24058	690	10917	35900,35184,38788,36876,35997,53437,50320,37007,42496,33840,36445,42358,38168,40225,40143,34073,42187,42297,31883,44543,31045,5740204,49701,39999,37201,38863,40515,38961,37552,32743,43469,38816,41363,38067,317817,249072,38218,34927,36544,53563,43803,36176,39537,33607,35037,43528,43758,33392,37341,35523,35259,39873,38185,35197,38469,5740176,34648,36295,42150,43146,36436,37888,37230,41085,38418,360…	babo,Lim3,Dscam2,unc-104,Mmp2,Sulf1,dpr12,Sema-1b,RhoGAP93B,CG9098,Nrk,Ire1,rho,gogo,wnd,CG14535,CG7156,nos,lz,enc,CG3703,clos,gish,Eip75B,ena,Ank2,nrm,Cbl,Liprin-gamma,RhoGAPp190,Ptp99A,qm,pros,klar,CG32006,Liprin-alpha,drpr,Gli,AGO1,gukh,Eph,metro,CG32137,slp1,beat-IIIc,Cad99C,RhoGAP100F,aop,CG11159,mle,Lar,Nrt,CG12004,brat,scrt,CG34340,aret,jeb,Rim,boss,Drl-2,betaTub60D,hts,neur,kst,dila,didum…
	GO:0040011	locomotion	5.25e-18	-39.7888	1.96e-15	560	92	0.133333	690	10917	35900,35184,32429,44786,33262,36876,34385,40224,41861,53437,31718,41612,37007,33418,42496,45278,38605,36445,42567,41625,40225,35267,36703,41310,37066,39717,42297,33608,31364,49701,43950,37201,41426,43469,38961,38816,41363,38067,33916,317817,249072,34927,53563,39400,33607,44642,35037,38491,43758,33392,35259,46027,35662,39441,2768908,39873,35197,45922,36295,35253,34633,36436,34277,36554,37888,35070…	babo,Lim3,hiw,nerfin-1,dock,unc-104,Cdk5alpha,rdgC,Sra-1,Sulf1,Tbh,sim,Sema-1b,Rab5,RhoGAP93B,csw,shep,Nrk,CASK,Ace,gogo,CdGAPr,unc-5,Tsp86D,Sema-5c,comm,nos,slp2,Fas2,gish,CdsA,ena,HisCl1,Ptp99A,Cbl,qm,pros,klar,eya,CG32006,Liprin-alpha,Gli,gukh,CG32100,slp1,Apc,beat-IIIc,ens,RhoGAP100F,aop,Lar,kermit,so,mirr,CG3857,Nrt,brat,rap,jeb,spi,Ced-12,Drl-2,gcm,RN-tre,betaTub60D,CadN,hts,Abl,Sdc,neur,So…
	GO:0048592	eye morphogenesis	5.9e-18	-39.6713	2.08e-15	258	58	0.084058	690	10917	43825,43758,31292,41861,33392,38321,45278,43234,35259,35662,36445,42358,39441,32723,45922,42896,42210,31017,37185,42707,36295,35253,36848,43146,41704,31883,43656,35070,31364,32162,31229,35680,49701,43690,32039,33239,31290,32850,3772396,44856,44129,38961,36606,41363,38067,326198,33916,249072,36125,32724,39833,36771,41491,31802,39293,40383,38424,31391	sv,RhoGAP100F,kirre,Sra-1,aop,dos,csw,ro,Lar,so,Nrk,Ire1,mirr,B-H2,rap,crb,gl,sdk,sano,klg,jeb,spi,Syn2,boss,rdx,lz,tll,CadN,Fas2,fw,boi,didum,gish,chp,sev,Pph13,rst,Rip11,seq,ru,hbs,Cbl,phyl,pros,klar,Krn,eya,Liprin-alpha,stan,B-H1,aos,SP2353,svp,oc,Mob2,M6,sty,peb
	GO:0048731	system development	7.09e-18	-39.4872	2.31e-15	2188	231	0.334783	690	10917	35900,35184,38788,36876,35997,53437,50320,37007,43234,42496,33840,36445,42358,38168,40225,40143,32637,43633,34073,35266,42187,41704,42297,31883,43656,43736,36897,43321,31045,49701,31667,37201,31069,38863,40515,38961,37552,32743,43469,38816,41363,38067,249072,317817,38218,36544,34927,53563,43803,36176,39537,34646,33607,35037,42986,36609,43528,43758,34367,33392,37341,117407,35523,35378,35259,43023,…	babo,Lim3,Dscam2,unc-104,Mmp2,Sulf1,dpr12,Sema-1b,ro,RhoGAP93B,CG9098,Nrk,Ire1,rho,gogo,wnd,mthl1,tmod,CG14535,bsh,CG7156,rdx,nos,lz,tll,Ef1alpha100E,inaC,RpS10a,CG3703,gish,Dok,ena,CG11382,Ank2,nrm,Cbl,Liprin-gamma,RhoGAPp190,Ptp99A,qm,pros,klar,Liprin-alpha,CG32006,drpr,AGO1,Gli,gukh,Eph,metro,CG32137,crok,slp1,beat-IIIc,ssh,Oaz,Cad99C,RhoGAP100F,Ror,aop,CG11159,Tsp68C,mle,Dap160,Lar,dan,Unc-76…
	GO:0044707	single-multicellular organism process	7.34e-18	-39.4531	2.31e-15	3272	310	0.449275	690	10917	35184,32429,35832,39332,35997,37007,39617,43234,42496,33840,36445,32637,34073,41704,42297,43656,43736,43321,47746,49701,39999,37201,31069,31107,40515,38961,43469,249072,39673,317817,53563,36403,36176,39537,34646,33607,36609,43758,33392,37341,117407,35378,35259,31179,35977,35330,35197,38469,31017,5740176,39418,36295,41381,36436,43146,37888,42089,37230,31940,35680,31271,32039,31290,31071,39293,3242…	Lim3,hiw,mtt,Klp68D,Mmp2,Sema-1b,DCX-EMAP,ro,RhoGAP93B,CG9098,Nrk,mthl1,CG14535,rdx,nos,tll,Ef1alpha100E,RpS10a,Lk,gish,Eip75B,ena,CG11382,Nmdar2,nrm,Cbl,Ptp99A,Liprin-alpha,Z600,CG32006,gukh,CG42663,metro,CG32137,crok,slp1,Oaz,RhoGAP100F,aop,CG11159,Tsp68C,Dap160,Lar,Unc-76,brp,Cen,brat,scrt,sdk,CG34340,toe,jeb,dpr5,Drl-2,boss,betaTub60D,lute,hts,CG15312,didum,w,sev,rst,CG3638,Mob2,CG12398,robo3…
	GO:0051960	regulation of nervous system development	8.41e-18	-39.3174	2.51e-15	221	53	0.0768116	690	10917	39052,43825,32429,32158,36876,5740544,31248,33392,43234,45278,40715,35378,35259,42567,35197,53579,36526,31017,35253,34277,39717,36848,34681,33608,35070,40424,45821,31364,48973,37447,41085,32039,31075,34192,3772396,38863,46015,32743,37552,41363,249072,36125,317817,39833,38231,31802,39293,36176,37781,33607,38424,37633,42986	nwk,sv,hiw,cac,unc-104,futsch,sgg,aop,ro,csw,kat-60L1,Dap160,Lar,CASK,brat,Dip3,stj,sdk,spi,gcm,comm,Syn2,spict,slp2,CadN,Syn1,Abl,Fas2,Src64B,Sdc,neur,sev,DAAM,Sema-1a,seq,Ank2,tutl,RhoGAPp190,Liprin-gamma,pros,Liprin-alpha,stan,CG32006,aos,alpha-Spec,oc,Mob2,metro,TBPH,slp1,sty,PIP5K59B,ssh
	GO:0001745	compound eye morphogenesis	1.23e-17	-38.9342	3.51e-15	246	56	0.0811594	690	10917	43825,43758,31292,41861,33392,38321,45278,43234,35259,35662,36445,42358,39441,32723,45922,42896,42210,31017,37185,42707,36295,35253,36848,43146,41704,31883,35070,32162,31229,35680,49701,43690,32039,33239,31290,32850,3772396,44856,44129,38961,36606,41363,38067,326198,33916,249072,36125,32724,39833,36771,41491,31802,39293,40383,38424,31391	sv,RhoGAP100F,kirre,Sra-1,aop,dos,csw,ro,Lar,so,Nrk,Ire1,mirr,B-H2,rap,crb,gl,sdk,sano,klg,jeb,spi,Syn2,boss,rdx,lz,CadN,fw,boi,didum,gish,chp,sev,Pph13,rst,Rip11,seq,ru,hbs,Cbl,phyl,pros,klar,Krn,eya,Liprin-alpha,stan,B-H1,aos,SP2353,svp,oc,Mob2,M6,sty,peb
	GO:0030030	cell projection organization	2.45e-17	-38.2495	6.65e-15	643	99	0.143478	690	10917	35900,35184,44786,38788,33262,36876,34385,5740544,41861,53437,41612,37007,33418,42496,33840,36445,42358,38168,40225,40143,35267,36703,42896,34073,42187,37066,39717,42297,33608,31364,31045,53472,34702,42580,37201,38863,32743,37552,43469,41363,249072,317817,33916,33845,38755,34927,53563,43803,36176,39537,33607,37781,44642,35037,43825,43528,41997,43758,32071,33392,35523,35259,39873,35058,39441,40544…	babo,Lim3,nerfin-1,Dscam2,dock,unc-104,Cdk5alpha,futsch,Sra-1,Sulf1,sim,Sema-1b,Rab5,RhoGAP93B,CG9098,Nrk,Ire1,rho,gogo,wnd,CdGAPr,unc-5,crb,CG14535,CG7156,Sema-5c,comm,nos,slp2,Fas2,CG3703,Aplip1,CG5142,dnd,ena,Ank2,RhoGAPp190,Liprin-gamma,Ptp99A,pros,Liprin-alpha,CG32006,eya,mtm,tow,Gli,gukh,Eph,metro,CG32137,slp1,TBPH,Apc,beat-IIIc,sv,Cad99C,CG14883,RhoGAP100F,Kap3,aop,mle,Lar,Nrt,qua,mirr,Syt…
	GO:0007399	nervous system development	2.59e-17	-38.1904	6.75e-15	1524	177	0.256522	690	10917	35900,35184,38788,36876,53437,50320,37007,43234,42496,33840,36445,42358,38168,40225,40143,34073,35266,42187,42297,31883,43656,43736,43321,31045,49701,37201,38863,40515,38961,37552,32743,43469,38816,41363,38067,249072,317817,38218,36544,34927,53563,43803,36176,39537,33607,35037,42986,43758,34367,33392,35523,35378,35259,43023,31179,39873,38185,35197,32723,38469,31017,5740176,42150,36295,36436,43146…	babo,Lim3,Dscam2,unc-104,Sulf1,dpr12,Sema-1b,ro,RhoGAP93B,CG9098,Nrk,Ire1,rho,gogo,wnd,CG14535,bsh,CG7156,nos,lz,tll,Ef1alpha100E,RpS10a,CG3703,gish,ena,Ank2,nrm,Cbl,Liprin-gamma,RhoGAPp190,Ptp99A,qm,pros,klar,Liprin-alpha,CG32006,drpr,AGO1,Gli,gukh,Eph,metro,CG32137,slp1,beat-IIIc,ssh,RhoGAP100F,Ror,aop,mle,Dap160,Lar,dan,Unc-76,Nrt,CG12004,brat,B-H2,scrt,sdk,CG34340,Rim,jeb,Drl-2,boss,lute,beta…
	GO:0048812	neuron projection morphogenesis	3.45e-17	-37.9061	8.59e-15	527	87	0.126087	690	10917	35900,35184,44786,38788,33262,36876,34385,41861,53437,5740544,41612,37007,33418,42496,33840,36445,42358,38168,40225,40143,35267,36703,42896,34073,42187,37066,39717,42297,33608,31364,31045,53472,37201,38863,37552,43469,41363,33916,317817,249072,53563,43803,36176,39537,33607,37781,44642,35037,43825,41997,43758,33392,35523,35259,39873,39441,40544,35197,38469,5740176,36295,36436,34277,35070,37888,372…	babo,Lim3,nerfin-1,Dscam2,dock,unc-104,Cdk5alpha,Sra-1,Sulf1,futsch,sim,Sema-1b,Rab5,RhoGAP93B,CG9098,Nrk,Ire1,rho,gogo,wnd,CdGAPr,unc-5,crb,CG14535,CG7156,Sema-5c,comm,nos,slp2,Fas2,CG3703,Aplip1,ena,Ank2,Liprin-gamma,Ptp99A,pros,eya,CG32006,Liprin-alpha,gukh,Eph,metro,CG32137,slp1,TBPH,Apc,beat-IIIc,sv,CG14883,RhoGAP100F,aop,mle,Lar,Nrt,mirr,Syt14,brat,scrt,CG34340,jeb,Drl-2,gcm,CadN,betaTub60D…
	GO:0031175	neuron projection development	4.03e-17	-37.7509	9.63e-15	538	88	0.127536	690	10917	35900,35184,44786,38788,33262,36876,34385,5740544,41861,53437,41612,37007,33418,42496,33840,36445,42358,38168,40225,35267,40143,36703,42896,34073,42187,37066,39717,42297,33608,31364,31045,53472,37201,38863,37552,32743,43469,41363,317817,249072,33916,53563,43803,36176,39537,33607,37781,44642,35037,43825,41997,43758,33392,35523,35259,39441,39873,40544,35197,38469,5740176,36295,36436,34277,37888,350…	babo,Lim3,nerfin-1,Dscam2,dock,unc-104,Cdk5alpha,futsch,Sra-1,Sulf1,sim,Sema-1b,Rab5,RhoGAP93B,CG9098,Nrk,Ire1,rho,gogo,CdGAPr,wnd,unc-5,crb,CG14535,CG7156,Sema-5c,comm,nos,slp2,Fas2,CG3703,Aplip1,ena,Ank2,Liprin-gamma,RhoGAPp190,Ptp99A,pros,CG32006,Liprin-alpha,eya,gukh,Eph,metro,CG32137,slp1,TBPH,Apc,beat-IIIc,sv,CG14883,RhoGAP100F,aop,mle,Lar,mirr,Nrt,Syt14,brat,scrt,CG34340,jeb,Drl-2,gcm,beta…
	GO:0048858	cell projection morphogenesis	4.89e-17	-37.5561	1.13e-14	579	92	0.133333	690	10917	35900,35184,44786,38788,33262,36876,34385,41861,53437,5740544,41612,37007,33418,42496,33840,36445,42358,38168,40225,40143,35267,36703,42896,34073,42187,37066,39717,42297,33608,31364,31045,53472,34702,42580,37201,38863,37552,43469,41363,33916,317817,249072,53563,43803,36176,39537,33607,37781,44642,35037,43825,41997,32071,43758,33392,35523,35259,39873,39441,40544,35197,38469,5740176,36295,36436,342…	babo,Lim3,nerfin-1,Dscam2,dock,unc-104,Cdk5alpha,Sra-1,Sulf1,futsch,sim,Sema-1b,Rab5,RhoGAP93B,CG9098,Nrk,Ire1,rho,gogo,wnd,CdGAPr,unc-5,crb,CG14535,CG7156,Sema-5c,comm,nos,slp2,Fas2,CG3703,Aplip1,CG5142,dnd,ena,Ank2,Liprin-gamma,Ptp99A,pros,eya,CG32006,Liprin-alpha,gukh,Eph,metro,CG32137,slp1,TBPH,Apc,beat-IIIc,sv,CG14883,Kap3,RhoGAP100F,aop,mle,Lar,Nrt,mirr,Syt14,brat,scrt,CG34340,jeb,Drl-2,gcm…
	GO:0032990	cell part morphogenesis	8.63e-17	-36.9887	1.91e-14	584	92	0.133333	690	10917	35900,35184,44786,38788,33262,36876,34385,41861,53437,5740544,41612,37007,33418,42496,33840,36445,42358,38168,40225,40143,35267,36703,42896,34073,42187,37066,39717,42297,33608,31364,31045,53472,34702,42580,37201,38863,37552,43469,41363,33916,317817,249072,53563,43803,36176,39537,33607,37781,44642,35037,43825,41997,32071,43758,33392,35523,35259,39873,39441,40544,35197,38469,5740176,36295,36436,342…	babo,Lim3,nerfin-1,Dscam2,dock,unc-104,Cdk5alpha,Sra-1,Sulf1,futsch,sim,Sema-1b,Rab5,RhoGAP93B,CG9098,Nrk,Ire1,rho,gogo,wnd,CdGAPr,unc-5,crb,CG14535,CG7156,Sema-5c,comm,nos,slp2,Fas2,CG3703,Aplip1,CG5142,dnd,ena,Ank2,Liprin-gamma,Ptp99A,pros,eya,CG32006,Liprin-alpha,gukh,Eph,metro,CG32137,slp1,TBPH,Apc,beat-IIIc,sv,CG14883,Kap3,RhoGAP100F,aop,mle,Lar,Nrt,mirr,Syt14,brat,scrt,CG34340,jeb,Drl-2,gcm…
	GO:0042330	taxis	1.24e-16	-36.6269	2.65e-14	325	64	0.0927536	690	10917	35900,35184,44786,33262,36876,34385,40224,41861,53437,41612,37007,42496,38605,36445,41625,40225,35267,36703,37066,39717,33608,31364,43950,37201,41426,43469,41363,33916,317817,249072,53563,39400,33607,44642,35037,43758,35259,2768908,39873,39441,35197,36295,34277,36436,37888,35070,45821,37230,37447,44275,31271,3772396,34192,44355,46015,45976,36125,39833,42025,38231,37886,41491,40383,33314	babo,Lim3,nerfin-1,dock,unc-104,Cdk5alpha,rdgC,Sra-1,Sulf1,sim,Sema-1b,RhoGAP93B,shep,Nrk,Ace,gogo,CdGAPr,unc-5,Sema-5c,comm,slp2,Fas2,CdsA,ena,HisCl1,Ptp99A,pros,eya,CG32006,Liprin-alpha,gukh,CG32100,slp1,Apc,beat-IIIc,RhoGAP100F,Lar,CG3857,Nrt,mirr,brat,jeb,gcm,Drl-2,betaTub60D,CadN,Abl,hts,Sdc,SoxN,w,seq,Sema-1a,drl,tutl,retn,stan,aos,Fas1,alpha-Spec,nvy,svp,M6,robo3
	GO:0050896	response to stimulus	1.38e-16	-36.5227	2.84e-14	2441	246	0.356522	690	10917	37614,35900,35184,32429,318005,35832,36447,36876,35997,53437,43683,31718,35049,39617,37007,42496,32619,33840,38605,36445,42358,38168,41625,40143,32637,40225,41190,35646,32033,31883,43656,36897,41616,47746,49701,5740204,39999,38504,37824,31667,43317,37201,38863,41426,31107,32743,43469,38961,34300,41363,35620,5740362,249072,317817,33845,38218,36544,246456,53563,43803,33607,35037,42733,33520,43528,4…	CG42260,babo,Lim3,hiw,sphinx1,mtt,GLaz,unc-104,Mmp2,Sulf1,stops,Tbh,CG6639,DCX-EMAP,Sema-1b,RhoGAP93B,para,CG9098,shep,Nrk,Ire1,rho,Ace,wnd,mthl1,gogo,Rpt3R,Gadd45,CG42339,lz,tll,inaC,2mit,Lk,gish,clos,Eip75B,tipE,Pask,Dok,Tusp,ena,Ank2,HisCl1,Nmdar2,RhoGAPp190,Ptp99A,Cbl,IP3K1,pros,Tsp42Ej,CG34384,Liprin-alpha,CG32006,mtm,drpr,AGO1,CG30098,gukh,Eph,slp1,beat-IIIc,CG13830,cnir,Cad99C,RhoGAP100F,P…
	GO:0006928	cellular component movement	1.51e-16	-36.4294	3.01e-14	589	92	0.133333	690	10917	35900,35184,44786,39332,33262,36876,34385,35757,5740544,41861,53437,41612,37007,33418,42496,45278,36445,42567,40225,32637,35267,36703,41310,34073,37066,39717,42297,33608,31364,36897,49701,53472,37201,38961,43469,43905,38816,41363,38067,249072,317817,33916,34927,53563,39445,33607,44642,35037,43758,32071,36718,33392,35259,35662,31179,39873,39441,35197,45922,36295,35253,34277,34633,36436,36554,35070…	babo,Lim3,nerfin-1,Klp68D,dock,unc-104,Cdk5alpha,CG14763,futsch,Sra-1,Sulf1,sim,Sema-1b,Rab5,RhoGAP93B,csw,Nrk,CASK,gogo,mthl1,CdGAPr,unc-5,Tsp86D,CG14535,Sema-5c,comm,nos,slp2,Fas2,inaC,gish,Aplip1,ena,Cbl,Ptp99A,syd,qm,pros,klar,Liprin-alpha,CG32006,eya,Gli,gukh,Klc,slp1,Apc,beat-IIIc,RhoGAP100F,Kap3,Khc-73,aop,Lar,so,Unc-76,Nrt,mirr,brat,rap,jeb,spi,gcm,Ced-12,Drl-2,RN-tre,CadN,betaTub60D,Abl,…
	GO:0007411	axon guidance	2.17e-16	-36.0667	4.19e-14	245	54	0.0782609	690	10917	35900,35184,44786,43758,33262,36876,34385,41861,53437,41612,37007,42496,35259,36445,39441,39873,35267,40225,36703,35197,36295,34277,39717,37066,36436,33608,35070,37888,45821,31364,37230,37447,44275,34192,3772396,37201,44355,46015,43469,45976,41363,36125,33916,317817,249072,42025,39833,37886,38231,53563,33607,44642,35037,33314	babo,Lim3,nerfin-1,RhoGAP100F,dock,unc-104,Cdk5alpha,Sra-1,Sulf1,sim,Sema-1b,RhoGAP93B,Lar,Nrk,mirr,Nrt,CdGAPr,gogo,unc-5,brat,jeb,gcm,comm,Sema-5c,Drl-2,slp2,CadN,betaTub60D,Abl,Fas2,hts,Sdc,SoxN,Sema-1a,seq,ena,drl,tutl,Ptp99A,retn,pros,stan,eya,CG32006,Liprin-alpha,Fas1,aos,nvy,alpha-Spec,gukh,slp1,Apc,beat-IIIc,robo3
	GO:0007423	sensory organ development	4.56e-16	-35.3233	8.53e-14	452	77	0.111594	690	10917	31292,5740544,41861,31248,43234,45278,36445,42358,36260,42896,42707,41704,31883,43656,31364,49701,43690,33239,43087,32850,37201,38961,35077,36606,41363,38067,33916,249072,32724,42986,43825,43758,39619,33392,38321,43023,35259,35662,39441,32723,45922,37185,31017,42210,36295,39418,35253,43146,36848,44849,35070,45821,39620,41085,32162,31229,35680,32039,31290,3772396,44856,44129,32846,326198,36125,398…	kirre,futsch,Sra-1,sgg,ro,csw,Nrk,Ire1,Sobp,crb,klg,rdx,lz,tll,Fas2,gish,chp,Pph13,msi,Rip11,ena,Cbl,rdo,phyl,pros,klar,eya,Liprin-alpha,B-H1,ssh,sv,RhoGAP100F,Tom,aop,dos,dan,Lar,so,mirr,B-H2,rap,sano,sdk,gl,jeb,toe,spi,boss,Syn2,pnr,CadN,Abl,Brd,neur,fw,boi,didum,sev,rst,seq,ru,hbs,Bx,Krn,stan,aos,SP2353,nvy,mam,svp,oc,Hem,Mob2,M6,sty,peb,Pka-C1
	GO:0048667	cell morphogenesis involved in neuron differentiation	5.8e-16	-35.0842	1.05e-13	435	75	0.108696	690	10917	35900,35184,44786,33262,36876,34385,41861,53437,5740544,41612,37007,33418,42496,36445,42358,38168,40225,40143,35267,36703,42896,37066,39717,42297,33608,31364,37201,38863,37552,43469,41363,33916,317817,249072,53563,43803,33607,44642,35037,43825,43758,33392,35523,35259,39873,39441,35197,38469,5740176,36295,36436,34277,35070,37888,37230,45821,37447,44275,31290,34192,3772396,43826,44355,46015,34280,4…	babo,Lim3,nerfin-1,dock,unc-104,Cdk5alpha,Sra-1,Sulf1,futsch,sim,Sema-1b,Rab5,RhoGAP93B,Nrk,Ire1,rho,gogo,wnd,CdGAPr,unc-5,crb,Sema-5c,comm,nos,slp2,Fas2,ena,Ank2,Liprin-gamma,Ptp99A,pros,eya,CG32006,Liprin-alpha,gukh,Eph,slp1,Apc,beat-IIIc,sv,RhoGAP100F,aop,mle,Lar,Nrt,mirr,brat,scrt,CG34340,jeb,Drl-2,gcm,CadN,betaTub60D,hts,Abl,Sdc,SoxN,rst,Sema-1a,seq,Actbeta,drl,tutl,gcm2,retn,stan,Fas1,aos,n…
	GO:0097485	neuron projection guidance	9.45e-16	-34.5951	1.66e-13	253	54	0.0782609	690	10917	35900,35184,44786,43758,33262,36876,34385,41861,53437,41612,37007,42496,35259,36445,39441,39873,40225,35267,36703,35197,36295,34277,37066,39717,36436,33608,35070,37888,31364,45821,37230,37447,44275,34192,3772396,37201,44355,43469,46015,45976,41363,36125,249072,317817,33916,42025,39833,37886,53563,38231,33607,44642,35037,33314	babo,Lim3,nerfin-1,RhoGAP100F,dock,unc-104,Cdk5alpha,Sra-1,Sulf1,sim,Sema-1b,RhoGAP93B,Lar,Nrk,mirr,Nrt,gogo,CdGAPr,unc-5,brat,jeb,gcm,Sema-5c,comm,Drl-2,slp2,CadN,betaTub60D,Fas2,Abl,hts,Sdc,SoxN,Sema-1a,seq,ena,drl,Ptp99A,tutl,retn,pros,stan,Liprin-alpha,CG32006,eya,Fas1,aos,nvy,gukh,alpha-Spec,slp1,Apc,beat-IIIc,robo3
	GO:0050793	regulation of developmental process	1.71e-15	-34.0034	2.92e-13	581	89	0.128986	690	10917	32429,34170,31292,32158,36876,45840,5740544,41861,31248,43234,45278,42567,53579,42896,39717,34681,42297,31883,44543,33608,40424,38198,31364,32195,49701,39999,43087,31667,37201,38863,32743,37552,41363,33916,317817,249072,37345,36544,36176,37781,33607,44642,42986,37633,36632,39052,43825,33392,40715,35378,35259,40205,35197,36526,34648,31017,34069,35253,36848,34277,35070,45821,33473,37447,41085,48973…	hiw,Akap200,kirre,cac,unc-104,cpo,futsch,Sra-1,sgg,ro,csw,CASK,Dip3,crb,comm,spict,nos,lz,enc,slp2,Syn1,Bgb,Fas2,Rab40,gish,Eip75B,msi,Dok,ena,Ank2,RhoGAPp190,Liprin-gamma,pros,eya,CG32006,Liprin-alpha,exu,AGO1,metro,TBPH,slp1,Apc,ssh,PIP5K59B,mspo,nwk,sv,aop,kat-60L1,Dap160,Lar,CG42674,brat,stj,aret,sdk,CG7115,spi,Syn2,gcm,CadN,Abl,Syt1,Sdc,neur,Src64B,didum,sev,DAAM,dyl,rst,seq,Sema-1a,Fhos,hbs…
	GO:0001751	compound eye photoreceptor cell differentiation	2.73e-15	-33.5356	4.53e-13	144	39	0.0565217	690	10917	###############################################################################################################################################################################################################################################################	RhoGAP100F,aop,dos,csw,ro,Lar,Nrk,Ire1,B-H2,crb,gl,klg,jeb,spi,Syn2,boss,lz,CadN,boi,didum,sev,chp,Pph13,seq,Rip11,ru,hbs,Cbl,phyl,pros,klar,Liprin-alpha,stan,eya,B-H1,SP2353,svp,oc,Mob2
	GO:0000902	cell morphogenesis	3.32e-15	-33.3382	5.37e-13	670	97	0.14058	690	10917	35900,35184,44786,38788,33262,36876,34385,41861,53437,5740544,31248,41612,37007,33418,42496,33840,36445,42358,38168,40225,40143,35267,36703,42896,34073,42187,37066,39717,42297,33608,31364,31045,53472,34702,42580,31667,37201,38863,37552,43469,41363,33916,317817,249072,53563,43803,36176,39537,33607,37781,44642,35037,43825,41997,32071,43758,33392,35523,35259,39873,39441,40544,35197,38469,5740176,362…	babo,Lim3,nerfin-1,Dscam2,dock,unc-104,Cdk5alpha,Sra-1,Sulf1,futsch,sgg,sim,Sema-1b,Rab5,RhoGAP93B,CG9098,Nrk,Ire1,rho,gogo,wnd,CdGAPr,unc-5,crb,CG14535,CG7156,Sema-5c,comm,nos,slp2,Fas2,CG3703,Aplip1,CG5142,dnd,Dok,ena,Ank2,Liprin-gamma,Ptp99A,pros,eya,CG32006,Liprin-alpha,gukh,Eph,metro,CG32137,slp1,TBPH,Apc,beat-IIIc,sv,CG14883,Kap3,RhoGAP100F,aop,mle,Lar,Nrt,mirr,Syt14,brat,scrt,CG34340,jeb,D…
	GO:2000026	regulation of multicellular organismal development	4.56e-15	-33.0222	7.17e-13	404	70	0.101449	690	10917	32429,34170,31292,32158,36876,5740544,31248,43234,45278,42567,53579,42896,39717,34681,44543,31883,33608,40424,31364,49701,39999,31667,38863,32743,37552,41363,317817,249072,37345,36176,37781,33607,44642,37633,42986,43825,39052,33392,40715,35378,35259,35197,36526,31017,35253,36848,34277,35070,45821,33473,37447,41085,48973,35680,31075,32039,31290,38531,3772396,34192,44129,46015,36125,39833,38231,318…	hiw,Akap200,kirre,cac,unc-104,futsch,sgg,ro,csw,CASK,Dip3,crb,comm,spict,enc,lz,slp2,Syn1,Fas2,gish,Eip75B,Dok,Ank2,RhoGAPp190,Liprin-gamma,pros,CG32006,Liprin-alpha,exu,metro,TBPH,slp1,Apc,PIP5K59B,ssh,sv,nwk,aop,kat-60L1,Dap160,Lar,brat,stj,sdk,spi,Syn2,gcm,CadN,Abl,Syt1,Sdc,neur,Src64B,didum,DAAM,sev,rst,dyl,seq,Sema-1a,hbs,tutl,stan,aos,alpha-Spec,oc,Mob2,Mlf,sty,Pka-C1
	GO:0000904	cell morphogenesis involved in differentiation	4.73e-15	-32.9842	7.26e-13	471	77	0.111594	690	10917	35900,35184,44786,33262,36876,34385,41861,53437,5740544,31248,41612,37007,33418,42496,36445,42358,38168,40225,40143,35267,36703,42896,37066,39717,42297,33608,31364,37201,38863,37552,43469,41363,33916,317817,249072,53563,43803,33607,44642,35037,43825,43758,33392,35523,35259,39873,39441,35197,38469,5740176,36295,36436,34277,35070,37888,37230,45821,37447,44275,38531,31290,34192,3772396,43826,44355,4…	babo,Lim3,nerfin-1,dock,unc-104,Cdk5alpha,Sra-1,Sulf1,futsch,sgg,sim,Sema-1b,Rab5,RhoGAP93B,Nrk,Ire1,rho,gogo,wnd,CdGAPr,unc-5,crb,Sema-5c,comm,nos,slp2,Fas2,ena,Ank2,Liprin-gamma,Ptp99A,pros,eya,CG32006,Liprin-alpha,gukh,Eph,slp1,Apc,beat-IIIc,sv,RhoGAP100F,aop,mle,Lar,Nrt,mirr,brat,scrt,CG34340,jeb,Drl-2,gcm,CadN,betaTub60D,hts,Abl,Sdc,SoxN,dyl,rst,Sema-1a,seq,Actbeta,drl,tutl,gcm2,retn,stan,Fa…
	GO:0001754	eye photoreceptor cell differentiation	5.78e-15	-32.7845	8.64e-13	147	39	0.0565217	690	10917	###############################################################################################################################################################################################################################################################	RhoGAP100F,aop,dos,csw,ro,Lar,Nrk,Ire1,B-H2,crb,gl,klg,jeb,spi,Syn2,boss,lz,CadN,boi,didum,sev,chp,Pph13,seq,Rip11,ru,hbs,Cbl,phyl,pros,klar,Liprin-alpha,stan,eya,B-H1,SP2353,svp,oc,Mob2
	GO:0006935	chemotaxis	8.94e-15	-32.3479	1.3e-12	266	54	0.0782609	690	10917	35900,35184,43758,44786,33262,36876,34385,41861,53437,41612,37007,42496,35259,36445,39441,39873,40225,35267,36703,35197,36295,37066,36436,34277,39717,33608,35070,37888,37230,45821,31364,37447,44275,34192,3772396,37201,46015,44355,43469,45976,41363,33916,36125,317817,249072,39833,42025,37886,38231,53563,33607,44642,35037,33314	babo,Lim3,RhoGAP100F,nerfin-1,dock,unc-104,Cdk5alpha,Sra-1,Sulf1,sim,Sema-1b,RhoGAP93B,Lar,Nrk,mirr,Nrt,gogo,CdGAPr,unc-5,brat,jeb,Sema-5c,Drl-2,gcm,comm,slp2,CadN,betaTub60D,hts,Abl,Fas2,Sdc,SoxN,Sema-1a,seq,ena,tutl,drl,Ptp99A,retn,pros,eya,stan,CG32006,Liprin-alpha,aos,Fas1,nvy,alpha-Spec,gukh,slp1,Apc,beat-IIIc,robo3
	GO:0009887	organ morphogenesis	9.64e-15	-32.2723	1.37e-12	713	100	0.144928	690	10917	35900,31292,35997,41861,41423,31248,33418,45278,43234,36445,42358,35698,38168,32637,36703,43633,42896,42707,37066,34681,41704,31883,43656,31364,49701,43950,43690,33239,32850,31667,37201,31069,38961,32754,36964,36606,41363,38067,33916,249072,32724,38755,34927,33607,43825,43758,39619,33392,38321,35259,35662,35058,39441,32723,40205,32999,45922,31017,34648,37185,42210,36295,35253,44849,36848,43146,35…	babo,kirre,Mmp2,Sra-1,l(3)neo38,sgg,Rab5,csw,ro,Nrk,Ire1,CG43340,rho,mthl1,unc-5,tmod,crb,klg,Sema-5c,spict,rdx,lz,tll,Fas2,gish,CdsA,chp,Pph13,Rip11,Dok,ena,CG11382,Cbl,CG42684,CG14478,phyl,pros,klar,eya,Liprin-alpha,B-H1,tow,Gli,slp1,sv,RhoGAP100F,Tom,aop,dos,Lar,so,qua,mirr,B-H2,CG42674,amn,rap,sdk,aret,sano,gl,jeb,spi,pnr,Syn2,boss,CadN,Brd,neur,fw,CG15312,boi,didum,Gbeta13F,sev,step,rst,Sema…
	GO:0032501	multicellular organismal process	1.04e-14	-32.1935	1.45e-12	3708	329	0.476812	690	10917	35184,32429,318005,35832,39332,35997,39617,37007,43234,42496,32619,33840,36445,32637,34073,41704,42297,43656,43736,43321,47746,49701,39999,38504,37201,31069,31107,40515,43469,38961,39673,249072,317817,53563,36403,36176,39537,34646,33607,40126,36609,43758,33392,37341,117407,35378,35259,31179,35977,35330,35197,38469,5740176,31017,39418,36295,36436,41381,43146,37888,42089,37230,31940,35680,31271,320…	Lim3,hiw,sphinx1,mtt,Klp68D,Mmp2,DCX-EMAP,Sema-1b,ro,RhoGAP93B,para,CG9098,Nrk,mthl1,CG14535,rdx,nos,tll,Ef1alpha100E,RpS10a,Lk,gish,Eip75B,tipE,ena,CG11382,Nmdar2,nrm,Ptp99A,Cbl,Z600,Liprin-alpha,CG32006,gukh,CG42663,metro,CG32137,crok,slp1,Rcd7,Oaz,RhoGAP100F,aop,CG11159,Tsp68C,Dap160,Lar,Unc-76,brp,Cen,brat,scrt,CG34340,sdk,toe,jeb,Drl-2,dpr5,boss,betaTub60D,lute,hts,CG15312,didum,w,sev,rst,CG…
	GO:0046530	photoreceptor cell differentiation	1.34e-14	-31.9451	1.82e-12	165	41	0.0594203	690	10917	###############################################################################################################################################################################################################################################################	RhoGAP100F,aop,ro,dos,csw,Lar,Nrk,Ire1,B-H2,crb,gl,klg,jeb,spi,boss,Syn2,lz,CadN,boi,didum,chp,sev,Pph13,seq,Rip11,ru,hbs,sdt,Cbl,phyl,pros,klar,stan,Liprin-alpha,eya,B-H1,SP2353,svp,oc,Mob2,peb
	GO:0007275	multicellular organismal development	1.51e-14	-31.8236	2.01e-12	2741	261	0.378261	690	10917	35184,35997,37007,43234,42496,33840,36445,32637,34073,41704,42297,43656,43736,43321,49701,37201,31069,40515,38961,43469,249072,39673,317817,53563,36403,36176,39537,34646,33607,36609,43758,33392,37341,117407,35378,35259,31179,35330,35197,38469,5740176,31017,39418,36295,36436,43146,42089,37888,37230,31940,35680,32039,31290,31071,39293,32422,33314,31391,42672,34284,44786,31292,43215,5740544,41423,31…	Lim3,Mmp2,Sema-1b,ro,RhoGAP93B,CG9098,Nrk,mthl1,CG14535,rdx,nos,tll,Ef1alpha100E,RpS10a,gish,ena,CG11382,nrm,Cbl,Ptp99A,Liprin-alpha,Z600,CG32006,gukh,CG42663,metro,CG32137,crok,slp1,Oaz,RhoGAP100F,aop,CG11159,Tsp68C,Dap160,Lar,Unc-76,Cen,brat,scrt,CG34340,sdk,toe,jeb,Drl-2,boss,lute,betaTub60D,hts,CG15312,didum,sev,rst,CG3638,Mob2,CG12398,robo3,peb,loco,Pka-C1,nerfin-1,kirre,amon,futsch,l(3)neo3…
	GO:0022008	neurogenesis	4.97e-14	-30.6323	6.46e-12	1370	155	0.224638	690	10917	35900,35184,38788,36876,53437,50320,37007,43234,42496,33840,36445,42358,38168,40225,40143,35266,34073,42187,42297,31883,43656,43736,43321,31045,49701,37201,38863,40515,38961,37552,32743,43469,38816,41363,38067,317817,249072,38218,34927,53563,43803,36176,39537,33607,35037,42986,43758,33392,35523,35259,35378,39873,31179,38185,35197,32723,38469,5740176,31017,36295,42150,43146,36436,42089,37888,37230…	babo,Lim3,Dscam2,unc-104,Sulf1,dpr12,Sema-1b,ro,RhoGAP93B,CG9098,Nrk,Ire1,rho,gogo,wnd,bsh,CG14535,CG7156,nos,lz,tll,Ef1alpha100E,RpS10a,CG3703,gish,ena,Ank2,nrm,Cbl,Liprin-gamma,RhoGAPp190,Ptp99A,qm,pros,klar,CG32006,Liprin-alpha,drpr,Gli,gukh,Eph,metro,CG32137,slp1,beat-IIIc,ssh,RhoGAP100F,aop,mle,Lar,Dap160,Nrt,Unc-76,CG12004,brat,B-H2,scrt,CG34340,sdk,jeb,Rim,boss,Drl-2,lute,betaTub60D,hts,ne…
	GO:0007268	synaptic transmission	7.89e-14	-30.1706	1e-11	306	57	0.0826087	690	10917	39052,32429,43806,32158,36876,45840,40876,36718,5740544,41861,31718,31248,43783,33418,39630,35378,32619,36127,42567,39485,40544,41625,35977,40143,47091,35197,36526,42150,36848,34681,41938,40424,41247,45821,31364,33473,64877,48973,37447,53472,38863,42646,37552,32290,36125,249072,38231,4379834,41701,41491,48971,39293,49968,36176,37781,37633,44317	nwk,hiw,CG9935,cac,unc-104,cpo,Syt4,Khc-73,futsch,Sra-1,Tbh,sgg,Syt7,Rab5,Sytbeta,Dap160,para,Rab3,CASK,Syx13,Syt14,Ace,brp,wnd,comt,brat,stj,Rim,Syn2,spict,Sap47,Syn1,Syn,Abl,Fas2,Syt1,cpx,Src64B,Sdc,Aplip1,Ank2,Nrx-1,Liprin-gamma,Syt12,stan,Liprin-alpha,alpha-Spec,stnB,Ipp,svp,Atpalpha,Mob2,Caps,metro,TBPH,PIP5K59B,CanB
	GO:0050808	synapse organization	1.76e-13	-29.3667	2.2e-11	112	32	0.0463768	690	10917	4.37583e+162	RhoGAP100F,hiw,lbm,unc-104,Sema-1a,futsch,Ank2,sgg,Nrx-1,Dap160,Lar,Rab3,sff,pros,repo,brp,Liprin-alpha,CG34127,Appl,Gli,AGO1,stj,Prosap,alpha-Spec,jeb,Atpalpha,comm,Hem,cmpy,TBPH,Fas2,cpx
	GO:0048513	organ development	1.82e-13	-29.3359	2.22e-11	1244	143	0.207246	690	10917	35900,35997,43234,36445,42358,38168,32637,43633,35266,41704,31883,43656,36897,49701,31667,37201,31069,38961,32743,38816,41363,38067,249072,38218,34927,43803,33607,42986,43528,43758,33392,117407,37341,43023,35259,35197,32723,34648,37185,31017,5740176,39418,36295,36436,43146,37888,39620,41085,31940,35680,32039,35425,31290,3772396,34192,34280,31071,44936,326198,41217,39583,36771,36555,41491,31802,39…	babo,Mmp2,ro,Nrk,Ire1,rho,mthl1,tmod,bsh,rdx,lz,tll,inaC,gish,Dok,ena,CG11382,Cbl,RhoGAPp190,qm,pros,klar,Liprin-alpha,drpr,Gli,Eph,slp1,ssh,Cad99C,RhoGAP100F,aop,Tsp68C,CG11159,dan,Lar,brat,B-H2,aret,sano,sdk,CG34340,toe,jeb,Drl-2,boss,betaTub60D,Brd,neur,CG15312,didum,sev,step,rst,seq,Sema-1a,gcm2,CG3638,Eip93F,Krn,Glut4EF,bbg,SP2353,mam,svp,oc,Mob2,Hem,robo3,peb,loco,Pka-C1,Akap200,kirre,Sra-1…
	GO:0042051	compound eye photoreceptor development	2.26e-13	-29.1179	2.7e-11	81	27	0.0391304	690	10917	3.56804e+137	didum,RhoGAP100F,chp,sev,Pph13,Rip11,seq,aop,Lar,Nrk,phyl,Ire1,klar,eya,Liprin-alpha,stan,SP2353,crb,gl,jeb,oc,spi,Syn2,boss,Mob2,lz,CadN
	GO:0042462	eye photoreceptor cell development	3.17e-13	-28.779	3.72e-11	82	27	0.0391304	690	10917	3.56804e+137	didum,RhoGAP100F,chp,sev,Pph13,Rip11,seq,aop,Lar,Nrk,phyl,Ire1,klar,eya,Liprin-alpha,stan,SP2353,crb,gl,jeb,oc,spi,Syn2,boss,Mob2,lz,CadN
	GO:0032989	cellular component morphogenesis	5.71e-13	-28.1918	6.56e-11	782	102	0.147826	690	10917	35900,35184,44786,38788,33262,36876,34385,41861,53437,5740544,31248,41612,37007,33418,42496,33840,36445,42358,38168,40225,40143,35267,36703,42896,34073,42187,37066,39717,42297,33608,31364,31045,53472,5740204,38998,34702,42580,31667,37201,38863,37552,43469,41363,33916,317817,249072,53563,43803,39445,36176,39537,33607,37781,44642,35037,43825,41997,43528,32071,43758,33392,35523,35259,39873,39441,405…	babo,Lim3,nerfin-1,Dscam2,dock,unc-104,Cdk5alpha,Sra-1,Sulf1,futsch,sgg,sim,Sema-1b,Rab5,RhoGAP93B,CG9098,Nrk,Ire1,rho,gogo,wnd,CdGAPr,unc-5,crb,CG14535,CG7156,Sema-5c,comm,nos,slp2,Fas2,CG3703,Aplip1,clos,Cp18,CG5142,dnd,Dok,ena,Ank2,Liprin-gamma,Ptp99A,pros,eya,CG32006,Liprin-alpha,gukh,Eph,Klc,metro,CG32137,slp1,TBPH,Apc,beat-IIIc,sv,CG14883,Cad99C,Kap3,RhoGAP100F,aop,mle,Lar,Nrt,mirr,Syt14,br…
	GO:0042461	photoreceptor cell development	6.82e-13	-28.0133	7.7e-11	97	29	0.042029	690	10917	3.56804e+147	didum,RhoGAP100F,chp,sev,Pph13,Rip11,seq,aop,sdt,Lar,Nrk,phyl,Ire1,klar,Liprin-alpha,stan,eya,SP2353,crb,gl,oc,jeb,spi,boss,Mob2,Syn2,lz,CadN,peb
	GO:0007165	signal transduction	1.07e-12	-27.5642	1.18e-10	938	115	0.166667	690	10917	37614,35900,32429,35832,32158,32157,33262,34385,32551,40224,43683,31718,31248,41612,39617,33418,45278,33840,36127,36445,42358,38168,32637,35267,32674,36703,35646,31883,43656,34015,36897,47746,32195,5740204,49701,53472,43950,39999,37824,41398,31667,42580,43317,38863,31107,35041,38961,32743,32754,36606,5740362,38057,34840,43803,318046,37099,3885573,42733,33520,41203,38209,33374,43528,43758,39063,34…	CG42260,babo,hiw,mtt,cac,CG10362,dock,Cdk5alpha,CycD,rdgC,stops,Tbh,sgg,sim,DCX-EMAP,Rab5,csw,CG9098,Rab3,Nrk,Ire1,rho,mthl1,CdGAPr,RSG7,unc-5,Gadd45,lz,tll,CG5160,inaC,Lk,Rab40,clos,gish,Aplip1,CdsA,Eip75B,Pask,Csk,Dok,dnd,Tusp,Ank2,Nmdar2,Lrch,Cbl,RhoGAPp190,CG42684,phyl,CG34384,mthl10,Rab14,Eph,mthl14,IM23,Octbeta3R,CG13830,cnir,CG8500,RabX5,Npc2a,Cad99C,RhoGAP100F,PGRP-LC,Ror,Tom,CG42450,aop,…
	GO:0044767	single-organism developmental process	1.37e-12	-27.3148	1.49e-10	3199	286	0.414493	690	10917	35184,35997,37007,43234,42496,33840,36445,32637,34073,41704,42297,43656,43736,43321,49701,39999,37201,31069,40515,38961,43469,249072,39673,317817,53563,36403,36176,39537,34646,33607,36609,43758,33392,37341,117407,35378,35259,31179,35330,35197,38469,5740176,31017,39418,36295,36436,43146,42089,37888,37230,31940,35680,31271,32039,31290,31071,39293,32422,33314,31391,42672,34284,44786,31292,43215,5740…	Lim3,Mmp2,Sema-1b,ro,RhoGAP93B,CG9098,Nrk,mthl1,CG14535,rdx,nos,tll,Ef1alpha100E,RpS10a,gish,Eip75B,ena,CG11382,nrm,Cbl,Ptp99A,Liprin-alpha,Z600,CG32006,gukh,CG42663,metro,CG32137,crok,slp1,Oaz,RhoGAP100F,aop,CG11159,Tsp68C,Dap160,Lar,Unc-76,Cen,brat,scrt,CG34340,sdk,toe,jeb,Drl-2,boss,lute,betaTub60D,hts,CG15312,didum,w,sev,rst,CG3638,Mob2,CG12398,robo3,peb,loco,Pka-C1,nerfin-1,kirre,amon,futsch…
	GO:0065008	regulation of biological quality	1.85e-12	-27.0174	1.97e-10	934	114	0.165217	690	10917	32429,31456,43806,32158,36876,43215,5740544,40224,41861,31718,31248,32418,43783,33418,39630,36127,36445,42567,38168,3354941,41625,40143,47091,42896,32420,41704,34681,40424,41938,31364,31245,64877,47746,39706,32195,53472,41398,31667,37201,38863,32743,37552,32683,32290,38067,249072,43442,34927,4379834,34840,33237,36176,34646,37781,39089,32161,42986,37633,39052,33374,43528,43787,36718,40876,35378,35…	hiw,SK,CG9935,cac,unc-104,amon,futsch,rdgC,Sra-1,Tbh,sgg,CG9514,Syt7,Rab5,Sytbeta,Rab3,Nrk,CASK,rho,CG40178,Ace,wnd,comt,crb,CG9509,rdx,spict,Syn1,Sap47,Fas2,Seipin,cpx,Lk,Eig71Ee,Rab40,Aplip1,Csk,Dok,ena,Ank2,RhoGAPp190,Liprin-gamma,wus,Syt12,klar,Liprin-alpha,Vha100-1,Gli,stnB,Rab14,cold,metro,crok,TBPH,MTF-1,CG18130,ssh,PIP5K59B,nwk,Npc2a,Cad99C,PMCA,Khc-73,Syt4,Dap160,Lar,Syx13,Syt14,brp,CG42…
	GO:0009605	response to external stimulus	2.94e-12	-26.5516	3.09e-10	769	99	0.143478	690	10917	35900,35184,318005,44786,32158,33262,36447,36876,34385,40224,41861,53437,31248,35049,41612,37007,42496,32619,38605,36445,41625,40225,35267,36703,37066,39717,33608,31364,36897,31245,49701,43950,39999,37201,41426,43469,41363,33916,317817,249072,38218,246456,53563,34840,37099,39400,33607,44642,38833,35037,33374,43758,39063,37341,38321,41096,35259,35662,39441,2768908,39873,38185,47767,35197,32999,422…	babo,Lim3,sphinx1,nerfin-1,cac,dock,GLaz,unc-104,Cdk5alpha,rdgC,Sra-1,Sulf1,sgg,CG6639,sim,Sema-1b,RhoGAP93B,para,shep,Nrk,Ace,gogo,CdGAPr,unc-5,Sema-5c,comm,slp2,Fas2,inaC,Seipin,gish,CdsA,Eip75B,ena,HisCl1,Ptp99A,pros,eya,CG32006,Liprin-alpha,drpr,CG30098,gukh,Rab14,IM23,CG32100,slp1,Apc,sphinx2,beat-IIIc,Npc2a,RhoGAP100F,PGRP-LC,CG11159,dos,ird1,Lar,so,mirr,CG3857,Nrt,CG12004,crc,brat,amn,gl,j…
	GO:0032502	developmental process	3.59e-12	-26.3543	3.7e-10	3223	286	0.414493	690	10917	35184,35997,37007,43234,42496,33840,36445,32637,34073,41704,42297,43656,43736,43321,49701,39999,37201,31069,40515,38961,43469,249072,39673,317817,53563,36403,36176,39537,34646,33607,36609,43758,33392,37341,117407,35378,35259,31179,35330,35197,38469,5740176,31017,39418,36295,36436,43146,42089,37888,37230,31940,35680,31271,32039,31290,31071,39293,32422,33314,31391,42672,34284,44786,31292,43215,5740…	Lim3,Mmp2,Sema-1b,ro,RhoGAP93B,CG9098,Nrk,mthl1,CG14535,rdx,nos,tll,Ef1alpha100E,RpS10a,gish,Eip75B,ena,CG11382,nrm,Cbl,Ptp99A,Liprin-alpha,Z600,CG32006,gukh,CG42663,metro,CG32137,crok,slp1,Oaz,RhoGAP100F,aop,CG11159,Tsp68C,Dap160,Lar,Unc-76,Cen,brat,scrt,CG34340,sdk,toe,jeb,Drl-2,boss,lute,betaTub60D,hts,CG15312,didum,w,sev,rst,CG3638,Mob2,CG12398,robo3,peb,loco,Pka-C1,nerfin-1,kirre,amon,futsch…
	GO:0050803	regulation of synapse structure and activity	3.74e-12	-26.3113	3.79e-10	124	32	0.0463768	690	10917	3.90523e+161	nwk,hiw,CG9935,cac,unc-104,Khc-73,futsch,Sra-1,sgg,Rab5,CASK,wnd,brat,stj,Syn2,spict,Syn1,Abl,Syt1,Fas2,Src64B,Sdc,Aplip1,Ank2,Nrx-1,Liprin-gamma,stan,alpha-Spec,Mob2,metro,TBPH,PIP5K59B
	GO:0050807	regulation of synapse organization	4.44e-12	-26.1405	4.42e-10	97	28	0.0405797	690	10917	3.90525e+141	nwk,Aplip1,hiw,cac,unc-104,futsch,Sra-1,Ank2,sgg,Nrx-1,Liprin-gamma,CASK,stan,wnd,brat,stj,alpha-Spec,Mob2,spict,Syn2,metro,Syn1,Abl,TBPH,Fas2,Src64B,Sdc,PIP5K59B
	GO:0048856	anatomical structure development	8.24e-12	-25.5222	8.08e-10	2914	263	0.381159	690	10917	35184,35997,37007,43234,42496,33840,36445,32637,34073,41704,42297,43656,43736,43321,49701,39999,37201,31069,40515,38961,43469,249072,39673,317817,53563,36176,39537,34646,33607,36609,43758,33392,37341,117407,35378,35259,31179,35330,35197,38469,5740176,31017,39418,36295,36436,43146,42089,37888,37230,31940,35680,32039,31290,31071,39293,33314,31391,42672,34284,44786,31292,5740544,41423,31248,45278,34…	Lim3,Mmp2,Sema-1b,ro,RhoGAP93B,CG9098,Nrk,mthl1,CG14535,rdx,nos,tll,Ef1alpha100E,RpS10a,gish,Eip75B,ena,CG11382,nrm,Cbl,Ptp99A,Liprin-alpha,Z600,CG32006,gukh,metro,CG32137,crok,slp1,Oaz,RhoGAP100F,aop,CG11159,Tsp68C,Dap160,Lar,Unc-76,Cen,brat,scrt,CG34340,sdk,toe,jeb,Drl-2,boss,lute,betaTub60D,hts,CG15312,didum,sev,rst,CG3638,Mob2,robo3,peb,loco,Pka-C1,nerfin-1,kirre,futsch,l(3)neo38,sgg,csw,Twdl…
	GO:0060284	regulation of cell development	1.2e-11	-25.1461	1.16e-09	200	41	0.0594203	690	10917	###############################################################################################################################################################################################################################################################	sv,unc-104,aop,ro,csw,kat-60L1,Dap160,Lar,brat,Dip3,sdk,spi,gcm,comm,lz,enc,slp2,CadN,Syt1,neur,didum,gish,sev,DAAM,Sema-1a,seq,Fhos,tutl,RhoGAPp190,pros,Liprin-alpha,stan,CG32006,exu,aos,oc,slp1,Apc,sty,ssh,Pka-C1
	GO:0051128	regulation of cellular component organization	1.29e-11	-25.0771	1.22e-09	557	78	0.113043	690	10917	32429,31292,32158,36876,5740544,41861,32551,31248,33418,42567,40143,47091,39717,34681,44543,40424,31364,32195,49701,53472,31667,37201,38863,32743,37552,41363,39673,249072,37345,4379834,36176,37781,44642,37633,42986,36632,39052,43528,40876,35523,40715,35259,42561,40205,35197,36526,36978,45922,34648,34069,36848,33022,35070,40288,45821,33473,37447,48973,35680,31075,35425,42443,38531,3772396,34192,39…	hiw,kirre,cac,unc-104,futsch,Sra-1,CycD,sgg,Rab5,CASK,wnd,comt,comm,spict,enc,Syn1,Fas2,Rab40,gish,Aplip1,Dok,ena,Ank2,RhoGAPp190,Liprin-gamma,pros,Z600,Liprin-alpha,exu,stnB,metro,TBPH,Apc,PIP5K59B,ssh,mspo,nwk,Cad99C,Syt4,mle,kat-60L1,Lar,GABA-B-R2,CG42674,brat,stj,Patronin,rap,aret,CG7115,Syn2,obst-A,CadN,cmpy,Abl,Syt1,Sdc,Src64B,didum,DAAM,step,CG15923,dyl,seq,Sema-1a,Fhos,Nrx-1,tutl,CG3618,s…
	GO:0045595	regulation of cell differentiation	1.86e-11	-24.7053	1.74e-09	291	51	0.073913	690	10917	36632,43825,31292,36876,31248,33392,43234,45278,40715,35378,35259,35197,53579,34648,31017,35253,34277,39717,42297,31883,44543,33608,35070,33473,41085,35680,49701,32039,31075,43087,34192,3772396,39004,46015,32743,34280,41363,33916,249072,36125,317817,37345,36544,39833,36555,31802,33607,44642,38424,42986,34284	mspo,sv,kirre,unc-104,sgg,aop,ro,csw,kat-60L1,Dap160,Lar,brat,Dip3,aret,sdk,spi,gcm,comm,nos,lz,enc,slp2,CadN,Syt1,neur,didum,gish,sev,DAAM,msi,Sema-1a,seq,Fhos,tutl,RhoGAPp190,gcm2,pros,eya,Liprin-alpha,stan,CG32006,exu,AGO1,aos,mam,oc,slp1,Apc,sty,ssh,Pka-C1
	GO:0051239	regulation of multicellular organismal process	2.42e-11	-24.4463	2.22e-09	564	78	0.113043	690	10917	35900,32429,34170,31292,32158,36876,45840,5740544,31248,43234,45278,42567,53579,42896,35646,39717,34681,44543,31883,33608,40424,38198,31364,49701,39999,31667,38863,32743,37552,41363,317817,249072,37345,36176,37781,33607,44642,42986,37633,43825,39052,33392,40715,35378,35259,35197,32999,36526,31017,35253,36848,34277,35070,45821,33473,37447,41085,48973,35680,31075,32039,35425,31290,38531,39054,37723…	babo,hiw,Akap200,kirre,cac,unc-104,cpo,futsch,sgg,ro,csw,CASK,Dip3,crb,Gadd45,comm,spict,enc,lz,slp2,Syn1,Bgb,Fas2,gish,Eip75B,Dok,Ank2,RhoGAPp190,Liprin-gamma,pros,CG32006,Liprin-alpha,exu,metro,TBPH,slp1,Apc,ssh,PIP5K59B,sv,nwk,aop,kat-60L1,Dap160,Lar,brat,amn,stj,sdk,spi,Syn2,gcm,CadN,Abl,Syt1,Sdc,neur,Src64B,didum,DAAM,sev,step,rst,dyl,Rdl,seq,Sema-1a,hbs,tutl,gcm2,stan,aos,alpha-Spec,oc,Mob2…
	GO:0030154	cell differentiation	2.63e-11	-24.3611	2.38e-09	2163	207	0.3	690	10917	35900,35184,38788,36876,35997,53437,50320,37007,43234,42496,33840,36445,42358,38168,40225,40143,34073,35266,42187,41704,42297,44543,31883,43656,43736,43321,31045,5740204,49701,39999,37201,38863,40515,38961,37552,32743,43469,38816,41363,38067,249072,317817,38218,36544,34927,53563,43803,36176,39537,33607,35037,42986,43528,43758,33392,37341,117407,35523,35378,35259,31179,39873,38185,32005,35197,3272…	babo,Lim3,Dscam2,unc-104,Mmp2,Sulf1,dpr12,Sema-1b,ro,RhoGAP93B,CG9098,Nrk,Ire1,rho,gogo,wnd,CG14535,bsh,CG7156,rdx,nos,enc,lz,tll,Ef1alpha100E,RpS10a,CG3703,clos,gish,Eip75B,ena,Ank2,nrm,Cbl,Liprin-gamma,RhoGAPp190,Ptp99A,qm,pros,klar,Liprin-alpha,CG32006,drpr,AGO1,Gli,gukh,Eph,metro,CG32137,slp1,beat-IIIc,ssh,Cad99C,RhoGAP100F,aop,CG11159,Tsp68C,mle,Dap160,Lar,Unc-76,Nrt,CG12004,CG32676,brat,B-H…
	GO:0007267	cell-cell signaling	2.87e-11	-24.2734	2.56e-09	534	75	0.108696	690	10917	32429,43806,32158,36876,45840,35997,5740544,41861,31718,31248,43783,33418,39630,32619,36127,326116,42567,41625,40143,47091,31068,34681,41704,40424,41938,31364,64877,38963,53472,33739,38863,37552,36606,32290,249072,37345,4379834,36176,37781,37633,39052,36718,40876,117407,35378,39485,32005,40544,35977,35197,32723,36526,42150,36848,41247,45821,33473,48973,41085,37447,31290,44861,42646,46015,40105,44…	hiw,CG9935,cac,unc-104,cpo,Mmp2,futsch,Sra-1,Tbh,sgg,Syt7,Rab5,Sytbeta,para,Rab3,tau,CASK,Ace,wnd,comt,CG14624,spict,rdx,Syn1,Sap47,Fas2,cpx,Unr,Aplip1,qtc,Ank2,Liprin-gamma,phyl,Syt12,Liprin-alpha,exu,stnB,metro,TBPH,PIP5K59B,nwk,Khc-73,Syt4,Tsp68C,Dap160,Syx13,CG32676,Syt14,brp,brat,B-H2,stj,Rim,Syn2,Syn,Abl,Syt1,Src64B,neur,Sdc,rst,sdt,Nrx-1,tutl,CG32206,drl,stan,aos,alpha-Spec,Ipp,svp,Atpalph…
	GO:0048869	cellular developmental process	3.52e-11	-24.0704	3.09e-09	2224	211	0.305797	690	10917	35900,35184,38788,36876,35997,53437,50320,37007,43234,42496,33840,36445,42358,38168,40225,40143,34073,35266,42187,41704,42297,44543,31883,43656,43736,43321,31045,5740204,49701,39999,31667,37201,38863,40515,38961,37552,32743,43469,38816,41363,38067,249072,317817,38218,36544,34927,53563,43803,36176,39537,33607,35037,42986,43528,43758,33392,37341,117407,35523,35378,35259,31179,39873,38185,32005,3519…	babo,Lim3,Dscam2,unc-104,Mmp2,Sulf1,dpr12,Sema-1b,ro,RhoGAP93B,CG9098,Nrk,Ire1,rho,gogo,wnd,CG14535,bsh,CG7156,rdx,nos,enc,lz,tll,Ef1alpha100E,RpS10a,CG3703,clos,gish,Eip75B,Dok,ena,Ank2,nrm,Cbl,Liprin-gamma,RhoGAPp190,Ptp99A,qm,pros,klar,Liprin-alpha,CG32006,drpr,AGO1,Gli,gukh,Eph,metro,CG32137,slp1,beat-IIIc,ssh,Cad99C,RhoGAP100F,aop,CG11159,Tsp68C,mle,Dap160,Lar,Unc-76,Nrt,CG12004,CG32676,brat…
	GO:0032879	regulation of localization	4.46e-11	-23.8337	3.86e-09	270	48	0.0695652	690	10917	38502,32158,40876,31248,33418,35259,42567,42561,47091,35197,42896,41215,34719,42150,41704,39717,44543,40288,35070,33473,45821,31245,64877,38574,35680,49701,43019,43950,38504,35425,34192,44856,37201,39004,42646,38786,41363,249072,37979,37345,4379834,40359,38501,37864,44317,35940,38491,34284	Teh2,cac,Syt4,sgg,Rab5,Lar,CASK,GABA-B-R2,comt,brat,crb,Teh1,CG9426,Rim,rdx,comm,enc,cmpy,CadN,Syt1,Abl,Seipin,cpx,CG13712,didum,gish,Bili,CdsA,tipE,step,Sema-1a,ru,ena,Fhos,Nrx-1,corn,pros,Liprin-alpha,NKAIN,exu,stnB,Rab26,Teh4,tamo,CanB,ltd,ens,Pka-C1
	GO:0042221	response to chemical	5.25e-11	-23.6703	4.48e-09	842	102	0.147826	690	10917	35900,35184,44786,34170,35832,33262,36447,36876,34385,45840,5740544,2768670,41861,53437,31718,31248,41612,37007,42496,45278,32619,36445,326116,42358,38168,41625,40225,35267,36703,42707,37066,39717,33608,43656,31364,36897,49701,39999,45338,43087,37201,43469,42310,41363,33916,317817,249072,36544,53563,33607,44642,39089,35037,39071,43758,46194,35259,39441,39873,42561,35197,32999,36295,43265,35253,27…	babo,Lim3,nerfin-1,Akap200,mtt,dock,GLaz,unc-104,Cdk5alpha,cpo,futsch,dpr9,Sra-1,Sulf1,Tbh,sgg,sim,Sema-1b,RhoGAP93B,csw,para,Nrk,tau,Ire1,rho,Ace,gogo,CdGAPr,unc-5,klg,Sema-5c,comm,slp2,tll,Fas2,inaC,gish,Eip75B,na,msi,ena,Ptp99A,unc79,pros,eya,CG32006,Liprin-alpha,AGO1,gukh,slp1,Apc,MTF-1,beat-IIIc,Hsp67Bc,RhoGAP100F,Spn,Lar,mirr,Nrt,GABA-B-R2,brat,amn,jeb,gb,spi,dpr,Drl-2,boss,pnr,gcm,Syn,beta…
	GO:0007155	cell adhesion	1.37e-10	-22.7145	1.15e-08	198	39	0.0565217	690	10917	###############################################################################################################################################################################################################################################################	Snmp2,Cad99C,Dscam2,kirre,alpha-catenin-related,glec,beat-VII,Lar,Dscam4,CASK,rho,CG42674,klg,CG7115,CadN,Fas2,Src64B,fw,boi,Cad96Cb,Dscam3,Gbeta13F,chp,dyl,rst,beat-IIIa,hbs,nrm,CG3618,stan,drpr,Gli,Fas1,alpha-Spec,beat-IIIb,Apc,Cad88C,beat-IIIc,plx
	GO:0050767	regulation of neurogenesis	1.45e-10	-22.6528	1.21e-08	141	32	0.0463768	690	10917	4.38254e+163	sv,unc-104,aop,ro,csw,kat-60L1,Lar,Dap160,brat,Dip3,sdk,spi,gcm,comm,slp2,CadN,neur,sev,DAAM,seq,Sema-1a,RhoGAPp190,tutl,pros,stan,Liprin-alpha,CG32006,aos,oc,slp1,sty,ssh
	GO:0022603	regulation of anatomical structure morphogenesis	2.07e-10	-22.2982	1.7e-08	254	45	0.0652174	690	10917	36632,43825,34170,31292,36876,41861,33392,43234,45278,40715,35259,42567,40205,53579,34069,35253,31883,35070,45821,31364,41085,32195,49701,32039,31075,38531,31667,34192,3772396,37201,39004,46015,32743,40303,41363,249072,36125,38231,31802,48971,40462,36750,44642,38424,42986	mspo,sv,Akap200,kirre,unc-104,Sra-1,aop,ro,csw,kat-60L1,Lar,CASK,CG42674,Dip3,CG7115,spi,lz,CadN,Abl,Fas2,neur,Rab40,gish,sev,DAAM,dyl,Dok,Sema-1a,seq,ena,Fhos,tutl,RhoGAPp190,CG3618,pros,Liprin-alpha,stan,alpha-Spec,oc,Atpalpha,Hem,Mlf,Apc,sty,ssh
	GO:0045664	regulation of neuron differentiation	2.54e-10	-22.0925	2.05e-08	106	27	0.0391304	690	10917	4.38253e+138	sv,DAAM,sev,unc-104,Sema-1a,seq,aop,tutl,ro,RhoGAPp190,csw,kat-60L1,Lar,pros,CG32006,Liprin-alpha,stan,Dip3,sdk,oc,comm,slp2,CadN,slp1,sty,neur,ssh
	GO:0022610	biological adhesion	2.66e-10	-22.0472	2.12e-08	211	40	0.057971	690	10917	###############################################################################################################################################################################################################################################################	Snmp2,Cad99C,Dscam2,kirre,alpha-catenin-related,glec,beat-VII,Lar,Dscam4,CASK,rho,CG42674,klg,CG7115,CadN,Fas2,Src64B,fw,Eig71Ee,boi,Cad96Cb,Dscam3,Gbeta13F,chp,dyl,rst,beat-IIIa,hbs,nrm,CG3618,stan,drpr,Gli,Fas1,alpha-Spec,beat-IIIb,Apc,Cad88C,beat-IIIc,plx
	GO:0098609	cell-cell adhesion	3e-10	-21.9269	2.36e-08	60	20	0.0289855	690	10917	4.21034e+99	Dscam3,Cad96Cb,Cad99C,chp,Dscam2,kirre,rst,beat-IIIa,glec,hbs,beat-VII,stan,Fas1,beat-IIIb,klg,CadN,Fas2,Cad88C,beat-IIIc,fw
	GO:0007156	homophilic cell adhesion	3.15e-10	-21.8795	2.44e-08	33	15	0.0217391	690	10917	3.61254e+74	stan,Dscam3,Cad96Cb,Cad99C,Fas1,chp,Dscam2,kirre,rst,klg,hbs,CadN,Fas2,Cad88C,fw
	GO:0051963	regulation of synapse assembly	3.31e-10	-21.8301	2.53e-08	86	24	0.0347826	690	10917	3.90523e+121	nwk,hiw,cac,unc-104,futsch,sgg,Ank2,Liprin-gamma,CASK,stan,brat,stj,alpha-Spec,spict,Syn2,Mob2,metro,Syn1,Abl,TBPH,Fas2,Src64B,Sdc,PIP5K59B
	GO:0023051	regulation of signaling	4.4e-10	-21.5443	3.33e-08	688	86	0.124638	690	10917	34582,41833,35900,32429,318005,34170,43806,32158,33262,35997,40224,53437,43683,31248,42496,33840,34957,42567,38168,47091,32674,41310,42896,41704,34681,41938,31364,36897,64877,38082,53472,38863,38961,32754,36606,38755,4379834,44642,38833,39052,37451,35588,39619,40876,32874,33392,38321,35378,46027,42561,41252,35977,40205,35197,36295,42150,35253,34633,36554,40288,2768944,33473,41085,44275,34718,3122…	kek2,SIDL,babo,hiw,sphinx1,Akap200,CG9935,cac,dock,Mmp2,rdgC,Sulf1,stops,sgg,RhoGAP93B,CG9098,pkaap,CASK,rho,comt,RSG7,Tsp86D,crb,rdx,spict,Sap47,Fas2,inaC,cpx,ebd1,Aplip1,Ank2,Cbl,CG42684,phyl,tow,stnB,Apc,sphinx2,nwk,MESK2,Epac,Tom,Syt4,CG42450,aop,dos,Dap160,kermit,GABA-B-R2,CG42795,brp,CG42674,brat,jeb,Rim,spi,Ced-12,RN-tre,cmpy,rho-5,Syt1,neur,SoxN,kek4,boi,CG5522,Bili,CG5337,CG7852,step,Rdl…
	GO:0008582	regulation of synaptic growth at neuromuscular junction	6.93e-10	-21.0898	5.18e-08	82	23	0.0333333	690	10917	3.90523e+116	nwk,hiw,cac,unc-104,futsch,sgg,Ank2,Liprin-gamma,CASK,brat,stj,alpha-Spec,spict,Syn2,Mob2,metro,Syn1,Abl,TBPH,Fas2,Src64B,Sdc,PIP5K59B
	GO:0007610	behavior	8.05e-10	-20.9404	5.94e-08	540	72	0.104348	690	10917	32429,34170,35832,32158,36876,43215,34385,45840,5740544,2768670,31718,31248,39617,41612,32619,42567,326116,38168,42707,37066,41938,31364,41616,49701,38504,45338,33739,38863,31107,42310,32754,36964,41363,38218,37781,38491,46194,35523,46027,42561,35977,32999,36849,34648,43265,35253,2768858,41247,37888,33473,37230,41085,48973,36010,31271,39054,34192,42646,46015,32846,44355,45976,31071,326198,31002,3…	hiw,Akap200,mtt,cac,unc-104,amon,Cdk5alpha,cpo,futsch,dpr9,Tbh,sgg,DCX-EMAP,sim,para,CASK,tau,rho,klg,Sema-5c,Sap47,Fas2,2mit,gish,tipE,na,qtc,Ank2,Nmdar2,unc79,CG42684,CG14478,pros,drpr,TBPH,ens,Spn,mle,kermit,GABA-B-R2,brp,amn,DAT,aret,gb,spi,dpr,Syn,betaTub60D,Syt1,hts,neur,Src64B,dila,w,Rdl,Sema-1a,Nrx-1,tutl,Bx,drl,retn,CG3638,Krn,Appl,oc,Atpalpha,Mob2,FoxP,ltd,fu12,Pka-C1
	GO:0010646	regulation of cell communication	8.48e-10	-20.8879	6.18e-08	697	86	0.124638	690	10917	34582,41833,35900,32429,318005,34170,43806,32158,33262,35997,40224,53437,43683,31248,42496,33840,34957,42567,38168,47091,32674,41310,42896,41704,34681,41938,31364,36897,64877,38082,53472,38863,38961,32754,36606,38755,4379834,44642,38833,39052,37451,35588,39619,40876,32874,33392,38321,35378,46027,42561,41252,35977,40205,35197,36295,42150,35253,34633,36554,40288,2768944,33473,41085,44275,34718,3122…	kek2,SIDL,babo,hiw,sphinx1,Akap200,CG9935,cac,dock,Mmp2,rdgC,Sulf1,stops,sgg,RhoGAP93B,CG9098,pkaap,CASK,rho,comt,RSG7,Tsp86D,crb,rdx,spict,Sap47,Fas2,inaC,cpx,ebd1,Aplip1,Ank2,Cbl,CG42684,phyl,tow,stnB,Apc,sphinx2,nwk,MESK2,Epac,Tom,Syt4,CG42450,aop,dos,Dap160,kermit,GABA-B-R2,CG42795,brp,CG42674,brat,jeb,Rim,spi,Ced-12,RN-tre,cmpy,rho-5,Syt1,neur,SoxN,kek4,boi,CG5522,Bili,CG5337,CG7852,step,Rdl…
	GO:0044087	regulation of cellular component biogenesis	9.46e-10	-20.7792	6.81e-08	202	38	0.0550725	690	10917	###############################################################################################################################################################################################################################################################	nwk,hiw,cac,unc-104,futsch,sgg,mle,CASK,brat,stj,spict,Syn2,enc,Syn1,Syt1,Abl,Fas2,Src64B,Sdc,didum,DAAM,ena,Fhos,Ank2,Liprin-gamma,stan,exu,alpha-Spec,Jupiter,Atf-2,Mob2,metro,NC2alpha,TBPH,Apc,PIP5K59B,ssh,Pka-C1
	GO:0051093	negative regulation of developmental process	2.05e-09	-20.0033	1.46e-07	181	35	0.0507246	690	10917	3.90523e+177	nwk,hiw,unc-104,sgg,aop,ro,brat,Dip3,stj,aret,sdk,spi,spict,gcm,nos,slp2,CadN,Abl,Src64B,neur,msi,seq,Liprin-gamma,gcm2,pros,CG32006,eya,AGO1,aos,mam,Mob2,TBPH,slp1,Apc,sty
	GO:0048663	neuron fate commitment	2.31e-09	-19.8855	1.63e-07	73	21	0.0304348	690	10917	4.47863e+105	nerfin-1,sev,ru,aop,Cbl,ro,csw,dos,phyl,Ire1,pros,CG32006,stan,gl,bsh,svp,klg,oc,boss,slp2,slp1
	GO:0008038	neuron recognition	3.12e-09	-19.5863	2.17e-07	110	26	0.0376812	690	10917	3.33743e+130	Npc2a,Sema-1a,Sulf1,dpr12,nrm,tutl,drl,RhoGAPp190,RhoGAP93B,Ptp99A,Nrt,CG12004,CG32006,stan,Gli,Fas1,alpha-Spec,comm,Drl-2,slp2,CadN,Abl,slp1,Fas2,beat-IIIc,robo3
	GO:0048638	regulation of developmental growth	4.15e-09	-19.2994	2.85e-07	127	28	0.0405797	690	10917	3.90523e+144	nwk,hiw,cac,unc-104,seq,futsch,Ank2,sgg,Liprin-gamma,Lar,CASK,Liprin-alpha,brat,stj,crb,alpha-Spec,spict,Syn2,Mob2,metro,CadN,Syn1,TBPH,Fas2,Abl,Src64B,Sdc,PIP5K59B
	GO:0035556	intracellular signal transduction	4.46e-09	-19.2281	3.03e-07	308	48	0.0695652	690	10917	37614,38209,43758,32157,34385,32551,32874,40224,43683,33392,39617,33418,32760,33840,36127,35267,32674,32999,35646,43682,40014,34015,36897,48973,47746,32195,42960,53472,40961,31667,42580,43317,40249,35041,33732,32743,32754,36606,326198,5740362,34553,34840,37978,40359,33520,41203,35940,34284	CG42260,RabX5,RhoGAP100F,CG10362,Cdk5alpha,CycD,CG42450,rdgC,stops,aop,DCX-EMAP,Rab5,Socs16D,CG9098,Rab3,CdGAPr,RSG7,amn,Gadd45,Gycbeta100B,grim,CG5160,inaC,Src64B,Lk,Rab40,RabX4,Aplip1,Gie,Dok,dnd,Tusp,RhoBTB,Lrch,CG9121,RhoGAPp190,CG42684,phyl,Krn,CG34384,Gyc32E,Rab14,Atf-2,Rab26,cnir,CG8500,ltd,Pka-C1
	GO:0008037	cell recognition	4.7e-09	-19.1761	3.16e-07	112	26	0.0376812	690	10917	3.33743e+130	Npc2a,Sema-1a,Sulf1,dpr12,nrm,tutl,drl,RhoGAPp190,RhoGAP93B,Ptp99A,Nrt,CG12004,CG32006,stan,Gli,Fas1,alpha-Spec,comm,Drl-2,slp2,CadN,Abl,slp1,Fas2,beat-IIIc,robo3
	GO:0045466	R7 cell differentiation	6.28e-09	-18.8865	4.17e-07	45	16	0.0231884	690	10917	2.49072e+82	Liprin-alpha,RhoGAP100F,sev,svp,klg,seq,boss,aop,lz,CadN,dos,csw,Cbl,Lar,phyl,pros
	GO:0044708	single-organism behavior	2.02e-08	-17.7175	1.33e-06	395	55	0.0797101	690	10917	32429,34170,35832,32158,36876,43215,34385,45840,5740544,2768670,46194,31718,31248,39617,41612,32619,326116,42567,38168,42561,35977,32999,42707,35253,43265,37066,41938,41247,37888,33473,31364,41616,48973,41085,36010,49701,31271,45338,38863,31107,42646,46015,44355,32846,42310,326198,38218,31002,31802,48971,39293,37781,34284,35940,34176	hiw,Akap200,mtt,cac,unc-104,amon,Cdk5alpha,cpo,futsch,dpr9,Spn,Tbh,sgg,DCX-EMAP,sim,para,tau,CASK,rho,GABA-B-R2,brp,amn,klg,spi,gb,Sema-5c,Sap47,Syn,betaTub60D,Syt1,Fas2,2mit,Src64B,neur,dila,gish,w,na,Ank2,Nmdar2,Nrx-1,tutl,drl,Bx,unc79,Krn,drpr,Appl,oc,Atpalpha,Mob2,TBPH,Pka-C1,ltd,fu12
	GO:0048523	negative regulation of cellular process	3.15e-08	-17.2718	2.05e-06	896	98	0.142029	690	10917	40370,34582,32429,43422,34170,36401,33262,36876,35021,35997,5740544,53437,31248,33418,43234,45278,34957,32674,53579,42896,41704,34681,42297,31883,33608,41025,31364,38963,49701,43087,41398,38863,38961,37552,32754,41363,39673,33916,317817,32724,38755,36544,31000,37781,33607,44642,34370,39052,39619,32874,33392,35378,39441,42561,37516,35197,32723,44819,36526,36978,38469,37188,34648,31017,36295,39418,…	Aef1,kek2,hiw,eIF4E-6,Akap200,wuc,dock,unc-104,CG13284,Mmp2,futsch,Sulf1,sgg,Rab5,ro,csw,pkaap,RSG7,Dip3,crb,rdx,spict,nos,lz,slp2,p,Fas2,Unr,gish,msi,Csk,Ank2,Cbl,Liprin-gamma,CG42684,pros,Z600,eya,CG32006,B-H1,tow,AGO1,elav,TBPH,slp1,Apc,Rsf1,nwk,Tom,CG42450,aop,Dap160,mirr,GABA-B-R2,GlcT-1,brat,B-H2,g,stj,Patronin,scrt,Topors,aret,sdk,jeb,toe,spi,pnr,gcm,obst-A,cmpy,CadN,grim,Abl,neur,Src64B,k…
	GO:0007416	synapse assembly	3.22e-08	-17.2515	2.07e-06	56	17	0.0246377	690	10917	3.56233e+85	lbm,Sema-1a,sgg,Nrx-1,Dap160,Lar,pros,repo,Liprin-alpha,CG34127,Gli,AGO1,Prosap,jeb,Atpalpha,comm,cpx
	GO:0044763	single-organism cellular process	4.53e-08	-16.9109	2.88e-06	4900	378	0.547826	690	10917	37614,5740876,35184,32429,35832,43806,39332,35997,39617,43783,37007,43234,42496,32619,33840,36445,41625,32637,47091,34073,35646,41704,42297,43656,43736,43321,47746,49701,39999,43317,37201,31107,40515,43469,38961,5740362,249072,317817,42213,53563,4379834,31550,32230,36176,39537,34646,33607,40126,33520,36669,43758,39063,40876,33392,117407,37341,41096,35378,35259,31179,42561,35977,35330,35197,38469,…	CG42260,CG34452,Lim3,hiw,mtt,CG9935,Klp68D,Mmp2,DCX-EMAP,Syt7,Sema-1b,ro,RhoGAP93B,para,CG9098,Nrk,Ace,mthl1,comt,CG14535,Gadd45,rdx,nos,tll,Ef1alpha100E,RpS10a,Lk,gish,Eip75B,Tusp,ena,Nmdar2,nrm,Ptp99A,Cbl,CG34384,Liprin-alpha,CG32006,cona,gukh,stnB,Ca-alpha1T,CG3812,metro,CG32137,crok,slp1,Rcd7,cnir,CG10253,RhoGAP100F,PGRP-LC,Syt4,aop,Tsp68C,CG11159,ird1,Dap160,Lar,Unc-76,GABA-B-R2,brp,Cen,brat…
	GO:0045165	cell fate commitment	8.82e-08	-16.2441	5.55e-06	478	61	0.0884058	690	10917	43825,44786,39619,35997,33392,41612,117407,43234,38321,45278,42358,42567,326116,38168,32005,35197,31068,32723,42210,35266,42707,36295,35253,43146,34277,44849,41704,42297,33608,31883,44543,43656,37230,39620,41085,38963,32544,32039,31290,43087,33739,3772396,44856,44861,46015,38961,40105,36606,41363,317817,36125,37345,36544,39833,36555,38231,41491,31802,33607,42672,31391	sv,nerfin-1,Tom,Mmp2,aop,sim,Tsp68C,ro,dos,csw,Ire1,CASK,tau,rho,CG32676,brat,CG14624,B-H2,gl,bsh,klg,jeb,spi,boss,gcm,pnr,rdx,nos,slp2,lz,enc,tll,hts,Brd,neur,Unr,Gbeta13F,sev,rst,msi,qtc,seq,ru,sdt,tutl,Cbl,CG32206,phyl,pros,CG32006,stan,exu,AGO1,aos,mam,alpha-Spec,svp,oc,slp1,loco,peb
	GO:0060341	regulation of cellular localization	9.62e-08	-16.1568	5.99e-06	137	27	0.0391304	690	10917	3.56805e+136	didum,gish,cac,Syt4,ru,sgg,Nrx-1,CASK,corn,pros,GABA-B-R2,brat,exu,crb,stnB,CG9426,Rim,Rab26,rdx,enc,cmpy,Syt1,Abl,tamo,cpx,CanB,Pka-C1
	GO:0050804	regulation of synaptic transmission	1.02e-07	-16.1022	6.26e-06	74	19	0.0275362	690	10917	4.38063e+96	CG9935,cac,Rdl,Syt4,Ank2,Nrx-1,CASK,GABA-B-R2,comt,brp,brat,alpha-Spec,stnB,jeb,Rim,Sap47,Syt1,cpx,Pka-C1
	GO:0051049	regulation of transport	1.08e-07	-16.0368	6.62e-06	173	31	0.0449275	690	10917	4.97014e+156	gish,tipE,step,Teh2,cac,Syt4,ru,sgg,Nrx-1,Rab5,corn,CASK,GABA-B-R2,comt,NKAIN,brat,crb,Teh1,stnB,CG9426,Rim,Rab26,rdx,comm,cmpy,Syt1,Abl,Teh4,tamo,cpx,CanB
	GO:0008306	associative learning	1.7e-07	-15.5904	1.02e-05	69	18	0.026087	690	10917	4.97016e+93	gish,futsch,sgg,Nrx-1,drl,tau,rho,Krn,amn,klg,spi,Mob2,Syn,Sap47,Fas2,Src64B,ltd,Pka-C1
	GO:0045467	R7 cell development	1.78e-07	-15.5422	1.06e-05	21	10	0.0144928	690	10917	2.49072e+52	Liprin-alpha,RhoGAP100F,sev,seq,boss,aop,lz,CadN,Lar,phyl
	GO:0007611	learning or memory	2.41e-07	-15.2385	1.41e-05	143	27	0.0391304	690	10917	4.97013e+138	gish,w,futsch,Ank2,Tbh,Nmdar2,sgg,Nrx-1,drl,tau,CASK,rho,Krn,brp,amn,Appl,klg,spi,Mob2,Sap47,Syn,Fas2,2mit,Src64B,neur,Pka-C1,ltd
	GO:0050890	cognition	2.41e-07	-15.2385	1.41e-05	143	27	0.0391304	690	10917	4.97013e+138	gish,w,futsch,Ank2,Tbh,Nmdar2,sgg,Nrx-1,drl,CASK,tau,rho,Krn,brp,amn,Appl,klg,spi,Mob2,Sap47,Syn,Fas2,2mit,Src64B,neur,Pka-C1,ltd
	GO:0007612	learning	3.11e-07	-14.9844	1.8e-05	79	19	0.0275362	690	10917	4.97016e+98	gish,futsch,Tbh,sgg,Nrx-1,drl,tau,rho,Krn,amn,klg,spi,Mob2,Syn,Sap47,Fas2,Src64B,ltd,Pka-C1
	GO:0051716	cellular response to stimulus	3.17e-07	-14.9635	1.82e-05	1325	128	0.185507	690	10917	37614,35900,32429,35832,32158,32157,33262,36447,34385,40224,32551,43683,31718,31248,39617,41612,33418,45278,33840,36127,36445,42358,38168,40143,32637,39351,35267,32674,36703,40965,41190,35646,31883,43656,34015,36897,47746,32195,49701,5740204,53472,43950,39999,38504,43087,37824,41398,42580,31667,43317,38863,31107,35041,32743,38961,32754,36606,35620,5740362,43585,38057,36544,34840,318046,43803,3709…	CG42260,babo,hiw,mtt,cac,CG10362,dock,GLaz,Cdk5alpha,rdgC,CycD,stops,Tbh,sgg,DCX-EMAP,sim,Rab5,csw,CG9098,Rab3,Nrk,Ire1,rho,wnd,mthl1,Rpt4R,CdGAPr,RSG7,unc-5,DNApol-iota,Rpt3R,Gadd45,lz,tll,CG5160,inaC,Lk,Rab40,gish,clos,Aplip1,CdsA,Eip75B,tipE,msi,Pask,Csk,dnd,Dok,Tusp,Ank2,Nmdar2,Lrch,RhoGAPp190,Cbl,CG42684,phyl,Tsp42Ej,CG34384,CG11498,mthl10,AGO1,Rab14,mthl14,Eph,IM23,Octbeta3R,CG13830,cnir,Hs…
	GO:0022604	regulation of cell morphogenesis	3.27e-07	-14.9344	1.86e-05	163	29	0.042029	690	10917	3.21955e+147	Rab40,gish,DAAM,dyl,unc-104,seq,Sema-1a,Dok,Sra-1,ena,Fhos,tutl,RhoGAPp190,kat-60L1,CG3618,Lar,CASK,pros,stan,Liprin-alpha,CG42674,alpha-Spec,CG7115,Atpalpha,Hem,CadN,Abl,Fas2,ssh
	GO:0046552	photoreceptor cell fate commitment	3.58e-07	-14.844	2.02e-05	58	16	0.0231884	690	10917	3.20394e+79	sev,ru,aop,Cbl,csw,dos,ro,phyl,Ire1,pros,stan,svp,gl,oc,klg,boss
	GO:0048519	negative regulation of biological process	3.91e-07	-14.7557	2.18e-05	1032	105	0.152174	690	10917	40370,34582,32429,43422,34170,36401,33262,36876,35021,35997,5740544,53437,31248,33418,43234,45278,34957,38168,32674,53579,42896,41704,34681,42297,31883,33608,41025,31364,47746,38963,49701,43087,41398,38863,38961,37552,32754,41363,39673,33916,317817,32724,38755,36544,38620,31000,37781,33607,33509,44642,37864,34370,39052,39619,32874,33392,35378,39441,42561,37516,32723,35197,44819,36526,36978,38469,…	Aef1,kek2,hiw,eIF4E-6,Akap200,wuc,dock,unc-104,CG13284,Mmp2,futsch,Sulf1,sgg,Rab5,ro,csw,pkaap,rho,RSG7,Dip3,crb,rdx,spict,nos,lz,slp2,p,Fas2,Lk,Unr,gish,msi,Csk,Ank2,Cbl,Liprin-gamma,CG42684,pros,Z600,eya,CG32006,B-H1,tow,AGO1,blanks,elav,TBPH,slp1,CG17265,Apc,tamo,Rsf1,nwk,Tom,CG42450,aop,Dap160,mirr,GABA-B-R2,GlcT-1,B-H2,brat,g,stj,Patronin,scrt,Topors,aret,sdk,CG9426,jeb,toe,spi,pnr,gcm,obst-…
	GO:0007528	neuromuscular junction development	4.26e-07	-14.6692	2.36e-05	73	18	0.026087	690	10917	3.68766e+92	unc-104,futsch,sgg,Ank2,Nrx-1,Dap160,Lar,sff,repo,Liprin-alpha,stj,jeb,Atpalpha,Hem,cmpy,Fas2,TBPH,cpx
	GO:0008355	olfactory learning	4.62e-07	-14.5872	2.54e-05	59	16	0.0231884	690	10917	4.97016e+83	gish,futsch,sgg,drl,tau,rho,Krn,amn,klg,spi,Mob2,Syn,Fas2,Src64B,ltd,Pka-C1
	GO:0003008	system process	4.81e-07	-14.5473	2.61e-05	559	66	0.0956522	690	10917	31292,32158,39332,5740544,2768670,40224,43683,40800,50320,31718,31248,39617,42567,326116,38168,42707,37066,41938,31364,36897,41616,40580,49701,45338,32387,38863,31107,41363,246666,32071,39180,35977,32999,36526,42210,35253,43146,2768858,44849,41381,34408,41247,2768865,37447,41085,48973,31271,32572,34192,44856,39004,42646,44355,35743,38251,326198,40157,31002,35408,48971,35789,39293,42672,37843,3594…	kirre,cac,Klp68D,futsch,dpr9,rdgC,stops,dpr11,dpr12,Tbh,sgg,DCX-EMAP,CASK,tau,rho,klg,Sema-5c,Sap47,Fas2,inaC,2mit,rpk,gish,na,dpr8,Ank2,Nmdar2,pros,Obp51a,Kap3,dpr10,brp,amn,stj,gl,spi,boss,dpr,pnr,dpr5,dpr19,Syn,dpr7,Sdc,neur,Src64B,w,dpr18,Sema-1a,ru,Fhos,Nrx-1,drl,Or43b,Tmhs,Krn,Ir76a,Appl,nrv3,Atpalpha,Obp44a,Mob2,loco,sei,ltd,Pka-C1
	GO:0007417	central nervous system development	6.76e-07	-14.2075	3.64e-05	236	36	0.0521739	690	10917	3.59003e+179	babo,Ror,sim,csw,dan,rho,Nrt,brat,bsh,Sema-5c,Ced-12,tll,grim,Abl,Fas2,Src64B,neur,SoxN,Sema-1a,RhoGAPp190,pros,CG3638,eya,stan,alpha-Spec,mam,svp,elav,oc,Eph,Hem,TBPH,Apc,loco,robo3,ssh
	GO:0050877	neurological system process	9.24e-07	-13.8948	4.93e-05	511	61	0.0884058	690	10917	246666,32071,39180,32158,39332,5740544,2768670,40224,43683,40800,50320,31718,31248,39617,326116,42567,38168,35977,32999,36526,42210,42707,35253,37066,34408,41381,2768858,43146,41938,41247,2768865,31364,36897,41616,48973,41085,37447,40580,49701,31271,32572,45338,32387,34192,31107,38863,42646,44355,35743,41363,326198,38251,40157,31002,35408,48971,39293,35789,37843,34284,35940	Obp51a,Kap3,dpr10,cac,Klp68D,futsch,dpr9,rdgC,stops,dpr11,dpr12,Tbh,sgg,DCX-EMAP,tau,CASK,rho,brp,amn,stj,gl,klg,spi,Sema-5c,dpr19,dpr5,dpr,boss,Sap47,Syn,dpr7,Fas2,inaC,2mit,Src64B,neur,Sdc,rpk,gish,w,dpr18,na,dpr8,Sema-1a,Nmdar2,Ank2,Nrx-1,drl,Or43b,pros,Krn,Tmhs,Ir76a,Appl,nrv3,Atpalpha,Mob2,Obp44a,sei,Pka-C1,ltd
	GO:0042067	establishment of ommatidial planar polarity	9.63e-07	-13.8529	5.07e-05	62	16	0.0231884	690	10917	3.61255e+80	stan,gish,aos,sev,svp,sano,rdx,aop,hbs,CadN,ro,sty,peb,fw,mirr,Krn
	GO:0042706	eye photoreceptor cell fate commitment	9.76e-07	-13.8402	5.07e-05	55	15	0.0217391	690	10917	3.61253e+74	stan,sev,gl,svp,klg,ru,boss,aop,dos,csw,ro,Cbl,phyl,Ire1,pros
	GO:0001752	compound eye photoreceptor fate commitment	9.76e-07	-13.8402	5.07e-05	55	15	0.0217391	690	10917	3.61253e+74	stan,sev,gl,svp,klg,ru,boss,aop,dos,csw,ro,Cbl,phyl,Ire1,pros
	GO:0007465	R7 cell fate commitment	1.36e-06	-13.5044	7.04e-05	20	9	0.0130435	690	10917	3.20394e+44	sev,svp,klg,boss,Cbl,csw,dos,phyl,pros
	GO:0001738	morphogenesis of a polarized epithelium	1.43e-06	-13.457	7.31e-05	103	21	0.0304348	690	10917	4.97013e+105	gish,sev,Tom,aop,hbs,sdt,ro,kermit,mirr,Krn,stan,tow,aos,crb,sano,svp,rdx,CadN,sty,fw,peb
	GO:0045596	negative regulation of cell differentiation	1.92e-06	-13.1618	9.71e-05	122	23	0.0333333	690	10917	4.30874e+117	msi,seq,sgg,aop,ro,gcm2,pros,CG32006,eya,brat,AGO1,Dip3,aos,mam,aret,sdk,gcm,nos,slp2,CadN,slp1,sty,neur
	GO:0009966	regulation of signal transduction	1.93e-06	-13.1568	9.71e-05	617	69	0.1	690	10917	34582,41833,35900,32429,318005,34170,33262,35997,40224,53437,43683,31248,42496,33840,34957,38168,32674,41310,42896,41704,34681,31364,36897,38082,53472,38961,32754,36606,38755,44642,38833,39052,37451,35588,39619,32874,33392,38321,35378,46027,41252,40205,36295,35253,34633,36554,40288,2768944,41085,44275,31229,34718,36881,34431,43019,38178,35425,326197,44129,326198,36125,31537,39833,32790,38424,3139…	kek2,SIDL,babo,hiw,sphinx1,Akap200,dock,Mmp2,rdgC,Sulf1,stops,sgg,RhoGAP93B,CG9098,pkaap,rho,RSG7,Tsp86D,crb,rdx,spict,Fas2,inaC,ebd1,Aplip1,Cbl,CG42684,phyl,tow,Apc,sphinx2,nwk,MESK2,Epac,Tom,CG42450,aop,dos,Dap160,kermit,CG42795,CG42674,jeb,spi,Ced-12,RN-tre,cmpy,rho-5,neur,SoxN,boi,kek4,CG5522,CG5337,Bili,CG7852,step,Ndfip,hbs,Krn,stan,CG5937,aos,RhoGAP16F,sty,peb,loco,plx,Pka-C1
	GO:0042048	olfactory behavior	1.99e-06	-13.1283	9.91e-05	105	21	0.0304348	690	10917	4.97015e+108	gish,cpo,futsch,Spn,sgg,drl,tau,rho,GABA-B-R2,Krn,amn,klg,spi,Sema-5c,Mob2,Syn,Fas2,neur,Src64B,ltd,Pka-C1
	GO:0051129	negative regulation of cellular component organization	2.14e-06	-13.0564	0.0001047	114	22	0.0318841	690	10917	3.90525e+111	nwk,gish,hiw,CG15923,unc-104,seq,sgg,Liprin-gamma,pros,GABA-B-R2,Z600,stj,Patronin,alpha-Spec,Mob2,spict,obst-A,NC2alpha,CadN,TBPH,Abl,Src64B
	GO:0007635	chemosensory behavior	2.14e-06	-13.0564	0.0001047	114	22	0.0318841	690	10917	4.97015e+113	gish,cpo,futsch,Spn,sgg,drl,tau,rho,GABA-B-R2,Krn,amn,klg,gb,spi,Sema-5c,Mob2,Syn,Fas2,neur,Src64B,ltd,Pka-C1
	GO:0044699	single-organism process	2.84e-06	-12.7733	0.00013783	6380	460	0.666667	690	10917	37614,5740876,35184,32429,35832,31456,43806,39332,35997,39617,43783,37007,43234,42496,32619,33840,36445,41625,32637,47091,34073,35646,41704,42297,43656,43736,43321,47746,49701,39999,38504,43317,37201,31069,41426,31107,40515,43469,38961,5740362,39673,249072,317817,42213,53563,4379834,31550,32230,36403,36176,39537,34646,33607,40126,33520,36609,36669,43758,39063,40876,33392,117407,37341,41096,35378,…	CG42260,CG34452,Lim3,hiw,mtt,SK,CG9935,Klp68D,Mmp2,DCX-EMAP,Syt7,Sema-1b,ro,RhoGAP93B,para,CG9098,Nrk,Ace,mthl1,comt,CG14535,Gadd45,rdx,nos,tll,Ef1alpha100E,RpS10a,Lk,gish,Eip75B,tipE,Tusp,ena,CG11382,HisCl1,Nmdar2,nrm,Ptp99A,Cbl,CG34384,Z600,Liprin-alpha,CG32006,cona,gukh,stnB,Ca-alpha1T,CG3812,CG42663,metro,CG32137,crok,slp1,Rcd7,cnir,Oaz,CG10253,RhoGAP100F,PGRP-LC,Syt4,aop,Tsp68C,CG11159,ird1,…
	GO:0007164	establishment of tissue polarity	3.11e-06	-12.6804	0.00014883	91	19	0.0275362	690	10917	4.97013e+95	gish,sev,Tom,aop,hbs,ro,kermit,mirr,Krn,stan,tow,aos,sano,svp,rdx,CadN,sty,fw,peb
	GO:0001736	establishment of planar polarity	3.11e-06	-12.6804	0.00014883	91	19	0.0275362	690	10917	4.97013e+95	gish,sev,Tom,aop,hbs,ro,kermit,mirr,Krn,stan,tow,aos,sano,svp,rdx,CadN,sty,fw,peb
	GO:0016043	cellular component organization	3.24e-06	-12.64	0.00015373	2284	193	0.27971	690	10917	35900,35184,32429,36401,38788,39332,36876,35021,35997,53437,37007,42496,33840,36445,42358,33599,38168,40143,40225,47091,43633,34073,42187,42297,44543,31045,5740204,31667,37201,32293,38863,32743,43469,37552,41363,38067,249072,317817,42213,33845,38218,36544,34927,37810,53563,4379834,43803,36176,39537,34646,33607,40126,35037,42986,43528,43758,33392,35523,35378,35259,39873,35977,32723,35197,38469,574…	babo,Lim3,hiw,wuc,Dscam2,Klp68D,unc-104,CG13284,Mmp2,Sulf1,Sema-1b,RhoGAP93B,CG9098,Nrk,Ire1,Shaw,rho,wnd,gogo,comt,tmod,CG14535,CG7156,nos,enc,CG3703,clos,Dok,ena,Rbp1-like,Ank2,RhoGAPp190,Ptp99A,Liprin-gamma,pros,klar,Liprin-alpha,CG32006,cona,mtm,drpr,AGO1,Gli,thoc5,gukh,stnB,Eph,metro,CG32137,crok,slp1,Rcd7,beat-IIIc,ssh,Cad99C,RhoGAP100F,aop,mle,Dap160,Lar,Nrt,brp,B-H2,brat,scrt,CG34340,Rim,…
	GO:0007043	cell-cell junction assembly	3.34e-06	-12.61	0.00015663	46	13	0.0188406	690	10917	3.53433e+64	vari,bou,Gli,kirre,crb,Atpalpha,kune,cold,sdt,crok,loco,Src64B,kst
	GO:0001505	regulation of neurotransmitter levels	3.35e-06	-12.6056	0.00015663	117	22	0.0318841	690	10917	3.21584e+111	cac,Syt4,Tbh,Syt7,Sytbeta,Dap160,Rab3,CASK,Syx13,Syt12,Syt14,Ace,brp,comt,stj,stnB,Rim,Caps,Syn,Syt1,cpx,CanB
	GO:0007163	establishment or maintenance of cell polarity	3.49e-06	-12.5656	0.00016177	192	30	0.0434783	690	10917	4.97013e+150	gish,Kap3,sev,Klp68D,Csk,Khc-73,hbs,sgg,aop,sdt,Rab5,Cbl,ro,csw,CASK,mirr,Krn,stan,aos,crb,svp,sano,rdx,CadN,Apc,sty,peb,loco,fw,Pka-C1
	GO:0010769	regulation of cell morphogenesis involved in differentiation	4.05e-06	-12.4163	0.00018636	61	15	0.0217391	690	10917	2.49072e+77	Liprin-alpha,stan,gish,DAAM,unc-104,seq,Sema-1a,Fhos,CadN,tutl,RhoGAPp190,kat-60L1,Lar,pros,ssh
	GO:0016192	vesicle-mediated transport	4.19e-06	-12.3834	0.00019113	523	60	0.0869565	690	10917	38209,41833,39063,32158,36876,35021,40876,41861,33392,43783,33418,45278,39630,35378,36127,42567,31179,39485,40544,47091,35197,40912,44819,36526,42150,43265,34633,39717,41247,33473,36897,64877,38418,32195,42960,53472,35425,33739,32846,38961,32683,37536,41363,35620,31071,44936,249072,33845,31537,38218,43816,4379834,34840,40359,40462,49968,43660,33520,44317,35940	RabX5,SIDL,PGRP-LC,cac,unc-104,CG13284,Syt4,Sra-1,aop,Syt7,Rab5,csw,Sytbeta,Dap160,Rab3,CASK,Unc-76,Syx13,Syt14,comt,brat,CG34127,g,stj,Rim,gb,Ced-12,comm,Syn,Syt1,inaC,cpx,kst,Rab40,RabX4,Aplip1,step,qtc,Bx,Cbl,wus,Vps35,pros,Tsp42Ej,CG3638,Eip93F,Liprin-alpha,mtm,CG5937,drpr,MED26,stnB,Rab14,Rab26,Hem,Caps,CG12071,cnir,CanB,ltd
	GO:0030534	adult behavior	4.33e-06	-12.3501	0.00019609	146	25	0.0362319	690	10917	3.60103e+126	dila,hiw,Akap200,mtt,na,cac,Cdk5alpha,dpr9,Tbh,sim,DCX-EMAP,tutl,CASK,rho,brp,amn,oc,klg,Atpalpha,spi,Syn,TBPH,Fas2,fu12,Pka-C1
	GO:0002028	regulation of sodium ion transport	5.66e-06	-12.0825	0.00025434	6	5	0.00724638	690	10917	3.79794e+24	NKAIN,Teh4,Teh1,tipE,Teh2
	GO:0040008	regulation of growth	6.14e-06	-11.9999	0.00027417	238	34	0.0492754	690	10917	3.90524e+174	nwk,babo,hiw,cac,unc-104,futsch,CycD,sgg,Lar,CASK,brat,stj,crb,spict,Syn2,cmpy,CadN,Syn1,Abl,Fas2,Src64B,Sdc,step,Csk,seq,Ank2,Liprin-gamma,Liprin-alpha,drpr,alpha-Spec,Mob2,metro,TBPH,PIP5K59B
	GO:0034329	cell junction assembly	7.22e-06	-11.8385	0.00031981	49	13	0.0188406	690	10917	3.53433e+64	vari,bou,Gli,kirre,crb,Atpalpha,kune,cold,sdt,crok,loco,Src64B,kst
	GO:0007626	locomotory behavior	8.02e-06	-11.7331	0.00035276	180	28	0.0405797	690	10917	3.60103e+139	dila,hiw,na,cac,unc-104,amon,Cdk5alpha,Sema-1a,Tbh,sgg,DCX-EMAP,sim,tutl,Bx,unc79,kermit,CASK,brp,drpr,oc,Atpalpha,Sema-5c,TBPH,hts,Syt1,neur,ens,Pka-C1
	GO:0046532	regulation of photoreceptor cell differentiation	8.3e-06	-11.699	0.00036234	36	11	0.015942	690	10917	4.38255e+54	sv,Dip3,sev,sdk,oc,aop,csw,ro,sty,neur,pros
	GO:0051179	localization	8.53e-06	-11.6713	0.00036978	1920	165	0.23913	690	10917	37614,41833,36488,31456,43806,39332,36876,35021,39461,43783,32619,33599,39093,47091,42297,34268,36897,47746,40580,49701,38504,37201,38863,38651,41426,31107,35370,38961,38816,41363,32290,35620,38067,249072,33845,38218,34927,37810,33247,53563,4379834,31550,35578,37864,33520,318563,39063,40876,33392,35378,31179,35977,35197,36849,42150,43265,37230,41085,38418,42960,36010,35680,31271,35425,40551,36145…	CG42260,SIDL,CG42321,SK,CG9935,Klp68D,unc-104,CG13284,Ent3,Syt7,para,Shaw,CG3529,comt,nos,Oatp30B,inaC,Lk,rpk,gish,tipE,ena,Ank2,Cralbp,HisCl1,Nmdar2,tadr,Cbl,qm,pros,Syt12,Tsp42Ej,klar,Liprin-alpha,mtm,drpr,Gli,thoc5,Eaat2,gukh,stnB,Ca-alpha1T,CG3409,tamo,cnir,CG31030,PGRP-LC,Syt4,aop,Dap160,Unc-76,brp,brat,DAT,Rim,gb,hts,neur,kst,RabX4,dila,didum,w,step,CG1090,CG12344,CG3638,Eip93F,Krn,wisp,bbg…
	GO:0016199	axon midline choice point recognition	8.99e-06	-11.6189	0.0003857	30	10	0.0144928	690	10917	3.17817e+50	CG32006,alpha-Spec,Sema-1a,comm,slp2,tutl,RhoGAP93B,slp1,Abl,drl
	GO:2000027	regulation of organ morphogenesis	9.03e-06	-11.6148	0.0003857	89	18	0.026087	690	10917	4.38255e+89	sv,gish,Akap200,sev,aop,ro,csw,pros,stan,Dip3,oc,spi,Mlf,lz,Abl,Apc,sty,neur
	GO:0045886	negative regulation of synaptic growth at neuromuscular junction	1.11e-05	-11.4043	0.00046284	37	11	0.015942	690	10917	3.90523e+54	nwk,hiw,stj,unc-104,spict,Mob2,sgg,Abl,Liprin-gamma,TBPH,Src64B
	GO:0051964	negative regulation of synapse assembly	1.11e-05	-11.4043	0.00046284	37	11	0.015942	690	10917	3.90523e+54	nwk,hiw,stj,unc-104,spict,Mob2,sgg,Abl,Liprin-gamma,TBPH,Src64B
	GO:0010970	microtubule-based transport	1.11e-05	-11.4043	0.00046284	37	11	0.015942	690	10917	3.60104e+56	dila,didum,Aplip1,Kap3,Klp68D,unc-104,futsch,syd,CG9279,Unc-76,klar
	GO:0051961	negative regulation of nervous system development	1.11e-05	-11.4043	0.00046284	37	11	0.015942	690	10917	3.90523e+54	nwk,hiw,stj,unc-104,spict,Mob2,sgg,TBPH,Liprin-gamma,Abl,Src64B
	GO:0007269	neurotransmitter secretion	1.57e-05	-11.0642	0.00064583	110	20	0.0289855	690	10917	3.21584e+101	cac,Syt4,Syt7,Sytbeta,Dap160,Rab3,CASK,Syx13,Syt12,Syt14,brp,comt,stj,stnB,Rim,Caps,Syn,Syt1,cpx,CanB
	GO:0023061	signal release	1.8e-05	-10.9254	0.00073697	111	20	0.0289855	690	10917	3.21584e+101	cac,Syt4,Syt7,Sytbeta,Dap160,Rab3,CASK,Syx13,Syt12,Syt14,brp,comt,stj,stnB,Rim,Caps,Syn,Syt1,cpx,CanB
	GO:0023057	negative regulation of signaling	1.89e-05	-10.8751	0.0007697	240	33	0.0478261	690	10917	3.45823e+164	kek2,hiw,Akap200,Tom,dock,Mmp2,Sulf1,CG42450,sgg,aop,Dap160,pkaap,RSG7,crb,jeb,spict,rdx,cmpy,Fas2,kek4,Bili,Rdl,Ank2,Cbl,CG42684,stan,tow,aos,Apc,sty,peb,loco,Pka-C1
	GO:0030705	cytoskeleton-dependent intracellular transport	1.95e-05	-10.8475	0.0007806	39	11	0.015942	690	10917	3.60104e+56	dila,didum,Aplip1,Kap3,Klp68D,unc-104,futsch,CG9279,syd,Unc-76,klar
	GO:0042052	rhabdomere development	1.95e-05	-10.8475	0.0007806	39	11	0.015942	690	10917	3.56804e+54	didum,SP2353,chp,crb,Pph13,oc,Rip11,Syn2,Mob2,Ire1,Nrk
	GO:0071840	cellular component organization or biogenesis	1.97e-05	-10.8369	0.00078366	2347	193	0.27971	690	10917	35900,35184,32429,36401,38788,39332,36876,35021,35997,53437,37007,42496,33840,36445,42358,33599,38168,40143,40225,47091,43633,34073,42187,42297,44543,31045,5740204,31667,37201,32293,38863,32743,43469,37552,41363,38067,249072,317817,42213,33845,38218,36544,34927,37810,53563,4379834,43803,36176,39537,34646,33607,40126,35037,42986,43528,43758,33392,35523,35378,35259,39873,35977,32723,35197,38469,574…	babo,Lim3,hiw,wuc,Dscam2,Klp68D,unc-104,CG13284,Mmp2,Sulf1,Sema-1b,RhoGAP93B,CG9098,Nrk,Ire1,Shaw,rho,wnd,gogo,comt,tmod,CG14535,CG7156,nos,enc,CG3703,clos,Dok,ena,Rbp1-like,Ank2,RhoGAPp190,Ptp99A,Liprin-gamma,pros,klar,Liprin-alpha,CG32006,cona,mtm,drpr,AGO1,Gli,thoc5,gukh,stnB,Eph,metro,CG32137,crok,slp1,Rcd7,beat-IIIc,ssh,Cad99C,RhoGAP100F,aop,mle,Dap160,Lar,Nrt,brp,B-H2,brat,scrt,CG34340,Rim,…
	GO:0060627	regulation of vesicle-mediated transport	2.03e-05	-10.8058	0.00080306	69	15	0.0217391	690	10917	4.70914e+76	comt,brat,gish,step,stnB,Rim,Syt4,Rab26,comm,Nrx-1,Rab5,Syt1,CASK,corn,GABA-B-R2
	GO:0031290	retinal ganglion cell axon guidance	2.19e-05	-10.7287	0.0008561	11	6	0.00869565	690	10917	3.42774e+30	gcm,CdGAPr,Liprin-alpha,gogo,CadN,Lar
	GO:0045665	negative regulation of neuron differentiation	2.19e-05	-10.7287	0.0008561	11	6	0.00869565	690	10917	3.17817e+30	CG32006,slp2,aop,slp1,ro,sdk
	GO:0048859	formation of anatomical boundary	2.48e-05	-10.6048	0.00096276	47	12	0.0173913	690	10917	3.27233e+59	B-H2,B-H1,unc-5,Tom,spi,ena,lz,phyl,Brd,rho,neur,mirr
	GO:0043297	apical junction assembly	2.53e-05	-10.584	0.00097397	40	11	0.015942	690	10917	3.53433e+54	vari,bou,Gli,crb,Atpalpha,kune,cold,sdt,crok,loco,kst
	GO:0048729	tissue morphogenesis	2.54e-05	-10.5803	0.00097397	320	40	0.057971	690	10917	###############################################################################################################################################################################################################################################################	Tom,aop,Rab5,csw,ro,kermit,rho,mirr,mthl1,crb,sano,jeb,spi,pnr,rdx,CadN,Abl,Src64B,fw,gish,CdsA,sev,dnd,Dok,seq,ena,hbs,Fhos,sdt,Cbl,Krn,stan,tow,aos,mam,svp,slp1,sty,loco,peb
	GO:0010648	negative regulation of cell communication	2.67e-05	-10.5317	0.001016	244	33	0.0478261	690	10917	3.45823e+164	kek2,hiw,Akap200,Tom,dock,Mmp2,Sulf1,CG42450,sgg,aop,Dap160,pkaap,RSG7,crb,jeb,spict,rdx,cmpy,Fas2,kek4,Bili,Rdl,Ank2,Cbl,CG42684,stan,tow,aos,Apc,sty,peb,loco,Pka-C1
	GO:0045216	cell-cell junction organization	2.93e-05	-10.4362	0.0010967	63	14	0.0202899	690	10917	3.53433e+69	vari,bou,Gli,kirre,crb,Csk,Atpalpha,kune,cold,sdt,crok,Src64B,loco,kst
	GO:0034330	cell junction organization	2.93e-05	-10.4362	0.0010967	63	14	0.0202899	690	10917	3.53433e+69	vari,bou,Gli,kirre,crb,Csk,Atpalpha,kune,cold,sdt,crok,Src64B,loco,kst
	GO:0008049	male courtship behavior	2.93e-05	-10.4362	0.0010967	63	14	0.0202899	690	10917	3.29993e+69	amn,w,tipE,cac,gb,qtc,Tbh,Syn,FoxP,mle,para,CASK,retn,pros
	GO:0007613	memory	3.11e-05	-10.3795	0.001144	97	18	0.026087	690	10917	3.12714e+90	w,Ank2,Tbh,Nmdar2,drl,tau,CASK,brp,Appl,amn,klg,Mob2,Syn,Fas2,2mit,neur,Src64B,Pka-C1
	GO:0050770	regulation of axonogenesis	3.12e-05	-10.3764	0.001144	34	10	0.0144928	690	10917	3.61252e+52	stan,Liprin-alpha,DAAM,Sema-1a,seq,CadN,RhoGAPp190,Lar,pros,ssh
	GO:0045597	positive regulation of cell differentiation	3.12e-05	-10.3755	0.001144	48	12	0.0173913	690	10917	3.17817e+60	CG32006,sev,aret,oc,spi,gcm,Fhos,slp2,aop,kat-60L1,slp1,Dap160
	GO:0006836	neurotransmitter transport	3.18e-05	-10.3572	0.0011568	134	22	0.0318841	690	10917	3.21584e+111	cac,Syt4,Syt7,Sytbeta,Dap160,Rab3,CASK,Syt12,Syx13,Syt14,comt,brp,stj,DAT,stnB,Rim,CG43066,Caps,Syn,Syt1,cpx,CanB
	GO:0048583	regulation of response to stimulus	3.19e-05	-10.3522	0.0011568	835	82	0.118841	690	10917	34582,41833,35900,318005,32429,34170,33262,35997,40224,53437,43683,31718,31248,42496,33840,34957,38168,32674,41310,42896,35646,41704,34681,31364,36897,47746,38082,53472,38961,32754,36606,249072,38755,44642,38833,39052,37451,35588,39063,39619,32874,33392,38321,41096,35378,35259,46027,41252,40205,36295,35253,34633,44849,36554,35070,40288,2768944,41085,44275,31229,34718,36881,43019,34431,38178,35425…	kek2,SIDL,babo,sphinx1,hiw,Akap200,dock,Mmp2,rdgC,Sulf1,stops,Tbh,sgg,RhoGAP93B,CG9098,pkaap,rho,RSG7,Tsp86D,crb,Gadd45,rdx,spict,Fas2,inaC,Lk,ebd1,Aplip1,Cbl,CG42684,phyl,Liprin-alpha,tow,Apc,sphinx2,nwk,MESK2,Epac,PGRP-LC,Tom,CG42450,aop,dos,ird1,Dap160,Lar,kermit,CG42795,CG42674,jeb,spi,Ced-12,pnr,RN-tre,CadN,cmpy,rho-5,neur,SoxN,boi,kek4,CG5522,Bili,CG5337,CG7852,step,Rdl,Sema-1a,Ndfip,hbs,Kr…
	GO:0007389	pattern specification process	3.75e-05	-10.1915	0.0013503	513	56	0.0811594	690	10917	43528,42115,39619,53437,31248,33418,38321,45278,43023,38168,35197,32723,36703,40046,53579,35253,43146,34277,44849,42297,33608,44543,31883,43656,35070,39620,41085,31229,35680,5740204,49701,31075,32039,37201,44856,32846,38961,40105,36606,45976,326198,317817,36125,32724,37345,38218,34927,36544,39833,31802,33607,44642,38424,42672,31391,34284	Cad99C,sll,Tom,Sulf1,sgg,Rab5,dos,csw,dan,rho,brat,B-H2,unc-5,CG14073,Dip3,spi,boss,gcm,pnr,nos,slp2,enc,lz,tll,CadN,Brd,neur,boi,didum,clos,gish,DAAM,sev,ena,ru,Bx,Cbl,CG32206,phyl,retn,Krn,CG32006,stan,B-H1,exu,drpr,Gli,AGO1,aos,oc,slp1,Apc,sty,loco,peb,Pka-C1
	GO:0006357	regulation of transcription from RNA polymerase II promoter	3.84e-05	-10.1684	0.0013735	418	48	0.0695652	690	10917	40370,43825,32429,44786,36401,33392,41612,43234,35523,38321,45278,35662,39441,47767,32723,53579,38469,42210,39418,34277,44849,31883,33608,43656,38198,44275,5740204,32039,3772396,35168,45976,41363,35402,47285,44936,317817,33916,32724,45816,36555,37978,31802,37471,33607,39089,43793,38424,31391	Aef1,sv,hiw,nerfin-1,wuc,aop,sim,ro,mle,dos,csw,so,mirr,crc,B-H2,Dip3,scrt,gl,toe,gcm,pnr,lz,slp2,tll,Bgb,SoxN,clos,sev,seq,Side,retn,pros,Mio,repo,Eip93F,CG32006,eya,B-H1,onecut,mam,Atf-2,oc,NC2alpha,slp1,MTF-1,bip2,sty,peb
	GO:0048640	negative regulation of developmental growth	3.9e-05	-10.1529	0.0013866	49	12	0.0173913	690	10917	3.90523e+61	nwk,hiw,stj,unc-104,seq,spict,Mob2,sgg,TBPH,Liprin-gamma,Abl,Src64B
	GO:0003002	regionalization	3.98e-05	-10.1313	0.0014086	466	52	0.0753623	690	10917	43528,42115,39619,31248,33418,38321,45278,43023,38168,35197,32723,36703,40046,53579,35253,43146,34277,44849,42297,33608,44543,31883,43656,39620,41085,31229,35680,5740204,31075,32039,37201,44856,32846,38961,40105,36606,45976,36125,317817,32724,37345,38218,34927,36544,39833,31802,33607,44642,38424,42672,31391,34284	Cad99C,sll,Tom,sgg,Rab5,dos,csw,dan,rho,brat,B-H2,unc-5,CG14073,Dip3,spi,boss,gcm,pnr,nos,slp2,enc,lz,tll,Brd,neur,boi,didum,clos,DAAM,sev,ena,ru,Bx,Cbl,CG32206,phyl,retn,stan,CG32006,B-H1,exu,drpr,Gli,AGO1,aos,oc,slp1,Apc,sty,loco,peb,Pka-C1
	GO:0035152	regulation of tube architecture, open tracheal system	4.11e-05	-10.1	0.0014398	73	15	0.0217391	690	10917	3.61254e+74	stan,vari,bou,Gli,DAAM,sano,Atpalpha,cold,kune,crok,Fas2,wus,rho,peb,klar
	GO:0016198	axon choice point recognition	4.12e-05	-10.0976	0.0014398	35	10	0.0144928	690	10917	3.17817e+50	CG32006,alpha-Spec,Sema-1a,comm,slp2,tutl,RhoGAP93B,slp1,Abl,drl
	GO:0010975	regulation of neuron projection development	4.26e-05	-10.0646	0.0014795	65	14	0.0202899	690	10917	3.61252e+72	stan,Liprin-alpha,DAAM,unc-104,Sema-1a,seq,comm,CadN,tutl,kat-60L1,RhoGAPp190,Lar,pros,ssh
	GO:0006810	transport	4.71e-05	-9.96419	0.0016207	1543	134	0.194203	690	10917	37614,41833,36488,31456,43806,39332,36876,35021,39461,43783,32619,33599,39093,47091,34268,36897,47746,40580,38504,37201,38651,41426,31107,35370,38961,41363,32290,35620,38067,249072,33845,38218,37810,33247,4379834,31550,35578,37864,33520,318563,39063,40876,33392,35378,31179,35977,35197,36849,42150,43265,37230,38418,42960,35680,36010,31271,35425,40551,36145,31071,44936,35408,43816,37129,49968,40462…	CG42260,SIDL,CG42321,SK,CG9935,Klp68D,unc-104,CG13284,Ent3,Syt7,para,Shaw,CG3529,comt,Oatp30B,inaC,Lk,rpk,tipE,ena,Cralbp,HisCl1,Nmdar2,tadr,Cbl,pros,Syt12,Tsp42Ej,klar,Liprin-alpha,mtm,drpr,thoc5,Eaat2,stnB,Ca-alpha1T,CG3409,tamo,cnir,CG31030,PGRP-LC,Syt4,aop,Dap160,Unc-76,brp,brat,DAT,Rim,gb,hts,kst,RabX4,didum,dila,w,step,CG1090,CG12344,CG3638,Eip93F,nrv3,MED26,CG43066,Caps,Hem,CG9279,Sln,loco…
	GO:1902803	regulation of synaptic vesicle transport	4.74e-05	-9.95612	0.0016207	8	5	0.00724638	690	10917	3.51974e+26	brat,Nrx-1,stnB,CASK,GABA-B-R2
	GO:2000331	regulation of terminal button organization	4.74e-05	-9.95612	0.0016207	8	5	0.00724638	690	10917	4.01434e+24	wnd,Nrx-1,Aplip1,hiw,CASK
	GO:0048518	positive regulation of biological process	4.79e-05	-9.94666	0.0016268	962	91	0.131884	690	10917	35900,318005,32158,35997,53437,32551,31248,41612,43234,33840,42567,38168,47091,53579,41310,42896,41704,39717,31883,33608,43656,38198,31245,38082,33239,41398,37201,38863,38786,41363,33916,317817,45816,33607,44642,3885573,38833,39089,43793,43825,37451,39063,40876,33392,35523,40715,41096,35378,35662,39441,47767,40205,32999,45922,34648,42210,36295,35253,44849,34277,40014,45821,33473,37447,41085,48973…	babo,sphinx1,cac,Mmp2,Sulf1,CycD,sgg,sim,ro,CG9098,CASK,rho,comt,Dip3,Tsp86D,crb,rdx,comm,lz,slp2,tll,Bgb,Seipin,ebd1,Pph13,Csk,ena,Ank2,corn,pros,eya,CG32006,onecut,slp1,Apc,Octbeta3R,sphinx2,MTF-1,bip2,sv,MESK2,PGRP-LC,Syt4,aop,mle,kat-60L1,ird1,Dap160,so,mirr,crc,CG42674,amn,rap,aret,gl,jeb,spi,pnr,gcm,grim,Abl,Syt1,Sdc,neur,Src64B,SoxN,boi,didum,sev,DAAM,step,ru,Fhos,hbs,Nrx-1,Bx,retn,repo,Kr…
	GO:0060541	respiratory system development	4.83e-05	-9.93862	0.0016307	219	30	0.0434783	690	10917	3.66094e+151	Oaz,Cad96Cb,CdsA,DAAM,seq,Mmp2,dnd,ru,Fhos,csw,wus,rho,klar,stan,vari,bou,Gli,crb,sano,spi,Atpalpha,cold,kune,crok,Fas2,Cad88C,sty,Src64B,peb,Sdc
	GO:0048522	positive regulation of cellular process	5.29e-05	-9.84636	0.0017782	847	82	0.118841	690	10917	35900,318005,32158,53437,32551,31248,41612,43234,33840,38168,47091,53579,41310,42896,41704,39717,31883,33608,43656,38198,38082,33239,41398,37201,38863,38786,33916,317817,45816,33607,3885573,38833,39089,43793,43825,37451,39063,40876,33392,35523,40715,41096,35378,35662,39441,47767,40205,32999,45922,34648,42210,36295,35253,44849,34277,40014,33473,37447,41085,48973,44275,31229,35680,31075,32039,35425…	babo,sphinx1,cac,Sulf1,CycD,sgg,sim,ro,CG9098,rho,comt,Dip3,Tsp86D,crb,rdx,comm,lz,slp2,tll,Bgb,ebd1,Pph13,Csk,ena,Ank2,corn,eya,CG32006,onecut,slp1,Octbeta3R,sphinx2,MTF-1,bip2,sv,MESK2,PGRP-LC,Syt4,aop,mle,kat-60L1,ird1,Dap160,so,mirr,crc,CG42674,amn,rap,aret,gl,jeb,spi,pnr,gcm,grim,Syt1,Sdc,neur,Src64B,SoxN,boi,didum,DAAM,sev,step,ru,Fhos,hbs,Bx,retn,Krn,Eip93F,stan,aos,alpha-Spec,mam,Jupiter,…
	GO:0051648	vesicle localization	5.32e-05	-9.84061	0.0017785	110	19	0.0275362	690	10917	5.34724e+97	Aplip1,Pi4KIIalpha,unc-104,Syt4,Syt7,Rab5,Sytbeta,Dap160,CASK,Syx13,comt,Liprin-alpha,stj,stnB,Rim,Caps,Syn,Syt1,cpx
	GO:0051234	establishment of localization	5.4e-05	-9.82692	0.001793	1603	138	0.2	690	10917	37614,41833,36488,31456,43806,39332,36876,35021,39461,43783,32619,33599,39093,47091,34268,36897,47746,40580,38504,37201,38651,41426,31107,35370,38961,41363,32290,35620,38067,249072,33845,38218,37810,33247,4379834,31550,35578,37864,33520,318563,39063,40876,33392,35378,31179,35977,35197,36849,42150,43265,37230,38418,42960,35680,36010,31271,35425,40551,36145,31071,44936,32152,35408,43816,37129,40462…	CG42260,SIDL,CG42321,SK,CG9935,Klp68D,unc-104,CG13284,Ent3,Syt7,para,Shaw,CG3529,comt,Oatp30B,inaC,Lk,rpk,tipE,ena,Cralbp,HisCl1,Nmdar2,tadr,Cbl,pros,Syt12,Tsp42Ej,klar,Liprin-alpha,mtm,drpr,thoc5,Eaat2,stnB,Ca-alpha1T,CG3409,tamo,cnir,CG31030,PGRP-LC,Syt4,aop,Dap160,Unc-76,brp,brat,DAT,Rim,gb,hts,kst,RabX4,didum,dila,w,step,CG1090,CG12344,CG3638,Eip93F,wisp,nrv3,MED26,CG43066,Hem,Caps,CG9279,Sln…
	GO:0007424	open tracheal system development	6.05e-05	-9.71344	0.0019974	211	29	0.042029	690	10917	3.66094e+146	Oaz,Cad96Cb,CdsA,DAAM,seq,Mmp2,dnd,ru,csw,wus,rho,klar,stan,vari,bou,Gli,crb,sano,spi,Atpalpha,cold,kune,crok,Fas2,Cad88C,sty,Src64B,peb,Sdc
	GO:0007166	cell surface receptor signaling pathway	6.34e-05	-9.6667	0.0020814	535	57	0.0826087	690	10917	35900,33374,43528,32429,39063,35832,34367,39619,33262,31718,31248,38321,45278,46027,36445,38168,39441,42561,32637,32999,31744,35253,44849,36436,43146,43656,45821,36897,39620,47746,31229,5740204,49701,43950,32544,32039,34878,34192,36258,44856,38169,31107,38961,40105,326198,5740362,36125,38057,36555,43803,318046,40644,37099,3885573,38424,31391,34284	babo,Npc2a,Cad99C,hiw,PGRP-LC,mtt,Ror,Tom,dock,Tbh,sgg,dos,csw,kermit,Nrk,rho,mirr,GABA-B-R2,mthl1,amn,Gbeta5,spi,pnr,Drl-2,boss,tll,Abl,inaC,Brd,Lk,boi,clos,gish,CdsA,Gbeta13F,sev,GABA-B-R1,Sema-1a,ths,ru,stet,Nmdar2,Cbl,CG32206,Krn,CG34384,stan,mthl10,mam,Eph,mthl14,7B2,IM23,Octbeta3R,sty,peb,Pka-C1
	GO:0007264	small GTPase mediated signal transduction	6.52e-05	-9.63788	0.0021306	121	20	0.0289855	690	10917	3.21954e+99	Rab40,RabX4,RabX5,RhoGAP100F,Gie,dnd,RhoBTB,Lrch,Rab5,RhoGAPp190,CG42684,CG9098,phyl,Rab3,CdGAPr,Rab14,Rab26,CG5160,CG8500,ltd
	GO:0042063	gliogenesis	6.72e-05	-9.60758	0.0021842	76	15	0.0217391	690	10917	3.67035e+74	unc-5,gish,amn,rap,svp,kune,gcm,ths,gcm2,so,sty,retn,loco,pros,repo
	GO:0045314	regulation of compound eye photoreceptor development	7.29e-05	-9.52626	0.0023564	13	6	0.00869565	690	10917	3.33925e+29	aop,csw,Dip3,sty,oc,neur
	GO:1900242	regulation of synaptic vesicle endocytosis	7.52e-05	-9.49586	0.0024161	5	4	0.0057971	690	10917	3.51974e+21	brat,Nrx-1,stnB,CASK
	GO:0046903	secretion	9.57e-05	-9.25402	0.0030607	164	24	0.0347826	690	10917	3.21584e+122	cac,Syt4,Syt7,Sytbeta,Dap160,Rab3,CASK,Syt12,Syx13,Syt14,comt,brp,Tango5,g,stj,stnB,Rim,gb,Caps,Syn,Syt1,cpx,Lk,CanB
	GO:0002009	morphogenesis of an epithelium	9.85e-05	-9.22583	0.0031314	294	36	0.0521739	690	10917	3.96193e+182	Tom,aop,Rab5,csw,ro,kermit,rho,mirr,crb,sano,spi,pnr,rdx,CadN,Abl,Src64B,fw,gish,CdsA,sev,Dok,seq,dnd,ena,Fhos,hbs,sdt,Cbl,Krn,stan,tow,aos,svp,sty,loco,peb
	GO:0007169	transmembrane receptor protein tyrosine kinase signaling pathway	9.93e-05	-9.21783	0.0031399	115	19	0.0275362	690	10917	5.7402e+97	clos,sev,Ror,dock,ths,ru,stet,Cbl,dos,csw,Nrk,rho,Krn,Eph,spi,boss,tll,sty,peb
	GO:0060179	male mating behavior	0.000100503	-9.20532	0.0031627	70	14	0.0202899	690	10917	3.29993e+69	amn,w,tipE,cac,gb,qtc,Tbh,Syn,FoxP,mle,para,CASK,retn,pros
	GO:0007615	anesthesia-resistant memory	0.000101174	-9.19867	0.0031671	9	5	0.00724638	690	10917	3.59773e+24	brp,amn,CASK,klg,Pka-C1
	GO:0009968	negative regulation of signal transduction	0.000102363	-9.18698	0.0031877	228	30	0.0434783	690	10917	3.47183e+149	kek4,kek2,Bili,hiw,Akap200,Tom,dock,Mmp2,Sulf1,CG42450,sgg,aop,Cbl,Dap160,CG42684,pkaap,stan,RSG7,tow,aos,crb,spict,rdx,cmpy,Fas2,Apc,sty,loco,peb,Pka-C1
	GO:0010160	formation of organ boundary	0.000113262	-9.0858	0.0034728	39	10	0.0144928	690	10917	3.27233e+49	B-H2,B-H1,unc-5,Tom,spi,lz,phyl,Brd,neur,rho
	GO:0010001	glial cell differentiation	0.000113262	-9.0858	0.0034728	39	10	0.0144928	690	10917	4.59224e+49	rap,svp,ths,gcm,kune,gcm2,sty,loco,pros,repo
	GO:0040012	regulation of locomotion	0.000113262	-9.0858	0.0034728	39	10	0.0144928	690	10917	2.49072e+50	Liprin-alpha,unc-104,Sema-1a,ena,Tbh,Fhos,Nrx-1,CadN,Lar,CASK
	GO:0010720	positive regulation of cell development	0.000114638	-9.07373	0.0034971	32	9	0.0130435	690	10917	3.42773e+45	gcm,CG32006,slp2,Fhos,slp1,kat-60L1,Dap160,oc,spi
	GO:0048646	anatomical structure formation involved in morphogenesis	0.000118572	-9.03999	0.0035987	535	56	0.0811594	690	10917	43528,32071,31292,39619,33262,43571,35997,33418,43023,35662,38168,39441,32637,32723,36703,34648,36295,35253,34633,41704,33608,44543,31883,45821,37230,39620,48973,41085,35680,36010,49701,5740204,38998,31075,31290,34702,42443,41398,42580,37201,44129,36606,38067,33916,317817,39673,32724,38620,36544,38231,36555,39445,40462,33607,44642,43235	Cad99C,Kap3,kirre,Tom,dock,Sry-alpha,Mmp2,Rab5,dan,so,rho,mirr,mthl1,B-H2,unc-5,aret,jeb,spi,Ced-12,rdx,slp2,enc,lz,Abl,hts,Brd,Src64B,neur,didum,dila,gish,clos,Cp18,DAAM,rst,CG5142,CG15923,Csk,dnd,ena,hbs,phyl,klar,eya,CG32006,Z600,B-H1,blanks,AGO1,alpha-Spec,mam,Klc,Hem,slp1,Apc,T48
	GO:0042478	regulation of eye photoreceptor cell development	0.000120795	-9.02142	0.0036476	14	6	0.00869565	690	10917	3.33925e+29	aop,csw,Dip3,sty,oc,neur
	GO:0031344	regulation of cell projection organization	0.000125421	-8.98383	0.0037683	89	16	0.0231884	690	10917	4.35283e+82	Cad99C,DAAM,unc-104,seq,Sema-1a,ena,tutl,RhoGAPp190,kat-60L1,Lar,pros,stan,Liprin-alpha,comm,CadN,ssh
	GO:0048489	synaptic vesicle transport	0.000133916	-8.9183	0.0039638	108	18	0.026087	690	10917	5.34724e+92	Aplip1,unc-104,Syt4,Syt7,Rab5,Sytbeta,Dap160,CASK,Syx13,comt,Liprin-alpha,stj,stnB,Rim,Caps,Syn,Syt1,cpx
	GO:0097480	establishment of synaptic vesicle localization	0.000133916	-8.9183	0.0039638	108	18	0.026087	690	10917	5.34724e+92	Aplip1,unc-104,Syt4,Syt7,Rab5,Sytbeta,Dap160,CASK,Syx13,comt,Liprin-alpha,stj,stnB,Rim,Caps,Syn,Syt1,cpx
	GO:0097479	synaptic vesicle localization	0.000133916	-8.9183	0.0039638	108	18	0.026087	690	10917	5.34724e+92	Aplip1,unc-104,Syt4,Syt7,Rab5,Sytbeta,Dap160,CASK,Syx13,comt,Liprin-alpha,stj,stnB,Rim,Caps,Syn,Syt1,cpx
	GO:0032940	secretion by cell	0.000144263	-8.84387	0.004249	158	23	0.0333333	690	10917	3.21584e+117	cac,Syt4,Syt7,Sytbeta,Dap160,Rab3,CASK,Syx13,Syt12,Syt14,brp,comt,Tango5,g,stj,stnB,Rim,gb,Caps,Syn,Syt1,cpx,CanB
	GO:0051124	synaptic growth at neuromuscular junction	0.00014889	-8.8123	0.0043638	33	9	0.0130435	690	10917	2.49072e+45	Liprin-alpha,jeb,Atpalpha,sgg,Nrx-1,Lar,Dap160,cpx,repo
	GO:0051650	establishment of vesicle localization	0.000151157	-8.79719	0.0044086	109	18	0.026087	690	10917	5.34724e+92	Aplip1,unc-104,Syt4,Syt7,Rab5,Sytbeta,Dap160,CASK,Syx13,comt,Liprin-alpha,stj,stnB,Rim,Caps,Syn,Syt1,cpx
	GO:0042058	regulation of epidermal growth factor receptor signaling pathway	0.000155614	-8.76813	0.0044732	48	11	0.015942	690	10917	3.47183e+57	kek4,kek2,aos,spi,Sulf1,rho-5,Fas2,Cbl,sty,rho,Krn
	GO:0048645	organ formation	0.000155614	-8.76813	0.0044732	48	11	0.015942	690	10917	3.27233e+54	B-H2,B-H1,unc-5,Tom,spi,lz,slp1,phyl,Brd,neur,rho
	GO:1901184	regulation of ERBB signaling pathway	0.000155614	-8.76813	0.0044732	48	11	0.015942	690	10917	3.47183e+57	kek4,kek2,aos,spi,Sulf1,rho-5,Fas2,Cbl,sty,rho,Krn
	GO:0006887	exocytosis	0.000161224	-8.73272	0.0046122	73	14	0.0202899	690	10917	4.70914e+69	comt,g,stj,cac,Rim,Syt4,Caps,Syn,Syt7,Syt1,Sytbeta,cpx,CASK,Syx13
	GO:0007420	brain development	0.000162357	-8.72571	0.0046225	129	20	0.0289855	690	10917	3.59003e+99	babo,Sema-1a,sim,RhoGAPp190,rho,CG3638,pros,stan,brat,bsh,oc,Eph,Sema-5c,tll,Fas2,Apc,Src64B,neur,robo3,ssh
	GO:0090066	regulation of anatomical structure size	0.000168975	-8.68576	0.0047882	170	24	0.0347826	690	10917	3.90524e+122	nwk,Cad99C,DAAM,seq,Sema-1a,ena,RhoGAPp190,Lar,wus,stan,Liprin-alpha,vari,Gli,sano,Atpalpha,kune,cold,CadN,crok,Fas2,Abl,Src64B,ssh,kst
	GO:0045944	positive regulation of transcription from RNA polymerase II promoter	0.000199363	-8.52038	0.0056226	193	26	0.0376812	690	10917	4.38254e+130	sv,sim,ro,mle,so,Eip93F,eya,CG32006,crc,onecut,Dip3,mam,gl,Atf-2,oc,pnr,gcm,slp2,lz,tll,Bgb,NC2alpha,slp1,MTF-1,bip2,SoxN
	GO:0048790	maintenance of presynaptic active zone structure	0.000214172	-8.44873	0.0060119	6	4	0.0057971	690	10917	3.59774e+19	brp,RhoGAP100F,alpha-Spec,Rab3
	GO:0009888	tissue development	0.000227272	-8.38936	0.0063498	753	72	0.104348	690	10917	34170,31248,41612,33418,43234,45278,42567,38168,32637,41310,42896,32420,41704,33608,5740204,49701,43950,38998,31667,42580,37201,38961,38816,41363,317817,33916,38218,38755,34927,39445,33607,38491,43528,39619,33392,37341,46027,39696,35058,39441,37185,36295,35253,34633,44849,36554,35070,45821,48973,32162,41085,38418,32039,38531,3772396,36258,39004,44129,44861,326198,44936,36125,39833,39583,38231,365…	Akap200,sgg,sim,Rab5,ro,csw,CASK,rho,mthl1,Tsp86D,crb,CG9509,rdx,slp2,clos,gish,CdsA,Cp18,Dok,dnd,ena,Cbl,qm,pros,CG32006,eya,drpr,tow,Gli,Klc,slp1,ens,Cad99C,Tom,aop,CG11159,kermit,comm3,qua,mirr,sano,jeb,spi,Ced-12,pnr,RN-tre,CadN,Abl,Src64B,fw,neur,kst,sev,dyl,seq,ths,Fhos,hbs,sdt,Krn,Eip93F,stan,aos,bbg,alpha-Spec,mam,svp,oc,sty,loco,peb,robo3
	GO:0044765	single-organism transport	0.000232249	-8.3677	0.0064587	1360	117	0.169565	690	10917	37614,41833,36488,31456,43806,32158,39332,36876,35021,33109,5740544,41861,39461,43783,33418,45278,39630,32926,32619,36127,42567,33599,47091,42896,39717,34681,39836,34268,41025,36897,64877,47746,40580,53472,45338,36005,38504,33739,37201,32986,41426,31107,35370,43905,32683,37536,41363,32290,38067,249072,33845,38218,37345,43442,33247,4379834,34840,31550,43660,35578,33374,318563,39063,32071,42115,437…	CG42260,SIDL,CG42321,SK,CG9935,cac,Klp68D,unc-104,CG13284,tty,futsch,Sra-1,Ent3,Syt7,Rab5,csw,Sytbeta,out,para,Rab3,CASK,Shaw,comt,crb,comm,spict,st,Oatp30B,p,inaC,cpx,Lk,rpk,Aplip1,na,CG1688,tipE,qtc,ena,CG12531,HisCl1,Nmdar2,tadr,syd,wus,Vps35,pros,Syt12,klar,Liprin-alpha,mtm,drpr,exu,Vha100-1,Eaat2,stnB,Rab14,Ca-alpha1T,CG12071,CG3409,Npc2a,CG31030,PGRP-LC,Kap3,sll,PMCA,Syt4,Ca-beta,Task6,Dap1…
	GO:0051171	regulation of nitrogen compound metabolic process	0.000249163	-8.2974	0.0068652	1034	93	0.134783	690	10917	40370,41833,35184,32429,44786,36401,41423,36064,31248,41612,43234,42496,45278,42358,43362,53579,35266,42297,31883,33608,43656,38198,42110,38963,5740204,39999,33239,41363,33916,317817,32724,36544,38620,45816,31000,33607,3885573,39089,43793,34370,43825,39063,38184,33392,35523,38321,41096,43023,35662,39441,42561,41252,47767,32723,32999,38469,34648,42210,5740176,39418,34633,44849,34277,36554,34371,44…	Aef1,SIDL,Lim3,hiw,nerfin-1,wuc,l(3)neo38,gem,sgg,sim,ro,RhoGAP93B,csw,Ire1,CG34362,Dip3,bsh,nos,lz,slp2,tll,Bgb,Hmx,Unr,clos,Eip75B,Pph13,pros,eya,CG32006,B-H1,AGO1,blanks,onecut,elav,slp1,Octbeta3R,MTF-1,bip2,Rsf1,sv,PGRP-LC,CG7879,aop,mle,dos,ird1,dan,so,mirr,GABA-B-R2,CG42795,crc,B-H2,amn,scrt,aret,gl,CG34340,toe,Ced-12,pnr,gcm,RN-tre,CG18619,SoxN,CG5337,sev,Rox8,GABA-B-R1,seq,Side,Bx,gcm2,re…
	GO:0008344	adult locomotory behavior	0.000251325	-8.28877	0.0068652	76	14	0.0202899	690	10917	3.59774e+69	brp,dila,hiw,na,cac,Cdk5alpha,oc,Atpalpha,Tbh,sim,DCX-EMAP,tutl,TBPH,CASK
	GO:0048490	anterograde synaptic vesicle transport	0.000251458	-8.28823	0.0068652	3	3	0.00434783	690	10917	2490725347236870	Liprin-alpha,Aplip1,unc-104
	GO:0061541	rhabdomere morphogenesis	0.000251458	-8.28823	0.0068652	3	3	0.00434783	690	10917	428964235831802	crb,Ire1,oc
	GO:0016079	synaptic vesicle exocytosis	0.000264062	-8.23933	0.0071765	59	12	0.0173913	690	10917	4.70914e+59	comt,stj,Rim,Syt4,Caps,Syn,Syt7,Syt1,Sytbeta,cpx,CASK,Syx13
	GO:0043954	cellular component maintenance	0.000288384	-8.15122	0.007767	22	7	0.0101449	690	10917	3.59774e+34	brp,RhoGAP100F,alpha-Spec,crb,Rab3,Atf-2,Csk
	GO:0019219	regulation of nucleobase-containing compound metabolic process	0.000289345	-8.14789	0.007767	998	90	0.130435	690	10917	40370,41833,35184,32429,44786,36401,41423,36064,31248,41612,43234,42496,45278,42358,43362,53579,35266,42297,31883,33608,43656,38198,42110,38963,5740204,39999,33239,41363,33916,317817,32724,36544,38620,45816,31000,33607,3885573,39089,34370,43793,43825,38184,33392,35523,38321,43023,35662,39441,42561,41252,47767,32723,32999,38469,34648,42210,5740176,39418,34633,44849,34277,36554,34371,44275,34431,32…	Aef1,SIDL,Lim3,hiw,nerfin-1,wuc,l(3)neo38,gem,sgg,sim,ro,RhoGAP93B,csw,Ire1,CG34362,Dip3,bsh,nos,lz,slp2,tll,Bgb,Hmx,Unr,clos,Eip75B,Pph13,pros,eya,CG32006,B-H1,AGO1,blanks,onecut,elav,slp1,Octbeta3R,MTF-1,Rsf1,bip2,sv,CG7879,aop,mle,dos,dan,so,mirr,GABA-B-R2,CG42795,crc,B-H2,amn,scrt,aret,gl,CG34340,toe,Ced-12,pnr,gcm,RN-tre,CG18619,SoxN,CG5337,sev,Rox8,GABA-B-R1,seq,Side,Bx,gcm2,retn,Mio,repo,E…
	GO:0007619	courtship behavior	0.000289686	-8.14671	0.007767	77	14	0.0202899	690	10917	3.29993e+69	amn,w,tipE,cac,gb,qtc,Tbh,Syn,FoxP,mle,para,CASK,retn,pros
[truncated: 5,756 more rows]

## Sheet: Cl3
Significant GO terms	TermID	Term	Enrichment	logP	FDR_BH	Genes in Term	Target Genes in Term	Fraction of Targets in Term	Total Target Genes	Total Genes	Entrez Gene IDs	Gene Symbols
[truncated: 5,979 more rows]

[truncated: 8 more sheets: Cl4, Cl5, Cl6, Cl7, Cl8, Cl9, Cl10, Cl11]
